# Supplementary material
Source: publisher figshare collection journal article supplement (https://gsapubs.figshare.com/ndownloader/files/24571166)
Supplement: Supplementary file 1 [file 24571166]

## Sheet: Table S1
TABLE S1. 10Be data
This Supplemental Material accompanies Batbaatar, J., Gillespie, A.R., Koppes, M., Clark, D.H., Chadwick, O.A.,
Fink, D., Matmon, A., and Rupper, S., 2020, Glacier development in continental climate regions of central Asia,
in Waitt, R.B., Thackray, G.D., and Gillespie, A.R., eds., Untangling the Quaternary Period: A Legacy of
Stephen C. Porter: Geological Society of America Special Paper 548, https://doi.org/10.1130/2020.2548(07).
corresponding author email: bataa@uw.edu
Site (Subregion)	Sample name	Sample location		Altitude (m asl)	Thickness (cm)	Shielding factor	Quartz mass (g)	Be carrier (mg)	10Be/9Be	Uncertainty in 10Be/9Be	10Be concentration	Uncertainty in 10Be concentration	Name of Be standard used	Sample collection date (MM/DD/YY)
		Latitude, ° N	Longtiude, ° E								(atoms/g SiO2)
Kax Kurta (Altai)	XCS-120a	47.4611	89.8725	2794	5	0.97	--	--	--	--	625200	26600	KNSTD	1994-07-09
Kax Kurta (Altai)	XCS-120b	47.4611	89.8725	2794	5	0.97	--	--	--	--	660400	26100	KNSTD	1994-07-09
Kax Kurta (Altai)	XCS-121	47.4611	89.7994	2486	10	1	--	--	--	--	648000	50900	KNSTD	1994-07-10
Alashanje (E Tian Shan)	CS-111a	42.927	86.8783	3267	2.5	1	--	--	--	--	3874000	105400	KNSTD	1994-07-01
Alashanje (E Tian Shan)	CS-111b	42.927	86.8783	3267.46	2.5	1	--	--	--	--	2386900	73700	KNSTD	1994-07-01
Alashanje (E Tian Shan)	CS-112	43.0212	86.9759	3658	5	0.99	--	--	--	--	1067100	72000	KNSTD	1994-07-02
Daxigou (E Tian Shan)	CS-10	43.1188	86.9216	3181	8	0.97	--	--	--	--	639500	29300	KNSTD	1992-09-11
Daxigou (E Tian Shan)	CS-11b	43.1104	86.9446	3021	8	0.97	--	--	--	--	873400	35700	KNSTD	1992-09-11
Daxigou (E Tian Shan)	CS-12a	43.1104	86.9446	2992	8	0.97	--	--	--	--	717800	37500	KNSTD	1992-09-11
Daxigou (E Tian Shan)	CS-5	43.1159	86.8234	3718	5	0.97	--	--	--	--	20400	11200	KNSTD	1992-09-11
Daxigou (E Tian Shan)	CS-6	43.1159	86.8234	3718	5	0.97	--	--	--	--	86500	12800	KNSTD	1992-09-11
Daxigou (E Tian Shan)	CS-7b	43.1156	86.8414	3592	5	0.99	--	--	--	--	917300	40900	KNSTD	1992-09-11
Daxigou (E Tian Shan)	CS-8	43.1195	86.92	3417	1	0.99	--	--	--	--	957400	44600	KNSTD	1992-09-11
Diehanjelegou (E Tian Shan)	XCS-101	43.1588	87.441	3080	5	1	--	--	--	--	1590100	54200	KNSTD	1994-06-25
Diehanjelegou (E Tian Shan)	XCS-102	43.159	87.4403	3122	5	1	--	--	--	--	907300	33000	KNSTD	1994-06-25
Diehanjelegou (E Tian Shan)	XCS-103	43.1575	87.4502	3014	5	1	--	--	--	--	2191900	71900	KNSTD	1994-06-27
Diehanjelegou (E Tian Shan)	XCS-104	43.1569	87.4491	3025	5	1	--	--	--	--	1195500	65000	KNSTD	1994-06-27
Diehanjelegou (E Tian Shan)	XCS-105	43.1569	87.4491	3025	5	1	--	--	--	--	1669300	82200	KNSTD	1994-06-27
Diehanjelegou (E Tian Shan)	XCS-106	43.1569	87.4491	3025	5	1	--	--	--	--	952100	30000	KNSTD	1994-06-27
Altyn Tagh (Qilian Shan)	CAT-02C	39.3145	93.7419	4401	3	0.93	15.757	0.2446	8.987e-14	5.53e-15	93200	8200	07KNSTD	2011-09-23
Dumda (Qilian Shan)	CH-DU-01	37.8599	96.2881	4039	1	1	8.98	0.246	3.779e-12	4.42e-14	6917600	150500	07KNSTD	2011-09-20
Dumda (Qilian Shan)	CH-DU-02	37.852	96.2864	4036	1	1	6.872	0.2446	3.6423e-12	5.329e-14	8663000	217100	07KNSTD	2011-09-20
Dumda (Qilian Shan)	CH-DU-03	37.8628	96.2883	4056	1	1	7.135	0.2475	3.2949e-12	5.641e-14	7637400	214100	07KNSTD	2011-09-20
Gangshiqia (Qilian Shan)	QS-GG-001	37.6936	101.452	4085	3	1	7.89	0.246	3.133e-13	7.59e-15	652700	24200	07KNSTD	2011-09-16
Gangshiqia (Qilian Shan)	QS-GG-002	37.6936	101.452	4085	1	1	16.474	0.2446	7.9894e-13	1.572e-14	792700	24700	07KNSTD	2011-09-16
Gangshiqia (Qilian Shan)	QS-GG-003	37.6942	101.453	4101	5	1	16.251	0.246	8.2164e-13	1.708e-14	831100	27100	07KNSTD	2011-09-16
Gangshiqia (Qilian Shan)	QS-GG-004	37.6942	101.453	4101	5	1	14.127	0.2446	7.3581e-13	1.277e-14	851300	24100	07KNSTD	2011-09-16
Gangshiqia (Qilian Shan)	QS-GG-005	37.6942	101.453	4120	4	1	8.378	0.246	1.1409e-13	4.86e-15	223900	13900	07KNSTD	2011-09-16
Gangshiqia (Qilian Shan)	QS-GG-006	37.6944	101.454	4120	6	1	8.412	0.2446	9.194e-14	3.59e-15	178600	10200	07KNSTD	2011-09-16
Gangshiqia (Qilian Shan)	QS-GG-007	37.6911	101.452	4041	3	1	12.568	0.246	5.256e-13	1.193e-14	687500	24100	07KNSTD	2011-09-16
Gangshiqia (Qilian Shan)	QS-GG-008	37.6634	101.427	3615	4	0.99	12.229	0.246	6.1317e-13	2.043e-14	824200	40500	07KNSTD	2011-09-17
Gangshiqia (Qilian Shan)	QS-GG-009	37.6634	101.427	3615	3	0.99	9.306	0.246	4.445e-13	9.09e-15	785200	25300	07KNSTD	2011-09-17
Gangshiqia (Qilian Shan)	QS-GG-010	37.6605	101.424	3556	3	1	4.026	0.246	1.5895e-13	6.44e-15	649000	38300	07KNSTD	2011-09-17
Gangshiqia (Qilian Shan)	QS-GG-011	37.6605	101.424	3556	3	1	9.644	0.246	3.3318e-13	1.128e-14	567900	28400	07KNSTD	2011-09-17
Gangshiqia (Qilian Shan)	QS-GG-012	37.6549	101.416	3480	3	1	8.096	0.2446	3.7143e-13	1.885e-14	749900	54900	07KNSTD	2011-09-17
Gangshiqia (Qilian Shan)	QS-GG-013	37.6583	101.433	3640	2	1	11.253	0.2446	3.7375e-13	9.5e-15	542900	21000	07KNSTD	2011-09-17
Aksaiqin (W Kunlun)	AG1-1	35.3966	80.343	5410	0.5	1	--	--	--	--	4461700	177300	KNSTD	1995-04-07
Aksaiqin (W Kunlun)	AG1-2	35.3965	80.3428	5410	5	1	--	--	--	--	2432800	76000	KNSTD	1995-04-07
Aksaiqin (W Kunlun)	AG1-3	35.3994	80.3722	5500	0.5	1	--	--	--	--	1801000	43400	KNSTD	1995-04-07
Aksaiqin (W Kunlun)	AG1-4	35.3994	80.3722	5500	1	1	--	--	--	--	4908500	118800	KNSTD	1995-04-07
Aksaiqin (W Kunlun)	AG1-6	35.3973	80.3655	5460	1	1	--	--	--	--	19721300	585800	KNSTD	1995-04-07
Aksaiqin lake (W Kunlun)	LAS-1	35.2553	79.7437	4848	1.5	1	--	--	--	--	1694700	50500	KNSTD	1995-04-07
Aksaiqin lake (W Kunlun)	LAS-1-split-a	35.2553	79.7437	4848	1.5	1	--	--	--	--	5700000	155500	KNSTD	1995-04-07
Aksaiqin lake (W Kunlun)	LAS-1-split-b	35.2553	79.7437	4849	1.5	1	--	--	--	--	21588400	566100	KNSTD	1995-04-07
Aksaiqin lake (W Kunlun)	LAS-1-split-c	35.2553	79.7437	4850	1.5	1	--	--	--	--	765900	28100	KNSTD	1995-04-07
Aksaiqin lake (W Kunlun)	LAS-1-split-d	35.2553	79.7437	4851	1.5	1	--	--	--	--	2226600	68800	KNSTD	1995-04-07
Aksaiqin lake (W Kunlun)	LAS-2	35.2553	79.7437	4848	1.5	1	--	--	--	--	2389500	81400	KNSTD	1995-04-07
Aksaiqin lake (W Kunlun)	LAS-3	35.2553	79.7437	4848	1.5	1	--	--	--	--	1159900	77700	KNSTD	1995-04-07
Aksaiqin lake (W Kunlun)	LAS-4	35.2553	79.7437	4848	1.5	1	--	--	--	--	2809400	86800	KNSTD	1995-04-07
Karakax (W Kunlun)	KG1-10	36.4395	77.6567	5190	2.5	1	--	--	--	--	8477700	224700	KNSTD	1995-04-07
Karakax (W Kunlun)	KG1-11	36.442	77.6547	5223	3	1	--	--	--	--	2389500	81400	KNSTD	1995-04-07
Karakax (W Kunlun)	KG1-12	36.4474	77.6564	5330	3	1	--	--	--	--	14600	3300	KNSTD	1995-04-07
Karakax (W Kunlun)	KG1-14	36.4167	77.6641	4900	3	1	--	--	--	--	26433100	768200	KNSTD	1995-04-07
Karakax (W Kunlun)	KG1-15	36.4232	77.6755	4940	3	1	--	--	--	--	9881900	341400	KNSTD	1995-04-07
Karakax (W Kunlun)	KG1-5	36.438	77.6475	5230	1.5	1	--	--	--	--	56692900	12235500	KNSTD	1995-04-07
Karakax (W Kunlun)	KG1-6	36.4198	77.6625	4950	1.5	1	--	--	--	--	8070100	284500	KNSTD	1995-04-07
Karakax (W Kunlun)	KG1-7	36.4198	77.6625	4950	2	1	--	--	--	--	7013700	205200	KNSTD	1995-04-07
Karakax (W Kunlun)	KG1-8	36.4266	77.6639	5070	1.5	1	--	--	--	--	9584600	282200	KNSTD	1995-04-07
Karakax (W Kunlun)	KG1-9	36.427	77.6638	5085	1	1	--	--	--	--	7992400	211600	KNSTD	1995-04-07
Karakax (W Kunlun)	KG2-1	36.443	77.6812	4915	3.5	1	--	--	--	--	10815400	2391400	KNSTD	1995-04-07
Karakax (W Kunlun)	KG2-2	36.4167	77.6667	4700	2	0.99	--	--	--	--	9851100	2171300	KNSTD	1995-04-07
Karakax (W Kunlun)	KG2-3	36.4239	77.7078	4540	0.5	1	--	--	--	--	9054400	1997600	KNSTD	1995-04-07
Karakax (W Kunlun)	LIA-K-1	36.438	77.6475	5120	2.5	1	--	--	--	--	6100	26300	KNSTD	1995-04-07
Karakax (W Kunlun)	LIA-K-2	36.438	77.6475	5120	1.5	1	--	--	--	--	687600	25800	KNSTD	1995-04-07
Karakax (W Kunlun)	LIA-K-3	36.438	77.6475	5120	2	1	--	--	--	--	1024100	46700	KNSTD	1995-04-07
Karakax (W Kunlun)	LIA-K-4	36.438	77.6475	5120	2.5	1	--	--	--	--	25900	4200	KNSTD	1995-04-07
Barskoon suu (W Tian Shan)	BS-001A	41.8832	77.7057	3822	2	1	11.338	0.2711	1.03e-14	1.5e-15	16500	3400	07KNSTD	2011-06-10
Barskoon suu (W Tian Shan)	BS-002A	41.8832	77.7057	3822	2	1	14.826	0.2752	2.22e-14	3.1e-15	27500	5500	07KNSTD	2011-06-10
Barskoon suu (W Tian Shan)	BS-002B	41.8832	77.7057	3822	2	1	15.68	0.2697	1.55e-14	2.1e-15	17800	3400	07KNSTD	2011-06-10
Barskoon suu (W Tian Shan)	BS-004A	41.8829	41.8829	3831	3	1	14.097	0.2711	5.12e-14	4.6e-15	65800	8400	07KNSTD	2011-06-10
Barskoon suu (W Tian Shan)	BS-007A	41.8702	77.7341	3791	3	1	13.667	0.2766	6.362e-13	9.9e-15	860400	22500	07KNSTD	2011-06-10
Barskoon suu (W Tian Shan)	BS-007B	41.8702	77.7341	3791	5	1	15.077	0.2599	7.265e-13	1.05e-14	836800	20800	07KNSTD	2011-06-10
Barskoon suu (W Tian Shan)	BS-007C	41.8698	77.7356	3805	2	1	16.131	0.2724	9.089e-13	2.53e-14	1025600	42900	07KNSTD	2011-06-10
Barskoon suu (W Tian Shan)	BS-007D	41.8698	77.7356	3805	1	1	16.201	0.2655	6.26e-13	4.02e-14	685500	63000	07KNSTD	2011-06-10
Choktal (W Tian Shan)	CR-001A	42.7014	76.7009	3198	3	1	9.547	0.3016	4.173e-13	7.68e-15	880900	26100	07KNSTD	2011-06-11
Choktal (W Tian Shan)	CR-001B	42.7014	76.7009	3198	5	1	9.85	0.2738	4.9721e-13	1.054e-14	923500	30600	07KNSTD	2011-06-11
Choktal (W Tian Shan)	CR-001C	42.7014	76.7009	3190	3	1	10.858	0.2794	4.8776e-13	8.88e-15	838700	24600	07KNSTD	2011-06-11
Choktal (W Tian Shan)	CR-002A	42.7497	76.6954	3574	3	0.98	10.886	0.2655	7.51e-15	1.23e-15	12200	2800	07KNSTD	2011-06-12
Choktal (W Tian Shan)	CR-002D	42.7508	76.6951	3588	3	0.97	10.423	0.2655	7.32e-15	1.52e-15	12500	3700	07KNSTD	2011-06-12
Choktal (W Tian Shan)	CR-002E	42.7508	76.6951	3588	3	0.97	10.949	0.2711	7.23e-15	1.16e-15	12000	2700	07KNSTD	2011-06-12
Choktal (W Tian Shan)	CR-003A	42.7478	76.6939	3535	10	0.98	10.487	0.246	4.3775e-13	8.97e-15	686200	22100	07KNSTD	2011-06-12
Choktal (W Tian Shan)	CR-003C	42.7478	76.6939	3535	5	0.98	11.758	0.2572	4.841e-13	9.05e-15	707600	21200	07KNSTD	2011-06-12
Choktal (W Tian Shan)	CR-003D	42.7471	76.6943	3534	5	0.98	11.002	0.2863	4.2524e-13	8.46e-15	739400	23300	07KNSTD	2011-06-12
Gulbel (W Tian Shan)	GP-001	42.0389	77.1242	2803	3	1	13.345	0.2808	3.381e-13	1.98e-14	475400	39900	07KNSTD	2011-06-10
Gulbel (W Tian Shan)	GP-002A	42.7497	76.6954	3254	3	0.99	11.121	0.2419	4.8536e-13	9.32e-15	705500	21600	07KNSTD	2011-06-10
Gulbel (W Tian Shan)	GP-002C	42.7501	76.6954	3258	5	0.99	13.487	0.2613	4.8522e-13	1.48e-14	628200	28500	07KNSTD	2011-06-10
Gulbel (W Tian Shan)	GP-002D	42.7508	76.6951	3208	3	0.99	12.341	0.2808	4.3576e-13	8.15e-15	662500	19900	07KNSTD	2011-06-10
Gulbel (W Tian Shan)	GP-003A	42.0143	77.1993	3265	3	1	12.829	0.2641	5.197e-13	1.32e-14	714900	27600	07KNSTD	2011-06-10
Gulbel (W Tian Shan)	GP-003B	42.0143	77.1993	3265	3	1	14.079	0.2738	5.149e-13	2.11e-14	669100	39900	07KNSTD	2011-06-10
Gulbel (W Tian Shan)	GP-003C	42.0145	77.1982	3252	3	1	12.421	0.2766	4.923e-13	7.4e-15	732600	18700	07KNSTD	2011-06-10
Gulbel (W Tian Shan)	GP-004A	42.0381	77.1421	3001	3	1	12.132	0.2613	3.213e-13	1.19e-14	462400	25100	07KNSTD	2011-06-10
Gulbel (W Tian Shan)	GP-004B	42.0381	77.1421	3001	3	1	10.725	0.2627	1.0457e-12	3.24e-14	1711500	78800	07KNSTD	2011-06-10
Gulbel (W Tian Shan)	GP-005	42.0383	77.1206	2781	1	1	12.278	0.2613	4.796e-13	8.5e-15	682000	19600	07KNSTD	2011-06-10
Gulbel (W Tian Shan)	GP-006	42.0382	77.124	2798	2	1	11.82	0.2655	4.476e-13	8.5e-15	671800	20400	07KNSTD	2011-06-10
Muzart (W Tian Shan)	CS-28	41.7857	80.9061	1978	4	1	--	--	--	--	303100	23600	KNSTD	1992-09-22
Muzart (W Tian Shan)	CS-30	41.7915	80.905	2011	4	1	--	--	--	--	334300	19700	KNSTD	1992-09-22
Muzart (W Tian Shan)	CS-32	41.7747	80.9566	1889	4	1	--	--	--	--	336500	16500	KNSTD	1992-09-22
Muzart (W Tian Shan)	CS-33	41.7729	80.9587	1874	2	1	--	--	--	--	465900	75000	KNSTD	1992-09-22
Suek (W Tian Shan)	SO-CS-001	41.7082	77.8054	3432	3	1	9.819	0.2349	5.558e-13	1.26e-14	888500	31100	07KNSTD	2011-06-09
Suek (W Tian Shan)	SO-CS-002A	41.7014	77.8105	3402	2	1	9.416	0.2711	3.223e-13	8.6e-15	620100	25000	07KNSTD	2011-06-09
Suek (W Tian Shan)	SO-CS-002B	41.7014	77.8105	3402	5	1	10.307	0.246	5.856e-13	1.53e-14	933900	37000	07KNSTD	2011-06-09
Tailan (W Tian Shan)	CS-14	41.6021	80.4838	1677	6	1	--	--	--	--	97700	11200	KNSTD	1992-09-16
Tailan (W Tian Shan)	CS-20	41.6548	80.4596	2053	5	1	--	--	--	--	262400	16000	KNSTD	1992-09-18
Tailan (W Tian Shan)	CS-24	41.6306	80.4698	1879	3	1	--	--	--	--	161600	25600	KNSTD	1992-09-19
Tailan (W Tian Shan)	CS-27a	41.5426	80.4854	1565	5	1	--	--	--	--	95300	10500	KNSTD	1992-09-20

## Sheet: Table S2
TABLE S2. 26Al data
Glacier development in continental climate regions of central Asia
Jigjidsurengiin Batbaatar, Alan R. Gillespie, Michele Koppes, Douglas H. Clark, Oliver A. Chadwick, David Fink, Ari Matmon, Summer Rupper
corresponding author email: bataa@uw.edu
Site (Subregion)	Sample name	Sample location		Altitude (m asl)	Thickness (cm)	Shielding factor	26Al concentration	Uncertainty in 26Al concentration	Name of Al standard used	Sample collection date (MM/DD/YY)
		Latitude, ° N	Longtiude, ° E				(atoms g SiO2)
Kax Kurta (Altai)	XCS-120a	47.4611	89.8725	2794	5	0.97	4447800	294800	KNSTD	1994-07-09
Kax Kurta (Altai)	XCS-120b	47.4611	89.8725	2794	5	0.97	3770700	280100	KNSTD	1994-07-09
Kax Kurta (Altai)	XCS-121	47.4611	89.7994	2486	10	1	4114500	244500	KNSTD	1994-07-10
Alashanje (E Tian Shan)	CS-111a	42.927	86.8783	3267	2.5	1	24188300	1139800	KNSTD	1994-07-01
Alashanje (E Tian Shan)	CS-111b	42.927	86.8783	3267.46	2.5	1	15411700	794700	KNSTD	1994-07-01
Alashanje (E Tian Shan)	CS-112	43.0212	86.9759	3658	5	0.99	6991400	589800	KNSTD	1994-07-02
Daxigou (E Tian Shan)	CS-12a	43.1104	86.9446	2992	8	0.97	4592800	286200	KNSTD	1992-09-11
Daxigou (E Tian Shan)	CS-7b	43.1156	86.8414	3592	5	0.99	5161400	374700	KNSTD	1992-09-11
Daxigou (E Tian Shan)	CS-8	43.1195	86.92	3417	1	0.99	5415100	333400	KNSTD	1992-09-11
Diehanjelegou (E Tian Shan)	XCS-101	43.1588	87.441	3080	5	1	9823200	460100	KNSTD	1994-06-25
Diehanjelegou (E Tian Shan)	XCS-102	43.159	87.4403	3122	5	1	5284900	266200	KNSTD	1994-06-25
Diehanjelegou (E Tian Shan)	XCS-103	43.1575	87.4502	3014	5	1	12180800	571300	KNSTD	1994-06-27
Diehanjelegou (E Tian Shan)	XCS-104	43.1569	87.4491	3025	5	1	10412500	553300	KNSTD	1994-06-27
Diehanjelegou (E Tian Shan)	XCS-105	43.1569	87.4491	3025	5	1	10667800	564500	KNSTD	1994-06-27
Diehanjelegou (E Tian Shan)	XCS-106	43.1569	87.4491	3025	5	1	6062800	277800	KNSTD	1994-06-27
Aksaiqin (W Kunlun)	AG1-1	35.3966	80.343	5410	0.5	1	25801300	1245900	KNSTD	1995-04-07
Aksaiqin (W Kunlun)	AG1-2	35.3965	80.3428	5410	5	1	17482200	913400	KNSTD	1995-04-07
Aksaiqin (W Kunlun)	AG1-3	35.3994	80.3722	5500	0.5	1	9556400	522700	KNSTD	1995-04-07
Aksaiqin (W Kunlun)	AG1-4	35.3994	80.3722	5500	1	1	24213100	2076700	KNSTD	1995-04-07
Aksaiqin (W Kunlun)	AG1-6	35.3973	80.3655	5460	1	1	124199200	6767300	KNSTD	1995-04-07
Aksaiqin lake (W Kunlun)	LAS-1	35.2553	79.7437	4848	1.5	1	9702300	635900	KNSTD	1995-04-07
Aksaiqin lake (W Kunlun)	LAS-1-split-a	35.2553	79.7437	4848	1.5	1	28731000	1268700	KNSTD	1995-04-07
Aksaiqin lake (W Kunlun)	LAS-1-split-b	35.2553	79.7437	4849	1.5	1	93634100	4149000	KNSTD	1995-04-07
Aksaiqin lake (W Kunlun)	LAS-1-split-c	35.2553	79.7437	4850	1.5	1	4522200	200300	KNSTD	1995-04-07
Aksaiqin lake (W Kunlun)	LAS-1-split-d	35.2553	79.7437	4851	1.5	1	12958000	619300	KNSTD	1995-04-07
Aksaiqin lake (W Kunlun)	LAS-2	35.2553	79.7437	4848	1.5	1	13079500	607600	KNSTD	1995-04-07
Aksaiqin lake (W Kunlun)	LAS-3	35.2553	79.7437	4848	1.5	1	8155700	939200	KNSTD	1995-04-07
Aksaiqin lake (W Kunlun)	LAS-4	35.2553	79.7437	4848	1.5	1	15970700	734100	KNSTD	1995-04-07
Karakax (W Kunlun)	KG1-10	36.4395	77.6567	5190	2.5	1	49003300	2212300	KNSTD	1995-04-07
Karakax (W Kunlun)	KG1-11	36.442	77.6547	5223	3	1	13079500	607600	KNSTD	1995-04-07
Karakax (W Kunlun)	KG1-12	36.4474	77.6564	5330	3	1	66600	14000	KNSTD	1995-04-07
Karakax (W Kunlun)	KG1-13	36.443	77.6594	5270	1.5	1	21574900	989200	KNSTD	1995-04-07
Karakax (W Kunlun)	KG1-14	36.4167	77.6641	4900	3	1	145706800	12813800	KNSTD	1995-04-07
Karakax (W Kunlun)	KG1-15	36.4232	77.6755	4940	3	1	59997300	3134300	KNSTD	1995-04-07
Karakax (W Kunlun)	KG1-5	36.438	77.6475	5230	1.5	1	65818100	14394000	KNSTD	1995-04-07
Karakax (W Kunlun)	KG1-6	36.4198	77.6625	4950	1.5	1	50278300	2357600	KNSTD	1995-04-07
Karakax (W Kunlun)	KG1-7	36.4198	77.6625	4950	2	1	42906500	2085000	KNSTD	1995-04-07
Karakax (W Kunlun)	KG1-8	36.4266	77.6639	5070	1.5	1	55679300	2661300	KNSTD	1995-04-07
Karakax (W Kunlun)	KG1-9	36.427	77.6638	5085	1	1	49391900	2303800	KNSTD	1995-04-07
Karakax (W Kunlun)	KG2-1	36.443	77.6812	4915	3.5	1	9975300	2435300	KNSTD	1995-04-07
Karakax (W Kunlun)	KG2-2	36.4167	77.6667	4700	2	0.99	9403900	2305700	KNSTD	1995-04-07
Karakax (W Kunlun)	KG2-3	36.4239	77.7078	4540	0.5	1	8546600	2028300	KNSTD	1995-04-07
Karakax (W Kunlun)	LIA-K-1	36.438	77.6475	5120	2.5	1	63700	78800	KNSTD	1995-04-07
Karakax (W Kunlun)	LIA-K-2	36.438	77.6475	5120	1.5	1	3934400	194200	KNSTD	1995-04-07
Karakax (W Kunlun)	LIA-K-3	36.438	77.6475	5120	2	1	6460000	305800	KNSTD	1995-04-07
Karakax (W Kunlun)	LIA-K-4	36.438	77.6475	5120	2.5	1	117200	13100	KNSTD	1995-04-07
Muzart (W Tian Shan)	CS-28	41.7857	80.9061	1978	4	1	2183200	41400	KNSTD	1992-09-22
Muzart (W Tian Shan)	CS-30	41.7915	80.905	2011	4	1	1800300	133200	KNSTD	1992-09-22
Tailan (W Tian Shan)	CS-14	41.6021	80.4838	1677	6	1	463100	37000	KNSTD	1992-09-16
Tailan (W Tian Shan)	CS-20	41.6548	80.4596	2053	5	1	1391500	86500	KNSTD	1992-09-18
Tailan (W Tian Shan)	CS-24	41.6306	80.4698	1879	3	1	1160400	107500	KNSTD	1992-09-19
Tailan (W Tian Shan)	CS-27a	41.5426	80.4854	1565	5	1	361000	41400	KNSTD	1992-09-20

## Sheet: Table S3
TABLE S3. Data for CRONUS-Earth online calculator version 2.3 (http://hess.ess.washington.edu)
Glacier development in continental climate regions of central Asia
Jigjidsurengiin Batbaatar, Alan R. Gillespie, Michele Koppes, Douglas H. Clark, Oliver A. Chadwick, David Fink, Ari Matmon, Summer Rupper
corresponding author email: bataa@uw.edu
Site (Subregion)	Sample name (field)	Latitude, °N	Longitude, °E	Elevation	Elv.	Thickness	Density	Shielding correction	Erosion rate	10Be	+/-	Be AMS standard	26Al	+/-	Al AMS standard	Sampling date (MM/DD/YY)	Sample type	10Be-age	±1σ ext. unc.	±1σ int. unc.	26Al-age	±1σ ext. unc.	±1σ int. unc.		Age difference (10Be-26Al, yr)	Compounded ext. error (SQRT, yr)	% difference compared to 10Be-age	Ext./10Be-age	Ext./26Al-age
		(decimal degrees)		(m asl)	std = m asl	(cm)	(g cm−2)		(cm yr−1)	(atoms g−1)	(atoms g−1)		(atoms g−1)	(atoms g−1)				calculated using 'St' scaling (yr)			calculated using 'St' scaling (yr)
Kax Kurta (Altai)	XCS-120a	47.4611	89.8725	2794	std	5	2.65	0.97	0	625200	26600	KNSTD	4447800	294800	KNSTD	1994-07-09	boulder	16790	1610	720	19640	2140	1310		2850	2678	0.169744	0.0958904	0.108961
Kax Kurta (Altai)	XCS-120b	47.4611	89.8725	2794	std	5	2.65	0.97	0	660400	26100	KNSTD	3770700	280100	KNSTD	1994-07-09	boulder	17740	1680	700	16620	1900	1250		1120	2536.22	0.0631342	0.0947012	0.11432
Kax Kurta (Altai)	XCS-121	47.4611	89.7994	2486	std	10	2.65	1	0	648000	50900	KNSTD	4114500	244500	KNSTD	1994-07-10	boulder	21590	2520	1710	22540	2370	1350		950	3459.38	0.0440019	0.116721	0.105146
Alashanje (E Tian Shan)	CS-111a	42.927	86.8783	3267	std	2.5	2.65	1	0	3874000	105400	KNSTD	24188300	1139800	KNSTD	1994-07-01	boulder	84000	7690	2330	87680	8930	4320		3680	11784.8	0.0438095	0.0915476	0.101848
Alashanje (E Tian Shan)	CS-111b	42.927	86.8783	3267.46	std	2.5	2.65	1	0	2386900	73700	KNSTD	15411700	794700	KNSTD	1994-07-01	boulder	51340	4720	1610	54990	5640	2910		3650	7354.45	0.0710947	0.0919361	0.102564
Alashanje (E Tian Shan)	CS-112	43.0212	86.9759	3658	std	5	2.65	0.99	0	1067100	72000	KNSTD	6991400	589800	KNSTD	1994-07-02	boulder	18720	2050	1270	20170	2450	1720		1450	3194.53	0.0774573	0.109509	0.121468
Daxigou (E Tian Shan)	CS-10	43.1188	86.9216	3181	std	8	2.65	0.97	0	639500	29300	KNSTD	0	0	0	1992-09-11	boulder	15380	1500	710	--	--	--		--	--	--	0.0975293
Daxigou (E Tian Shan)	CS-11b	43.1104	86.9446	3021	std	8	2.65	0.97	0	873400	35700	KNSTD	0	0	0	1992-09-11	boulder	23180	2210	950	--	--	--		--	--	--	0.0953408
Daxigou (E Tian Shan)	CS-12a	43.1104	86.9446	2992	std	8	2.65	0.97	0	717800	37500	KNSTD	4592800	286200	KNSTD	1992-09-11	boulder	19370	1950	1020	20380	2180	1280		1010	2924.88	0.0521425	0.100671	0.106968
Daxigou (E Tian Shan)	CS-5	43.1159	86.8234	3718	std	5	2.65	0.97	0	20400	11200	KNSTD	0	0	0	1992-09-11	boulder	350	200	190	--	--	--		--	--	--	0.571429
Daxigou (E Tian Shan)	CS-6	43.1159	86.8234	3718	std	5	2.65	0.97	0	86500	12800	KNSTD	0	0	0	1992-09-11	boulder	1490	250	220	--	--	--		--	--	--	0.167785
Daxigou (E Tian Shan)	CS-7b	43.1156	86.8414	3592	std	5	2.65	0.99	0	917300	40900	KNSTD	5161400	374700	KNSTD	1992-09-11	boulder	16650	1610	750	15380	1740	1130		1270	2370.59	0.0762763	0.0966967	0.113134
Daxigou (E Tian Shan)	CS-8	43.1195	86.92	3417	std	1	2.65	0.99	0	957400	44600	KNSTD	5415100	333400	KNSTD	1992-09-11	boulder	18580	1820	870	17250	1830	1070		1330	2580.95	0.0715823	0.0979548	0.106087
Diehanjelegou (E Tian Shan)	XCS-101	43.1588	87.441	3080	std	5	2.65	1	0	1590100	54200	KNSTD	9823200	460100	KNSTD	1994-06-25	boulder	38640	3590	1330	39420	3910	1880		780	5308.13	0.0201863	0.0929089	0.0991882
Diehanjelegou (E Tian Shan)	XCS-102	43.159	87.4403	3122	std	5	2.65	1	0	907300	33000	KNSTD	5284900	266200	KNSTD	1994-06-25	boulder	21410	2000	780	20490	2050	1040		920	2864	0.0429706	0.0934143	0.100049
Diehanjelegou (E Tian Shan)	XCS-103	43.1575	87.4502	3014	std	5	2.65	1	0	2191900	71900	KNSTD	12180800	571300	KNSTD	1994-06-27	boulder	55690	5160	1850	51180	5110	2460		4510	7262.07	0.080984	0.0926558	0.0998437
Diehanjelegou (E Tian Shan)	XCS-104	43.1569	87.4491	3025	std	5	2.65	1	0	1195500	65000	KNSTD	10412500	553300	KNSTD	1994-06-27	boulder	29980	3060	1640	43290	4450	2350		13310	5400.56	0.443963	0.102068	0.102795
Diehanjelegou (E Tian Shan)	XCS-105	43.1569	87.4491	3025	std	5	2.65	1	0	1669300	82200	KNSTD	10667800	564500	KNSTD	1994-06-27	boulder	41980	4180	2090	44380	4560	2400		2400	6185.95	0.0571701	0.0995712	0.102749
Diehanjelegou (E Tian Shan)	XCS-106	43.1569	87.4491	3025	std	5	2.65	1	0	952100	30000	KNSTD	6062800	277800	KNSTD	1994-06-27	boulder	23840	2180	760	24980	2450	1160		1140	3279.47	0.0478188	0.091443	0.0980785
Altyn Tagh (Qilian Shan)	CAT-02C	39.3145	93.7419	4401	std	3	2.65	0.93	0	93200	8200	07KNSTD	0	0	0	2011-09-23	boulder	1440	180	130	--	--	--		--	--	--	0.125
Dumda (Qilian Shan)	CH-DU-01	37.8599	96.2881	4039	std	1	2.65	1	0	6917600	150500	07KNSTD	0	0	0	2011-09-20	boulder	125390	11400	2820	--	--	--		--	--	--	0.0909163
Dumda (Qilian Shan)	CH-DU-02	37.852	96.2864	4036	std	1	2.65	1	0	8663000	217100	07KNSTD	0	0	0	2011-09-20	boulder	158610	14690	4140	--	--	--		--	--	--	0.0926171
Dumda (Qilian Shan)	CH-DU-03	37.8628	96.2883	4056	std	1	2.65	1	0	7637400	214100	07KNSTD	0	0	0	2011-09-20	boulder	137640	12800	3990	--	--	--		--	--	--	0.0929962
Gangshiqia (Qilian Shan)	QS-GG-001	37.6936	101.452	4085	std	3	2.65	1	0	652700	24200	07KNSTD	0	0	0	2011-09-16	boulder	11310	1060	420	--	--	--		--	--	--	0.0937224
Gangshiqia (Qilian Shan)	QS-GG-002	37.6936	101.452	4085	std	1	2.65	1	0	792700	24700	07KNSTD	0	0	0	2011-09-16	boulder	13520	1230	420	--	--	--		--	--	--	0.0909763
Gangshiqia (Qilian Shan)	QS-GG-003	37.6942	101.453	4101	std	5	2.65	1	0	831100	27100	07KNSTD	0	0	0	2011-09-16	boulder	14540	1330	480	--	--	--		--	--	--	0.0914718
Gangshiqia (Qilian Shan)	QS-GG-004	37.6942	101.453	4101	std	5	2.65	1	0	851300	24100	07KNSTD	0	0	0	2011-09-16	boulder	14890	1340	420	--	--	--		--	--	--	0.0899933
Gangshiqia (Qilian Shan)	QS-GG-005	37.6942	101.453	4120	std	4	2.65	1	0	223900	13900	07KNSTD	0	0	0	2011-09-16	boulder	3840	410	240	--	--	--		--	--	--	0.106771
Gangshiqia (Qilian Shan)	QS-GG-006	37.6944	101.454	4120	std	6	2.65	1	0	178600	10200	07KNSTD	0	0	0	2011-09-16	boulder	3110	320	180	--	--	--		--	--	--	0.102894
Gangshiqia (Qilian Shan)	QS-GG-007	37.6911	101.452	4041	std	3	2.65	1	0	687500	24100	07KNSTD	0	0	0	2011-09-16	boulder	12190	1130	430	--	--	--		--	--	--	0.0926989
Gangshiqia (Qilian Shan)	QS-GG-008	37.6634	101.427	3615	std	4	2.65	0.99	0	824200	40500	07KNSTD	0	0	0	2011-09-17	boulder	18690	1850	920	--	--	--		--	--	--	0.0989834
Gangshiqia (Qilian Shan)	QS-GG-009	37.6634	101.427	3615	std	3	2.65	0.99	0	785200	25300	07KNSTD	0	0	0	2011-09-17	boulder	17660	1620	570	--	--	--		--	--	--	0.0917327
Gangshiqia (Qilian Shan)	QS-GG-010	37.6605	101.424	3556	std	3	2.65	1	0	649000	38300	07KNSTD	0	0	0	2011-09-17	boulder	14920	1550	880	--	--	--		--	--	--	0.103887
Gangshiqia (Qilian Shan)	QS-GG-011	37.6605	101.424	3556	std	3	2.65	1	0	567900	28400	07KNSTD	0	0	0	2011-09-17	boulder	13050	1300	660	--	--	--		--	--	--	0.0996169
Gangshiqia (Qilian Shan)	QS-GG-012	37.6549	101.416	3480	std	3	2.65	1	0	749900	54900	07KNSTD	0	0	0	2011-09-17	boulder	17990	2030	1320	--	--	--		--	--	--	0.11284
Gangshiqia (Qilian Shan)	QS-GG-013	37.6583	101.433	3640	std	2	2.65	1	0	542900	21000	07KNSTD	0	0	0	2011-09-17	boulder	11810	1110	460	--	--	--		--	--	--	0.0939881
Aksaiqin (W Kunlun)	AG1-1	35.3966	80.3429	5450	std	0.5	2.65	1	0	4461700	177300	KNSTD	25801300	1245900	KNSTD	1995-04-07	boulder	39730	3780	1590	37920	3790	1870		1810	5352.8	0.0455575	0.0951422	0.0999473
Aksaiqin (W Kunlun)	AG1-2	35.3965	80.3428	5450	std	5	2.65	1	0	2432800	76000	KNSTD	17482200	913400	KNSTD	1995-04-07	boulder	22380	2050	700	26520	2690	1400		4140	3382.1	0.184987	0.0915996	0.101433
Aksaiqin (W Kunlun)	AG1-3	35.3994	80.3722	5510	std	0.5	2.65	1	0	1801000	43400	KNSTD	9556400	522700	KNSTD	1995-04-07	boulder	15530	1380	380	13530	1380	750		2000	1951.61	0.128783	0.0888603	0.101996
Aksaiqin (W Kunlun)	AG1-4	35.3994	80.3722	5510	std	1	2.65	1	0	4908500	118800	KNSTD	24213100	2076700	KNSTD	1995-04-07	boulder	42800	3840	1050	34770	4280	3030		8030	5750.13	0.187617	0.0897196	0.123095
Aksaiqin (W Kunlun)	AG1-6	35.3973	80.3655	5428	std	1	2.65	1	0	19721300	585800	KNSTD	124199200	6767300	KNSTD	1995-04-07	boulder	184480	17470	5740	200070	22390	12050		15590	28399.2	0.0845078	0.0946986	0.111911
Aksaiqin lake (W Kunlun)	LAS-1	35.2553	79.7437	4857	std	1.5	2.65	1	0	1694700	50500	KNSTD	9702300	635900	KNSTD	1995-08-01	pebble	19820	1800	590	18640	2030	1230		1180	2713.1	0.0595358	0.0908174	0.108906
Aksaiqin lake (W Kunlun)	LAS-1_split-a	35.2604	79.7463	4857	std	1.5	2.65	1	0	5700000	155500	KNSTD	28731000	1268700	KNSTD	1995-08-01	pebble	67440	6150	1870	56220	5560	2550		11220	8290.72	0.16637	0.0911922	0.0988972
Aksaiqin lake (W Kunlun)	LAS-1_split-b	35.2604	79.7463	4857	std	1.5	2.65	1	0	21588400	566100	KNSTD	93634100	4149000	KNSTD	1995-08-01	pebble	268390	25650	7530	195960	20790	9580		72430	33017.4	0.269868	0.0955699	0.106093
Aksaiqin lake (W Kunlun)	LAS-1_split-c	35.2604	79.7463	4857	std	1.5	2.65	1	0	765900	28100	KNSTD	4522200	200300	KNSTD	1995-08-01	pebble	8930	830	330	8650	840	390		280	1180.89	0.031355	0.0929451	0.0971098
Aksaiqin lake (W Kunlun)	LAS-1_split-d	35.2604	79.7463	4857	std	1.5	2.65	1	0	2226600	68800	KNSTD	12958000	619300	KNSTD	1995-08-01	pebble	26080	2380	810	24970	2470	1210		1110	3430.06	0.0425613	0.0912577	0.0989187
Aksaiqin lake (W Kunlun)	LAS-2	35.2553	79.7437	4859	std	1.5	2.65	1	0	2389500	81400	KNSTD	13079500	607600	KNSTD	1995-08-01	boulder	27980	2590	960	25190	2480	1190		2790	3585.88	0.0997141	0.0925661	0.0984518
Aksaiqin lake (W Kunlun)	LAS-3	35.2553	79.7437	4863	std	1.5	2.65	1	0	1159900	77700	KNSTD	8155700	939200	KNSTD	1995-08-01	boulder	13510	1470	910	15610	2250	1810		2100	2687.64	0.15544	0.108808	0.144138
Aksaiqin lake (W Kunlun)	LAS-4	35.2553	79.7437	4875	std	1.5	2.65	1	0	2809400	86800	KNSTD	15970700	734100	KNSTD	1995-08-01	boulder	32690	2990	1020	30610	3010	1430		2080	4242.66	0.063628	0.0914653	0.0983339
Karakax (W Kunlun)	KG1-10	36.4432	77.6568	5225	std	2.5	2.65	1	0	8477700	224700	KNSTD	49003300	2212300	KNSTD	1995-04-07	boulder	81780	7460	2210	78780	7910	3700		3000	10872.9	0.0366838	0.0912203	0.100406
Karakax (W Kunlun)	KG1-11	36.442	77.6547	5223	std	3	2.65	1	0	2389500	81400	KNSTD	13079500	607600	KNSTD	1995-04-07	boulder	22830	2110	780	20540	2020	960		2290	2921.04	0.100307	0.0924223	0.0983447
Karakax (W Kunlun)	KG1-12	36.4474	77.6564	5330	std	3	2.65	1	0	14600	3300	KNSTD	66600	14000	KNSTD	1995-04-07	boulder	130	30	30	100	20	20		30	36.0555	0.230769		0.2
Karakax (W Kunlun)	KG1-13	36.4451	77.6573	5270	std	1.5	2.65	1	0	0	0	KNSTD	21574900	989200	KNSTD	1995-04-07	boulder	--	--	--	32980	3250	1540		--	--	--		0.0985446
Karakax (W Kunlun)	KG1-14	36.4167	77.6641	4900	std	3	2.65	1	0	26433100	768200	KNSTD	145706800	12813800	KNSTD	1995-04-07	boulder	314140	30670	9890	303250	43300	31070		10890	53061.7	0.0346661	0.0976316	0.142786
Karakax (W Kunlun)	KG1-15	36.4232	77.6755	4940	std	3	2.65	1	0	9881900	341400	KNSTD	59997300	3134300	KNSTD	1995-04-07	boulder	109630	10380	3890	111930	11840	6180		2300	15745.8	0.0209797	0.0946821	0.10578
Karakax (W Kunlun)	KG1-5	36.4455	77.6446	5357	std	1.5	2.65	1	0	1621900	54200	KNSTD	8490300	375800	KNSTD	1995-04-07	boulder	14400	1330	480	12370	1200	550		2030	1791.34	0.140972	0.0923611	0.0970089
Karakax (W Kunlun)	KG1-6	36.4262	77.6439	4980	std	1.5	2.65	1	0	8070100	284500	KNSTD	50278300	2357600	KNSTD	1995-04-07	boulder	86320	8150	3110	90000	9170	4410		3680	12268.3	0.0426321	0.0944161	0.101889
Karakax (W Kunlun)	KG1-7	36.4262	77.6439	4980	std	2	2.65	1	0	7013700	205200	KNSTD	42906500	2085000	KNSTD	1995-04-07	boulder	75120	6910	2240	76620	7820	3870		1500	10435.5	0.0199681	0.0919862	0.102062
Karakax (W Kunlun)	KG1-8	36.4302	77.6527	5100	std	1.5	2.65	1	0	9584600	282200	KNSTD	55679300	2661300	KNSTD	1995-04-07	boulder	97370	9010	2940	94610	9700	4740		2760	13239	0.0283455	0.0925336	0.102526
Karakax (W Kunlun)	KG1-9	36.4324	77.6523	5115	std	1	2.65	1	0	7992400	211600	KNSTD	49391900	2303800	KNSTD	1995-04-07	boulder	79960	7290	2160	82530	8360	4010		2570	11092.1	0.0321411	0.0911706	0.101296
Karakax (W Kunlun)	KG2-1	36.4369	77.6822	4900	std	3.5	2.65	1	0	7225500	273000	KNSTD	46252100	4125300	KNSTD	1995-04-07	boulder	81370	7750	3140	87150	11230	8120		5780	13644.6	0.0710336	0.0952439	0.128858
Karakax (W Kunlun)	KG2-2	36.4282	77.6991	4700	std	2	2.65	0.99	0	7158500	215300	KNSTD	44230500	3965900	KNSTD	1995-04-07	boulder	88460	8190	2720	91480	11850	8580		3020	14404.8	0.0341397	0.0925842	0.129537
Karakax (W Kunlun)	KG2-3	36.4272	77.7094	4585	std	0.5	2.65	1	0	7197500	199700	KNSTD	44813300	2864300	KNSTD	1995-04-07	boulder	91950	8450	2610	95930	10730	6430		3980	13657.8	0.0432844	0.0918978	0.111852
Karakax (W Kunlun)	LIA-K-1	36.439	77.6472	5180	std	2.5	2.65	1	0	6100	26300	KNSTD	63700	78800	KNSTD	1995-04-07	boulder	60	250	250	100	130	120		40	281.78	0.666667		1.3
Karakax (W Kunlun)	LIA-K-2	36.4402	77.6473	5185	std	1.5	2.65	1	0	687600	25800	KNSTD	3934400	194200	KNSTD	1995-04-07	boulder	6570	610	250	6160	610	310		410	862.67	0.0624049	0.0928463	0.099026
Karakax (W Kunlun)	LIA-K-3	36.4399	77.6472	5195	std	2	2.65	1	0	1024100	46700	KNSTD	6460000	305800	KNSTD	1995-04-07	boulder	9790	950	450	10140	990	480		350	1372.08	0.0357508	0.0970378	0.0976331
Karakax (W Kunlun)	LIA-K-4	36.439	77.6472	5200	std	2.5	2.65	1	0	25900	4200	KNSTD	117200	13100	KNSTD	1995-04-07	boulder	250	50	40	180	30	20		70	58.3095	0.28	0.2	0.166667
Barskoon suu (W Tian Shan)	BS-001A	41.8832	77.7057	3822	std	2	2.65	1	0	16500	3400	07KNSTD	0	0	0	2011-06-10	boulder	290	70	60	--	--	--		--	--	--	0.241379
Barskoon suu (W Tian Shan)	BS-002A	41.8832	77.7057	3822	std	2	2.65	1	0	27500	5500	07KNSTD	0	0	0	2011-06-10	boulder	490	110	100	--	--	--		--	--	--	0.22449
Barskoon suu (W Tian Shan)	BS-002B	41.8832	77.7057	3822	std	2	2.65	1	0	17800	3400	07KNSTD	0	0	0	2011-06-10	boulder	320	70	60	--	--	--		--	--	--	0.21875
Barskoon suu (W Tian Shan)	BS-004A	41.8829	77.7061	3831	std	3	2.65	1	0	65800	8400	07KNSTD	0	0	0	2011-06-10	boulder	1170	180	150	--	--	--		--	--	--	0.153846
Barskoon suu (W Tian Shan)	BS-007A	41.8702	77.7341	3791	std	3	2.65	1	0	860400	22500	07KNSTD	0	0	0	2011-06-10	boulder	15730	1410	410	--	--	--		--	--	--	0.0896376
Barskoon suu (W Tian Shan)	BS-007B	41.8702	77.7341	3791	std	5	2.65	1	0	836800	20800	07KNSTD	0	0	0	2011-06-10	boulder	15550	1390	390	--	--	--		--	--	--	0.0893891
Barskoon suu (W Tian Shan)	BS-007C	41.8698	77.7356	3805	std	2	2.65	1	0	1025600	42900	07KNSTD	0	0	0	2011-06-10	boulder	18470	1760	780	--	--	--		--	--	--	0.0952897
Barskoon suu (W Tian Shan)	BS-007D	41.8698	77.7356	3805	std	1	2.65	1	0	685500	63000	07KNSTD	0	0	0	2011-06-10	boulder	12230	1540	1130	--	--	--		--	--	--	0.12592
Choktal (W Tian Shan)	CR-001A	42.7014	76.7009	3197	std	3	2.65	1	0	880900	26100	07KNSTD	0	0	0	2011-06-11	boulder	22070	2010	660	--	--	--		--	--	--	0.0910739
Choktal (W Tian Shan)	CR-001B	42.7014	76.7009	3197	std	5	2.65	1	0	923500	30600	07KNSTD	0	0	0	2011-06-11	boulder	23530	2170	780	--	--	--		--	--	--	0.0922227
Choktal (W Tian Shan)	CR-001C	42.7014	76.7009	3197	std	3	2.65	1	0	838700	24600	07KNSTD	0	0	0	2011-06-11	boulder	21010	1910	620	--	--	--		--	--	--	0.0909091
Choktal (W Tian Shan)	CR-002A	42.7497	76.6954	3574	std	3	2.65	0.98	0	12200	2800	07KNSTD	0	0	0	2011-06-12	boulder	250	60	60	--	--	--		--	--	--	0.24
Choktal (W Tian Shan)	CR-002D	42.7508	76.6951	3588	std	3	2.65	0.97	0	12500	3700	07KNSTD	0	0	0	2011-06-12	boulder	260	80	80	--	--	--		--	--	--	0.307692
Choktal (W Tian Shan)	CR-002E	42.7508	76.6951	3588	std	3	2.65	0.97	0	12000	2700	07KNSTD	0	0	0	2011-06-12	boulder	250	60	60	--	--	--		--	--	--	0.24
Choktal (W Tian Shan)	CR-003A	42.7478	76.6939	3535	std	10	2.65	0.98	0	686200	22100	07KNSTD	0	0	0	2011-06-12	boulder	15220	1390	490	--	--	--		--	--	--	0.0913272
Choktal (W Tian Shan)	CR-003C	42.7478	76.6939	3535	std	5	2.65	0.98	0	707600	21200	07KNSTD	0	0	0	2011-06-12	boulder	15080	1370	450	--	--	--		--	--	--	0.0908488
Choktal (W Tian Shan)	CR-003D	42.7471	76.6943	3534	std	5	2.65	0.98	0	739400	23300	07KNSTD	0	0	0	2011-06-12	boulder	15760	1440	500	--	--	--		--	--	--	0.0913706
Gulbel (W Tian Shan)	GP-001	42.0389	77.1242	2803	std	3	2.65	1	0	475400	39900	07KNSTD	0	0	0	2011-06-10	boulder	15380	1850	1300	--	--	--		--	--	--	0.120286
Gulbel (W Tian Shan)	GP-002A	42.0115	77.1996	3254	std	3	2.65	0.99	0	705500	21600	07KNSTD	0	0	0	2011-06-10	boulder	17570	1600	540	--	--	--		--	--	--	0.0910643
Gulbel (W Tian Shan)	GP-002C	42.0107	77.1983	3258	std	5	2.65	0.99	0	628200	28500	07KNSTD	0	0	0	2011-06-10	boulder	15860	1540	720	--	--	--		--	--	--	0.0970996
Gulbel (W Tian Shan)	GP-002D	42.0124	77.202	3208	std	3	2.65	0.99	0	662500	19900	07KNSTD	0	0	0	2011-06-10	boulder	16950	1540	510	--	--	--		--	--	--	0.0908555
Gulbel (W Tian Shan)	GP-003A	42.0143	77.1993	3265	std	3	2.65	1	0	714900	27600	07KNSTD	0	0	0	2011-06-10	boulder	17520	1650	680	--	--	--		--	--	--	0.0941781
Gulbel (W Tian Shan)	GP-003B	42.0143	77.1993	3265	std	3	2.65	1	0	669100	39900	07KNSTD	0	0	0	2011-06-10	boulder	16390	1710	980	--	--	--		--	--	--	0.104332
Gulbel (W Tian Shan)	GP-003C	42.0145	77.1982	3252	std	3	2.65	1	0	732600	18700	07KNSTD	0	0	0	2011-06-10	boulder	18090	1620	460	--	--	--		--	--	--	0.0895522
Gulbel (W Tian Shan)	GP-004A	42.0381	77.1421	3001	std	3	2.65	1	0	462400	25100	07KNSTD	0	0	0	2011-06-10	boulder	13240	1340	720	--	--	--		--	--	--	0.101208
Gulbel (W Tian Shan)	GP-004B	42.0381	77.1421	3001	std	3	2.65	1	0	1711500	78800	07KNSTD	0	0	0	2011-06-10	boulder	49440	4860	2300	--	--	--		--	--	--	0.098301
Gulbel (W Tian Shan)	GP-005	42.0383	77.1206	2781	std	1	2.65	1	0	682000	19600	07KNSTD	0	0	0	2011-06-10	boulder	22040	2000	640	--	--	--		--	--	--	0.0907441
Gulbel (W Tian Shan)	GP-006	42.0382	77.124	2798	std	2	2.65	1	0	671800	20400	07KNSTD	0	0	0	2011-06-10	boulder	21660	1970	660	--	--	--		--	--	--	0.0909511
Muzart (W Tian Shan)	CS-28	41.7857	80.9061	1978	std	4	2.65	1	0	303100	23600	KNSTD	2183200	41400	KNSTD	1992-09-22	boulder	15420	1790	1210	18240	1610	350		2820	2407.53	0.182879	0.116083	0.0882675
Muzart (W Tian Shan)	CS-30	41.7915	80.905	2011	std	4	2.65	1	0	334300	19700	KNSTD	1800300	133200	KNSTD	1992-09-22	boulder	16630	1730	980	14680	1670	1090		1950	2404.54	0.117258	0.104029	0.11376
Muzart (W Tian Shan)	CS-32	41.7747	80.9566	1889	std	4	2.65	1	0	336500	16500	KNSTD	0	0	0	1992-09-22	boulder	18240	1800	900	--	--	--		--	--	--	0.0986842
Muzart (W Tian Shan)	CS-33	41.7729	80.9587	1874	std	2	2.65	1	0	465900	75000	KNSTD	0	0	0	1992-09-22	boulder	25160	4610	4080	--	--	--		--	--	--	0.183227
Suek (W Tian Shan)	SO-CS-001	41.7082	77.8054	3432	std	3	2.65	1	0	888500	31100	07KNSTD	0	0	0	2011-06-09	boulder	19920	1850	700	--	--	--		--	--	--	0.0928715
Suek (W Tian Shan)	SO-CS-002A	41.7014	77.8105	3402	std	2	2.65	1	0	620100	25000	07KNSTD	0	0	0	2011-06-09	boulder	14010	1330	570	--	--	--		--	--	--	0.0949322
Suek (W Tian Shan)	SO-CS-002B	41.7014	77.8105	3402	std	5	2.65	1	0	933900	37000	07KNSTD	0	0	0	2011-06-09	boulder	21660	2050	860	--	--	--		--	--	--	0.0946445
Tailan (W Tian Shan)	CS-14	41.6021	80.4838	1677	std	6	2.65	1	0	97700	11200	KNSTD	463100	37000	KNSTD	1992-09-16	boulder	6270	900	720	4860	570	390		1410	1065.32	0.22488	0.143541	0.117284
Tailan (W Tian Shan)	CS-20	41.6548	80.4596	2053	std	5	2.65	1	0	262400	16000	KNSTD	1391000	86500	KNSTD	1992-09-18	boulder	12810	1350	780	11120	1180	700		1690	1793.01	0.131928	0.105386	0.106115
Tailan (W Tian Shan)	CS-24	41.6306	80.4698	1879	std	3	2.65	1	0	161600	25600	KNSTD	1160000	107500	KNSTD	1992-09-19	boulder	8760	1580	1390	10300	1310	960		1540	2052.44	0.175799	0.180365	0.127184
Tailan (W Tian Shan)	CS-27a	41.5426	80.4854	1565	std	5	2.65	1	0	95300	10500	KNSTD	361000	41400	KNSTD	1992-09-20	boulder	6590	920	730	4080	580	470		2510	1087.57	0.38088	0.139605	0.142157
10Be and 26Al ages were calculated using online calculator version 2.3 (Balco et al., 2008; http://hess.ess.washington.edu) with Borcher et al. 2016 production rate, in March of 2018.
																												0.0946821	0.102772
																												0.114463	0.133681

## Sheet: Table S4
TABLE S4. Outlier evaluation by "normalized deviation" method (Batbaatar et al., 2018)
Glacier development in continental climate regions of central Asia
Jigjidsurengiin Batbaatar, Alan R. Gillespie, Michele Koppes, Douglas H. Clark, Oliver A. Chadwick, David Fink, Ari Matmon, Summer Rupper
corresponding author email: bataa@uw.edu
									Calculations considering all samples in the group							"Normalized deviation" criteria		Revised calculations after outlier rejection
Site (Subregion)	Publication	Group-ID	Expage sample ID (http://expage.github.io)	Original sample ID	Age, xi (ka)	1σ internal uncertainty in age, σi (ka)	1σ external uncertainty in age, (ka)	(1σ ext. unc.)^2	n, number of samples within the group	µ, mean of the group (ka)	1σ st.dev of the group (ka)	1σ st.dev of the group (%)	(Xi − µ)2/σi2	χ2 = ∑ (Xi − µ)2/σi2	Rχ2 =χ2 / (n-1)	1σ normalized deviation from the excluded mean, δi	Reject if δi >2 (1 = accept; (0 = reject)	number of samples after rejection	µ , mean of the group (ka)	1σ st.dev of the group (ka)	1σ st.dev of the group (%)	1σ total uncert. of the group age (ka)	1σ total uncert. of the group age (%)	(Xi − µ)2/σi2	χ2 = ∑ (Xi − µ)2/σi2	Rχ2 =χ2 / (n-1)
Kanas (Altai)	Gribenski et al. (2018)	Grib2018-A	Grib2018-001	KC13-06	18.12	0.42	1.61	2.5921	3	18.53	0.376431	0.0203147	0.952948	1.62975	0.814874	1.34961	1	3	18.53	0.376431	0.0203147	2.88298	0.155585	No Rejection	1.62975	0.814874
	Gribenski et al. (2018)	Grib2018-A	Grib2018-002	KC13-07	18.61	0.47	1.67	2.7889	3	18.53	0.376431	0.0203147	0.0289724			0.170612	1	3	18.53					No Rejection
	Gribenski et al. (2018)	Grib2018-A	Grib2018-003	KC13-08	18.86	0.41	1.67	2.7889	3	18.53	0.376431	0.0203147	0.647829			0.922138	1	3	18.53					No Rejection
	Gribenski et al. (2018)	Grib2018-B	Grib2018-004	KC13-09	11.39	0.29	1.02	1.0404	3	17.82	5.56865	0.312495	491.616	602.241	301.12	32.7845	0	2	21.035	0.0494975	0.0023531	2.6309	0.125073	0	0.0130766	0.0130766
	Gribenski et al. (2018)	Grib2018-B	Grib2018-005	KC13-10	21	0.46	1.86	3.4596	3	17.82	5.56865	0.312495	47.7902			0.695312	1	2	21.035					0.00578922
	Gribenski et al. (2018)	Grib2018-B	Grib2018-006	KC13-13	21.07	0.41	1.86	3.4596	3	17.82	5.56865	0.312495	62.8346			0.716106	1	2	21.035					0.00728733
	Gribenski et al. (2018)	Grib2018-C	Grib2018-007	KC13-27	246.82	3.42	22.68	514.382	3	105.577	123.018	1.1652	1705.63	44076.8	22038.4	11.2584	0	2	34.955	18.505	0.529394	19.0824	0.545913	0	1157.5	1157.5
	Gribenski et al. (2018)	Grib2018-C	Grib2018-008	KC13-28	48.04	0.86	4.24	17.9776	3	105.577	123.018	1.1652	4476.02			0.542574	1	2	34.955					231.5
	Gribenski et al. (2018)	Grib2018-C	Grib2018-009	KC13-29	21.87	0.43	1.93	3.7249	3	105.577	123.018	1.1652	37895.1			0.893288	1	2	34.955					925.999
	Gribenski et al. (2018)	Grib2018-D	Grib2018-010	KC13-22	69.6	0.81	6.1	37.21	3	50.1	28.971	0.578264	579.561	4488.67	2244.34	0.878367	1	2	66.745	4.03758	0.0604926	9.21868	0.138118	12.4234	22.949	22.949
	Gribenski et al. (2018)	Grib2018-D	Grib2018-011	KC13-23	16.81	0.55	1.54	2.3716	3	50.1	28.971	0.578264	3663.55			12.2544	0	2	66.745					0
	Gribenski et al. (2018)	Grib2018-D	Grib2018-012	KC13-25	63.89	0.88	5.61	31.4721	3	50.1	28.971	0.578264	245.563			0.553985	1	2	66.745					10.5256
Chagan Uzun (Altai)	Reuther (2007)	Reu2007-C	Reu2007-004	AK-03-02	15.34	0.62	1.45	2.1025	3	15.6333	0.329596	0.0210829	0.223841	0.376346	0.188173	0.640038	1	3	15.6333	0.329596	0.0210829	2.73767	0.175117	No Rejection	0.376346	0.188173
	Reuther (2007)	Reu2007-C	Reu2007-005	AK-03-03	15.99	0.93	1.66	2.7556	3	15.6333	0.329596	0.0210829	0.147082			0.566669	1	3	15.6333					No Rejection
	Reuther (2007)	Reu2007-C	Reu2007-006	AK-03-04	15.57	0.86	1.59	2.5281	3	15.6333	0.329596	0.0210829	0.00542335			0.0974244	1	3	15.6333					No Rejection
	Reuther (2007)	Reu2007-E	Reu2007-008	CHU-03-01	19.82	2.99	3.44	11.8336	3	20.8533	3.71927	0.178354	0.119437	16.2687	8.13436	0.261982	1	3	20.8533	3.71927	0.178354	6.88916	0.330363	No Rejection	16.2687	8.13436
	Reuther (2007)	Reu2007-E	Reu2007-009	CHU-03-03	24.98	3.77	4.34	18.8356	3	20.8533	3.71927	0.178354	1.19816			1.53156	1	3	20.8533					No Rejection
	Reuther (2007)	Reu2007-E	Reu2007-010	CHU-03-04	17.76	0.8	1.72	2.9584	3	20.8533	3.71927	0.178354	14.9511			1.24219	1	3	20.8533					No Rejection
	Gribenski et al. (2016)	Grib2016-A	Grib2016-001	AL13C-30	19.35	0.26	1.68	2.8224	3	20.79	3.01045	0.144803	30.6746	155.133	77.5664	0.556177	1	2	19.06	0.410122	0.0215174	2.42499	0.12723	1.24408	1.54348	1.54348
	Gribenski et al. (2016)	Grib2016-A	Grib2016-002	AL13C-31	18.77	0.53	1.7	2.89	3	20.79	3.01045	0.144803	14.5262			0.864449	1	2	19.06					0.299395
	Gribenski et al. (2016)	Grib2016-A	Grib2016-003	AL13C-32	24.25	0.33	2.11	4.4521	3	20.79	3.01045	0.144803	109.932			9.85937	0	2	19.06					0
	Gribenski et al. (2016)	Grib2016-C	Grib2016-006	AL13C-26	17.39	0.23	1.51	2.2801	4	18.3025	0.827058	0.0451883	15.7402	23.6858	7.89528	1.68103	1	4	18.3025	0.827058	0.0451883	3.30851	0.180768	No Rejection	23.6858	7.89528
	Gribenski et al. (2016)	Grib2016-C	Grib2016-007	AL13C-27	17.98	0.24	1.56	2.4336	4	18.3025	0.827058	0.0451883	1.80566			0.426958	1	4	18.3025					No Rejection
	Gribenski et al. (2016)	Grib2016-C	Grib2016-008	AL13C-28	19.34	0.43	1.71	2.9241	4	18.3025	0.827058	0.0451883	5.82156			1.9695	1	4	18.3025					No Rejection
	Gribenski et al. (2016)	Grib2016-C	Grib2016-009	AL13C-29	18.5	0.35	1.62	2.6244	4	18.3025	0.827058	0.0451883	0.318418			0.248546	1	4	18.3025					No Rejection
	Gribenski et al. (2016)	Grib2016-D	Grib2016-010	AL14C-01	20.55	0.29	1.79	3.2041	4	19.35	1.22711	0.0634166	17.1225	51.3158	17.1053	1.36063	1	4	19.35	1.22711	0.0634166	3.60028	0.186061	No Rejection	51.3158	17.1053
	Gribenski et al. (2016)	Grib2016-D	Grib2016-011	AL14C-02	20.18	0.3	1.76	3.0976	4	19.35	1.22711	0.0634166	7.65444			0.805102	1	4	19.35					No Rejection
	Gribenski et al. (2016)	Grib2016-D	Grib2016-012	AL14C-03	17.93	0.3	1.57	2.4649	4	19.35	1.22711	0.0634166	22.4044			1.88915	1	4	19.35					No Rejection
	Gribenski et al. (2016)	Grib2016-D	Grib2016-013	AL14C-04	18.74	0.3	1.64	2.6896	4	19.35	1.22711	0.0634166	4.13444			0.561169	1	4	19.35					No Rejection
	Gribenski et al. (2016)	Grib2016-E	Grib2016-014	AL13C-35	19.13	0.33	1.67	2.7889	5	21.994	7.37964	0.33553	75.3214	1229.14	307.284	0.430037	1	4	18.77	1.82145	0.0970403	3.8082	0.202887	1.19008	52.974	17.658
	Gribenski et al. (2016)	Grib2016-E	Grib2016-015	AL13C-36	21.2	0.42	1.87	3.4969	5	21.994	7.37964	0.33553	3.5739			0.116542	1	4	18.77					33.4745
	Gribenski et al. (2016)	Grib2016-E	Grib2016-016	AL13C-37	34.89	0.42	3.03	9.1809	5	21.994	7.37964	0.33553	942.782			8.62382	0	4	18.77					0
	Gribenski et al. (2016)	Grib2016-E	Grib2016-017	AL13C-38	17.49	0.39	1.55	2.4025	5	21.994	7.37964	0.33553	133.373			0.702042	1	4	18.77					10.7719
	Gribenski et al. (2016)	Grib2016-E	Grib2016-018	AL13C-39	17.26	0.55	1.58	2.4964	5	21.994	7.37964	0.33553	74.0851			0.742145	1	4	18.77					7.53752
Diehanjelegou (E Tian Shan)	This study	Diehanjelegou-B		XCS-103	55.69	1.85	5.16	26.6256	4	37.8725	14.0658	0.371398	92.7577	460.693	153.564	2.52461	0	3	31.9333	9.2264	0.288927	10.8035	0.338313	0	137.93	68.9649
	This study	Diehanjelegou-B		XCS-104	29.98	1.64	3.06	9.3636	4	37.8725	14.0658	0.371398	23.1602			0.655242	1	3	31.9333					1.41862
	This study	Diehanjelegou-B		XCS-105	41.98	2.09	4.18	17.4724	4	37.8725	14.0658	0.371398	3.86245			0.321662	1	3	31.9333					23.1074
	This study	Diehanjelegou-B		XCS-106	23.84	0.76	2.18	4.7524	4	37.8725	14.0658	0.371398	340.912			1.45186	1	3	31.9333					113.404
Alashanje (E Tian Shan)	Li et al. (2014)	Li2014-A	Li2014-001	AR-10-001	201.77	5.18	18.85	355.323	5	57.172	81.6555	1.42824	779.229	100610	25152.4	12.6212	0	4	21.0225	13.3513	0.635097	14.0783	0.669679	0	8447.21	2815.74
	Li et al. (2014)	Li2014-A	Li2014-002	AR-10-002	28.77	1.52	2.9	8.41	5	57.172	81.6555	1.42824	349.149			0.383808	1	4	21.0225					25.9798
	Li et al. (2014)	Li2014-A	Li2014-003	AR-10-003	4.15	0.19	0.4	0.16	5	57.172	81.6555	1.42824	77876.2			0.754381	1	4	21.0225					7885.91
	Li et al. (2014)	Li2014-A	Li2014-004	AR-10-004	16.97	0.28	1.48	2.1904	5	57.172	81.6555	1.42824	20614.8			0.554377	1	4	21.0225					209.474
	Li et al. (2014)	Li2014-A	Li2014-005	AR-10-005	34.2	0.73	3.03	9.1809	5	57.172	81.6555	1.42824	990.266			0.308375	1	4	21.0225					325.852
	Li et al. (2014)	Li2014-B	Li2014-007	AR-10-022	31.36	0.78	2.81	7.8961	3	22.11	8.82604	0.399187	140.635	516.711	258.356	2.61921	0	2	17.485	5.23966	0.299666	5.78012	0.330576	0	87.1793	87.1793
	Li et al. (2014)	Li2014-B	Li2014-008	AR-10-023	21.19	1.03	2.09	4.3681	3	22.11	8.82604	0.399187	0.797813			0.110634	1	2	17.485					12.939
	Li et al. (2014)	Li2014-B	Li2014-009	AR-10-024	13.78	0.43	1.26	1.5876	3	22.11	8.82604	0.399187	375.278			1.73442	1	2	17.485					74.2403
	Li et al. (2014)	Li2014-D	Li2014-014	AR-10-014	22.74	0.68	2.07	4.2849	5	29.182	7.83941	0.268639	89.7478	387.232	96.8081	0.997924	1	4	25.7875	2.26369	0.0877824	5.16369	0.20024	20.0849	32.6923	10.8974
	Li et al. (2014)	Li2014-D	Li2014-015	AR-10-015	25.63	0.65	2.3	5.29	5	29.182	7.83941	0.268639	29.862			0.505633	1	4	25.7875					0.058713
	Li et al. (2014)	Li2014-D	Li2014-016	AR-10-016	28.07	0.71	2.51	6.3001	5	29.182	7.83941	0.268639	2.45297			0.153565	1	4	25.7875					10.3349
	Li et al. (2014)	Li2014-D	Li2014-017	AR-10-017	26.71	0.62	2.38	5.6644	5	29.182	7.83941	0.268639	15.8969			0.345948	1	4	25.7875					2.21386
	Li et al. (2014)	Li2014-D	Li2014-018	AR-10-018	42.76	0.86	3.79	0	5	29.182	7.83941	0.268639	249.273			7.00895	0	4	25.7875					0
	Li et al. (2014)	Li2014-E	Li2014-021	ARL-10-001	54.71	1.15	4.87	23.7169	7	52.5986	16.2985	0.309866	3.37099	849.826	141.638	0.137909	1	6	46.8417	6.35434	0.135656	12.3201	0.263016	46.8134	119.379	23.8758
	Li et al. (2014)	Li2014-E	Li2014-022	ARL-10-002	47.03	1.23	4.24	17.9776	7	52.5986	16.2985	0.309866	20.4964			0.367185	1	6	46.8417					0.0234447
	Li et al. (2014)	Li2014-E	Li2014-023	ARL-10-003	49.75	1.11	4.44	19.7136	7	52.5986	16.2985	0.309866	6.5858			0.186331	1	6	46.8417					6.86503
	Li et al. (2014)	Li2014-E	Li2014-024	ARL-10-004	40.83	0.94	3.64	13.2496	7	52.5986	16.2985	0.309866	156.744			0.809981	1	6	46.8417					40.901
	Li et al. (2014)	Li2014-E	Li2014-025	ARL-10-005	50.81	1.34	4.59	21.0681	7	52.5986	16.2985	0.309866	1.78157			0.116681	1	6	46.8417					8.77014
	Li et al. (2014)	Li2014-E	Li2014-026	KXN-10-022	87.14	1.39	7.73	59.7529	7	52.5986	16.2985	0.309866	617.52			6.19536	0	6	46.8417					0
	Li et al. (2014)	Li2014-E	Li2014-027	KXN-10-024	37.92	2.23	3.96	15.6816	7	52.5986	16.2985	0.309866	43.3269			1.03556	1	6	46.8417					16.006
	Li et al. (2014)	Li2014-F	Li2014-028	ARL-10-006	72.02	0.92	6.33	40.0689	3	68.9833	13.0331	0.188931	10.8948	380.334	190.167	0.251993	1	2	76.125	5.80535	0.0762607	11.1884	0.146974	19.9091	26.6592	26.6592
	Li et al. (2014)	Li2014-F	Li2014-029	ARL-10-007	54.7	0.8	4.8	23.04	3	68.9833	13.0331	0.188931	318.771			3.65601	0	2	76.125					0
	Li et al. (2014)	Li2014-F	Li2014-030	ARL-10-008	80.23	1.58	7.17	51.4089	3	68.9833	13.0331	0.188931	50.668			1.36615	1	2	76.125					6.75013
Daxigou (E Tian Shan)	This study	Li2011-D		CS-11b	23.18	0.95	2.21	4.8841	4	20.2975	2.25294	0.110996	9.20643	21.2765	7.09216	2.22753	0	3	19.3367	1.44029	0.0744849	3.5675	0.184494	0	6.59889	3.29944
	This study	Li2011-D		CS-12a	19.37	1.02	1.95	3.8025	4	20.2975	2.25294	0.110996	0.826851			0.435043	1	3	19.3367					0.00106797
	Li et al. (2011)	Li2011-D	Li2011-006	07-28	20.76	0.88	1.99	3.9601	4	20.2975	2.25294	0.110996	0.276222			0.214755	1	3	19.3367					2.61606
	Li et al. (2011)	Li2011-D	Li2011-007	07-29	17.88	0.73	1.7	2.89	4	20.2975	2.25294	0.110996	10.967			1.56349	1	3	19.3367					3.98176
	Li et al. (2011)	Li2011-E	Li2011-008	07-35	16.88	0.28	1.47	2.1609	6	17.44	1.39106	0.0797625	4	43.3513	8.67027	0.433492	1	6	17.44	1.39106	0.0797625	4.15505	0.238248	No Rejection	43.3513	8.67027
	Li et al. (2011)	Li2011-E	Li2011-009	07-36	18.98	0.34	1.66	2.7556	6	17.44	1.39106	0.0797625	20.5156			1.36873	1	6	17.44					No Rejection
	Li et al. (2011)	Li2011-E	Li2011-010	07-37	18.26	0.47	1.64	2.6896	6	17.44	1.39106	0.0797625	3.04391			0.630202	1	6	17.44					No Rejection
	Li et al. (2011)	Li2011-E	Li2011-011	07-38	16.56	0.37	1.47	2.1609	6	17.44	1.39106	0.0797625	5.65668			0.692793	1	6	17.44					No Rejection
	This study	Li2011-E		CS-10	15.38	0.71	1.5	2.25	6	17.44	1.39106	0.0797625	8.41817			1.92455	1	6	17.44					No Rejection
	This study	Li2011-E		CS-8	18.58	0.87	1.82	3.3124	6	17.44	1.39106	0.0797625	1.717			0.819614	1	6	17.44					No Rejection
	Kong et al. (2009)	Kong2009a-A	Kong2009a-001	TB1	11.12	0.71	1.19	1.4161	5	17.906	4.8978	0.273528	91.3505	122.564	30.641	2.32583	0	4	19.6025	3.57731	0.182493	5.39475	0.275207	0	40.4794	13.4931
	Kong et al. (2009)	Kong2009a-A	Kong2009a-002	TB2	16.84	0.78	1.64	2.6896	5	17.906	4.8978	0.273528	1.86778			0.235116	1	4	19.6025					12.5434
	Kong et al. (2009)	Kong2009a-A	Kong2009a-003	TB3	20.77	1.35	2.23	4.9729	5	17.906	4.8978	0.273528	4.50068			0.649415	1	4	19.6025					0.747905
	Kong et al. (2009)	Kong2009a-A	Kong2009a-004	TB4	24.15	1.33	2.46	6.0516	5	17.906	4.8978	0.273528	22.0406			1.86529	1	4	19.6025					11.6907
	This study	Kong2009a-A		CS-7b	16.65	0.75	1.61	2.5921	5	17.906	4.8978	0.273528	2.80451			0.278019	1	4	19.6025					15.4973
	Kong et al. (2009)	Kong2009a-B	Kong2009a-005	TB5	17.67	0.44	1.58	2.4964	3	16.8967	0.818189	0.0484231	3.08907	3.93021	1.96511	1.45524	1	3	16.8967	0.818189	0.0484231	2.95133	0.174669	No Rejection	3.93021	1.96511
	Kong et al. (2009)	Kong2009a-B	Kong2009a-006	TB7	16.98	0.81	1.66	2.7556	3	16.8967	0.818189	0.0484231	0.0105844			0.0887317	1	3	16.8967					No Rejection
	Kong et al. (2009)	Kong2009a-B	Kong2009a-007	TB8	16.04	0.94	1.67	2.7889	3	16.8967	0.818189	0.0484231	0.830554			1.21332	1	3	16.8967					No Rejection
	Kong et al. (2009)	Kong2009a-C	Kong2009a-008	TD2	23.37	1.02	2.25	5.0625	3	19.59	3.27616	0.167236	13.7336	32.7607	16.3804	5.47067	0	2	17.7	0.183848	0.0103869	2.45387	0.138637	0	0.0823611	0.0823611
	Kong et al. (2009)	Kong2009a-C	Kong2009a-009	TD5	17.83	1.07	1.86	3.4596	3	19.59	3.27616	0.167236	2.70556			0.622862	1	2	17.7					0.0147611
	Kong et al. (2009)	Kong2009a-C	Kong2009a-010	TD6	17.57	0.5	1.59	2.5281	3	19.59	3.27616	0.167236	16.3216			0.767253	1	2	17.7					0.0676
	Kong et al. (2009)	Kong2009a-D	Kong2009a-011	TA1	11.62	0.85	1.31	1.7161	5	11.714	4.75366	0.405811	0.0122298	111.041	27.7602	0.0211553	1	4	9.85	2.63941	0.26796	3.59594	0.36507	4.33619	49.8881	16.6294
	Kong et al. (2009)	Kong2009a-D	Kong2009a-012	TA2	5.96	0.6	0.79	0.6241	5	11.714	4.75366	0.405811	91.9681			1.76032	1	4	9.85					42.0336
	Kong et al. (2009)	Kong2009a-D	Kong2009a-013	TA4	19.17	1.78	2.42	5.8564	5	11.714	4.75366	0.405811	17.5457			2.92757	0	4	9.85					0
	Kong et al. (2009)	Kong2009a-D	Kong2009a-014	TA6	10.47	1.08	1.4	1.96	5	11.714	4.75366	0.405811	1.32676			0.28087	1	4	9.85					0.329561
	Kong et al. (2009)	Kong2009a-D	Kong2009a-015	TA10	11.35	0.84	1.29	1.6641	5	11.714	4.75366	0.405811	0.187778			0.0820117	1	4	9.85					3.18878
	This study	Li2014-I		CS-5	0.35	0.19	0.2	0.04	9	0.464444	0.393513	0.847278	0.362812	302.524	37.8154	0.280309	1	8	0.33625	0.0891127	0.265019	0.290243	0.863177	0.00523719	65.7687	9.39553
	This study	Li2014-I		CS-6	1.49	0.22	0.25	0.0625	9	0.464444	0.393513	0.847278	21.7307			4.8607	0	8	0.33625					0
	Li et al. (2014)	Li2014-I	Li2014-042	1--10-18	0.32	0.03	0.04	0.0016	9	0.464444	0.393513	0.847278	23.1824			0.388982	1	8	0.33625					0.293403
	Li et al. (2014)	Li2014-I	Li2014-043	1--10-19	0.38	0.03	0.05	0.0025	9	0.464444	0.393513	0.847278	7.92318			0.22598	1	8	0.33625					2.12674
	Li et al. (2014)	Li2014-I	Li2014-044	1--10-20	0.36	0.08	0.09	0.0081	9	0.464444	0.393513	0.847278	1.70448			0.275711	1	8	0.33625					0.0881348
	Li et al. (2014)	Li2014-I	Li2014-045	1--10-21	0.35	0.04	0.05	0.0025	9	0.464444	0.393513	0.847278	8.18596			0.306487	1	8	0.33625					0.118164
	Li et al. (2016)	Li2014-I	Li2016-029	WY-12-21	0.25	0.03	0.04	0.0016	9	0.464444	0.393513	0.847278	51.096			0.584286	1	8	0.33625					8.26562
	Li et al. (2016)	Li2014-I	Li2016-030	WY-12-22	0.49	0.13	0.14	0.0196	9	0.464444	0.393513	0.847278	0.0386442			0.0653123	1	8	0.33625					1.39876
	Li et al. (2016)	Li2014-I	Li2016-031	WY-12-23	0.19	0.02	0.02	0.0004	9	0.464444	0.393513	0.847278	188.299			0.75947	1	8	0.33625					53.4727
Takelekete (W Tian Shan)	Zhang et al. (2016)	Zhan2016a-B	Zhan2016a-003	BY-08-1	77.41	1.31	6.86	47.0596	8	55.1387	14.5948	0.264693	289.032	893.316	127.617	2.0395	0	7	51.9571	12.411	0.23887	17.8644	0.343829	0	477.828	79.638
	Zhang et al. (2016)	Zhan2016a-B	Zhan2016a-004	BY-08-2	35.46	1.25	3.3	10.89	8	55.1387	14.5948	0.264693	247.842			1.69375	1	7	51.9571					174.18
	Zhang et al. (2016)	Zhan2016a-B	Zhan2016a-005	BY-08-3	55.13	1.65	5.05	25.5025	8	55.1387	14.5948	0.264693	2.81221e-05			0.000630901	1	7	51.9571					3.69771
	Zhang et al. (2016)	Zhan2016a-B	Zhan2016a-006	BY-08-6	70.14	1.88	6.38	40.7044	8	55.1387	14.5948	0.264693	63.6706			1.18538	1	7	51.9571					93.5424
	Zhang et al. (2016)	Zhan2016a-B	Zhan2016a-007	BY-08-7	43.26	1.67	4.09	16.7281	8	55.1387	14.5948	0.264693	50.5951			0.906211	1	7	51.9571					27.1219
	Zhang et al. (2016)	Zhan2016a-B	Zhan2016a-008	BY-08-8	56.95	1.34	5.11	26.1121	8	55.1387	14.5948	0.264693	1.82704			0.131002	1	7	51.9571					13.8832
	Zhang et al. (2016)	Zhan2016a-B	Zhan2016a-009	BY-08-11	61.63	1.77	5.63	31.6969	8	55.1387	14.5948	0.264693	13.4496			0.475298	1	7	51.9571					29.865
	Zhang et al. (2016)	Zhan2016a-B	Zhan2016a-010	BY-08-12	41.13	0.93	3.67	13.4689	8	55.1387	14.5948	0.264693	226.899			1.09958	1	7	51.9571					135.538
Tailan (W Tian Shan)	Hubert-Ferrari et al. (2005)	Hube2005-A	Hube2005-001	M-1	13.08	0.47	1.21	1.4641	10	16.93	3.8609	0.228051	67.1005	719.968	79.9965	1.10703	1	9	17.6611	3.27971	0.185702	5.88916	0.333454	95.0049	358.573	44.8216
	Hubert-Ferrari et al. (2005)	Hube2005-A	Hube2005-002	M-2	18.15	0.76	1.73	2.9929	10	16.93	3.8609	0.228051	2.57687			0.327418	1	9	17.6611					0.413803
	Hubert-Ferrari et al. (2005)	Hube2005-A	Hube2005-003	M-3	16.72	0.48	1.51	2.2801	10	16.93	3.8609	0.228051	0.191406			0.0566013	1	9	17.6611					3.84414
	Hubert-Ferrari et al. (2005)	Hube2005-A	Hube2005-004	M-24	18.95	0.49	1.7	2.89	10	16.93	3.8609	0.228051	16.9946			0.553496	1	9	17.6611					6.91893
	Hubert-Ferrari et al. (2005)	Hube2005-A	Hube2005-005	M-25	19.45	0.58	1.77	3.1329	10	16.93	3.8609	0.228051	18.8775			0.695144	1	9	17.6611					9.51285
	Hubert-Ferrari et al. (2005)	Hube2005-A	Hube2005-006	M-26	17.11	0.47	1.54	2.3716	10	16.93	3.8609	0.228051	0.146673			0.0485267	1	9	17.6611					1.37494
	Hubert-Ferrari et al. (2005)	Hube2005-A	Hube2005-007	M-27	12.39	0.43	1.14	1.2996	10	16.93	3.8609	0.228051	111.474			1.34377	1	9	17.6611					150.268
	Hubert-Ferrari et al. (2005)	Hube2005-A	Hube2005-008	M-28	22.16	0.59	1.99	3.9601	10	16.93	3.8609	0.228051	78.5777			1.5923	1	9	17.6611					58.1442
	Hubert-Ferrari et al. (2005)	Hube2005-A	Hube2005-009	M-29	10.35	0.34	0.95	0.9025	10	16.93	3.8609	0.228051	374.536			2.21731	0	9	17.6611					0
	Hubert-Ferrari et al. (2005)	Hube2005-A	Hube2005-010	M-30	20.94	0.57	1.88	3.5344	10	16.93	3.8609	0.228051	49.4925			1.15577	1	9	17.6611					33.0905
Inylchek (W Tian Shan)	Lifton et al. (2014)	Lift2014-A	Lift2014-001	INK-01	16.66	0.8	1.64	2.6896	5	28.788	9.33786	0.324366	229.826	615.357	153.839	2.03286	0	4	31.82	7.41445	0.233012	9.38816	0.295039	0	374.789	124.93
	Lifton et al. (2014)	Lift2014-A	Lift2014-002	INK-01B	33.13	0.76	2.95	8.7025	5	28.788	9.33786	0.324366	32.6402			0.519901	1	4	31.82					2.97109
	Lifton et al. (2014)	Lift2014-A	Lift2014-003	INK-02	40.01	0.8	3.54	12.5316	5	28.788	9.33786	0.324366	196.771			1.74759	1	4	31.82					104.806
	Lifton et al. (2014)	Lift2014-A	Lift2014-004	TS12-IN-07	32.12	0.62	2.83	8.0089	5	28.788	9.33786	0.324366	28.882			0.393521	1	4	31.82					0.234131
	Lifton et al. (2014)	Lift2014-A	Lift2014-005	TS12-IN-11	22.02	0.6	1.98	3.9204	5	28.788	9.33786	0.324366	127.238			0.856623	1	4	31.82					266.778
	Lifton et al. (2014)	Lift2014-E	Lift2014-010	TS12-IN-01	37.94	1.58	3.63	13.1769	5	43.358	30.1079	0.694402	11.7588	5677.94	1419.49	0.195594	1	5	43.358	30.1079	0.694402	31.8632	0.734887	No Rejection	5677.94	1419.49
	Lifton et al. (2014)	Lift2014-E	Lift2014-011	TS12-IN-02	80.82	2.49	7.47	55.8009	5	43.358	30.1079	0.694402	226.351			1.86551	1	5	43.358					No Rejection
	Lifton et al. (2014)	Lift2014-E	Lift2014-012	TS12-IN-03	67.8	1.04	5.98	35.7604	5	43.358	30.1079	0.694402	552.34			0.985665	1	5	43.358					No Rejection
	Lifton et al. (2014)	Lift2014-E	Lift2014-013	TS12-IN-04	15.58	0.67	1.49	2.2201	5	43.358	30.1079	0.694402	1718.91			1.16548	1	5	43.358					No Rejection
	Lifton et al. (2014)	Lift2014-E	Lift2014-014	TS12-IN-05	14.65	0.51	1.35	1.8225	5	43.358	30.1079	0.694402	3168.59			1.21977	1	5	43.358					No Rejection
	Lifton et al. (2014)	Lift2014-I	Lift2014-019	SJ-Q1-1	167.78	4.86	15.71	246.804	3	104.007	74.9312	0.720446	172.189	3504.88	1752.44	1.33267	1	2	145.27	31.8339	0.219136	39.2611	0.270263	21.4525	24.5307	24.5307
	Lifton et al. (2014)	Lift2014-I	Lift2014-020	SJ-Q1-4	122.76	12.83	16.77	281.233	3	104.007	74.9312	0.720446	2.1365			0.269852	1	2	145.27					3.07821
	Lifton et al. (2014)	Lift2014-I	Lift2014-021	SJ-Q1-5	21.48	1.43	2.33	5.4289	3	104.007	74.9312	0.720446	3330.55			3.8847	0	2	145.27					0
Choktal (W Tian Shan)	This study	Choktal river-A		CR-001A	22.07	0.66	2.01	4.0401	3	22.2033	1.26528	0.056986	0.0408122	6.63831	3.31915	0.105251	1	3	22.2033	1.26528	0.056986	3.74139	0.168506	No Rejection	6.63831	3.31915
	This study	Choktal river-A		CR-001B	23.53	0.78	2.17	4.7089	3	22.2033	1.26528	0.056986	2.89291			1.8396	1	3	22.2033					No Rejection
	This study	Choktal river-A		CR-001C	21.01	0.62	1.91	3.6481	3	22.2033	1.26528	0.056986	3.70459			1.48641	1	3	22.2033					No Rejection
	This study	Choktal river-B		CR-003A	15.22	0.49	1.39	1.9321	3	15.3533	0.359073	0.0233873	0.0740432	1.1045	0.552249	0.291327	1	3	15.3533	0.359073	0.0233873	2.45184	0.159694	No Rejection	1.1045	0.552249
	This study	Choktal river-B		CR-003C	15.08	0.45	1.37	1.8769	3	15.3533	0.359073	0.0233873	0.368944			0.694716	1	3	15.3533					No Rejection
	This study	Choktal river-B		CR-003D	15.76	0.5	1.44	2.0736	3	15.3533	0.359073	0.0233873	0.661511			1.19677	1	3	15.3533					No Rejection
	This study	Choktal river-C		CR-002A	0.25	0.06	0.06	0.0036	3	0.253333	0.0057735	0.0227901	0.00308642	0.0131173	0.00655864	0.0827606	1	3	0.253333	0.0057735	0.0227901	0.116762	0.460902	No Rejection	0.0131173	0.00655864
	This study	Choktal river-C		CR-002D	0.26	0.08	0.08	0.0064	3	0.253333	0.0057735	0.0227901	0.00694444			0.125	1	3	0.253333					No Rejection
	This study	Choktal river-C		CR-002E	0.25	0.06	0.06	0.0036	3	0.253333	0.0057735	0.0227901	0.00308642			0.0827606	1	3	0.253333					No Rejection
Barskoon & Suek (W Tian Shan)	Blomdin et al. (2016)	Blom-A	Blom-001	TS-C-12-008	97.63	1.66	8.7	75.69	5	82.806	16.3767	0.197772	79.7471	898.403	224.601	1.13024	1	4	89.4875	7.74458	0.0865437	17.7458	0.198305	24.0602	86.8155	28.9385
	Blomdin et al. (2016)	Blom-A	Blom-002	TS-C-12-010	93.85	1.54	8.35	69.7225	5	82.806	16.3767	0.197772	51.4294			0.785154	1	4	89.4875					8.02471
	Blomdin et al. (2016)	Blom-A	Blom-003	TS-C-12-009	86.1	1.55	7.67	58.8289	5	82.806	16.3767	0.197772	4.51631			0.218388	1	4	89.4875					4.77634
	Blomdin et al. (2016)	Blom-A	Blom-004	TS-C-12-007	80.37	1.29	7.12	50.6944	5	82.806	16.3767	0.197772	3.56595			0.161207	1	4	89.4875					49.9542
	Blomdin et al. (2016)	Blom-A	Blom-005	TS-C-12-011	56.08	0.97	4.65	21.6225	5	82.806	16.3767	0.197772	759.145			4.28022	0	4	89.4875					0
	Blomdin et al. (2016)	Blom-B	Blom-006	TS-C-12-037	44.85	0.67	3.93	15.4449	3	32.1067	12.2449	0.381382	361.757	1137.46	568.731	2.53775	0	2	25.735	7.5024	0.291525	8.19076	0.318273	0	228.25	228.25
	Blomdin et al. (2016)	Blom-B	Blom-007	TS-C-12-035	31.04	0.64	2.75	7.5625	3	32.1067	12.2449	0.381382	2.77778			0.0925958	1	2	25.735					68.7086
	Blomdin et al. (2016)	Blom-B	Blom-008	TS-C-12-036	20.43	0.42	1.8	3.24	3	32.1067	12.2449	0.381382	772.928			1.79197	1	2	25.735					159.541
	Blomdin et al. (2016)	Blom-C	Blom-009	TS-C-12-020	26.69	0.82	2.44	5.9536	4	19.375	5.98795	0.309055	79.5795	295.021	98.3402	2.25047	0	3	16.9367	4.25564	0.251268	5.11389	0.301942	0	101.969	50.9843
	Blomdin et al. (2016)	Blom-C	Blom-010	TS-C-12-019	20.93	0.95	2.03	4.1209	4	19.375	5.98795	0.309055	2.67925			0.284596	1	3	16.9367					17.6695
	Blomdin et al. (2016)	Blom-C	Blom-011	TS-C-12-022	17.42	0.53	1.59	2.5281	4	19.375	5.98795	0.309055	13.6064			0.363173	1	3	16.9367					0.831652
	Blomdin et al. (2016)	Blom-C	Blom-012	TS-C-12-021	12.46	0.49	1.18	1.3924	4	19.375	5.98795	0.309055	199.155			1.95926	1	3	16.9367					83.4675
	Blomdin et al. (2016)	Blom-D	Blom-013	TS-C-12-026	16.01	0.26	1.4	1.96	3	13.81	2.47516	0.179229	71.5976	152.324	76.1618	1.46697	1	2	15.15	1.21622	0.0802788	2.27631	0.150252	10.9408	13.8992	13.8992
	Blomdin et al. (2016)	Blom-D	Blom-014	TS-C-12-023	14.29	0.5	1.32	1.7424	3	13.81	2.47516	0.179229	0.9216			0.206498	1	2	15.15					2.9584
	Blomdin et al. (2016)	Blom-D	Blom-015	TS-C-12-025	11.13	0.3	1	1	3	13.81	2.47516	0.179229	79.8044			3.20913	0	2	15.15					0
	This study	Suek-A		SO-CS-001	19.92	0.7	1.85	3.4225	3	18.53	4.00995	0.216403	3.94306	80.0714	40.0357	0.382255	1	2	20.79	1.23037	0.0591807	3.02304	0.145409	1.54469	2.56808	2.56808
	This study	Suek-A		SO-CS-002A	14.01	0.57	1.33	1.7689	3	18.53	4.00995	0.216403	62.8821			5.00005	0	2	20.79					0
	This study	Suek-A		SO-CS-002B	21.66	0.86	2.05	4.2025	3	18.53	4.00995	0.216403	13.2462			1.10041	1	2	20.79					1.02339
	This study	Barskoon Suu-A		BS-007A	15.73	0.41	1.41	1.9881	4	15.495	2.55402	0.164829	0.328525	23.2443	7.7481	0.0995043	1	3	16.5833	1.63638	0.0986761	3.11377	0.187765	4.33181	17.2027	8.60133
	This study	Barskoon Suu-A		BS-007B	15.55	0.39	1.39	1.9321	4	15.495	2.55402	0.164829	0.0198882			0.0232662	1	3	16.5833					7.02024
	This study	Barskoon Suu-A		BS-007C	18.47	0.78	1.76	3.0976	4	15.495	2.55402	0.164829	14.5474			1.87146	1	3	16.5833					5.85061
	This study	Barskoon Suu-A		BS-007D	12.23	1.13	1.54	2.3716	4	15.495	2.55402	0.164829	8.34852			2.18912	0	3	16.5833					0
	This study	Barskoon Suu-C		BS-001A	0.29	0.06	0.07	0.0049	3	0.366667	0.107858	0.294158	1.63272	3.75877	1.87938	0.855971	1	3	0.366667	0.107858	0.294158	0.183121	0.499421	No Rejection	3.75877	1.87938
	This study	Barskoon Suu-C		BS-002A	0.49	0.1	0.11	0.0121	3	0.366667	0.107858	0.294158	1.52111			1.80973	1	3	0.366667					No Rejection
	This study	Barskoon Suu-C		BS-002B	0.32	0.06	0.07	0.0049	3	0.366667	0.107858	0.294158	0.604938			0.455661	1	3	0.366667					No Rejection
Gulbel (W Tian Shan)	This study	Gulbel pass-A		GP-001	15.38	1.3	1.85	3.4225	3	19.6933	3.74029	0.189926	11.0088	33.3324	16.6662	4.8739	0	2	21.85	0.268701	0.0122975	2.82012	0.129067	0	0.171009	0.171009
	This study	Gulbel pass-A		GP-005	22.04	0.64	2	4	3	19.6933	3.74029	0.189926	13.4444			0.784574	1	2	21.85					0.0881348
	This study	Gulbel pass-A		GP-006	21.66	0.66	1.97	3.8809	3	19.6933	3.74029	0.189926	8.8792			0.620353	1	2	21.85					0.0828742
	This study	Gulbel pass-C		GP-003A	17.52	0.68	1.65	2.7225	3	17.3333	0.865236	0.0499175	0.0753556	3.70771	1.85386	0.202739	1	3	17.3333	0.865236	0.0499175	3.00327	0.173266	No Rejection	3.70771	1.85386
	This study	Gulbel pass-C		GP-003B	16.39	0.98	1.71	2.9241	3	17.3333	0.865236	0.0499175	0.92657			1.33535	1	3	17.3333					No Rejection
	This study	Gulbel pass-C		GP-003C	18.09	0.46	1.62	2.6244	3	17.3333	0.865236	0.0499175	2.70579			1.23104	1	3	17.3333					No Rejection
	This study	Gulbel pass-D		GP-002A	17.57	0.54	1.6	2.56	3	16.7933	0.865698	0.0515501	2.06863	3.84337	1.92169	1.23793	1	3	16.7933	0.865698	0.0515501	2.83772	0.168979	No Rejection	3.84337	1.92169
	This study	Gulbel pass-D		GP-002C	15.86	0.72	1.54	2.3716	3	16.7933	0.865698	0.0515501	1.68038			1.66079	1	3	16.7933					No Rejection
	This study	Gulbel pass-D		GP-002D	16.95	0.51	1.54	2.3716	3	16.7933	0.865698	0.0515501	0.0943654			0.179074	1	3	16.7933					No Rejection
At Bashi (W Tian Shan)	Zech (2012)	Zec2012-A	Zec2012-001	KI11	10.2	0.42	0.97	0.9409	4	14.83	3.19233	0.215262	121.524	151.111	50.3702	5.70327	0	3	16.3733	0.997614	0.0609292	2.84848	0.173971	0	5.36509	2.68254
	Zech (2012)	Zec2012-A	Zec2012-002	KI12	16.29	0.59	1.52	2.3104	4	14.83	3.19233	0.215262	6.12353			0.516346	1	3	16.3733					0.0199496
	Zech (2012)	Zec2012-A	Zec2012-003	KI13	17.41	0.54	1.59	2.5281	4	14.83	3.19233	0.215262	22.8272			1.03064	1	3	16.3733					3.68545
	Zech (2012)	Zec2012-A	Zec2012-004	KI14	15.42	0.74	1.51	2.2801	4	14.83	3.19233	0.215262	0.635683			0.199159	1	3	16.3733					1.65969
	Zech (2012)	Zec2012-B	Zec2012-005	KI21	21.08	0.74	1.96	3.8416	5	20.114	2.72208	0.135333	1.70408	63.0577	15.7644	0.381114	1	4	19.0975	1.7295	0.0905614	3.93754	0.206181	7.17733	21.6855	7.2285
	Zech (2012)	Zec2012-B	Zec2012-006	KI22	24.18	0.82	2.23	4.9729	5	20.114	2.72208	0.135333	24.5871			2.65537	0	4	19.0975					0
	Zech (2012)	Zec2012-B	Zec2012-007	KI23	17.75	0.57	1.63	2.6569	5	20.114	2.72208	0.135333	17.2007			1.05294	1	4	19.0975					5.58866
	Zech (2012)	Zec2012-B	Zec2012-008	KI24	17.55	0.58	1.61	2.5921	5	20.114	2.72208	0.135333	19.5425			1.17211	1	4	19.0975					7.11878
	Zech (2012)	Zec2012-B	Zec2012-009	KI25	20.01	0.68	1.85	3.4225	5	20.114	2.72208	0.135333	0.023391			0.0404329	1	4	19.0975					1.80073
	Zech (2012)	Zec2012-C	Zec2012-010	KI31	62.94	1.93	5.79	33.5241	3	49.3233	26.8439	0.544243	49.7768	1886.86	943.43	0.597951	1	2	64.785	2.60922	0.0402751	8.98787	0.138734	0.913857	1.39859	1.39859
	Zech (2012)	Zec2012-C	Zec2012-011	KI32	66.63	2.65	6.36	40.4496	3	49.3233	26.8439	0.544243	42.6516			0.821368	1	2	64.785					0.484731
	Zech (2012)	Zec2012-C	Zec2012-012	KI33	18.4	0.73	1.74	3.0276	3	49.3233	26.8439	0.544243	1794.43			17.1199	0	2	64.785					0
Dumda (Qilian Shan)	This study	Dumda-A		CH-DU-01	125.39	2.82	11.4	129.96	3	140.547	16.7997	0.119531	28.8874	48.455	24.2275	1.50625	1	2	131.515	8.66206	0.0658637	19.205	0.146029	4.71752	7.07402	7.07402
	This study	Dumda-A		CH-DU-02	158.61	4.14	14.69	215.796	3	140.547	16.7997	0.119531	19.0369			2.82223	0	2	131.515					0
	This study	Dumda-A		CH-DU-03	137.64	3.99	12.8	163.84	3	140.547	16.7997	0.119531	0.530695			0.182989	1	2	131.515					2.35649
Gangshiqia (Qilian Shan)	Owen et al. (2003b)	Owen2003d-C	Owen2003d-005	Q9	11.87	0.45	1.11	1.2321	3	13.1233	1.24022	0.0945046	7.75726	15.1914	7.59572	1.95738	1	3	13.1233	1.24022	0.0945046	2.43935	0.185879	No Rejection	15.1914	7.59572
	Owen et al. (2003b)	Owen2003d-C	Owen2003d-006	Q10	14.35	0.45	1.31	1.7161	3	13.1233	1.24022	0.0945046	7.43067			1.82036	1	3	13.1233					No Rejection
	Owen et al. (2003b)	Owen2003d-C	Owen2003d-007	Q11	13.15	0.45	1.21	1.4641	3	13.1233	1.24022	0.0945046	0.00351166			0.0220941	1	3	13.1233					No Rejection
	Owen et al. (2003b)	Owen2003d-D	Owen2003d-008	Q12	11.49	0.68	1.19	1.4161	3	17.1033	6.12132	0.357902	68.1434	158.645	79.3224	1.58729	1	2	13.84	3.3234	0.24013	3.90086	0.281854	11.9431	18.761	18.761
	Owen et al. (2003b)	Owen2003d-D	Owen2003d-009	Q13	23.63	0.69	2.14	4.5796	3	17.1033	6.12132	0.357902	89.4715			2.88427	0	2	13.84					0
	Owen et al. (2003b)	Owen2003d-D	Owen2003d-010	Q14	16.19	0.9	1.66	2.7556	3	17.1033	6.12132	0.357902	1.02985			0.158724	1	2	13.84					6.8179
	This study	Qilian Shan-D		QS-GG-001	11.31	0.42	1.06	1.1236	7	10.4857	4.95299	0.472356	3.85174	2698.87	449.812	0.177188	1	6	11.715	1.52527	0.130198	4.93872	0.421572	0.929847	1189.06	237.813
	This study	Qilian Shan-D		QS-GG-002	13.52	0.42	1.23	1.5129	7	10.4857	4.95299	0.472356	52.1933			0.675461	1	6	11.715					18.4695
	This study	Qilian Shan-D		QS-GG-003	14.54	0.48	1.33	1.7689	7	10.4857	4.95299	0.472356	71.3422			0.930613	1	6	11.715					34.6381
	This study	Qilian Shan-D		QS-GG-004	14.89	0.42	1.34	1.7956	7	10.4857	4.95299	0.472356	109.964			1.02585	1	6	11.715					57.1464
	This study	Qilian Shan-D		QS-GG-005	3.84	0.24	0.41	0.1681	7	10.4857	4.95299	0.472356	766.762			1.76987	1	6	11.715					1076.66
	This study	Qilian Shan-D		QS-GG-006	3.11	0.18	0.32	0.1024	7	10.4857	4.95299	0.472356	1679.05			2.10082	0	6	11.715					0
	This study	Qilian Shan-D		QS-GG-007	12.19	0.43	1.13	1.2769	7	10.4857	4.95299	0.472356	15.709			0.369571	1	6	11.715					1.22025
Laolongwan (Qilian Shan)	Owen et al. (2003b)	Owen2003d-A	Owen2003d-001	Q1	17.66	0.49	1.59	2.5281	3	13.2233	3.85072	0.291206	81.9826	255.109	127.554	10.9385	0	2	11.005	0.360624	0.0327691	1.41868	0.128912	0	2.25781	2.25781
	Owen et al. (2003b)	Owen2003d-A	Owen2003d-002	Q2	10.75	0.24	0.95	0.9025	3	13.2233	3.85072	0.291206	106.204			0.818652	1	2	11.005					1.12891
	Owen et al. (2003b)	Owen2003d-A	Owen2003d-003	Q3	11.26	0.24	0.99	0.9801	3	13.2233	3.85072	0.291206	66.9215			0.602003	1	2	11.005					1.12891
	Owen et al. (2003b)	Owen2003d-E	Owen2003d-011	Q15	20.06	0.45	1.78	3.1684	3	19.45	0.528299	0.0271619	1.83753	2.40037	1.20019	2.03308	0	2	19.145	0.00707107	0.000369343	2.54137	0.132743	0	0.000148337	0.000148337
	Owen et al. (2003b)	Owen2003d-E	Owen2003d-012	Q16	19.15	0.91	1.88	3.5344	3	19.45	0.528299	0.0271619	0.108683			0.402283	1	2	19.145					3.01896e-05
	Owen et al. (2003b)	Owen2003d-E	Owen2003d-013	Q17	19.14	0.46	1.71	2.9241	3	19.45	0.528299	0.0271619	0.454159			0.587878	1	2	19.145					0.000118147
Haiyuan (Qilian Shan)	Lasserre et al. (2002)	Lass2002-A	Lass2002-001	LLL1	5.92	0.41	0.65	0.4225	12	9.4725	4.21523	0.444997	75.0759	2191.07	199.189	0.905036	1	12	9.4725	4.21523	0.444997	5.55259	0.586179	No Rejection	2191.07	199.189
	Lasserre et al. (2002)	Lass2002-A	Lass2002-002	LLL2	8.2	0.41	0.81	0.6561	12	9.4725	4.21523	0.444997	9.6327			0.314068	1	12	9.4725					No Rejection
	Lasserre et al. (2002)	Lass2002-A	Lass2002-003	LLL3	12.78	0.65	1.27	1.6129	12	9.4725	4.21523	0.444997	25.8924			0.832739	1	12	9.4725					No Rejection
	Lasserre et al. (2002)	Lass2002-A	Lass2002-004	LLL4	7.85	0.39	0.78	0.6084	12	9.4725	4.21523	0.444997	17.3077			0.401755	1	12	9.4725					No Rejection
	Lasserre et al. (2002)	Lass2002-A	Lass2002-005	LLL5	14.31	0.79	1.46	2.1316	12	9.4725	4.21523	0.444997	37.4962			1.25734	1	12	9.4725					No Rejection
	Lasserre et al. (2002)	Lass2002-A	Lass2002-006	LLL6	3.14	0.17	0.32	0.1024	12	9.4725	4.21523	0.444997	1387.56			1.77195	1	12	9.4725					No Rejection
	Lasserre et al. (2002)	Lass2002-A	Lass2002-007	LLL7	4.7	0.35	0.53	0.2809	12	9.4725	4.21523	0.444997	185.933			1.25599	1	12	9.4725					No Rejection
	Lasserre et al. (2002)	Lass2002-A	Lass2002-008	LLL8	11.37	0.66	1.18	1.3924	12	9.4725	4.21523	0.444997	8.26562			0.46771	1	12	9.4725					No Rejection
	Lasserre et al. (2002)	Lass2002-A	Lass2002-009	LLL9	12.98	0.73	1.33	1.7689	12	9.4725	4.21523	0.444997	23.0861			0.883995	1	12	9.4725					No Rejection
	Lasserre et al. (2002)	Lass2002-A	Lass2002-010	LLL10	14.33	0.72	1.42	2.0164	12	9.4725	4.21523	0.444997	45.5156			1.26711	1	12	9.4725					No Rejection
	Lasserre et al. (2002)	Lass2002-A	Lass2002-010	LLL10b	13.6	0.7	1.36	1.8496	12	9.4725	4.21523	0.444997	34.7679			1.05614	1	12	9.4725					No Rejection
	Lasserre et al. (2002)	Lass2002-A	Lass2002-011	LLL11	4.49	0.27	0.47	0.2209	12	9.4725	4.21523	0.444997	340.539			1.32181	1	12	9.4725					No Rejection
La Ji (Qilian Shan)	Owen et al. (2003a)	Owen2003c-C	Owen2003c-007	LJ7	23.57	0.7	2.14	4.5796	4	38.0975	25.606	0.672117	430.711	2894.78	964.927	0.667024	1	3	25.3533	3.00264	0.118432	4.94408	0.195007	6.49036	56.9926	28.4963
	Owen et al. (2003a)	Owen2003c-C	Owen2003c-008	LJ8	28.82	0.68	2.57	6.6049	4	38.0975	25.606	0.672117	186.142			0.406376	1	3	25.3533					25.99
	Owen et al. (2003a)	Owen2003c-C	Owen2003c-009	LJ9	76.33	1.75	6.87	47.1969	4	38.0975	25.606	0.672117	477.298			14.6679	0	3	25.3533					0
	Owen et al. (2003a)	Owen2003c-C	Owen2003c-010	LJ10	23.67	0.34	2.06	4.2436	4	38.0975	25.606	0.672117	1800.63			0.661822	1	3	25.3533					24.5122
Mawang Kangri (Inner Tibet)	Amidon et al. (2013)	Amid2013-A	Amid2013-001	1	26.15	0.36	2.28	5.1984	7	61.9343	20.7377	0.334834	9880.52	10606.6	1767.77	2.83142	0	5	62.684	8.2265	0.131238	14.9329	0.238226	0	299.351	74.8377
	Amidon et al. (2013)	Amid2013-A	Amid2013-002	3	70.6	1.35	6.28	39.4384	7	61.9343	20.7377	0.334834	41.2042			0.451969	1	5	62.684					34.383
	Amidon et al. (2013)	Amid2013-A	Amid2013-003	4	59.86	0.87	5.26	27.6676	7	61.9343	20.7377	0.334834	5.68458			0.106554	1	5	62.684					10.5364
	Amidon et al. (2013)	Amid2013-A	Amid2013-004	5	59.99	1.09	5.31	28.1961	7	61.9343	20.7377	0.334834	3.18176			0.0998221	1	5	62.684					6.10861
	Amidon et al. (2013)	Amid2013-A	Amid2013-005	8	71.23	1.02	6.27	39.3129	7	61.9343	20.7377	0.334834	83.0549			0.486494	1	5	62.684					70.1981
	Amidon et al. (2013)	Amid2013-A	Amid2013-006	9	51.74	0.82	4.55	20.7025	7	61.9343	20.7377	0.334834	154.556			0.535928	1	5	62.684					178.125
	Amidon et al. (2013)	Amid2013-A	Amid2013-007	11	93.97	1.53	8.36	69.8896	7	61.9343	20.7377	0.334834	438.416			2.23784	0	5	62.684					0
Karakax-A (W Kunlun)	This study	Karakax-A		KG2-1	81.37	3.14	7.75	60.0625	3	87.26	5.39111	0.0617822	3.51861	6.94222	3.47111	2.21223	0	2	90.205	2.4678	0.0273577	12.0237	0.133293	0	0.858581	0.858581
	This study	Karakax-A		KG2-2	88.46	2.72	8.19	67.0761	3	87.26	5.39111	0.0617822	0.194637			0.226122	1	2	90.205					0.411579
	This study	Karakax-A		KG2-3	91.95	2.61	8.45	71.4025	3	87.26	5.39111	0.0617822	3.22897			1.24467	1	2	90.205					0.447002
Karakax-B (W Kunlun)	This study	Karakax-B5		LIA-K-1	0.06	0.25	0.25	0.0625	4	4.1675	4.81674	1.15579	269.945	10110.2	3370.05	1.12697	1	3	2.29333	3.70492	1.61552	3.76345	1.64104	79.8044	2981.95	1490.97
	This study	Karakax-B5		LIA-K-2	6.57	0.25	0.61	0.3721	4	4.1675	4.81674	1.15579	92.3521			0.575188	1	3	2.29333					292.638
	This study	Karakax-B5		LIA-K-3	9.79	0.45	0.95	0.9025	4	4.1675	4.81674	1.15579	156.111			2.00867	0	3	2.29333					0
	This study	Karakax-B5		LIA-K-4	0.25	0.04	0.05	0.0025	4	4.1675	4.81674	1.15579	9591.75			1.05373	1	3	2.29333					2609.51
Sentsa (Sayan)	Arzhannikov et al. (2012)	Arzh2012-A	Arzh2012-001	SO7BE6	17.86	3.01	3.38	11.4244	4	18.26	1.39611	0.0764575	0.0176598	9.55484	3.18495	0.154754	1	3	17.5833	0.42004	0.0238885	4.26214	0.242397	0.00844852	0.325219	0.162609
	Arzhannikov et al. (2012)	Arzh2012-A	Arzh2012-002	SO7BE7	20.29	0.73	1.89	3.5721	4	18.26	1.39611	0.0764575	7.73297			3.21373	0	3	17.5833					0
	Arzhannikov et al. (2012)	Arzh2012-A	Arzh2012-003	SO7BE8	17.79	1.11	1.89	3.5721	4	18.26	1.39611	0.0764575	0.179287			0.313	1	3	17.5833					0.0346653
	Arzhannikov et al. (2012)	Arzh2012-A	Arzh2012-004	SO7BE9	17.1	0.91	1.73	2.9929	4	18.26	1.39611	0.0764575	1.62492			0.915406	1	3	17.5833					0.282105
Jombolok (Sayan)	Arzhannikov et al. (2012)	Arzh2012-B	Arzh2012-005	SO7BE10	26	1.23	2.55	6.5025	3	24.8733	1.05078	0.0422451	0.839036	1.50796	0.753982	1.25371	1	3	24.8733	1.05078	0.0422451	4.87043	0.195809	No Rejection	1.50796	0.753982
	Arzhannikov et al. (2012)	Arzh2012-B	Arzh2012-006	SO7BE11	23.92	1.17	2.37	5.6169	3	24.8733	1.05078	0.0422451	0.663923			0.961074	1	3	24.8733					No Rejection
	Arzhannikov et al. (2012)	Arzh2012-B	Arzh2012-007	SO7BE12	24.7	2.45	3.24	10.4976	3	24.8733	1.05078	0.0422451	0.00500532			0.0909864	1	3	24.8733					No Rejection
	Arzhannikov et al. (2012)	Arzh2012-C	Arzh2012-008	SO7BE13	26.64	1.18	2.57	6.6049	3	32.0033	10.2124	0.319104	20.6588	50.5555	25.2777	0.622857	1	2	26.115	0.742462	0.0284305	4.02694	0.1542	0.19795	0.2629	0.2629
	Arzhannikov et al. (2012)	Arzh2012-C	Arzh2012-009	SO7BE14	25.59	2.06	3.01	9.0601	3	32.0033	10.2124	0.319104	9.69244			0.782519	1	2	26.115					0.0649507
	Arzhannikov et al. (2012)	Arzh2012-C	Arzh2012-010	SO7BE15	43.78	2.62	4.6	21.16	3	32.0033	10.2124	0.319104	20.2042			6.48693	0	2	26.115					0
Sailag (Sayan)	Batbaatar and Gillespie (2016)	Arzh2012-D	BatGil2016-011	070802-ag-RSLK-1	20.57	0.87	1.97	3.8809	12	25.9117	19.1189	0.73785	37.6977	1545.83	140.53	0.291462	1	10	17.834	3.14277	0.176224	6.4999	0.364467	9.88994	120.63	13.4034
	Batbaatar and Gillespie (2016)	Arzh2012-D	BatGil2016-012	070802-ag-RSLK-2	22.4	0.97	2.16	4.6656	12	25.9117	19.1189	0.73785	13.1064			0.191144	1	10	17.834					22.1579
	Batbaatar and Gillespie (2016)	Arzh2012-D	BatGil2016-013	070802-ag-RSLK-3	20.33	0.84	1.93	3.7249	12	25.9117	19.1189	0.73785	44.1539			0.304686	1	10	17.834					8.82939
	Batbaatar and Gillespie (2016)	Arzh2012-D	BatGil2016-014	070802-ag-RSLK-4	63.38	2.24	5.93	35.1649	12	25.9117	19.1189	0.73785	279.79			2.56493	0	10	17.834					0
	Batbaatar and Gillespie (2016)	Arzh2012-D	BatGil2016-015	070802-ag-RSLK-5	19.69	0.85	1.89	3.5721	12	25.9117	19.1189	0.73785	53.5767			0.339965	1	10	17.834					4.7678
	Batbaatar and Gillespie (2016)	Arzh2012-D	BatGil2016-016	070802-ag-RSLK-6	13.91	0.62	1.34	1.7956	12	25.9117	19.1189	0.73785	374.714			0.665749	1	10	17.834					40.0566
	Batbaatar and Gillespie (2016)	Arzh2012-D	BatGil2016-017	070802-ag-RSLK-7	16.21	0.6	1.52	2.3104	12	25.9117	19.1189	0.73785	261.451			0.534432	1	10	17.834					7.32604
	Batbaatar and Gillespie (2016)	Arzh2012-D	BatGil2016-018	070802-ag-RSLK-8	12.24	1.1	1.52	2.3104	12	25.9117	19.1189	0.73785	154.475			0.762191	1	10	17.834					25.8618
	Batbaatar and Gillespie (2016)	Arzh2012-D	BatGil2016-019	070802-ag-RSLK-10	18.45	0.82	1.78	3.1684	12	25.9117	19.1189	0.73785	82.8026			0.408697	1	10	17.834					0.564331
	Arzhannikov et al. (2012)	Arzh2012-D	Arzh2012-011	SO7BE16	69.22	4	7.22	52.1284	12	25.9117	19.1189	0.73785	117.226			3.2336	0	10	17.834					0
	Arzhannikov et al. (2012)	Arzh2012-D	Arzh2012-012	SO7BE17	16.75	1	1.75	3.0625	12	25.9117	19.1189	0.73785	83.9361			0.503563	1	10	17.834					1.17506
	Arzhannikov et al. (2012)	Arzh2012-D	Arzh2012-013	SO7BE18	17.79	1.24	1.97	3.8809	12	25.9117	19.1189	0.73785	42.899			0.444991	1	10	17.834					0.00125911
Gichginii (Gobi-Altai)	Batbaatar et al. (2018)	Batb2018-A	Batb2018-001	GN-AG-10B	6.74	0.22	0.62	0.3844	4	6.805	1.19592	0.175742	0.0872934	75.4909	25.1636	0.0585514	1	3	7.34667	0.62043	0.0844505	1.31736	0.179314	7.60422	21.4926	10.7463
	Batbaatar et al. (2018)	Batb2018-A	Batb2018-002	GN-AG-11	7.98	0.17	0.7	0.49	4	6.805	1.19592	0.175742	47.7725			1.39913	1	3	7.34667					13.8793
	Batbaatar et al. (2018)	Batb2018-A	Batb2018-003	GN-JB-004	5.18	0.33	0.55	0.3025	4	6.805	1.19592	0.175742	24.2482			3.0832	0	3	7.34667					0
	Batbaatar et al. (2018)	Batb2018-A	Batb2018-004	GN-JB-005	7.32	0.28	0.69	0.4761	4	6.805	1.19592	0.175742	3.38297			0.479948	1	3	7.34667					0.00907029
	Batbaatar et al. (2018)	Batb2018-B	Batb2018-005	GN-AG-07	1.53	0.09	0.16	0.0256	5	2.142	0.966395	0.451165	46.24	2396.5	599.124	0.730307	1	4	2.4825	0.687235	0.276832	0.82897	0.333926	112.007	212.327	70.7758
	Batbaatar et al. (2018)	Batb2018-B	Batb2018-006	GN-AG-08	3.14	0.07	0.28	0.0784	5	2.142	0.966395	0.451165	203.266			1.3651	1	4	2.4825					88.2258
	Batbaatar et al. (2018)	Batb2018-B	Batb2018-007	GN-AG-04	0.78	0.03	0.07	0.0049	5	2.142	0.966395	0.451165	2061.16			2.47496	0	4	2.4825					0
	Batbaatar et al. (2018)	Batb2018-B	Batb2018-008	GN-AG-05	2.76	0.08	0.25	0.0625	5	2.142	0.966395	0.451165	59.6756			0.739077	1	4	2.4825					12.0322
	Batbaatar et al. (2018)	Batb2018-B	Batb2018-009	GN-AG-06	2.5	0.07	0.22	0.0484	5	2.142	0.966395	0.451165	26.1559			0.409068	1	4	2.4825					0.0625
	Batbaatar et al. (2018)	Batb2018-C	Batb2018-010	GN-JB-001	0.88	0.1	0.12	0.0144	6	1.41667	0.392768	0.277248	28.8011	153.836	30.7672	1.88735	1	6	1.41667	0.392768	0.277248	0.586316	0.41387	No Rejection	153.836	30.7672
	Batbaatar et al. (2018)	Batb2018-C	Batb2018-011	GN-JB-002	1.02	0.1	0.13	0.0169	6	1.41667	0.392768	0.277248	15.7344			1.20659	1	6	1.41667					No Rejection
	Batbaatar et al. (2018)	Batb2018-C	Batb2018-012	GN-JB-003	1.44	0.26	0.29	0.0841	6	1.41667	0.392768	0.277248	0.00805391			0.054884	1	6	1.41667					No Rejection
	Batbaatar et al. (2018)	Batb2018-C	Batb2018-013	GN-AG-01	1.79	0.05	0.16	0.0256	6	1.41667	0.392768	0.277248	55.7511			1.14339	1	6	1.41667					No Rejection
	Batbaatar et al. (2018)	Batb2018-C	Batb2018-014	GN-AG-02	1.83	0.06	0.17	0.0289	6	1.41667	0.392768	0.277248	47.4568			1.30175	1	6	1.41667					No Rejection
	Batbaatar et al. (2018)	Batb2018-C	Batb2018-015	GN-AG-03	1.54	0.05	0.14	0.0196	6	1.41667	0.392768	0.277248	6.08444			0.338849	1	6	1.41667					No Rejection
Sutai (Gobi-Altai)	Batbaatar et al. (2018)	Batb2018-E	Batb2018-017	DHC-98-13	25.69	0.81	2.35	5.5225	4	19.8	8.89258	0.44912	52.8762	3373.85	1124.62	0.800923	1	3	24.1967	1.62263	0.0670601	4.24527	0.175449	3.39894	9.88919	4.9446
	Batbaatar et al. (2018)	Batb2018-E	Batb2018-018	DHC-98-10	22.47	0.68	2.05	4.2025	4	19.8	8.89258	0.44912	15.4172			0.332948	1	3	24.1967					6.44762
	Batbaatar et al. (2018)	Batb2018-E	Batb2018-019	DHC-98-11	24.43	1.13	2.38	5.6644	4	19.8	8.89258	0.44912	16.7882			0.600734	1	3	24.1967					0.042638
	Batbaatar et al. (2018)	Batb2018-E	Batb2018-020	DHC-98-15	6.61	0.23	0.61	0.3721	4	19.8	8.89258	0.44912	3288.77			10.7311	0	3	24.1967					0
	Batbaatar et al. (2018)	Batb2018-F	Batb2018-021	MOT98-CS-11a	44.03	1.13	3.97	15.7609	3	27.08	15.7307	0.580898	225	802.004	401.002	3.1479	0	2	18.605	7.99738	0.429851	8.49718	0.456715	0	105.709	105.709
	Batbaatar et al. (2018)	Batb2018-F	Batb2018-022	MOT98-CS-11b	12.95	0.59	1.26	1.5876	3	27.08	15.7307	0.580898	573.562			1.5148	1	2	18.605					91.8674
	Batbaatar et al. (2018)	Batb2018-F	Batb2018-023	MOT98-CS-12	24.26	1.52	2.58	6.6564	3	27.08	15.7307	0.580898	3.442			0.192016	1	2	18.605					13.8413
	Batbaatar et al. (2018)	Batb2018-J	Batb2018-029	MOT98-CS-25	5.83	0.22	0.55	0.3025	5	13.848	4.97693	0.359397	1328.27	1434.42	358.605	3.99684	0	4	15.8525	2.49794	0.157574	3.82303	0.241163	0	78.9988	26.3329
	Batbaatar et al. (2018)	Batb2018-J	Batb2018-030	SUT-JB-02A	15.1	0.39	1.35	1.8225	5	13.848	4.97693	0.359397	10.3057			0.274412	1	4	15.8525					3.72292
	Batbaatar et al. (2018)	Batb2018-J	Batb2018-031	SUT-JB-02B	19.44	0.6	1.77	3.1329	5	13.848	4.97693	0.359397	86.8624			1.54924	1	4	15.8525					35.7504
	Batbaatar et al. (2018)	Batb2018-J	Batb2018-032	SUT-JB-02C	13.64	0.36	1.22	1.4884	5	13.848	4.97693	0.359397	0.333827			0.0451658	1	4	15.8525					37.7713
	Batbaatar et al. (2018)	Batb2018-J	Batb2018-033	SUT-JB-02D	15.23	0.47	1.39	1.9321	5	13.848	4.97693	0.359397	8.6461			0.303249	1	4	15.8525					1.75422
Ih Bogd (Gobi-Altai)	Batbaatar et al. (2018)	Batb2018-K	Batb2018-034	IB-JB-003E	16.38	1.21	0.78	0.6084	6	12.8667	3.07881	0.239286	8.43078	155.453	31.0907	1.36001	1	5	14.018	1.38097	0.0985138	3.43959	0.245369	3.81056	6.03111	1.50778
	Batbaatar et al. (2018)	Batb2018-K	Batb2018-035	IB-JB-003A	7.11	0.48	2.05	4.2025	6	12.8667	3.07881	0.239286	143.833			4.72501	0	5	14.018					0
	Batbaatar et al. (2018)	Batb2018-K	Batb2018-036	IB-JB-003B	12.95	1.72	1.4	1.96	6	12.8667	3.07881	0.239286	0.00234736			0.0259892	1	5	14.018					0.385554
	Batbaatar et al. (2018)	Batb2018-K	Batb2018-037	IB-JB-003C	13.97	0.73	1.48	2.1904	6	12.8667	3.07881	0.239286	2.28438			0.381943	1	5	14.018					0.00432351
	Batbaatar et al. (2018)	Batb2018-K	Batb2018-038	IB-JB-003D	13.65	0.91	1.85	3.4225	6	12.8667	3.07881	0.239286	0.740987			0.265948	1	5	14.018					0.163536
	Batbaatar et al. (2018)	Batb2018-K	Batb2018-039	IB-JB-002	13.14	0.68	1.32	1.7424	6	12.8667	3.07881	0.239286	0.161572			0.0935661	1	5	14.018					1.66714
Otgontenger, Bitüüt (Hangai)	Batbaatar et al. (2018)	Batb2018-M	Batb2018-044	DHC-98-5	30.7	0.93	2.8	7.84	3	47.11	29.6173	0.628685	311.352	893.077	446.539	0.669612	1	2	30.015	0.968736	0.0322751	3.9951	0.133104	0.542519	1.1349	1.1349
	Batbaatar et al. (2018)	Batb2018-M	Batb2018-045	DHC-98-7	81.3	2.53	7.52	56.5504	3	47.11	29.6173	0.628685	182.624			18.9305	0	2	30.015					0
	Batbaatar et al. (2018)	Batb2018-M	Batb2018-046	DHC-98-8	29.33	0.89	2.68	7.1824	3	47.11	29.6173	0.628685	399.102			0.745166	1	2	30.015					0.592381
	Batbaatar et al. (2018)	Batb2018-O	Batb2018-048	DHC-98-3	14.7	0.53	1.37	1.8769	3	15.7333	0.895396	0.0569107	3.80127	5.98309	2.99155	2.9152	0	2	16.25	0.0424264	0.00261086	2.09347	0.128829	0	0.00734844	0.00734844
	Batbaatar et al. (2018)	Batb2018-O	Batb2018-049	MOT98-CS-04	16.22	0.49	1.48	2.1904	3	15.7333	0.895396	0.0569107	0.986441			0.598381	1	2	16.25					0.00374844
	Batbaatar et al. (2018)	Batb2018-O	Batb2018-050	MOT98-CS-05	16.28	0.5	1.48	2.1904	3	15.7333	0.895396	0.0569107	1.19538			0.691743	1	2	16.25					0.0036
Bumbat (Hangai)	Batbaatar et al. (2018)	Batb2018-P	Batb2018-051	HN-JB-01B	101.88	2.79	9.35	87.4225	3	58.89	40.2497	0.683473	237.425	1508.15	754.075	2.95673	0	2	37.395	21.6304	0.57843	22.2552	0.595138	0	333.957	333.957
	Batbaatar et al. (2018)	Batb2018-P	Batb2018-052	HN-JB-01C	52.69	1.41	4.77	22.7529	3	58.89	40.2497	0.683473	19.335			0.164804	1	2	37.395					117.669
	Batbaatar et al. (2018)	Batb2018-P	Batb2018-053	HN-JB-01A	22.1	1.04	2.16	4.6656	3	58.89	40.2497	0.683473	1251.39			1.58586	1	2	37.395					216.288
	Batbaatar et al. (2018)	Batb2018-Q	Batb2018-054	HN-JB-02A	21.77	0.92	2.08	4.3264	6	34.6533	9.09901	0.262573	196.101	282.495	56.4991	2.09335	0	4	34.2925	3.75082	0.109377	7.62303	0.222294	0	19.9608	6.65359
	Batbaatar et al. (2018)	Batb2018-Q	Batb2018-055	HN-JB-02B	38.84	1.63	3.73	13.9129	6	34.6533	9.09901	0.262573	6.59723			0.500183	1	4	34.2925					7.78342
	Batbaatar et al. (2018)	Batb2018-Q	Batb2018-056	HN-JB-02C	31.21	1.11	2.91	8.4681	6	34.6533	9.09901	0.262573	9.62304			0.410813	1	4	34.2925					7.71188
	Batbaatar et al. (2018)	Batb2018-Q	Batb2018-057	HN-JB-03A	35.9	1.35	3.37	11.3569	6	34.6533	9.09901	0.262573	0.852772			0.146102	1	4	34.2925					1.41786
	Batbaatar et al. (2018)	Batb2018-Q	Batb2018-058	HN-JB-03B	31.22	1.76	3.21	10.3041	6	34.6533	9.09901	0.262573	3.80546			0.405855	1	4	34.2925					3.0476
	Batbaatar et al. (2018)	Batb2018-Q	Batb2018-059	HN-JB-03C	48.98	1.77	4.59	21.0681	6	34.6533	9.09901	0.262573	65.5155			2.5615	0	4	34.2925					0
Mönh-Saridag (Sayan)	Batbaatar and Gillespie (2016)	BatGil2016-B	BatGil2016-003	070402-ag-RMS-3	10.52	0.4	0.98	0.9604	3	10.1033	0.492375	0.0487339	1.08507	2.41941	1.2097	1.008	1	3	10.1033	0.492375	0.0487339	1.77939	0.176119	No Rejection	2.41941	1.2097
	Batbaatar and Gillespie (2016)	BatGil2016-B	BatGil2016-004	070402-ag-RMS-4	10.23	0.55	1.03	1.0609	3	10.1033	0.492375	0.0487339	0.0530395			0.217473	1	3	10.1033					No Rejection
	Batbaatar and Gillespie (2016)	BatGil2016-B	BatGil2016-005	070402-ag-RMS-5	9.56	0.48	0.95	0.9025	3	10.1033	0.492375	0.0487339	1.2813			1.5614	1	3	10.1033					No Rejection
	Batbaatar and Gillespie (2016)	BatGil2016-D	BatGil2016-008	070402-ag-RMS-8A	25.85	0.77	2.35	5.5225	3	24.4867	4.2522	0.173654	3.13489	88.9981	44.4991	0.350883	1	2	26.87	1.4425	0.0536843	3.72873	0.138769	1.75476	3.60436	3.60436
	Batbaatar and Gillespie (2016)	BatGil2016-D	BatGil2016-009	070402-ag-RMS-8B	19.72	0.59	1.79	3.2041	3	24.4867	4.2522	0.173654	65.2718			4.58777	0	2	26.87					0
	Batbaatar and Gillespie (2016)	BatGil2016-D	BatGil2016-010	070402-ag-RMS-9	27.89	0.75	2.51	6.3001	3	24.4867	4.2522	0.173654	20.5914			1.1605	1	2	26.87					1.8496
Jombolok (Sayan)	Batbaatar and Gillespie (2016)	BatGil2016-E	BatGil2016-020	071002-ag-RDJO-1	19.51	0.89	1.89	3.5721	4	24.14	6.68236	0.276817	27.0634	63.6366	21.2122	0.844144	1	3	20.8633	1.60054	0.0767155	4.05026	0.194133	2.31222	3.71816	1.85908
	Batbaatar and Gillespie (2016)	BatGil2016-E	BatGil2016-021	071002-ag-RDJO-2	20.45	0.92	1.98	3.9204	4	24.14	6.68236	0.276817	16.0871			0.641891	1	3	20.8633					0.201848
	Batbaatar and Gillespie (2016)	BatGil2016-E	BatGil2016-022	071002-ag-RDJO-3	33.97	2.22	3.67	13.4689	4	24.14	6.68236	0.276817	19.6065			4.78903	0	3	20.8633					0
	Batbaatar and Gillespie (2016)	BatGil2016-E	BatGil2016-023	071002-ag-RDJO-5	22.63	1.61	2.52	6.3504	4	24.14	6.68236	0.276817	0.879634			0.244057	1	3	20.8633					1.20409
Gyalgar (Hangai)	Batbaatar and Gillespie (2016)	BatGil2016-L	BatGil2016-035	ZAG-ARG-02B	16.93	0.67	1.6	2.56	3	64.82	78.4367	1.21007	5109.05	6360.03	3180.02	0.762955	1	2	19.56	3.71938	0.190152	4.66153	0.23832	15.4086	19.5014	19.5014
	Batbaatar and Gillespie (2016)	BatGil2016-L	BatGil2016-036	ZAG-ARG-03A	22.19	1.3	2.31	5.3361	3	64.82	78.4367	1.21007	1075.34			0.653305	1	2	19.56					4.09284
	Batbaatar and Gillespie (2016)	BatGil2016-L	BatGil2016-037	ZAG-ARG-03B	155.34	6.83	15.39	236.852	3	64.82	78.4367	1.21007	175.65			17.459	0	2	19.56					0
	Batbaatar and Gillespie (2016)	BatGil2016-N	BatGil2016-039	ZAG-SB-04A	25.12	0.72	2.27	5.1529	3	31.49	15.2293	0.483622	78.2733	680.748	340.374	0.475665	1	2	22.8	3.28098	0.143902	4.39775	0.192884	10.3827	25.8449	25.8449
	Batbaatar and Gillespie (2016)	BatGil2016-N	BatGil2016-040	ZAG-SB-04B	48.87	1.09	4.36	19.0096	3	31.49	15.2293	0.483622	254.242			7.54057	0	2	22.8					0
	Batbaatar and Gillespie (2016)	BatGil2016-N	BatGil2016-041	ZAG-SB-04C	20.48	0.59	1.85	3.4225	3	31.49	15.2293	0.483622	348.234			0.982793	1	2	22.8					15.4622
Koyandy (W Tian Shan)	Blomdin et al. (2016)	Blom-E	Blom-016	TS-C-12-028	5.33	0.23	0.51	0.2601	5	2.104	2.12153	1.00833	196.731	2001.77	500.443	3.07673	0	4	1.2975	1.29031	0.994456	1.3403	1.03298	0	407.086	135.695
	Blomdin et al. (2016)	Blom-E	Blom-017	TS-C-12-029	3.21	0.19	0.33	0.1089	5	2.104	2.12153	1.00833	33.8847			0.588027	1	4	1.2975					101.32
	Blomdin et al. (2016)	Blom-E	Blom-018	TS-C-12-031	0.93	0.04	0.09	0.0081	5	2.104	2.12153	1.00833	861.422			0.629852	1	4	1.2975					84.4102
	Blomdin et al. (2016)	Blom-E	Blom-019	TS-C-12-030	0.59	0.08	0.09	0.0081	5	2.104	2.12153	1.00833	358.156			0.841944	1	4	1.2975					78.2119
	Blomdin et al. (2016)	Blom-E	Blom-020	TS-C-12-027	0.46	0.07	0.08	0.0064	5	2.104	2.12153	1.00833	551.579			0.930261	1	4	1.2975					143.144
	Blomdin et al. (2016)	Blom-F	Blom-021	TS-C-12-050	17.22	0.36	1.52	2.3104	5	14.49	3.40878	0.23525	57.5069	606.295	151.574	0.964536	1	4	15.65	2.55389	0.163188	3.79192	0.242295	19.0193	249.273	83.0911
	Blomdin et al. (2016)	Blom-F	Blom-022	TS-C-12-049	17.13	0.41	1.53	2.3409	5	14.49	3.40878	0.23525	41.461			0.923928	1	4	15.65					13.0303
	Blomdin et al. (2016)	Blom-F	Blom-023	TS-C-12-047	16.39	0.34	1.45	2.1025	5	14.49	3.40878	0.23525	31.2284			0.632391	1	4	15.65					4.73702
	Blomdin et al. (2016)	Blom-F	Blom-024	TS-C-12-046	11.86	0.26	1.05	1.1025	5	14.49	3.40878	0.23525	102.321			0.923274	1	4	15.65					212.487
	Blomdin et al. (2016)	Blom-F	Blom-025	TS-C-12-048	9.85	0.24	0.88	0.7744	5	14.49	3.40878	0.23525	373.778			2.26109	0	4	15.65					0
Tomort (E Tian Shan)	Chen et al. (2015)	Chen2015-B	Chen2015-012	YW-09-6-1	14.45	0.51	1.34	1.7956	3	15.52	1.72502	0.111148	4.40177	28.5354	14.2677	0.757097	1	2	14.525	0.106066	0.00730231	1.88395	0.129704	0.0216263	0.0520481	0.0520481
	Chen et al. (2015)	Chen2015-B	Chen2015-013	YW-09-6-4	14.6	0.43	1.32	1.7424	3	15.52	1.72502	0.111148	4.57761			0.62555	1	2	14.525					0.0304218
	Chen et al. (2015)	Chen2015-B	Chen2015-014	YW-09-6-5	17.51	0.45	1.57	2.4649	3	15.52	1.72502	0.111148	19.556			6.45641	0	2	14.525					0
Samdain Kangsang (Inner Tibet)	Chevalier et al. (2011)	Chev2011-A	Chev2011-001	T5C-58	17.46	0.34	1.54	2.3716	7	18.3957	0.980134	0.0532805	7.57406	33.6261	5.60435	1.05828	1	7	18.3957	0.980134	0.0532805	4.43646	0.241168	No Rejection	33.6261	5.60435
	Chevalier et al. (2011)	Chev2011-A	Chev2011-002	T5C-59	17.82	0.34	1.57	2.4649	7	18.3957	0.980134	0.0532805	2.86719			0.615443	1	7	18.3957					No Rejection
	Chevalier et al. (2011)	Chev2011-A	Chev2011-003	T5C-60	18.45	0.33	1.62	2.6244	7	18.3957	0.980134	0.0532805	0.027061			0.0563993	1	7	18.3957					No Rejection
	Chevalier et al. (2011)	Chev2011-A	Chev2011-004	T5C-61	17.26	0.36	1.52	2.3104	7	18.3957	0.980134	0.0532805	9.95252			1.33748	1	7	18.3957					No Rejection
	Chevalier et al. (2011)	Chev2011-A	Chev2011-005	T5C-62	18.5	0.53	1.67	2.7889	7	18.3957	0.980134	0.0532805	0.0387167			0.101702	1	7	18.3957					No Rejection
	Chevalier et al. (2011)	Chev2011-A	Chev2011-006	T5C-63	19.36	0.49	1.73	2.9929	7	18.3957	0.980134	0.0532805	3.87275			1.03744	1	7	18.3957					No Rejection
	Chevalier et al. (2011)	Chev2011-A	Chev2011-007	T5C-64	19.92	0.5	1.78	3.1684	7	18.3957	0.980134	0.0532805	9.29379			1.91689	1	7	18.3957					No Rejection
W Himalaya	Chevalier et al. (2011)	Chev2011-AB	Chev2011-205	CK-40	144.85	2.89	13.15	172.923	7	159.524	29.4105	0.184364	25.7821	827.083	137.847	0.542446	1	6	152.035	23.808	0.156596	41.9148	0.275692	6.18099	368.999	73.7998
	Chevalier et al. (2011)	Chev2011-AB	Chev2011-206	CK-43	132.03	3.15	12.07	145.685	7	159.524	29.4105	0.184364	76.184			1.08656	1	6	152.035					40.3326
	Chevalier et al. (2011)	Chev2011-AB	Chev2011-207	CK-44	189.83	4.2	17.51	306.6	7	159.524	29.4105	0.184364	52.0656			1.21897	1	6	152.035					80.9786
	Chevalier et al. (2011)	Chev2011-AB	Chev2011-208	CK-45	159.14	3.24	14.51	210.54	7	159.524	29.4105	0.184364	0.0140675			0.0138462	1	6	152.035					4.80882
	Chevalier et al. (2011)	Chev2011-AB	Chev2011-209	CK-46	204.46	2.59	18.56	344.474	7	159.524	29.4105	0.184364	301.012			2.18907	0	6	152.035					0
	Chevalier et al. (2011)	Chev2011-AB	Chev2011-210	CK-47	123.86	1.85	11.06	122.324	7	159.524	29.4105	0.184364	371.641			1.52481	1	6	152.035					231.945
	Chevalier et al. (2011)	Chev2011-AB	Chev2011-211	CK-48	162.5	4.8	15.23	231.953	7	159.524	29.4105	0.184364	0.384326			0.106684	1	6	152.035					4.75331
	Chevalier et al. (2011)	Chev2011-AC	Chev2011-212	CK-50	17.27	0.47	1.55	2.4025	3	65.1667	43.7135	0.670795	10385.2	10846.1	5423.03	3.68158	0	2	89.115	19.5091	0.21892	22.5951	0.25355	0	137.971	137.971
	Chevalier et al. (2011)	Chev2011-AC	Chev2011-213	CK-52	102.91	1.85	9.2	84.64	3	65.1667	43.7135	0.670795	416.234			1.37786	1	2	89.115					55.6032
	Chevalier et al. (2011)	Chev2011-AC	Chev2011-214	CK-53	75.32	1.52	6.73	45.2929	3	65.1667	43.7135	0.670795	44.6201			0.251421	1	2	89.115					82.3676
	Chevalier et al. (2011)	Chev2011-AD	Chev2011-215	CK-54	61.34	1.48	5.52	30.4704	8	59.12	21.8996	0.370427	2.25	2856.48	408.068	0.107139	1	8	59.12	21.8996	0.370427	27.2391	0.460742	No Rejection	2856.48	408.068
	Chevalier et al. (2011)	Chev2011-AD	Chev2011-216	CK-55	42.77	0.86	3.79	14.3641	8	59.12	21.8996	0.370427	361.442			0.827947	1	8	59.12					No Rejection
	Chevalier et al. (2011)	Chev2011-AD	Chev2011-217	CK-56	52.8	1.28	4.74	22.4676	8	59.12	21.8996	0.370427	24.3789			0.306993	1	8	59.12					No Rejection
	Chevalier et al. (2011)	Chev2011-AD	Chev2011-218	CK-57	82.86	1.72	7.42	55.0564	8	59.12	21.8996	0.370427	190.504			1.27175	1	8	59.12					No Rejection
	Chevalier et al. (2011)	Chev2011-AD	Chev2011-219	CK-58	26.68	0.73	2.41	5.8081	8	59.12	21.8996	0.370427	1974.77			1.95504	1	8	59.12					No Rejection
	Chevalier et al. (2011)	Chev2011-AD	Chev2011-220	CK-60	41.45	1.53	3.89	15.1321	8	59.12	21.8996	0.370427	133.38			0.900961	1	8	59.12					No Rejection
	Chevalier et al. (2011)	Chev2011-AD	Chev2011-221	CK-61	85.75	2.35	7.84	61.4656	8	59.12	21.8996	0.370427	128.412			1.46772	1	8	59.12					No Rejection
	Chevalier et al. (2011)	Chev2011-AD	Chev2011-222	CK-63	79.31	3.14	7.59	57.6081	8	59.12	21.8996	0.370427	41.3441			1.04054	1	8	59.12					No Rejection
Samdain Kangsang (Inner Tibet)	Chevalier et al. (2011)	Chev2011-B	Chev2011-008	T5C-66	23.79	0.6	2.13	4.5369	8	20.49	1.83037	0.08933	30.25	74.6193	10.6599	2.54597	0	7	20.0186	1.35438	0.0676562	4.96623	0.248081	0	32.0943	5.34905
	Chevalier et al. (2011)	Chev2011-B	Chev2011-009	T5C-67	20.47	0.51	1.83	3.3489	8	20.49	1.83037	0.08933	0.00153787			0.011195	1	7	20.0186					0.783498
	Chevalier et al. (2011)	Chev2011-B	Chev2011-010	T5C-68	19.96	0.53	1.79	3.2041	8	20.49	1.83037	0.08933	1			0.297835	1	7	20.0186					0.0122129
	Chevalier et al. (2011)	Chev2011-B	Chev2011-011	T5C-69	19.72	0.49	1.76	3.0976	8	20.49	1.83037	0.08933	2.46939			0.438044	1	7	20.0186					0.371282
	Chevalier et al. (2011)	Chev2011-B	Chev2011-012	T5C-70	19.63	0.61	1.79	3.2041	8	20.49	1.83037	0.08933	1.98764			0.483056	1	7	20.0186					0.405772
	Chevalier et al. (2011)	Chev2011-B	Chev2011-013	T5C-71	22.71	0.71	2.08	4.3264	8	20.49	1.83037	0.08933	9.77663			1.36123	1	7	20.0186					14.3697
	Chevalier et al. (2011)	Chev2011-B	Chev2011-014	T5C-72	18.35	0.45	1.64	2.6896	8	20.49	1.83037	0.08933	22.6153			1.35898	1	7	20.0186					13.7488
	Chevalier et al. (2011)	Chev2011-B	Chev2011-015	T5C-73	19.29	0.47	1.72	2.9584	8	20.49	1.83037	0.08933	6.51879			0.698469	1	7	20.0186					2.40297
Nyainqentanghla (Inner Tibet)	Chevalier et al. (2011)	Chev2011-C	Chev2011-016	T5C-19	12.04	0.33	1.08	1.1664	5	15.468	4.75344	0.307308	107.908	785.767	196.442	0.85124	1	4	13.505	2.1066	0.155987	3.1977	0.236779	19.7082	167.069	55.6897
	Chevalier et al. (2011)	Chev2011-C	Chev2011-017	T5C-20	14.46	0.29	1.27	1.6129	5	15.468	4.75344	0.307308	12.0816			0.230862	1	4	13.505					10.8445
	Chevalier et al. (2011)	Chev2011-C	Chev2011-018	T5C-21	11.51	0.23	1.01	1.0201	5	15.468	4.75344	0.307308	296.139			1.0173	1	4	13.505					75.2368
	Chevalier et al. (2011)	Chev2011-C	Chev2011-019	T5C-22	23.32	0.41	2.04	4.1616	5	15.468	4.75344	0.307308	366.769			4.57335	0	4	13.505					0
	Chevalier et al. (2011)	Chev2011-C	Chev2011-020	T5C-23	16.01	0.32	1.41	1.9881	5	15.468	4.75344	0.307308	2.86879			0.123474	1	4	13.505					61.2795
	Chevalier et al. (2011)	Chev2011-D	Chev2011-021	T5C-25	37.99	0.69	3.35	11.2225	10	35.01	13.079	0.37358	18.6524	4226.64	469.627	0.239154	1	9	31.7067	8.34766	0.263278	12.0365	0.379619	82.9243	2454.44	306.805
	Chevalier et al. (2011)	Chev2011-D	Chev2011-022	T5C-26	31.1	0.56	2.73	7.4529	10	35.01	13.079	0.37358	48.7503			0.314655	1	9	31.7067					1.17361
	Chevalier et al. (2011)	Chev2011-D	Chev2011-023	T5C-27	25.44	0.5	2.24	5.0176	10	35.01	13.079	0.37358	366.34			0.79262	1	9	31.7067					157.084
	Chevalier et al. (2011)	Chev2011-D	Chev2011-024	T5C-28	36.36	0.95	3.27	10.6929	10	35.01	13.079	0.37358	2.01939			0.107946	1	9	31.7067					23.9928
	Chevalier et al. (2011)	Chev2011-D	Chev2011-025	T5C-29	42.56	0.99	3.8	14.44	10	35.01	13.079	0.37358	58.1599			0.615921	1	9	31.7067					120.187
	Chevalier et al. (2011)	Chev2011-D	Chev2011-026	T5C-30	64.74	1.41	5.79	33.5241	10	35.01	13.079	0.37358	444.582			3.90193	0	9	31.7067					0
	Chevalier et al. (2011)	Chev2011-D	Chev2011-027	T5C-31	21.18	0.4	1.86	3.4596	10	35.01	13.079	0.37358	1195.43			1.19255	1	9	31.7067					692.567
	Chevalier et al. (2011)	Chev2011-D	Chev2011-028	T5C-32	19.43	0.35	1.7	2.89	10	35.01	13.079	0.37358	1981.52			1.3735	1	9	31.7067					1230.34
	Chevalier et al. (2011)	Chev2011-D	Chev2011-029	T5C-33	30.84	0.56	2.71	7.3441	10	35.01	13.079	0.37358	55.4493			0.335835	1	9	31.7067					2.39512
	Chevalier et al. (2011)	Chev2011-D	Chev2011-030	T5C-34	40.46	0.73	3.56	12.6736	10	35.01	13.079	0.37358	55.7375			0.440651	1	9	31.7067					143.781
	Chevalier et al. (2011)	Chev2011-E	Chev2011-031	T5C-35	21.34	0.38	1.87	3.4969	10	50.321	14.0831	0.279865	5816.47	7865.17	873.907	3.11859	0	9	53.5411	10.3186	0.192722	17.8034	0.332518	0	2553.74	319.217
	Chevalier et al. (2011)	Chev2011-E	Chev2011-032	T5C-36	56.6	1.22	5.05	25.5025	10	50.321	14.0831	0.279865	26.4887			0.471291	1	9	53.5411					6.28648
	Chevalier et al. (2011)	Chev2011-E	Chev2011-033	T5C-37	52.08	0.93	4.6	21.16	10	50.321	14.0831	0.279865	3.57739			0.130715	1	9	53.5411					2.46832
	Chevalier et al. (2011)	Chev2011-E	Chev2011-034	T5C-38	63.84	1.12	5.65	31.9225	10	50.321	14.0831	0.279865	145.698			1.06483	1	9	53.5411					84.5561
	Chevalier et al. (2011)	Chev2011-E	Chev2011-035	T5C-39	45.1	0.8	3.98	15.8404	10	50.321	14.0831	0.279865	42.5919			0.391129	1	9	53.5411					111.332
	Chevalier et al. (2011)	Chev2011-E	Chev2011-036	T5C-40	51.54	0.98	4.56	20.7936	10	50.321	14.0831	0.279865	1.54723			0.0905221	1	9	53.5411					4.16956
	Chevalier et al. (2011)	Chev2011-E	Chev2011-037	T5C-41	54.85	0.97	4.85	23.5225	10	50.321	14.0831	0.279865	21.8002			0.338338	1	9	53.5411					1.8208
	Chevalier et al. (2011)	Chev2011-E	Chev2011-038	T5C-42	64.19	1.21	5.7	32.49	10	50.321	14.0831	0.279865	131.377			1.09549	1	9	53.5411					77.4529
	Chevalier et al. (2011)	Chev2011-E	Chev2011-039	T5C-43	31.77	0.46	2.77	7.6729	10	50.321	14.0831	0.279865	1626.37			1.55574	1	9	53.5411					2239.99
	Chevalier et al. (2011)	Chev2011-E	Chev2011-040	T5C-44	61.9	1.65	5.62	31.5844	10	50.321	14.0831	0.279865	49.2464			0.89373	1	9	53.5411					25.6643
Xainza (Inner Tibet)	Chevalier et al. (2011)	Chev2011-G	Chev2011-044	T7C-11	155.04	1.22	13.82	190.992	3	87.1733	59.05	0.677386	3094.52	8196.4	4098.2	12.4865	0	2	53.24	8.06102	0.151409	10.4361	0.196019	0	135.555	135.555
	Chevalier et al. (2011)	Chev2011-G	Chev2011-045	T7C-15	58.94	0.73	5.16	26.6256	3	87.1733	59.05	0.677386	1495.82			0.557109	1	2	53.24					60.9683
	Chevalier et al. (2011)	Chev2011-G	Chev2011-047	T7C-18	47.54	0.66	4.16	17.3056	3	87.1733	59.05	0.677386	3606.06			0.874829	1	2	53.24					74.5868
	Chevalier et al. (2011)	Chev2011-J	Chev2011-050	T7C-19	304.18	4.18	28.35	803.723	4	432.623	240.333	0.555526	944.202	11038.8	3679.59	0.622612	1	3	320.75	107.457	0.335019	120.434	0.375477	15.7142	2315.62	1157.81
	Chevalier et al. (2011)	Chev2011-J	Chev2011-052	T7C-21	435.53	4.36	41.76	1743.9	4	432.623	240.333	0.555526	0.444699			0.0131694	1	3	320.75					693.042
	Chevalier et al. (2011)	Chev2011-J	Chev2011-053	T7C-22	768.24	6.41	80.21	6433.64	4	432.623	240.333	0.555526	2741.4			4.15696	0	3	320.75					0
	Chevalier et al. (2011)	Chev2011-J	Chev2011-054	T7C-23	222.54	2.45	20.24	409.658	4	432.623	240.333	0.555526	7352.71			1.17097	1	3	320.75					1606.86
	Chevalier et al. (2011)	Chev2011-K	Chev2011-056	T7C-25	45.5	0.69	3.99	15.9201	5	46.12	2.90968	0.0630894	0.807393	85.0078	21.252	0.227506	1	4	47.2175	1.80507	0.0382289	8.45479	0.17906	6.19577	22.38	7.45999
	Chevalier et al. (2011)	Chev2011-K	Chev2011-057	T7C-26	45.94	0.55	4	16	5	46.12	2.90968	0.0630894	0.107107			0.0661269	1	4	47.2175					5.39506
	Chevalier et al. (2011)	Chev2011-K	Chev2011-058	T7C-27	49.31	0.74	4.33	18.7489	5	46.12	2.90968	0.0630894	18.5831			1.44681	1	4	47.2175					7.9959
	Chevalier et al. (2011)	Chev2011-K	Chev2011-059	T7C-28	41.73	0.61	3.65	13.3225	5	46.12	2.90968	0.0630894	51.7928			2.88004	0	4	47.2175					0
	Chevalier et al. (2011)	Chev2011-K	Chev2011-060	T7C-30	48.12	0.54	4.19	17.5561	5	46.12	2.90968	0.0630894	13.7174			0.79402	1	4	47.2175					2.79323
	Chevalier et al. (2011)	Chev2011-L	Chev2011-061	T7C-32	17.54	0.25	1.52	2.3104	7	14.2143	1.72139	0.121103	176.966	283.827	47.3045	3.80909	0	6	13.66	0.987461	0.0722885	3.11088	0.227737	0	71.5898	14.318
	Chevalier et al. (2011)	Chev2011-L	Chev2011-062	T7C-33	12.57	0.27	1.11	1.2321	7	14.2143	1.72139	0.121103	37.0875			1.10794	1	6	13.66					16.2977
	Chevalier et al. (2011)	Chev2011-L	Chev2011-063	T7C-34	12.76	0.21	1.11	1.2321	7	14.2143	1.72139	0.121103	47.958			0.962641	1	6	13.66					18.3673
	Chevalier et al. (2011)	Chev2011-L	Chev2011-064	T7C-35	14.4	0.24	1.26	1.5876	7	14.2143	1.72139	0.121103	0.598781			0.114108	1	6	13.66					9.50694
	Chevalier et al. (2011)	Chev2011-L	Chev2011-065	T7C-36	13.22	0.3	1.17	1.3689	7	14.2143	1.72139	0.121103	10.9845			0.6277	1	6	13.66					2.15111
	Chevalier et al. (2011)	Chev2011-L	Chev2011-066	T7C-37	13.91	0.32	1.23	1.5129	7	14.2143	1.72139	0.121103	0.904197			0.186157	1	6	13.66					0.610352
	Chevalier et al. (2011)	Chev2011-L	Chev2011-067	T7C-39	15.1	0.29	1.33	1.7689	7	14.2143	1.72139	0.121103	9.32806			0.555774	1	6	13.66					24.6564
	Chevalier et al. (2011)	Chev2011-M	Chev2011-068	T7C-40	54.57	0.61	4.76	22.6576	11	38.0609	14.241	0.374164	732.465	18692.7	1869.27	1.30922	1	11	38.0609	14.241	0.374164	18.4282	0.484177	No Rejection	18692.7	1869.27
	Chevalier et al. (2011)	Chev2011-M	Chev2011-069	T7C-41	49	0.63	4.28	18.3184	11	38.0609	14.241	0.374164	301.496			0.828166	1	11	38.0609					No Rejection
	Chevalier et al. (2011)	Chev2011-M	Chev2011-070	T7C-42	37.41	0.46	3.26	10.6276	11	38.0609	14.241	0.374164	2.00228			0.0476803	1	11	38.0609					No Rejection
	Chevalier et al. (2011)	Chev2011-M	Chev2011-071	T7C-43	16.93	0.25	1.47	2.1609	11	38.0609	14.241	0.374164	7144.25			1.7784	1	11	38.0609					No Rejection
	Chevalier et al. (2011)	Chev2011-M	Chev2011-072	T7C-44	47.18	0.78	4.15	17.2225	11	38.0609	14.241	0.374164	136.683			0.682863	1	11	38.0609					No Rejection
	Chevalier et al. (2011)	Chev2011-M	Chev2011-073	T7C-45	24.15	0.31	2.1	4.41	11	38.0609	14.241	0.374164	2013.67			1.07722	1	11	38.0609					No Rejection
	Chevalier et al. (2011)	Chev2011-M	Chev2011-074	T7C-46	59.39	0.6	5.18	26.8324	11	38.0609	14.241	0.374164	1263.69			1.79893	1	11	38.0609					No Rejection
	Chevalier et al. (2011)	Chev2011-M	Chev2011-075	T7C-47	39.79	0.4	3.45	11.9025	11	38.0609	14.241	0.374164	18.686			0.126762	1	11	38.0609					No Rejection
	Chevalier et al. (2011)	Chev2011-M	Chev2011-076	T7C-49	17.13	0.25	1.49	2.2201	11	38.0609	14.241	0.374164	7009.65			1.75629	1	11	38.0609					No Rejection
	Chevalier et al. (2011)	Chev2011-M	Chev2011-077	T7C-50	38.98	0.5	3.4	11.56	11	38.0609	14.241	0.374164	3.37891			0.0673271	1	11	38.0609					No Rejection
	Chevalier et al. (2011)	Chev2011-M	Chev2011-078	T7C-51	34.14	0.48	2.98	8.8804	11	38.0609	14.241	0.374164	66.7254			0.288373	1	11	38.0609					No Rejection
	Chevalier et al. (2011)	Chev2011-N	Chev2011-079	T7C-63	30.44	0.39	2.65	7.0225	9	32.1633	2.82302	0.0877714	19.5258	266.756	33.3445	0.654194	1	8	31.4612	2.00945	0.0638707	8.12098	0.258126	6.85701	153.891	21.9845
	Chevalier et al. (2011)	Chev2011-N	Chev2011-080	T7C-64	28.78	0.39	2.5	6.25	9	32.1633	2.82302	0.0877714	75.2593			1.39728	1	8	31.4612					47.2656
	Chevalier et al. (2011)	Chev2011-N	Chev2011-081	T7C-65	32.42	0.46	2.83	8.0089	9	32.1633	2.82302	0.0877714	0.311332			0.0946393	1	8	31.4612					4.34405
	Chevalier et al. (2011)	Chev2011-N	Chev2011-082	T7C-66	31.3	0.75	2.8	7.84	9	32.1633	2.82302	0.0877714	1.32506			0.314278	1	8	31.4612					0.046225
	Chevalier et al. (2011)	Chev2011-N	Chev2011-083	T7C-68	33.36	0.42	2.9	8.41	9	32.1633	2.82302	0.0877714	8.11798			0.447405	1	8	31.4612					20.4379
	Chevalier et al. (2011)	Chev2011-N	Chev2011-084	T7C-69	33.45	0.94	3.03	9.1809	9	32.1633	2.82302	0.0877714	1.8736			0.464155	1	8	31.4612					4.47615
	Chevalier et al. (2011)	Chev2011-N	Chev2011-085	T7C-70	28.62	0.35	2.49	6.2001	9	32.1633	2.82302	0.0877714	102.492			1.48429	1	8	31.4612					65.8996
	Chevalier et al. (2011)	Chev2011-N	Chev2011-086	T7C-71	33.32	0.87	3	9	9	32.1633	2.82302	0.0877714	1.76758			0.418891	1	8	31.4612					4.56461
	Chevalier et al. (2011)	Chev2011-N	Chev2011-087	T7C-72	37.78	0.75	3.34	11.1556	9	32.1633	2.82302	0.0877714	56.0835			2.946	0	8	31.4612					0
	Chevalier et al. (2011)	Chev2011-O	Chev2011-088	T7C-55	13.34	0.22	1.16	1.3456	8	29.0462	22.278	0.766983	5096.82	12320.9	1760.13	0.778168	1	7	21.6771	8.49656	0.391959	10.0399	0.463154	1436.11	3427.41	571.235
	Chevalier et al. (2011)	Chev2011-O	Chev2011-089	T7C-56	28.95	0.55	2.55	6.5025	8	29.0462	22.278	0.766983	0.030625			0.00457015	1	7	21.6771					174.858
	Chevalier et al. (2011)	Chev2011-O	Chev2011-090	T7C-57	17.75	0.31	1.55	2.4025	8	29.0462	22.278	0.766983	1327.84			0.548089	1	7	21.6771					160.483
	Chevalier et al. (2011)	Chev2011-O	Chev2011-091	T7C-58	16.48	0.38	1.46	2.1316	8	29.0462	22.278	0.766983	1093.56			0.612879	1	7	21.6771					187.052
	Chevalier et al. (2011)	Chev2011-O	Chev2011-092	T7C-59	37.16	0.42	3.23	10.4329	8	29.0462	22.278	0.766983	373.203			0.389539	1	7	21.6771					1358.95
	Chevalier et al. (2011)	Chev2011-O	Chev2011-093	T7C-60	16.33	0.51	1.49	2.2201	8	29.0462	22.278	0.766983	621.696			0.620538	1	7	21.6771					109.927
	Chevalier et al. (2011)	Chev2011-O	Chev2011-094	T7C-61	21.73	0.32	1.89	3.5721	8	29.0462	22.278	0.766983	522.73			0.35055	1	7	21.6771					0.027284
	Chevalier et al. (2011)	Chev2011-O	Chev2011-095	T7C-62	80.63	0.9	7.08	50.1264	8	29.0462	22.278	0.766983	3285.04			6.89984	0	7	21.6771					0
Ama Drime (E Himalaya)	Chevalier et al. (2011)	Chev2011-S	Chev2011-120	T5C-127	16.31	0.4	1.45	2.1025	3	29.0967	19.6396	0.674976	1021.87	1778.98	889.491	0.83602	1	2	17.79	2.09304	0.117652	3.07273	0.172723	13.69	23.1969	23.1969
	Chevalier et al. (2011)	Chev2011-S	Chev2011-122	T5C-130	51.71	1.23	4.64	21.5296	3	29.0967	19.6396	0.674976	338.002			13.9721	0	2	17.79					0
	Chevalier et al. (2011)	Chev2011-S	Chev2011-124	T5C-132	19.27	0.48	1.72	2.9584	3	29.0967	19.6396	0.674976	419.112			0.588748	1	2	17.79					9.50694
Cho Oyu (E Himalaya)	Chevalier et al. (2011)	Chev2011-U	Chev2011-132	KC2-A	33.19	0.85	2.98	8.8804	4	34.49	2.52683	0.0732627	2.3391	19.9276	6.64252	0.572299	1	3	33.2267	0.0351188	0.00105695	5.17318	0.155694	0.00186082	0.00334315	0.00167157
	Chevalier et al. (2011)	Chev2011-U	Chev2011-133	KC2-B	33.23	0.88	2.99	8.9401	4	34.49	2.52683	0.0732627	2.0501			0.551092	1	3	33.2267					1.4348e-05
	Chevalier et al. (2011)	Chev2011-U	Chev2011-134	KC2-D	38.28	1.03	3.46	11.9716	4	34.49	2.52683	0.0732627	13.5395			4.9033	0	3	33.2267					0
	Chevalier et al. (2011)	Chev2011-U	Chev2011-135	KC2-E	33.26	0.87	2.99	8.9401	4	34.49	2.52683	0.0732627	1.99881			0.537039	1	3	33.2267					0.00146798
Gurla Mandhata (W Himalaya)	Chevalier et al. (2011)	Chev2011-W	Chev2011-154	KC2-45	59.14	1.48	5.33	28.4089	4	41.9425	16.2705	0.387925	135.023	1318.18	439.392	1.61288	1	3	48.35	12.2784	0.253948	14.5625	0.30119	53.152	285.469	142.735
	Chevalier et al. (2011)	Chev2011-W	Chev2011-155	KC2-46	50.92	1.9	4.8	23.04	4	41.9425	16.2705	0.387925	22.3256			0.642606	1	3	48.35					1.82961
	Chevalier et al. (2011)	Chev2011-W	Chev2011-156	KC2-47	22.72	0.58	2.04	4.1616	4	41.9425	16.2705	0.387925	1098.41			2.08508	0	3	48.35					0
	Chevalier et al. (2011)	Chev2011-W	Chev2011-159	KC2-50	34.99	0.88	3.14	9.8596	4	41.9425	16.2705	0.387925	62.419			0.484786	1	3	48.35					230.488
Kailas (C Himalaya)	Chevalier et al. (2011)	Chev2011-X	Chev2011-169	KC2-66	14.81	0.66	1.43	2.0449	8	17.4425	1.85177	0.106164	15.9092	86.6141	12.3734	1.70432	1	8	17.4425	1.85177	0.106164	4.89664	0.28073	No Rejection	86.6141	12.3734
	Chevalier et al. (2011)	Chev2011-X	Chev2011-170	KC2-67	19.32	0.8	1.84	3.3856	8	17.4425	1.85177	0.106164	5.50782			1.07702	1	8	17.4425					No Rejection
	Chevalier et al. (2011)	Chev2011-X	Chev2011-171	KC2-69	19.15	0.55	1.73	2.9929	8	17.4425	1.85177	0.106164	9.6382			1.00802	1	8	17.4425					No Rejection
	Chevalier et al. (2011)	Chev2011-X	Chev2011-172	KC2-70	16.07	0.41	1.44	2.0736	8	17.4425	1.85177	0.106164	11.2062			0.80362	1	8	17.4425					No Rejection
	Chevalier et al. (2011)	Chev2011-X	Chev2011-173	KC2-71	15.33	0.43	1.38	1.9044	8	17.4425	1.85177	0.106164	24.1355			1.32194	1	8	17.4425					No Rejection
	Chevalier et al. (2011)	Chev2011-X	Chev2011-174	KC2-72	18.87	0.56	1.71	2.9241	8	17.4425	1.85177	0.106164	6.49795			0.823364	1	8	17.4425					No Rejection
	Chevalier et al. (2011)	Chev2011-X	Chev2011-175	KC2-73	18.9	0.4	1.67	2.7889	8	17.4425	1.85177	0.106164	13.2769			0.859492	1	8	17.4425					No Rejection
	Chevalier et al. (2011)	Chev2011-X	Chev2011-176	KC2-74	17.09	0.53	1.56	2.4336	8	17.4425	1.85177	0.106164	0.44235			0.195236	1	8	17.4425					No Rejection
	Chevalier et al. (2011)	Chev2011-Y	Chev2011-177	Zi-85	49.69	0.86	4.38	19.1844	14	44.5993	12.9219	0.289734	35.0397	5324.24	409.557	0.409418	1	13	46.5315	11.1474	0.239567	19.2281	0.413227	13.4882	2403.69	200.308
	Chevalier et al. (2011)	Chev2011-Y	Chev2011-178	Zi-86	47.15	0.82	4.16	17.3056	14	44.5993	12.9219	0.289734	9.676			0.204189	1	13	46.5315					0.56885
	Chevalier et al. (2011)	Chev2011-Y	Chev2011-179	Zi-87	43.13	1.37	3.97	15.7609	14	44.5993	12.9219	0.289734	1.15019			0.117104	1	13	46.5315					6.16467
	Chevalier et al. (2011)	Chev2011-Y	Chev2011-180	Zi-88	63.06	1.1	5.58	31.1364	14	44.5993	12.9219	0.289734	281.651			1.61511	1	13	46.5315					225.777
	Chevalier et al. (2011)	Chev2011-Y	Chev2011-181	Zi-89	48.8	1.04	4.34	18.8356	14	44.5993	12.9219	0.289734	16.3147			0.336824	1	13	46.5315					4.75769
	Chevalier et al. (2011)	Chev2011-Y	Chev2011-182	Zi-90	41.57	1.44	3.86	14.8996	14	44.5993	12.9219	0.289734	4.42543			0.241724	1	13	46.5315					11.8716
	Chevalier et al. (2011)	Chev2011-Y	Chev2011-183	Zi91	47.9	1.05	4.27	18.2329	14	44.5993	12.9219	0.289734	9.88183			0.264201	1	13	46.5315					1.69858
	Chevalier et al. (2011)	Chev2011-Y	Chev2011-184	Zi-92	44.7	1.94	4.32	18.6624	14	44.5993	12.9219	0.289734	0.00269512			0.00798172	1	13	46.5315					0.89131
	Chevalier et al. (2011)	Chev2011-Y	Chev2011-185	Zi-93	24.88	0.52	2.2	4.84	14	44.5993	12.9219	0.289734	1438.06			1.75592	1	13	46.5315					1733.69
	Chevalier et al. (2011)	Chev2011-Y	Chev2011-186	Zi-94	52.62	2.62	5.25	27.5625	14	44.5993	12.9219	0.289734	9.37181			0.640299	1	13	46.5315					5.40023
	Chevalier et al. (2011)	Chev2011-Y	Chev2011-187	Zi95	59.26	1.09	5.25	27.5625	14	44.5993	12.9219	0.289734	180.908			1.23744	1	13	46.5315					136.364
	Chevalier et al. (2011)	Chev2011-Y	Chev2011-188	Zi-96	55.8	2.86	5.61	31.4721	14	44.5993	12.9219	0.289734	15.3377			0.904586	1	13	46.5315					10.5023
	Chevalier et al. (2011)	Chev2011-Y	Chev2011-189	Zi-98	26.35	1.27	2.6	6.76	14	44.5993	12.9219	0.289734	206.483			1.59085	1	13	46.5315					252.523
	Chevalier et al. (2011)	Chev2011-Y	Chev2011-190	Zi-99	19.48	0.45	1.73	2.9929	14	44.5993	12.9219	0.289734	3115.94			2.42473	0	13	46.5315					0
	Chevalier et al. (2011)	Chev2011-Z	Chev2011-191	KC2-75	37.95	0.85	3.38	11.4244	7	68.3886	91.1564	1.33292	1282.36	15749.1	2624.85	0.359531	1	6	34.0533	8.27989	0.243145	11.2478	0.330299	21.0159	537.523	107.505
	Chevalier et al. (2011)	Chev2011-Z	Chev2011-192	KC2-76	46.07	0.81	4.06	16.4836	7	68.3886	91.1564	1.33292	759.211			0.262281	1	6	34.0533					220.089
	Chevalier et al. (2011)	Chev2011-Z	Chev2011-193	KC2-77	26.15	0.74	2.37	5.6169	7	68.3886	91.1564	1.33292	3258.03			0.504111	1	6	34.0533					114.066
	Chevalier et al. (2011)	Chev2011-Z	Chev2011-194	KC2-78	274.4	3.43	25.34	642.116	7	68.3886	91.1564	1.33292	3607.4			26.8178	0	6	34.0533					0
	Chevalier et al. (2011)	Chev2011-Z	Chev2011-195	KC2-80	39.23	0.7	3.45	11.9025	7	68.3886	91.1564	1.33292	1735.15			0.344103	1	6	34.0533					54.6895
	Chevalier et al. (2011)	Chev2011-Z	Chev2011-196	KC2-82	29.33	0.72	2.62	6.8644	7	68.3886	91.1564	1.33292	2942.85			0.464694	1	6	34.0533					43.036
	Chevalier et al. (2011)	Chev2011-Z	Chev2011-197	KC2-83	25.59	0.92	2.38	5.6644	7	68.3886	91.1564	1.33292	2164.13			0.511084	1	6	34.0533					84.6267
Nyainqentanghla (Inner Tibet)	Dong et al. (2017a)	Dong2017a-A	Dong2017a-001	NQDGL15-01	20.95	1.39	2.27	5.1529	5	16.078	8.00915	0.498143	12.2853	5077.41	1269.35	0.691463	1	4	19.63	1.19049	0.0606465	4.41178	0.224747	0.901817	3.39496	1.13165
	Dong et al. (2017a)	Dong2017a-A	Dong2017a-002	NQDGL15-02	1.87	0.2	0.26	0.0676	5	16.078	8.00915	0.498143	5046.68			14.7121	0	4	19.63					0
	Dong et al. (2017a)	Dong2017a-A	Dong2017a-003	NQDGL15-05	19.4	1.35	2.14	4.5796	5	16.078	8.00915	0.498143	6.05524			0.456476	1	4	19.63					0.0290261
	Dong et al. (2017a)	Dong2017a-A	Dong2017a-004	NQDGL15-06	18.12	0.98	1.84	3.3856	5	16.078	8.00915	0.498143	4.3417			0.277263	1	4	19.63					2.37411
	Dong et al. (2017a)	Dong2017a-A	Dong2017a-005	NQDGL15-07	20.05	1.4	2.22	4.9284	5	16.078	8.00915	0.498143	8.04938			0.551956	1	4	19.63					0.09
	Dong et al. (2017a)	Dong2017a-B	Dong2017a-006	NQDGL15-08	19.07	0.86	1.85	3.4225	5	20.308	0.849718	0.0418415	2.07226	3.97258	0.993145	1.50045	1	5	20.308	0.849718	0.0418415	4.47121	0.22017	No Rejection	3.97258	0.993145
	Dong et al. (2017a)	Dong2017a-B	Dong2017a-007	NQDGL15-09	19.93	1.07	2.02	4.0804	5	20.308	0.849718	0.0418415	0.1248			0.330165	1	5	20.308					No Rejection
	Dong et al. (2017a)	Dong2017a-B	Dong2017a-008	NQDGL15-10	21.11	0.75	1.96	3.8416	5	20.308	0.849718	0.0418415	1.14347			0.894095	1	5	20.308					No Rejection
	Dong et al. (2017a)	Dong2017a-B	Dong2017a-009	NQDGL15-11	21.06	0.95	2.04	4.1616	5	20.308	0.849718	0.0418415	0.626597			0.736363	1	5	20.308					No Rejection
	Dong et al. (2017a)	Dong2017a-B	Dong2017a-010	NQDGL15-12	20.37	0.84	1.94	3.7636	5	20.308	0.849718	0.0418415	0.00544785			0.0600308	1	5	20.308					No Rejection
Xainza (Inner Tibet)	Dong et al. (2017b)	Dong2017b-A	Dong2017b-001	14XZ1-1	0.53	0.12	0.13	0.0169	4	0.3225	0.142215	0.440976	2.99002	9.06527	3.02176	2.18497	0	3	0.253333	0.0404145	0.159531	0.12261	0.483989	0	1.03456	0.517279
	Dong et al. (2017b)	Dong2017b-A	Dong2017b-002	14XZ1-3	0.26	0.07	0.07	0.0049	4	0.3225	0.142215	0.440976	0.797194			0.461305	1	3	0.253333					0.00907029
	Dong et al. (2017b)	Dong2017b-A	Dong2017b-003	14XZ1-4	0.21	0.05	0.06	0.0036	4	0.3225	0.142215	0.440976	5.0625			0.960277	1	3	0.253333					0.751111
	Dong et al. (2017b)	Dong2017b-A	Dong2017b-004	14XZ1-5	0.29	0.07	0.07	0.0049	4	0.3225	0.142215	0.440976	0.215561			0.233186	1	3	0.253333					0.274376
Jarai (Darhad)	Gillespie et al. (2008)	Gill2008-D	Gill2008-007	arg-Gar-Ia-001	23.37	0.56	2.08	4.3264	7	27.9643	11.3183	0.40474	67.307	1586	264.333	0.438943	1	6	25.1733	9.39643	0.373269	11.3777	0.451973	10.3699	476.104	95.2208
	Gillespie et al. (2008)	Gill2008-D	Gill2008-008	arg-Gar-Ia-002	20.8	0.51	1.86	3.4596	7	27.9643	11.3183	0.40474	197.336			0.701397	1	6	25.1733					73.5334
	Gillespie et al. (2008)	Gill2008-D	Gill2008-009	arg-Gar-Ia-003	23.72	0.45	2.09	4.3681	7	27.9643	11.3183	0.40474	88.9578			0.404676	1	6	25.1733					10.4305
	Gillespie et al. (2008)	Gill2008-D	Gill2008-010	arg-Gar-Ia-010	44.71	0.79	3.94	15.5236	7	27.9643	11.3183	0.40474	449.317			2.07185	0	6	25.1733					0
	Gillespie et al. (2008)	Gill2008-D	Gill2008-011	arg-Gar-Ia-011	43.99	2.92	4.79	22.9441	7	27.9643	11.3183	0.40474	30.121			1.84831	1	6	25.1733					41.526
	Gillespie et al. (2008)	Gill2008-D	Gill2008-012	arg-Gar-Ia-012	19.17	0.39	1.69	2.8561	7	27.9643	11.3183	0.40474	508.478			0.880338	1	6	25.1733					236.949
	Gillespie et al. (2008)	Gill2008-D	Gill2008-013	arg-Gar-Ia-013	19.99	0.51	1.79	3.2041	7	27.9643	11.3183	0.40474	244.48			0.788683	1	6	25.1733					103.295
	Gillespie et al. (2008)	Gill2008-E	Gill2008-014	arg-Gar-IIa-005	29.93	0.75	2.68	7.1824	3	23.09	6.08451	0.263513	83.1744	231.217	115.609	4.87649	0	2	19.67	1.96576	0.0999368	3.15335	0.160313	0	23.36	23.36
	Gillespie et al. (2008)	Gill2008-E	Gill2008-015	arg-Gar-IIa-007	18.28	0.44	1.63	2.6569	3	23.09	6.08451	0.263513	119.505			1.14752	1	2	19.67					9.97986
	Gillespie et al. (2008)	Gill2008-E	Gill2008-016	arg-Gar-IIa-008	21.06	0.38	1.85	3.4225	3	23.09	6.08451	0.263513	28.5381			0.369245	1	2	19.67					13.3802
Hogyin (Darhad)	Gillespie et al. (2008)	Gill2008-F	Gill2008-017	arg-Huj-01a	242.77	11.19	24.71	610.584	3	164.417	69.5288	0.422882	49.0292	892.247	446.123	4.85982	0	2	125.24	21.4395	0.171187	26.7843	0.213864	0	94.5282	94.5282
	Gillespie et al. (2008)	Gill2008-F	Gill2008-018	arg-Huj-01b	110.08	1.98	9.86	97.2196	3	164.417	69.5288	0.422882	753.105			1.12555	1	2	125.24					58.623
	Gillespie et al. (2008)	Gill2008-F	Gill2008-019	arg-Huj-01c	140.4	2.53	12.67	160.529	3	164.417	69.5288	0.422882	90.1124			0.383816	1	2	125.24					35.9052
	Gillespie et al. (2008)	Gill2008-G	Gill2008-020	arg-Huj-02a	16.22	0.54	1.49	2.2201	3	29.84	14.2523	0.477624	636.16	819.178	409.589	1.80372	1	2	22.435	8.78934	0.391769	9.29177	0.414164	132.463	180.15	180.15
	Gillespie et al. (2008)	Gill2008-G	Gill2008-021	arg-Huj-02b	44.65	1.1	4.01	16.0801	3	29.84	14.2523	0.477624	181.27			2.50793	0	2	22.435					0
	Gillespie et al. (2008)	Gill2008-G	Gill2008-022	arg-Huj-02c	28.65	0.9	2.62	6.8644	3	29.84	14.2523	0.477624	1.74827			0.0887037	1	2	22.435					47.6867
Bayan Har Shan (Inner Tibet)	Heyman et al. (2011)	Heym2011-C	Heym2011-004	TB-05-048	15.01	0.84	1.54	2.3716	3	16.2	4.21299	0.260061	2.00694	122.019	61.0093	0.305765	1	2	13.86	1.62635	0.117341	2.51776	0.181656	1.87429	11.5346	11.5346
	Heyman et al. (2011)	Heym2011-C	Heym2011-005	TB-05-049	12.71	0.37	1.15	1.3225	3	16.2	4.21299	0.260061	88.9708			1.25625	1	2	13.86					9.66034
	Heyman et al. (2011)	Heym2011-C	Heym2011-006	TB-05-050	20.88	0.84	1.98	3.9204	3	16.2	4.21299	0.260061	31.0408			3.83509	0	2	13.86					0
	Heyman et al. (2011)	Heym2011-D	Heym2011-008	TB-06-01	59.61	2.19	5.61	31.4721	4	62.4325	15.374	0.24625	1.66104	193.601	64.5337	0.200012	1	3	69.3067	8.4271	0.121591	14.0365	0.202527	19.6045	29.2099	14.605
	Heyman et al. (2011)	Heym2011-D	Heym2011-009	TB-06-02	74.86	2.07	6.83	46.6489	4	62.4325	15.374	0.24625	36.0435			1.0359	1	3	69.3067					7.19725
	Heyman et al. (2011)	Heym2011-D	Heym2011-010	TB-06-37	41.81	1.75	4.01	16.0801	4	62.4325	15.374	0.24625	138.869			3.19473	0	3	69.3067					0
	Heyman et al. (2011)	Heym2011-D	Heym2011-011	TB-07-125	73.45	2.67	6.92	47.8864	4	62.4325	15.374	0.24625	17.0272			0.876728	1	3	69.3067					2.40812
	Heyman et al. (2011)	Heym2011-G	Heym2011-019	TB-06-46	52.41	1.21	4.69	21.9961	3	71.34	24.9552	0.349807	244.754	367.381	183.69	1.06604	1	2	57.2	6.77408	0.118428	9.97904	0.174459	15.6711	23.8981	23.8981
	Heyman et al. (2011)	Heym2011-G	Heym2011-020	TB-06-47	61.99	1.67	5.63	31.6969	3	71.34	24.9552	0.349807	31.3466			0.419605	1	2	57.2					8.22694
	Heyman et al. (2011)	Heym2011-G	Heym2011-021	TB-06-48	99.62	2.96	9.21	84.8241	3	71.34	24.9552	0.349807	91.2799			5.73821	0	2	57.2					0
	Heyman et al. (2011)	Heym2011-H	Heym2011-022	TB-06-31	57.42	1.15	5.1	26.01	3	65.98	48.4307	0.734021	55.4054	2202	1101	0.189677	1	2	39.91	24.7629	0.620468	25.3747	0.635798	231.834	551.076	551.076
	Heyman et al. (2011)	Heym2011-H	Heym2011-023	TB-06-32	118.12	4.01	11.13	123.877	3	65.98	48.4307	0.734021	169.065			3.11774	0	2	39.91					0
	Heyman et al. (2011)	Heym2011-H	Heym2011-024	TB-06-33	22.4	0.98	2.16	4.6656	3	65.98	48.4307	0.734021	1977.53			1.52262	1	2	39.91					319.242
	Heyman et al. (2011)	Heym2011-I	Heym2011-025	TB-06-25	71.14	3.4	7.06	49.8436	3	56.6	25.4877	0.450313	18.2882	461.213	230.606	0.691879	1	2	71.315	0.247487	0.00347034	10.2523	0.143761	0.00264922	0.00449801	0.00449801
	Heyman et al. (2011)	Heym2011-I	Heym2011-026	TB-06-26	27.17	1.42	2.73	7.4529	3	56.6	25.4877	0.450313	429.54			30.6264	0	2	71.315					0
	Heyman et al. (2011)	Heym2011-I	Heym2011-027	TB-06-27	71.49	4.07	7.43	55.2049	3	56.6	25.4877	0.450313	13.3845			0.712287	1	2	71.315					0.00184879
	Heyman et al. (2011)	Heym2011-J	Heym2011-029	TB-07-31	54.79	1.18	4.89	23.9121	3	38.8967	23.3161	0.599437	181.412	2095.85	1047.92	0.89484	1	2	52.28	3.54968	0.0678974	7.49248	0.143314	4.52463	10.3494	10.3494
	Heyman et al. (2011)	Heym2011-J	Heym2011-030	TB-07-33	49.77	1.04	4.43	19.6249	3	38.8967	23.3161	0.599437	109.31			0.540369	1	2	52.28					5.8248
	Heyman et al. (2011)	Heym2011-J	Heym2011-031	TB-07-34	12.13	0.63	1.21	1.4641	3	38.8967	23.3161	0.599437	1805.13			11.1368	0	2	52.28					0
	Heyman et al. (2011)	Heym2011-L	Heym2011-036	TB-07-22	54.98	1.04	4.87	23.7169	3	34.0067	18.1773	0.534522	406.694	714.946	357.473	21.7624	0	2	23.52	1.00409	0.042691	3.25659	0.138461	0	1.41333	1.41333
	Heyman et al. (2011)	Heym2011-L	Heym2011-037	TB-07-23	22.81	0.86	2.14	4.5796	3	34.0067	18.1773	0.534522	169.504			0.77181	1	2	23.52					0.681585
	Heyman et al. (2011)	Heym2011-L	Heym2011-038	TB-07-24	24.23	0.83	2.24	5.0176	3	34.0067	18.1773	0.534522	138.748			0.644254	1	2	23.52					0.731746
	Heyman et al. (2011)	Heym2011-M	Heym2011-040	TB-07-38	16.04	0.63	1.51	2.2801	3	108.223	80.8519	0.747084	21410.3	21660.8	10830.4	7.63704	0	2	154.315	18.0949	0.117259	27.1982	0.176251	0	19.7005	19.7005
	Heyman et al. (2011)	Heym2011-M	Heym2011-041	TB-07-39	141.52	3.76	13.07	170.825	3	108.223	80.8519	0.747084	78.4198			0.467261	1	2	154.315					11.5799
	Heyman et al. (2011)	Heym2011-M	Heym2011-042	TB-07-40	167.11	4.49	15.54	241.492	3	108.223	80.8519	0.747084	172.005			0.994245	1	2	154.315					8.1206
	Heyman et al. (2011)	Heym2011-N	Heym2011-044	TB-07-92	65.28	0.94	5.74	32.9476	3	60.28	4.52395	0.0750489	28.2933	40.7441	20.372	3.61019	0	2	57.78	1.85262	0.0320633	7.46838	0.129255	0	3.08448	3.08448
	Heyman et al. (2011)	Heym2011-N	Heym2011-045	TB-07-93	56.47	1.15	5.02	25.2004	3	60.28	4.52395	0.0750489	10.9763			1.26283	1	2	57.78					1.29762
	Heyman et al. (2011)	Heym2011-N	Heym2011-046	TB-07-94	59.09	0.98	5.21	27.1441	3	60.28	4.52395	0.0750489	1.47449			0.283054	1	2	57.78					1.78686
	Heyman et al. (2011)	Heym2011-O	Heym2011-048	TB-07-117	39	0.78	3.45	11.9025	3	47.56	23.4714	0.493512	120.437	1595.15	797.575	0.407565	1	2	34.285	6.66802	0.194488	7.94512	0.231738	36.5405	112.779	112.779
	Heyman et al. (2011)	Heym2011-O	Heym2011-049	TB-07-118	29.57	0.54	2.6	6.76	3	47.56	23.4714	0.493512	1109.88			1.08669	1	2	34.285					76.2388
	Heyman et al. (2011)	Heym2011-O	Heym2011-050	TB-07-119	74.11	1.39	6.59	43.4281	3	47.56	23.4714	0.493512	364.837			5.84685	0	2	34.285					0
Baikal	Horiuchi et al. (2004)	Hori2004-A	Hori2004-001	SB-1	15.95	3.38	3.64	13.2496	3	15.08	0.762168	0.0505416	0.0662529	0.322676	0.161338	0.385649	1	3	15.08	0.762168	0.0505416	4.47153	0.296521	No Rejection	0.322676	0.161338
	Horiuchi et al. (2004)	Hori2004-A	Hori2004-002	SB-2	14.76	1.15	1.71	2.9241	3	15.08	0.762168	0.0505416	0.0774291			0.314411	1	3	15.08					No Rejection
	Horiuchi et al. (2004)	Hori2004-A	Hori2004-003	SB-3	14.53	1.3	1.8	3.24	3	15.08	0.762168	0.0505416	0.178994			0.532752	1	3	15.08					No Rejection
Ala Bash (W Tian Shan)	Koppes et al. (2008)	Kopp2008-J	Kopp2008-014	KTS98-CS-90	129.95	5.92	12.9	166.41	3	118.513	42.5926	0.359391	3.73212	820.594	410.297	0.291345	1	2	142.085	17.1615	0.120783	25.7349	0.181123	4.20181	14.7296	14.7296
	Koppes et al. (2008)	Kopp2008-J	Kopp2008-015	KTS98-CS-91	154.22	3.74	14.19	201.356	3	118.513	42.5926	0.359391	91.1497			1.28778	1	2	142.085					10.5278
	Koppes et al. (2008)	Kopp2008-J	Kopp2008-016	KTS98-CS-92	71.37	1.75	6.45	41.6025	3	118.513	42.5926	0.359391	725.712			4.09931	0	2	142.085					0
	Koppes et al. (2008)	Kopp2008-K	Kopp2008-017	KTS98-CS-93	97.25	2.69	8.92	79.5664	4	102.848	25.0468	0.243534	4.32996	414.299	138.1	0.24508	1	2	102.115	6.88015	0.0673765	14.9839	0.146736	3.27085	5.73373	5.73373
	Koppes et al. (2008)	Kopp2008-K	Kopp2008-018	KTS98-CS-94	106.98	3.1	9.88	97.6144	4	102.848	25.0468	0.243534	1.77706			0.179789	1	2	102.115					2.46287
	Koppes et al. (2008)	Kopp2008-K	Kopp2008-019	KTS98-CS-95	133.85	2.69	12.12	146.894	4	102.848	25.0468	0.243534	132.828			2.35736	0	2	102.115					0
	Koppes et al. (2008)	Kopp2008-K	Kopp2008-020	KTS98-CS-96	73.31	1.78	6.62	43.8244	4	102.848	25.0468	0.243534	275.364			2.0684	0	2	102.115					0
Borohoro (E Tian Shan)	Li et al. (2016)	Li2016-B	Li2016-006	HDB-12-11	0.2	0.03	0.04	0.0016	3	2.11333	3.15939	1.49498	4067.6	6536.41	3268.21	0.754399	1	2	0.29	0.127279	0.438894	0.142478	0.491304	9	14.0625	14.0625
	Li et al. (2016)	Li2016-B	Li2016-007	HDB-12-12	0.38	0.04	0.05	0.0025	3	2.11333	3.15939	1.49498	1877.78			0.661289	1	2	0.29					5.0625
	Li et al. (2016)	Li2016-B	Li2016-010	HDB-12-15	5.76	0.15	0.51	0.2601	3	2.11333	3.15939	1.49498	591.03			27.8056	0	2	0.29					0
Kalurong (Inner Tibet)	Liu et al. (2017)	Liu2017-B	Liu2017-004	TB-14-19	2.38	0.09	0.22	0.0484	4	10.6675	9.92071	0.929994	8479.34	15999	5333.01	1.09492	1	4	10.6675	9.92071	0.929994	10.2264	0.958653	No Rejection	15999	5333.01
	Liu et al. (2017)	Liu2017-B	Liu2017-005	TB-14-20	2.26	0.1	0.22	0.0484	4	10.6675	9.92071	0.929994	7068.61			1.11812	1	4	10.6675					No Rejection
	Liu et al. (2017)	Liu2017-B	Liu2017-006	TB-14-21	16.14	0.43	1.45	2.1025	4	10.6675	9.92071	0.929994	161.97			0.645318	1	4	10.6675					No Rejection
	Liu et al. (2017)	Liu2017-B	Liu2017-007	TB-14-22	21.89	0.66	1.99	3.9601	4	10.6675	9.92071	0.929994	289.129			1.86891	1	4	10.6675					No Rejection
	Liu et al. (2017)	Liu2017-C	Liu2017-008	TB-14-33	8.04	0.31	0.76	0.5776	3	17.07	7.84595	0.459634	848.501	946.827	473.414	14.2575	0	2	21.585	0.898026	0.0416042	2.92352	0.135442	0	2.11556	2.11556
	Liu et al. (2017)	Liu2017-C	Liu2017-009	TB-14-34	22.22	0.77	2.06	4.2436	3	17.07	7.84595	0.459634	44.7335			0.843233	1	2	21.585					0.680089
	Liu et al. (2017)	Liu2017-C	Liu2017-010	TB-14-36	20.95	0.53	1.87	3.4969	3	17.07	7.84595	0.459634	53.5934			0.579637	1	2	21.585					1.43548
	Liu et al. (2017)	Liu2017-D	Liu2017-011	TB-14-39	6.54	0.61	0.83	0.6889	3	13.3033	5.91092	0.444319	122.931	321.155	160.577	7.93123	0	2	16.685	1.1243	0.0673839	2.38903	0.143184	0	8.80446	8.80446
	Liu et al. (2017)	Liu2017-D	Liu2017-012	TB-14-41	17.48	0.32	1.53	2.3409	3	13.3033	5.91092	0.444319	170.357			0.946491	1	2	16.685					6.17212
	Liu et al. (2017)	Liu2017-D	Liu2017-013	TB-14-42	15.89	0.49	1.45	2.1025	3	13.3033	5.91092	0.444319	27.8669			0.500564	1	2	16.685					2.63234
Karola (Inner Tibet)	Liu et al. (2017)	Liu2017-E	Liu2017-014	KRLE-14-14	16.07	0.39	1.43	2.0449	4	5.49	7.52457	1.3706	735.94	301760	100587	4.36243	0	3	1.96333	3.21007	1.63501	3.24922	1.65495	0	36535.4	18267.7
	Liu et al. (2017)	Liu2017-E	Liu2017-015	KRLE-14-15	5.67	0.13	0.5	0.25	4	5.49	7.52457	1.3706	1.91716			0.0260433	1	3	1.96333					812.981
	Liu et al. (2017)	Liu2017-E	Liu2017-016	KRLE-14-19	0.11	0.05	0.05	0.0025	4	5.49	7.52457	1.3706	11577.8			0.885428	1	3	1.96333					1373.94
	Liu et al. (2017)	Liu2017-E	Liu2017-017	KRLE-14-25	0.11	0.01	0.02	0.0004	4	5.49	7.52457	1.3706	289444			0.885444	1	3	1.96333					34348.4
	Liu et al. (2017)	Liu2017-F	Liu2017-018	KRLE-14-43	0.2	0.01	0.02	0.0004	4	0.235	0.0619139	0.263463	12.25	43.6914	14.5638	0.657777	1	4	0.235	0.0619139	0.263463	0.10924	0.46485	No Rejection	43.6914	14.5638
	Liu et al. (2017)	Liu2017-F	Liu2017-019	KRLE-14-44	0.24	0.02	0.03	0.0009	4	0.235	0.0619139	0.263463	0.0625			0.0851257	1	4	0.235					No Rejection
	Liu et al. (2017)	Liu2017-F	Liu2017-020	KRLE-14-45	0.18	0.01	0.02	0.0004	4	0.235	0.0619139	0.263463	30.25			1.18444	1	4	0.235					No Rejection
	Liu et al. (2017)	Liu2017-F	Liu2017-021	KRLE-14-46	0.32	0.08	0.08	0.0064	4	0.235	0.0619139	0.263463	1.12891			1.32345	1	4	0.235					No Rejection
Tanggula Shan (Inner Tibet)	Owen et al. (2005)	Owen2005-L	Owen2005-039	PR62	58.53	1.53	5.3	28.09	4	61.2225	7.74968	0.126582	3.09691	147.585	49.195	0.383581	1	3	57.5167	2.77255	0.0482043	9.40957	0.163597	0.438654	9.21739	4.60869
	Owen et al. (2005)	Owen2005-L	Owen2005-040	PR63	59.64	0.9	5.25	27.5625	4	61.2225	7.74968	0.126582	3.09174			0.223375	1	3	57.5167					5.5661
	Owen et al. (2005)	Owen2005-L	Owen2005-041	PR64	54.38	1.75	5.02	25.2004	4	61.2225	7.74968	0.126582	15.2881			1.15927	1	3	57.5167					3.21263
	Owen et al. (2005)	Owen2005-L	Owen2005-042	PR65	72.34	0.99	6.37	40.5769	4	61.2225	7.74968	0.126582	126.108			5.0351	0	3	57.5167					0
	Owen et al. (2005)	Owen2005-M	Owen2005-043	PR66	135.99	4.03	12.67	160.529	5	98.924	47.9848	0.485067	84.5943	2290.15	572.538	0.924096	1	5	98.924	47.9848	0.485067	53.0396	0.536166	No Rejection	2290.15	572.538
	Owen et al. (2005)	Owen2005-M	Owen2005-044	PR67	139.34	4.38	13.07	170.825	5	98.924	47.9848	0.485067	85.1449			1.02939	1	5	98.924					No Rejection
	Owen et al. (2005)	Owen2005-M	Owen2005-045	PR68	125.13	4.13	11.77	138.533	5	98.924	47.9848	0.485067	40.2626			0.618953	1	5	98.924					No Rejection
	Owen et al. (2005)	Owen2005-M	Owen2005-046	PR69	38.7	1.48	3.65	13.3225	5	98.924	47.9848	0.485067	1655.83			1.90535	1	5	98.924					No Rejection
	Owen et al. (2005)	Owen2005-M	Owen2005-047	PR70	55.46	2.11	5.24	27.4576	5	98.924	47.9848	0.485067	424.321			1.13598	1	5	98.924					No Rejection
	Owen et al. (2005)	Owen2005-N	Owen2005-053	PR78	255.69	35.52	42.47	1803.7	5	140.906	86.4134	0.61327	10.4428	2023	505.751	1.89574	1	5	140.906	86.4134	0.61327	99.5002	0.706146	No Rejection	2023	505.751
	Owen et al. (2005)	Owen2005-N	Owen2005-054	PR79	150.3	4.73	14.14	199.94	5	140.906	86.4134	0.61327	3.94438			0.117767	1	5	140.906					No Rejection
	Owen et al. (2005)	Owen2005-N	Owen2005-055	PR80	55.43	2.91	5.61	31.4721	5	140.906	86.4134	0.61327	862.785			1.28435	1	5	140.906					No Rejection
	Owen et al. (2005)	Owen2005-N	Owen2005-056	PR81	56.17	2.53	5.48	30.0304	5	140.906	86.4134	0.61327	1121.75			1.26862	1	5	140.906					No Rejection
	Owen et al. (2005)	Owen2005-N	Owen2005-057	PR82	186.94	9.38	19.18	367.872	5	140.906	86.4134	0.61327	24.0853			0.601185	1	5	140.906					No Rejection
Tangra Yum Co (Inner Tibet)	Rades et al. (2015)	Rade2015-C	Rade2015-009	12TYB8	18.48	0.57	1.68	2.8224	3	15.5667	6.83287	0.438942	26.1235	986.121	493.061	0.485646	1	2	19.47	1.40007	0.0719092	2.87741	0.147787	3.01662	5.40944	5.40944
	Rades et al. (2015)	Rade2015-C	Rade2015-010	12TYB9	7.76	0.26	0.71	0.5041	3	15.5667	6.83287	0.438942	901.539			8.22327	0	2	19.47					0
	Rades et al. (2015)	Rade2015-C	Rade2015-011	12TYB10	20.46	0.64	1.87	3.4969	3	15.5667	6.83287	0.438942	58.4588			0.964881	1	2	19.47					2.39282
Otgontenger, Bogd (Hangai)	Batbaatar et al. (2018)	Roth2014b-A	Batb2018-041	OT-AG-1	22.26	1.22	2.27	5.1529	6	21.7733	6.17215	0.283473	0.159127	545.809	109.162	0.0833974	1	5	19.55	3.24735	0.166105	5.49679	0.281166	4.93422	142.411	35.6027
	Batbaatar et al. (2018)	Roth2014b-A	Batb2018-042	OT-AG-2	19.84	1.34	2.16	4.6656	6	21.7733	6.17215	0.283473	2.08163			0.333844	1	5	19.55					0.0468367
	Batbaatar et al. (2018)	Roth2014b-A	Batb2018-043	OT-AG-3	23.15	1.29	2.37	5.6169	6	21.7733	6.17215	0.283473	1.13888			0.23669	1	5	19.55					7.78799
	Rother et al. (2014)	Roth2014b-A	Roth2014b-001	MON-D-II-I	16.33	0.41	1.46	2.1316	6	21.7733	6.17215	0.283473	176.263			1.04732	1	5	19.55					61.68
	Rother et al. (2014)	Roth2014b-A	Roth2014b-002	MON-D-II-II	16.17	0.41	1.45	2.1025	6	21.7733	6.17215	0.283473	186.778			1.08553	1	5	19.55					67.9619
	Rother et al. (2014)	Roth2014b-A	Roth2014b-003	MON-D-II-III	32.89	0.83	2.95	8.7025	6	21.7733	6.17215	0.283473	179.388			3.98002	0	5	19.55					0
	Rother et al. (2014)	Roth2014b-B	Roth2014b-004	MON-D-IV-I	21.22	0.53	1.9	3.61	3	18.1033	3.25819	0.179978	34.5803	94.0157	47.0079	1.77433	1	2	19.795	2.01525	0.101806	3.22393	0.162866	7.229	16.0425	16.0425
	Rother et al. (2014)	Roth2014b-B	Roth2014b-005	MON-D-IV-II	18.37	0.48	1.65	2.7225	3	18.1033	3.25819	0.179978	0.308642			0.0865578	1	2	19.795					8.81348
	Rother et al. (2014)	Roth2014b-B	Roth2014b-006	MON-D-IV-III	14.72	0.44	1.34	1.7956	3	18.1033	3.25819	0.179978	59.1268			2.46033	0	2	19.795					0
	Rother et al. (2014)	Roth2014b-C	Roth2014b-007	MON-F-I-I	26.24	0.71	2.36	5.5696	3	25.7033	2.52809	0.0983565	0.571337	31.5696	15.7848	0.224526	1	2	27.08	1.18794	0.0438678	3.6443	0.134575	1.39972	2.7238	2.7238
	Rother et al. (2014)	Roth2014b-C	Roth2014b-008	MON-F-I-II	27.92	0.73	2.51	6.3001	3	25.7033	2.52809	0.0983565	9.22051			1.3637	1	2	27.08					1.32408
	Rother et al. (2014)	Roth2014b-C	Roth2014b-009	MON-F-I-IV	22.95	0.59	2.06	4.2436	3	25.7033	2.52809	0.0983565	21.7778			3.11372	0	2	27.08					0
	Rother et al. (2014)	Roth2014b-E	Roth2014b-013	MON-D-I-I	44.27	1.08	3.97	15.7609	3	35.7933	12.0732	0.337304	61.6031	768.807	384.404	0.935051	1	2	42.705	2.21324	0.0518263	5.85452	0.137092	2.09982	4.40845	4.40845
	Rother et al. (2014)	Roth2014b-E	Roth2014b-014	MON-D-I-II	21.97	0.53	1.96	3.8416	3	35.7933	12.0732	0.337304	680.258			9.11101	0	2	42.705					0
	Rother et al. (2014)	Roth2014b-E	Roth2014b-015	MON-D-I-III	41.14	1.03	3.69	13.6161	3	35.7933	12.0732	0.337304	26.9458			0.507528	1	2	42.705					2.30863
	Rother et al. (2014)	Roth2014b-F	Roth2014b-016	MON-E-I-I	42.03	1.06	3.78	14.2884	3	43.85	13.5917	0.309959	2.94802	165.785	82.8927	0.142773	1	2	36.645	7.61554	0.207819	9.05645	0.24714	25.8083	37.2787	37.2787
	Rother et al. (2014)	Roth2014b-F	Roth2014b-017	MON-E-I-II	58.26	1.44	5.25	27.5625	3	43.85	13.5917	0.309959	100.139			2.78886	0	2	36.645					0
	Rother et al. (2014)	Roth2014b-F	Roth2014b-018	MON-E-I-III	31.26	1.59	3.12	9.7344	3	43.85	13.5917	0.309959	62.6985			1.62999	1	2	36.645					11.4704
	Rother et al. (2014)	Roth2014b-G	Roth2014b-019	MON-E-II-I	62.21	1.79	5.68	32.2624	3	41.5333	19.6307	0.47265	133.43	1046.91	523.453	2.69291	0	2	31.195	11.3773	0.364717	12.0926	0.387646	0	238.659	238.659
	Rother et al. (2014)	Roth2014b-G	Roth2014b-020	MON-E-II-II	23.15	0.61	2.08	4.3264	3	41.5333	19.6307	0.47265	908.215			1.69654	1	2	31.195					173.937
	Rother et al. (2014)	Roth2014b-G	Roth2014b-021	MON-E-II-III	39.24	1	3.53	12.4609	3	41.5333	19.6307	0.47265	5.25938			0.124468	1	2	31.195					64.722
Tanggula Shan (Inner Tibet)	Colgan et al. (2006)	Schä2002-E	Colg2006-001	TS-02-05	53.56	1.49	4.87	23.7169	7	75.2229	14.9405	0.198616	211.378	291.568	48.5946	1.99441	1	7	75.2229	14.9405	0.198616	24.8518	0.330376	No Rejection	291.568	48.5946
	Owen et al. (2005)	Schä2002-E	Owen2005-048	PR71	57.47	2.45	5.55	30.8025	7	75.2229	14.9405	0.198616	52.5054			1.46335	1	7	75.2229					No Rejection
	Owen et al. (2005)	Schä2002-E	Owen2005-049	PR72	78.78	2.62	7.34	53.8756	7	75.2229	14.9405	0.198616	1.84332			0.251736	1	7	75.2229					No Rejection
	Owen et al. (2005)	Schä2002-E	Owen2005-050	PR73	80.3	2.04	7.29	53.1441	7	75.2229	14.9405	0.198616	6.1941			0.363178	1	7	75.2229					No Rejection
	Owen et al. (2005)	Schä2002-E	Owen2005-051	PR74	74.08	3.46	7.31	53.4361	7	75.2229	14.9405	0.198616	0.109102			0.0797492	1	7	75.2229					No Rejection
	Owen et al. (2005)	Schä2002-E	Owen2005-052	PR75	92.85	5.2	9.64	92.9296	7	75.2229	14.9405	0.198616	11.491			1.37899	1	7	75.2229					No Rejection
	Schäfer et al. (2002)	Schä2002-E	Schä2002-011	TAN7	89.52	5.04	9.3	86.49	7	75.2229	14.9405	0.198616	8.04706			1.06441	1	7	75.2229					No Rejection
Hoh lake (Hangai)	Smith et al. (2016)	Smit2016-B	Smit2016-003	MN0711-15A	38.12	1.05	3.45	11.9025	3	34.0867	17.2572	0.506274	14.7554	2164.87	1082.44	0.252892	1	2	43.545	7.67211	0.176188	9.51196	0.21844	26.6944	42.8429	42.8429
	Smith et al. (2016)	Smit2016-B	Smit2016-004	MN0711-15B	48.97	1.35	4.44	19.7136	3	34.0867	17.2572	0.506274	121.544			1.37096	1	2	43.545					16.1485
	Smith et al. (2016)	Smit2016-B	Smit2016-005	MN0711-15C	15.17	0.42	1.37	1.8769	3	34.0867	17.2572	0.506274	2028.57			3.69293	0	2	43.545					0
Bumbat (Hangai)	Smith et al. (2016)	Smit2016-C	Smit2016-006	MN08-11-32A	26.26	0.9	2.43	5.9049	3	23.9333	2.24063	0.0936197	6.68318	13.5678	6.78388	2.11193	0	2	22.77	1.38593	0.0608665	3.29826	0.144851	0	2.92894	2.92894
	Smith et al. (2016)	Smit2016-C	Smit2016-007	MN08-11-32B	21.79	0.82	2.04	4.1616	3	23.9333	2.24063	0.0936197	6.83206			1.64441	1	2	22.77					1.42832
	Smith et al. (2016)	Smit2016-C	Smit2016-008	MN08-11-32C	23.75	0.8	2.19	4.7961	3	23.9333	2.24063	0.0936197	0.0525174			0.0843445	1	2	22.77					1.50063
Menyuan (E Tibet)	Wang et al. (2013)	Wang2013-A	Wang2013-001	DLJ-01	25.53	0.76	2.32	5.3824	3	28.0833	2.95487	0.105218	11.2872	21.1856	10.5928	1.33256	1	2	26.465	1.32229	0.0499637	3.64434	0.137704	1.51355	2.91432	2.91432
	Wang et al. (2013)	Wang2013-A	Wang2013-002	DLJ-02	27.4	0.79	2.48	6.1504	3	28.0833	2.95487	0.105218	0.748189			0.245823	1	2	26.465					1.40078
	Wang et al. (2013)	Wang2013-A	Wang2013-003	DLJ-03	31.32	1.07	2.9	8.41	3	28.0833	2.95487	0.105218	9.15015			2.85423	0	2	26.465					0
	Wang et al. (2013)	Wang2013-B	Wang2013-004	DLJ-04	105.24	4.71	10.36	107.33	8	57.8712	20.3332	0.351353	101.144	413.445	59.0636	6.16369	0	7	51.1043	7.4133	0.145062	14.5189	0.284104	0	140.62	23.4366
	Wang et al. (2013)	Wang2013-B	Wang2013-005	DLJ-05	44.78	2.34	4.52	20.4304	8	57.8712	20.3332	0.351353	31.299			0.701265	1	7	51.1043					7.30451
	Wang et al. (2013)	Wang2013-B	Wang2013-006	DLJ-08	50	1.23	4.49	20.1601	8	57.8712	20.3332	0.351353	40.9522			0.414036	1	7	51.1043					0.806033
	Wang et al. (2013)	Wang2013-B	Wang2013-007	DLJ-10	44.87	1.23	4.07	16.5649	8	57.8712	20.3332	0.351353	111.727			0.699149	1	7	51.1043					25.6899
	Wang et al. (2013)	Wang2013-B	Wang2013-008	DLJ-11	65.49	1.57	5.9	34.81	8	57.8712	20.3332	0.351353	23.5488			0.400035	1	7	51.1043					83.9583
	Wang et al. (2013)	Wang2013-B	Wang2013-009	DLJ-12	55.4	1.39	4.99	24.9001	8	57.8712	20.3332	0.351353	3.16085			0.128494	1	7	51.1043					9.55083
	Wang et al. (2013)	Wang2013-B	Wang2013-010	DLJ-16	51.01	1.33	4.61	21.2521	8	57.8712	20.3332	0.351353	26.6136			0.359733	1	7	51.1043					0.00502561
	Wang et al. (2013)	Wang2013-B	Wang2013-011	DLJ-18	46.18	1.35	4.21	17.7241	8	57.8712	20.3332	0.351353	74.9988			0.624247	1	7	51.1043					13.3051
	Wang et al. (2013)	Wang2013-C	Wang2013-012	DLJ-07	30.29	1.26	2.9	8.41	5	25.954	2.8926	0.111451	11.8423	46.0899	11.5225	2.446	0	4	24.87	1.82276	0.0732917	4.86752	0.195719	0	22.5611	7.52036
	Wang et al. (2013)	Wang2013-C	Wang2013-013	DLJ-13	22.83	0.62	2.06	4.2436	5	25.954	2.8926	0.111451	25.3886			1.42837	1	4	24.87					10.8262
	Wang et al. (2013)	Wang2013-C	Wang2013-014	DLJ-14	26.87	0.68	2.41	5.8081	5	25.954	2.8926	0.111451	1.81457			0.341086	1	4	24.87					8.65052
	Wang et al. (2013)	Wang2013-C	Wang2013-015	DLJ-15	25.84	0.77	2.35	5.5225	5	25.954	2.8926	0.111451	0.0219194			0.0415827	1	4	24.87					1.58695
	Wang et al. (2013)	Wang2013-C	Wang2013-016	DLJ-19	23.94	0.76	2.19	4.7961	5	25.954	2.8926	0.111451	7.0225			0.79437	1	4	24.87					1.4974
	Wang et al. (2013)	Wang2013-D	Wang2013-017	DLJ-06	21.15	1.13	2.14	4.5796	4	19.68	0.995892	0.0506042	1.6923	5.30635	1.76878	1.70338	1	4	19.68	0.995892	0.0506042	3.80105	0.193143	No Rejection	5.30635	1.76878
	Wang et al. (2013)	Wang2013-D	Wang2013-018	DLJ-20	19.3	0.51	1.73	2.9929	4	19.68	0.995892	0.0506042	0.555171			0.394256	1	4	19.68					No Rejection
	Wang et al. (2013)	Wang2013-D	Wang2013-019	DLJ-21	19.33	0.51	1.74	3.0276	4	19.68	0.995892	0.0506042	0.470973			0.361536	1	4	19.68					No Rejection
	Wang et al. (2013)	Wang2013-D	Wang2013-020	DLJ-22	18.94	0.46	1.69	2.8561	4	19.68	0.995892	0.0506042	2.5879			0.85419	1	4	19.68					No Rejection
Borohoro (E Tian Shan)	Zhang et al. (2016)	Zhan2016a-D	Zhan2016a-014	AK-08-7	54.12	2.03	5.11	26.1121	4	63.725	10.6112	0.166516	22.3873	96.7987	32.2662	1.21275	1	3	58.73	4.38145	0.0746033	10.6221	0.180863	5.15715	10.1775	5.08877
	Zhang et al. (2016)	Zhan2016a-D	Zhan2016a-015	AK-08-8	62.84	1.84	5.75	33.0625	4	63.725	10.6112	0.166516	0.23134			0.0900368	1	3	58.73					4.9894
	Zhang et al. (2016)	Zhan2016a-D	Zhan2016a-016	AK-08-9	59.23	2.84	5.87	34.4569	4	63.725	10.6112	0.166516	2.50509			0.468726	1	3	58.73					0.0309958
	Zhang et al. (2016)	Zhan2016a-D	Zhan2016a-017	AK-08-10	78.71	1.77	7.08	50.1264	4	63.725	10.6112	0.166516	71.6749			4.22816	0	3	58.73					0
	Zhang et al. (2016)	Zhan2016a-F	Zhan2016a-020	GNS-08-2	32	0.77	2.86	8.1796	4	21.7	7.69686	0.354694	178.934	476.636	158.879	3.17338	0	3	18.2667	4.25862	0.233136	5.16065	0.282517	0	152.385	76.1925
	Zhang et al. (2016)	Zhan2016a-F	Zhan2016a-021	GNS-08-3	20.65	0.7	1.9	3.61	4	21.7	7.69686	0.354694	2.25			0.14872	1	3	18.2667					11.5924
	Zhang et al. (2016)	Zhan2016a-F	Zhan2016a-022	GNS-08-4	13.35	0.49	1.24	1.5376	4	21.7	7.69686	0.354694	290.389			1.70535	1	3	18.2667					100.681
	Zhang et al. (2016)	Zhan2016a-F	Zhan2016a-023	GNS-08-5	20.8	0.4	1.83	3.3489	4	21.7	7.69686	0.354694	5.0625			0.127571	1	3	18.2667					40.1111

## Sheet: Table S5
TABLE S5. Outlier evaluation using Chauvenet's (Chauvenet, 1891) and Peirce's (Ross, 2003) criteria
Glacier development in continental climate regions of central Asia
Jigjidsurengiin Batbaatar, Alan R. Gillespie, Michele Koppes, Douglas H. Clark, Oliver A. Chadwick, David Fink, Ari Matmon, Summer Rupper
corresponding author email: bataa@uw.edu
												Outlier evaluation by Chauvenet's (1891) criterion									Outlier evaluation by Peirce's criterion (Ross, 2003)
																	Age after Chauvenet's criterion					Step 1. Assume 1 doubtful obs.			Step 2. Assume 2 doubtful obs.			Step 3. Assume 3 doubtful obs.			Age after Peirce's criterion
Site (Subregion)	Publication	Group-ID	Expage sample ID (http://expage.github.io)	Original Sample ID	Age, Xi (ka)	1σ internal uncertainty in age (ka)	1σ external uncertainty in age (ka)	Number of samples within the group	µ , mean of the group (ka)	1σ st.dev of the group (ka)	1σ st.dev of the group (%)	Norm. Variance z=|Xi - µ|/σ	normdist. (-inf < x) (integral)	normdist. (-x < x) (integral)	normdist. (tail) (integral)	Chauvenet's criterion (Reject if <0.5)	Number of samples after rejection	Mean of the group (ka)	1σ st.dev of the mean (ka)	1σ st.dev of the mean (%)	|Xi - µ|	Peirce R value*	(Xi - µ)max	Reject if: |Xi - µ| > (Xi - µ)max	Peirce R value*	(Xi - µ)max	Reject if: |Xi - µ| > (Xi - µ)max	Peirce R value*	(Xi - µ)max	Reject if: |Xi - µ| > (Xi - µ)max	Number of samples after rejection	Mean of the group (ka)	1σ st.dev of the mean (ka)	1σ st.dev of the mean (%)
Kanas (Altai)	Gribenski et al. (2018)	Grib2018-A	Grib2018-001	KC13-06	18.12	0.42	1.61	3	18.53	0.376431	0.0203147	1.08918	0.138038	0.723925	0.276075	0.828226	3	18.53	0.376431	0.0203147	0.41	1.196	0.450211	Accept							3	18.53	0.376431	0.0203147
	Gribenski et al. (2018)	Grib2018-A	Grib2018-002	KC13-07	18.61	0.47	1.67	3	18.53	0.376431	0.0203147	0.212523	0.58415	0.168301	0.831699	2.4951					0.08	1.196	0.450211	Accept
	Gribenski et al. (2018)	Grib2018-A	Grib2018-003	KC13-08	18.86	0.41	1.67	3	18.53	0.376431	0.0203147	0.876656	0.809663	0.619326	0.380674	1.14202					0.33	1.196	0.450211	Accept
	Gribenski et al. (2018)	Grib2018-B	Grib2018-004	KC13-09	11.39	0.29	1.02	3	17.82	5.56865	0.312495	1.15468	0.124111	0.751778	0.248222	0.744667	3	17.82	5.56865	0.312495	6.43	1.196	6.66011	Accept							3	17.82	5.56865	0.312495
	Gribenski et al. (2018)	Grib2018-B	Grib2018-005	KC13-10	21	0.46	1.86	3	17.82	5.56865	0.312495	0.571054	0.716018	0.432037	0.567963	1.70389					3.18	1.196	6.66011	Accept
	Gribenski et al. (2018)	Grib2018-B	Grib2018-006	KC13-13	21.07	0.41	1.86	3	17.82	5.56865	0.312495	0.583624	0.720263	0.440527	0.559473	1.67842					3.25	1.196	6.66011	Accept
	Gribenski et al. (2018)	Grib2018-C	Grib2018-007	KC13-27	246.82	3.42	22.68	3	105.577	123.018	1.1652	1.14815	0.874547	0.749093	0.250907	0.75272	3	105.577	123.018	1.1652	141.243	1.196	147.13	Accept							3	105.577	123.018	1.1652
	Gribenski et al. (2018)	Grib2018-C	Grib2018-008	KC13-28	48.04	0.86	4.24	3	105.577	123.018	1.1652	0.467709	0.319997	0.360007	0.639993	1.91998					57.5367	1.196	147.13	Accept
	Gribenski et al. (2018)	Grib2018-C	Grib2018-009	KC13-29	21.87	0.43	1.93	3	105.577	123.018	1.1652	0.680441	0.248113	0.503775	0.496225	1.48868					83.7067	1.196	147.13	Accept
	Gribenski et al. (2018)	Grib2018-D	Grib2018-010	KC13-22	69.6	0.81	6.1	3	50.1	28.971	0.578264	0.673087	0.749554	0.499108	0.500892	1.50268	3	50.1	28.971	0.578264	19.5	1.196	34.6493	Accept							3	50.1	28.971	0.578264
	Gribenski et al. (2018)	Grib2018-D	Grib2018-011	KC13-23	16.81	0.55	1.54	3	50.1	28.971	0.578264	1.14908	0.125262	0.749477	0.250523	0.751569					33.29	1.196	34.6493	Accept
	Gribenski et al. (2018)	Grib2018-D	Grib2018-012	KC13-25	63.89	0.88	5.61	3	50.1	28.971	0.578264	0.475993	0.68296	0.365921	0.634079	1.90224					13.79	1.196	34.6493	Accept
Chagan Uzun (Altai)	Reuther (2007)	Reu2007-C	Reu2007-004	AK-03-02	15.34	0.62	1.45	3	15.6333	0.329596	0.0210829	0.889979	0.186739	0.626523	0.373477	1.12043	3	15.6333	0.329596	0.0210829	0.293333	1.196	0.394196	Accept							3	15.6333	0.329596	0.0210829
	Reuther (2007)	Reu2007-C	Reu2007-005	AK-03-03	15.99	0.93	1.66	3	15.6333	0.329596	0.0210829	1.08213	0.860403	0.720807	0.279193	0.837579					0.356667	1.196	0.394196	Accept
	Reuther (2007)	Reu2007-C	Reu2007-006	AK-03-04	15.57	0.86	1.59	3	15.6333	0.329596	0.0210829	0.192155	0.423811	0.152379	0.847621	2.54286					0.0633333	1.196	0.394196	Accept
	Reuther (2007)	Reu2007-E	Reu2007-008	CHU-03-01	19.82	2.99	3.44	3	20.8533	3.71927	0.178354	0.277833	0.39057	0.218859	0.781141	2.34342	3	20.8533	3.71927	0.178354	1.03333	1.196	4.44824	Accept							3	20.8533	3.71927	0.178354
	Reuther (2007)	Reu2007-E	Reu2007-009	CHU-03-03	24.98	3.77	4.34	3	20.8533	3.71927	0.178354	1.10954	0.866401	0.732802	0.267198	0.801594					4.12667	1.196	4.44824	Accept
	Reuther (2007)	Reu2007-E	Reu2007-010	CHU-03-04	17.76	0.8	1.72	3	20.8533	3.71927	0.178354	0.831706	0.202788	0.594425	0.405575	1.21673					3.09333	1.196	4.44824	Accept
	Gribenski et al. (2016)	Grib2016-A	Grib2016-001	AL13C-30	19.35	0.26	1.68	3	20.79	3.01045	0.144803	0.478334	0.316206	0.367588	0.632412	1.89724	3	20.79	3.01045	0.144803	1.44	1.196	3.6005	Accept							3	20.79	3.01045	0.144803
	Gribenski et al. (2016)	Grib2016-A	Grib2016-002	AL13C-31	18.77	0.53	1.7	3	20.79	3.01045	0.144803	0.670996	0.251111	0.497777	0.502223	1.50667					2.02	1.196	3.6005	Accept
	Gribenski et al. (2016)	Grib2016-A	Grib2016-003	AL13C-32	24.25	0.33	2.11	3	20.79	3.01045	0.144803	1.14933	0.87479	0.74958	0.25042	0.751259					3.46	1.196	3.6005	Accept
	Gribenski et al. (2016)	Grib2016-C	Grib2016-006	AL13C-26	17.39	0.23	1.51	4	18.3025	0.827058	0.0451883	1.10331	0.134947	0.730107	0.269893	1.07957	4	18.3025	0.827058	0.0451883	0.9125	1.383	1.14382	Accept							4	18.3025	0.827058	0.0451883
	Gribenski et al. (2016)	Grib2016-C	Grib2016-007	AL13C-27	17.98	0.24	1.56	4	18.3025	0.827058	0.0451883	0.389936	0.348292	0.303416	0.696584	2.78633					0.3225	1.383	1.14382	Accept
	Gribenski et al. (2016)	Grib2016-C	Grib2016-008	AL13C-28	19.34	0.43	1.71	4	18.3025	0.827058	0.0451883	1.25445	0.89516	0.79032	0.20968	0.838719					1.0375	1.383	1.14382	Accept
	Gribenski et al. (2016)	Grib2016-C	Grib2016-009	AL13C-29	18.5	0.35	1.62	4	18.3025	0.827058	0.0451883	0.238798	0.594369	0.188738	0.811262	3.24505					0.1975	1.383	1.14382	Accept
	Gribenski et al. (2016)	Grib2016-D	Grib2016-010	AL14C-01	20.55	0.29	1.79	4	19.35	1.22711	0.0634166	0.977907	0.83594	0.67188	0.32812	1.31248	4	19.35	1.22711	0.0634166	1.2	1.383	1.69709	Accept							4	19.35	1.22711	0.0634166
	Gribenski et al. (2016)	Grib2016-D	Grib2016-011	AL14C-02	20.18	0.3	1.76	4	19.35	1.22711	0.0634166	0.676386	0.750602	0.501204	0.498796	1.99518					0.83	1.383	1.69709	Accept
	Gribenski et al. (2016)	Grib2016-D	Grib2016-012	AL14C-03	17.93	0.3	1.57	4	19.35	1.22711	0.0634166	1.15719	0.123597	0.752805	0.247195	0.988779					1.42	1.383	1.69709	Accept
	Gribenski et al. (2016)	Grib2016-D	Grib2016-013	AL14C-04	18.74	0.3	1.64	4	19.35	1.22711	0.0634166	0.497103	0.309558	0.380883	0.619117	2.47647					0.61	1.383	1.69709	Accept
	Gribenski et al. (2016)	Grib2016-E	Grib2016-014	AL13C-35	19.13	0.33	1.67	5	21.994	7.37964	0.33553	0.388095	0.348973	0.302054	0.697946	3.48973	4	18.77	1.82145	0.0970403	2.864	1.509	11.1359	Accept	1.2	8.85557	Accept				4	18.77	1.82145	0.0970403
	Gribenski et al. (2016)	Grib2016-E	Grib2016-015	AL13C-36	21.2	0.42	1.87	5	21.994	7.37964	0.33553	0.107593	0.457159	0.0856817	0.914318	4.57159					0.794	1.509	11.1359	Accept	1.2	8.85557	Accept
	Gribenski et al. (2016)	Grib2016-E	Grib2016-016	AL13C-37	34.89	0.42	3.03	5	21.994	7.37964	0.33553	1.74751	0.959726	0.919451	0.0805489	0.402745					12.896	1.509	11.1359	Reject
	Gribenski et al. (2016)	Grib2016-E	Grib2016-017	AL13C-38	17.49	0.39	1.55	5	21.994	7.37964	0.33553	0.610328	0.270822	0.458355	0.541645	2.70822					4.504	1.509	11.1359	Accept	1.2	8.85557	Accept
	Gribenski et al. (2016)	Grib2016-E	Grib2016-018	AL13C-39	17.26	0.55	1.58	5	21.994	7.37964	0.33553	0.641494	0.260601	0.478799	0.521201	2.60601					4.734	1.509	11.1359	Accept	1.2	8.85557	Accept
Diehanjelegou (E Tian Shan)	This study	Diehanjelegou-B		XCS-103	55.69	1.85	5.16	4	37.8725	14.0658	0.371398	1.26673	0.897374	0.794747	0.205253	0.82101	4	37.8725	14.0658	0.371398	17.8175	1.383	19.453	Accept							4	37.8725	14.0658	0.371398
	This study	Diehanjelegou-B		XCS-104	29.98	1.64	3.06	4	37.8725	14.0658	0.371398	0.561114	0.28736	0.42528	0.57472	2.29888					7.8925	1.383	19.453	Accept
	This study	Diehanjelegou-B		XCS-105	41.98	2.09	4.18	4	37.8725	14.0658	0.371398	0.292021	0.614865	0.229729	0.770271	3.08108					4.1075	1.383	19.453	Accept
	This study	Diehanjelegou-B		XCS-106	23.84	0.76	2.18	4	37.8725	14.0658	0.371398	0.997635	0.159228	0.681544	0.318456	1.27383					14.0325	1.383	19.453	Accept
Alashanje (E Tian Shan)	Li et al. (2014)	Li2014-A	Li2014-001	AR-10-001	201.77	5.18	18.85	5	57.172	81.6555	1.42824	1.77083	0.961705	0.923411	0.0765891	0.382945	4	21.0225	13.3513	0.635097	144.598	1.509	123.218	Reject							4	21.0225	13.3513	0.635097
	Li et al. (2014)	Li2014-A	Li2014-002	AR-10-002	28.77	1.52	2.9	5	57.172	81.6555	1.42824	0.347827	0.363985	0.27203	0.72797	3.63985					28.402	1.509	123.218	Accept	1.2	97.9866	Accept
	Li et al. (2014)	Li2014-A	Li2014-003	AR-10-003	4.15	0.19	0.4	5	57.172	81.6555	1.42824	0.649338	0.25806	0.48388	0.51612	2.5806					53.022	1.509	123.218	Accept	1.2	97.9866	Accept
	Li et al. (2014)	Li2014-A	Li2014-004	AR-10-004	16.97	0.28	1.48	5	57.172	81.6555	1.42824	0.492337	0.311241	0.377519	0.622481	3.11241					40.202	1.509	123.218	Accept	1.2	97.9866	Accept
	Li et al. (2014)	Li2014-A	Li2014-005	AR-10-005	34.2	0.73	3.03	5	57.172	81.6555	1.42824	0.281328	0.389229	0.221541	0.778459	3.89229					22.972	1.509	123.218	Accept	1.2	97.9866	Accept
	Li et al. (2014)	Li2014-B	Li2014-007	AR-10-022	31.36	0.78	2.81	3	22.11	8.82604	0.399187	1.04804	0.852689	0.705378	0.294622	0.883866	3	22.11	8.82604	0.399187	9.25	1.196	10.5559	Accept							3	22.11	8.82604	0.399187
	Li et al. (2014)	Li2014-B	Li2014-008	AR-10-023	21.19	1.03	2.09	3	22.11	8.82604	0.399187	0.104237	0.458491	0.0830188	0.916981	2.75094					0.92	1.196	10.5559	Accept
	Li et al. (2014)	Li2014-B	Li2014-009	AR-10-024	13.78	0.43	1.26	3	22.11	8.82604	0.399187	0.943799	0.172636	0.654727	0.345273	1.03582					8.33	1.196	10.5559	Accept
	Li et al. (2014)	Li2014-D	Li2014-014	AR-10-014	22.74	0.68	2.07	5	29.182	7.83941	0.268639	0.821745	0.205611	0.588778	0.411222	2.05611	4	25.7875	2.26369	0.0877824	6.442	1.509	11.8297	Accept	1.2	9.40729	Accept				4	25.7875	2.26369	0.0877824
	Li et al. (2014)	Li2014-D	Li2014-015	AR-10-015	25.63	0.65	2.3	5	29.182	7.83941	0.268639	0.453095	0.32524	0.34952	0.65048	3.2524					3.552	1.509	11.8297	Accept	1.2	9.40729	Accept
	Li et al. (2014)	Li2014-D	Li2014-016	AR-10-016	28.07	0.71	2.51	5	29.182	7.83941	0.268639	0.141847	0.4436	0.112799	0.887201	4.436					1.112	1.509	11.8297	Accept	1.2	9.40729	Accept
	Li et al. (2014)	Li2014-D	Li2014-017	AR-10-017	26.71	0.62	2.38	5	29.182	7.83941	0.268639	0.31533	0.376256	0.247489	0.752511	3.76256					2.472	1.509	11.8297	Accept	1.2	9.40729	Accept
	Li et al. (2014)	Li2014-D	Li2014-018	AR-10-018	42.76	0.86	3.79	5	29.182	7.83941	0.268639	1.73202	0.958365	0.91673	0.0832704	0.416352					13.578	1.509	11.8297	Reject
	Li et al. (2014)	Li2014-E	Li2014-021	ARL-10-001	54.71	1.15	4.87	7	52.5986	16.2985	0.309866	0.129547	0.551538	0.103075	0.896925	6.27847	6	46.8417	6.35434	0.135656	2.11143	1.693	27.5934	Accept	1.382	22.5246	Accept				6	46.8417	6.35434	0.135656
	Li et al. (2014)	Li2014-E	Li2014-022	ARL-10-002	47.03	1.23	4.24	7	52.5986	16.2985	0.309866	0.341661	0.366303	0.267394	0.732606	5.12824					5.56857	1.693	27.5934	Accept	1.382	22.5246	Accept
	Li et al. (2014)	Li2014-E	Li2014-023	ARL-10-003	49.75	1.11	4.44	7	52.5986	16.2985	0.309866	0.174775	0.430628	0.138743	0.861257	6.0288					2.84857	1.693	27.5934	Accept	1.382	22.5246	Accept
	Li et al. (2014)	Li2014-E	Li2014-024	ARL-10-004	40.83	0.94	3.64	7	52.5986	16.2985	0.309866	0.722064	0.235128	0.529745	0.470255	3.29179					11.7686	1.693	27.5934	Accept	1.382	22.5246	Accept
	Li et al. (2014)	Li2014-E	Li2014-025	ARL-10-005	50.81	1.34	4.59	7	52.5986	16.2985	0.309866	0.109738	0.456308	0.0873831	0.912617	6.38832					1.78857	1.693	27.5934	Accept	1.382	22.5246	Accept
	Li et al. (2014)	Li2014-E	Li2014-026	KXN-10-022	87.14	1.39	7.73	7	52.5986	16.2985	0.309866	2.1193	0.982967	0.965935	0.0340652	0.238457					34.5414	1.693	27.5934	Reject
	Li et al. (2014)	Li2014-E	Li2014-027	KXN-10-024	37.92	2.23	3.96	7	52.5986	16.2985	0.309866	0.900608	0.183898	0.632203	0.367797	2.57458					14.6786	1.693	27.5934	Accept	1.382	22.5246	Accept
	Li et al. (2014)	Li2014-F	Li2014-028	ARL-10-006	72.02	0.92	6.33	3	68.9833	13.0331	0.188931	0.232997	0.592118	0.184236	0.815764	2.44729	3	68.9833	13.0331	0.188931	3.03667	1.196	15.5876	Accept							3	68.9833	13.0331	0.188931
	Li et al. (2014)	Li2014-F	Li2014-029	ARL-10-007	54.7	0.8	4.8	3	68.9833	13.0331	0.188931	1.09593	0.136555	0.72689	0.27311	0.819329					14.2833	1.196	15.5876	Accept
	Li et al. (2014)	Li2014-F	Li2014-030	ARL-10-008	80.23	1.58	7.17	3	68.9833	13.0331	0.188931	0.862932	0.805913	0.611825	0.388175	1.16452					11.2467	1.196	15.5876	Accept
Daxigou (E Tian Shan)	This study	Li2011-D		CS-11b	23.18	0.95	2.21	4	20.2975	2.25294	0.110996	1.27944	0.899628	0.799257	0.200743	0.802973	4	20.2975	2.25294	0.110996	2.8825	1.383	3.11582	Accept							4	20.2975	2.25294	0.110996
	This study	Li2011-D		CS-12a	19.37	1.02	1.95	4	20.2975	2.25294	0.110996	0.411683	0.340286	0.319429	0.680571	2.72229					0.9275	1.383	3.11582	Accept
	Li et al. (2011)	Li2011-D	Li2011-006	07-28	20.76	0.88	1.99	4	20.2975	2.25294	0.110996	0.205287	0.581326	0.162652	0.837348	3.34939					0.4625	1.383	3.11582	Accept
	Li et al. (2011)	Li2011-D	Li2011-007	07-29	17.88	0.73	1.7	4	20.2975	2.25294	0.110996	1.07304	0.141627	0.716747	0.283253	1.13301					2.4175	1.383	3.11582	Accept
	Li et al. (2011)	Li2011-E	Li2011-008	12966	16.88	0.28	1.47	6	17.44	1.39106	0.0797625	0.402572	0.343632	0.312737	0.687263	4.12358	6	17.44	1.39106	0.0797625	0.56	1.61	2.2396	Accept							5	17.212	1.4244	0.0827563
	Li et al. (2011)	Li2011-E	Li2011-009	13332	18.98	0.34	1.66	6	17.44	1.39106	0.0797625	1.10707	0.865869	0.731737	0.268263	1.60958					1.54	1.61	2.2396	Accept
	Li et al. (2011)	Li2011-E	Li2011-010	13697	18.26	0.47	1.64	6	17.44	1.39106	0.0797625	0.58948	0.72223	0.44446	0.55554	3.33324					0.82	1.61	2.2396	Accept
	Li et al. (2011)	Li2011-E	Li2011-011	14062	16.56	0.37	1.47	6	17.44	1.39106	0.0797625	0.632612	0.263493	0.473013	0.526987	3.16192					0.88	1.61	2.2396	Accept
	This study	Li2011-E		CS-10	15.38	0.71	1.5	6	17.44	1.39106	0.0797625	1.48089	0.0693182	0.861364	0.138636	0.831818					2.06	1.61	2.2396	Accept
	This study	Li2011-E		CS-8	18.58	0.87	1.82	6	17.44	1.39106	0.0797625	0.819521	0.793755	0.587511	0.412489	2.47494					1.14	1.61	2.2396	Accept
	Kong et al. (2009)	Kong2009a-A	Kong2009a-001	TB1	11.12	0.71	1.19	5	17.906	4.8978	0.273528	1.38552	0.0829467	0.834107	0.165893	0.829467	5	17.906	4.8978	0.273528	6.786	1.509	7.39078	Accept							5	17.906	4.8978	0.273528
	Kong et al. (2009)	Kong2009a-A	Kong2009a-002	TB2	16.84	0.78	1.64	5	17.906	4.8978	0.273528	0.217649	0.413851	0.172297	0.827703	4.13851					1.066	1.509	7.39078	Accept
	Kong et al. (2009)	Kong2009a-A	Kong2009a-003	TB3	20.77	1.35	2.23	5	17.906	4.8978	0.273528	0.584753	0.720643	0.441286	0.558714	2.79357					2.864	1.509	7.39078	Accept
	Kong et al. (2009)	Kong2009a-A	Kong2009a-004	TB4	24.15	1.33	2.46	5	17.906	4.8978	0.273528	1.27486	0.89882	0.797641	0.202359	1.0118					6.244	1.509	7.39078	Accept
	This study	Kong2009a-A		CS-7b	16.65	0.75	1.61	5	17.906	4.8978	0.273528	0.256442	0.398805	0.20239	0.79761	3.98805					1.256	1.509	7.39078	Accept
	Kong et al. (2009)	Kong2009a-B	Kong2009a-005	TB5	17.67	0.44	1.58	3	16.8967	0.818189	0.0484231	0.945177	0.827716	0.655431	0.344569	1.03371	3	16.8967	0.818189	0.0484231	0.773333	1.196	0.978554	Accept							3	16.8967	0.818189	0.0484231
	Kong et al. (2009)	Kong2009a-B	Kong2009a-006	TB7	16.98	0.81	1.66	3	16.8967	0.818189	0.0484231	0.101851	0.540563	0.081125	0.918875	2.75662					0.0833333	1.196	0.978554	Accept
	Kong et al. (2009)	Kong2009a-B	Kong2009a-007	TB8	16.04	0.94	1.67	3	16.8967	0.818189	0.0484231	1.04703	0.147543	0.704913	0.295087	0.88526					0.856667	1.196	0.978554	Accept
	Kong et al. (2009)	Kong2009a-C	Kong2009a-008	TD2	23.37	1.02	2.25	3	19.59	3.27616	0.167236	1.15379	0.875707	0.751414	0.248586	0.745757	3	19.59	3.27616	0.167236	3.78	1.196	3.91828	Accept							3	19.59	3.27616	0.167236
	Kong et al. (2009)	Kong2009a-C	Kong2009a-009	TD5	17.83	1.07	1.86	3	19.59	3.27616	0.167236	0.537215	0.29556	0.408881	0.591119	1.77336					1.76	1.196	3.91828	Accept
	Kong et al. (2009)	Kong2009a-C	Kong2009a-010	TD6	17.57	0.5	1.59	3	19.59	3.27616	0.167236	0.616576	0.268757	0.462486	0.537514	1.61254					2.02	1.196	3.91828	Accept
	Kong et al. (2009)	Kong2009a-D	Kong2009a-011	TA1	11.62	0.85	1.31	5	11.714	4.75366	0.405811	0.0197742	0.492112	0.0157765	0.984223	4.92112	5	11.714	4.75366	0.405811	0.094	1.509	7.17328	Accept	1.2	5.7044	Accept				3	11.1467	0.60136	0.0539497
	Kong et al. (2009)	Kong2009a-D	Kong2009a-012	TA2	5.96	0.6	0.79	5	11.714	4.75366	0.405811	1.21043	0.113056	0.773888	0.226112	1.13056					5.754	1.509	7.17328	Accept	1.2	5.7044	Reject
	Kong et al. (2009)	Kong2009a-D	Kong2009a-013	TA4	19.17	1.78	2.42	5	11.714	4.75366	0.405811	1.56847	0.941615	0.883229	0.116771	0.583853					7.456	1.509	7.17328	Reject
	Kong et al. (2009)	Kong2009a-D	Kong2009a-014	TA6	10.47	1.08	1.4	5	11.714	4.75366	0.405811	0.261693	0.396779	0.206442	0.793558	3.96779					1.244	1.509	7.17328	Accept	1.2	5.7044	Accept
	Kong et al. (2009)	Kong2009a-D	Kong2009a-015	TA10	11.35	0.84	1.29	5	11.714	4.75366	0.405811	0.0765725	0.469482	0.0610364	0.938964	4.69482					0.364	1.509	7.17328	Accept	1.2	5.7044	Accept
	This study	Li2014-I		CS-5	0.35	0.19	0.2	9	0.464444	0.393513	0.847278	0.290827	0.385592	0.228817	0.771183	6.94065	9	0.464444	0.393513	0.847278	0.114444	1.824	0.717768	Accept	1.515	0.596173	Accept				9	0.33625	0.0891127	0.265019
	This study	Li2014-I		CS-6	1.49	0.22	0.25	9	0.464444	0.393513	0.847278	2.60615	0.995422	0.990843	0.00915659	0.0824093					1.02556	1.824	0.717768	Reject
	Li et al. (2014)	Li2014-I	Li2014-042	1--10-18	0.32	0.03	0.04	9	0.464444	0.393513	0.847278	0.367064	0.356786	0.286428	0.713572	6.42214					0.144444	1.824	0.717768	Accept	1.515	0.596173	Accept
	Li et al. (2014)	Li2014-I	Li2014-043	1--10-19	0.38	0.03	0.05	9	0.464444	0.393513	0.847278	0.214591	0.415043	0.169914	0.830086	7.47078					0.0844444	1.824	0.717768	Accept	1.515	0.596173	Accept
	Li et al. (2014)	Li2014-I	Li2014-044	1--10-20	0.36	0.08	0.09	9	0.464444	0.393513	0.847278	0.265415	0.395345	0.20931	0.79069	7.11621					0.104444	1.824	0.717768	Accept	1.515	0.596173	Accept
	Li et al. (2014)	Li2014-I	Li2014-045	1--10-21	0.35	0.04	0.05	9	0.464444	0.393513	0.847278	0.290827	0.385592	0.228817	0.771183	6.94065					0.114444	1.824	0.717768	Accept	1.515	0.596173	Accept
	Li et al. (2016)	Li2014-I	Li2016-029	WY-12-21	0.25	0.03	0.04	9	0.464444	0.393513	0.847278	0.544948	0.292895	0.414211	0.585789	5.2721					0.214444	1.824	0.717768	Accept	1.515	0.596173	Accept
	Li et al. (2016)	Li2014-I	Li2016-030	WY-12-22	0.49	0.13	0.14	9	0.464444	0.393513	0.847278	0.064942	0.52589	0.0517798	0.94822	8.53398					0.0255556	1.824	0.717768	Accept	1.515	0.596173	Accept
	Li et al. (2016)	Li2014-I	Li2016-031	WY-12-23	0.19	0.02	0.02	9	0.464444	0.393513	0.847278	0.697421	0.24277	0.514461	0.485539	4.36985					0.274444	1.824	0.717768	Accept	1.515	0.596173	Accept
Takelekete (W Tian Shan)	Zhang et al. (2016)	Zhan2016a-B	Zhan2016a-003	BY-08-1	77.41	1.31	6.86	8	55.1387	14.5948	0.264693	1.52597	0.936491	0.872982	0.127018	1.01614	8	55.1387	14.5948	0.264693	22.2713	1.763	25.7307	Accept							8	55.1387	14.5948	0.264693
	Zhang et al. (2016)	Zhan2016a-B	Zhan2016a-004	BY-08-2	35.46	1.25	3.3	8	55.1387	14.5948	0.264693	1.34834	0.0887752	0.82245	0.17755	1.4204					19.6787	1.763	25.7307	Accept
	Zhang et al. (2016)	Zhan2016a-B	Zhan2016a-005	BY-08-3	55.13	1.65	5.05	8	55.1387	14.5948	0.264693	0.000599527	0.499761	0.000478353	0.999522	7.99617					0.00875	1.763	25.7307	Accept
	Zhang et al. (2016)	Zhan2016a-B	Zhan2016a-006	BY-08-6	70.14	1.88	6.38	8	55.1387	14.5948	0.264693	1.02785	0.847989	0.695978	0.304022	2.43218					15.0013	1.763	25.7307	Accept
	Zhang et al. (2016)	Zhan2016a-B	Zhan2016a-007	BY-08-7	43.26	1.67	4.09	8	55.1387	14.5948	0.264693	0.813901	0.207851	0.584298	0.415702	3.32562					11.8787	1.763	25.7307	Accept
	Zhang et al. (2016)	Zhan2016a-B	Zhan2016a-008	BY-08-8	56.95	1.34	5.11	8	55.1387	14.5948	0.264693	0.124102	0.549383	0.0987655	0.901234	7.20988					1.81125	1.763	25.7307	Accept
	Zhang et al. (2016)	Zhan2016a-B	Zhan2016a-009	BY-08-11	61.63	1.77	5.63	8	55.1387	14.5948	0.264693	0.444763	0.671755	0.343509	0.656491	5.25193					6.49125	1.763	25.7307	Accept
	Zhang et al. (2016)	Zhan2016a-B	Zhan2016a-010	BY-08-12	41.13	0.93	3.67	8	55.1387	14.5948	0.264693	0.959842	0.168567	0.662865	0.337135	2.69708					14.0087	1.763	25.7307	Accept
Tailan (W Tian Shan)	Hubert-Ferrari et al. (2005)	Hube2005-A	Hube2005-001	M-1	13.08	0.47	1.21	10	16.93	3.8609	0.228051	0.997176	0.15934	0.681321	0.318679	3.18679	10	16.93	3.8609	0.228051	3.85	1.878	7.25078	Accept							10	16.93	3.8609	0.228051
	Hubert-Ferrari et al. (2005)	Hube2005-A	Hube2005-002	M-2	18.15	0.76	1.73	10	16.93	3.8609	0.228051	0.315988	0.623994	0.247989	0.752011	7.52011					1.22	1.878	7.25078	Accept
	Hubert-Ferrari et al. (2005)	Hube2005-A	Hube2005-003	M-3	16.72	0.48	1.51	10	16.93	3.8609	0.228051	0.0543914	0.478312	0.0433767	0.956623	9.56623					0.21	1.878	7.25078	Accept
	Hubert-Ferrari et al. (2005)	Hube2005-A	Hube2005-004	M-24	18.95	0.49	1.7	10	16.93	3.8609	0.228051	0.523194	0.69958	0.39916	0.60084	6.0084					2.02	1.878	7.25078	Accept
	Hubert-Ferrari et al. (2005)	Hube2005-A	Hube2005-005	M-25	19.45	0.58	1.77	10	16.93	3.8609	0.228051	0.652697	0.743024	0.486048	0.513952	5.13952					2.52	1.878	7.25078	Accept
	Hubert-Ferrari et al. (2005)	Hube2005-A	Hube2005-006	M-26	17.11	0.47	1.54	10	16.93	3.8609	0.228051	0.0466212	0.518592	0.0371849	0.962815	9.62815					0.18	1.878	7.25078	Accept
	Hubert-Ferrari et al. (2005)	Hube2005-A	Hube2005-007	M-27	12.39	0.43	1.14	10	16.93	3.8609	0.228051	1.17589	0.119819	0.760361	0.239639	2.39639					4.54	1.878	7.25078	Accept
	Hubert-Ferrari et al. (2005)	Hube2005-A	Hube2005-008	M-28	22.16	0.59	1.99	10	16.93	3.8609	0.228051	1.35461	0.912228	0.824457	0.175543	1.75543					5.23	1.878	7.25078	Accept
	Hubert-Ferrari et al. (2005)	Hube2005-A	Hube2005-009	M-29	10.35	0.34	0.95	10	16.93	3.8609	0.228051	1.70426	0.0441659	0.911668	0.0883317	0.883317					6.58	1.878	7.25078	Accept
	Hubert-Ferrari et al. (2005)	Hube2005-A	Hube2005-010	M-30	20.94	0.57	1.88	10	16.93	3.8609	0.228051	1.03862	0.850509	0.701017	0.298983	2.98983					4.01	1.878	7.25078	Accept
Inylchek (W Tian Shan)	Lifton et al. (2014)	Lift2014-A	Lift2014-001	INK-01	16.66	0.8	1.64	5	28.788	9.33786	0.324366	1.2988	0.0970066	0.805987	0.194013	0.970066	5	28.788	9.33786	0.324366	12.128	1.509	14.0908	Accept							5	28.788	9.33786	0.324366
	Lifton et al. (2014)	Lift2014-A	Lift2014-002	INK-01B	33.13	0.76	2.95	5	28.788	9.33786	0.324366	0.464989	0.67903	0.35806	0.64194	3.2097					4.342	1.509	14.0908	Accept
	Lifton et al. (2014)	Lift2014-A	Lift2014-003	INK-02	40.01	0.8	3.54	5	28.788	9.33786	0.324366	1.20177	0.885274	0.770549	0.229451	1.14726					11.222	1.509	14.0908	Accept
	Lifton et al. (2014)	Lift2014-A	Lift2014-004	TS12-IN-07	32.12	0.62	2.83	5	28.788	9.33786	0.324366	0.356827	0.639389	0.278779	0.721221	3.60611					3.332	1.509	14.0908	Accept
	Lifton et al. (2014)	Lift2014-A	Lift2014-005	TS12-IN-11	22.02	0.6	1.98	5	28.788	9.33786	0.324366	0.724791	0.23429	0.53142	0.46858	2.3429					6.768	1.509	14.0908	Accept
	Lifton et al. (2014)	Lift2014-E	Lift2014-010	TS12-IN-01	37.94	1.58	3.63	5	43.358	30.1079	0.694402	0.179953	0.428595	0.142811	0.857189	4.28595	5	43.358	30.1079	0.694402	5.418	1.509	45.4328	Accept							5	43.358	30.1079	0.694402
	Lifton et al. (2014)	Lift2014-E	Lift2014-011	TS12-IN-02	80.82	2.49	7.47	5	43.358	30.1079	0.694402	1.24426	0.893298	0.786596	0.213404	1.06702					37.462	1.509	45.4328	Accept
	Lifton et al. (2014)	Lift2014-E	Lift2014-012	TS12-IN-03	67.8	1.04	5.98	5	43.358	30.1079	0.694402	0.811814	0.791551	0.583102	0.416898	2.08449					24.442	1.509	45.4328	Accept
	Lifton et al. (2014)	Lift2014-E	Lift2014-013	TS12-IN-04	15.58	0.67	1.49	5	43.358	30.1079	0.694402	0.922616	0.178104	0.643793	0.356207	1.78104					27.778	1.509	45.4328	Accept
	Lifton et al. (2014)	Lift2014-E	Lift2014-014	TS12-IN-05	14.65	0.51	1.35	5	43.358	30.1079	0.694402	0.953505	0.170167	0.659666	0.340334	1.70167					28.708	1.509	45.4328	Accept
	Lifton et al. (2014)	Lift2014-I	Lift2014-019	SJ-Q1-1	167.78	4.86	15.71	3	104.007	74.9312	0.720446	0.851092	0.802641	0.605282	0.394718	1.18416	3	104.007	74.9312	0.720446	63.7733	1.196	89.6177	Accept							3	104.007	74.9312	0.720446
	Lifton et al. (2014)	Lift2014-I	Lift2014-020	SJ-Q1-4	122.76	12.83	16.77	3	104.007	74.9312	0.720446	0.250274	0.598812	0.197625	0.802375	2.40713					18.7533	1.196	89.6177	Accept
	Lifton et al. (2014)	Lift2014-I	Lift2014-021	SJ-Q1-5	21.48	1.43	2.33	3	104.007	74.9312	0.720446	1.10137	0.135369	0.729262	0.270738	0.812213					82.5267	1.196	89.6177	Accept
Choktal (W Tian Shan)	This study	Choktal river-A		CR-001A	22.07	0.66	2.01	3	22.2033	1.26528	0.056986	0.105379	0.458038	0.0839245	0.916075	2.74823	3	22.2033	1.26528	0.056986	0.133333	1.196	1.51327	Accept							3	22.2033	1.26528	0.056986
	This study	Choktal river-A		CR-001B	23.53	0.78	2.17	3	22.2033	1.26528	0.056986	1.04852	0.8528	0.705599	0.294401	0.883202					1.32667	1.196	1.51327	Accept
	This study	Choktal river-A		CR-001C	21.01	0.62	1.91	3	22.2033	1.26528	0.056986	0.943138	0.172805	0.65439	0.34561	1.03683					1.19333	1.196	1.51327	Accept
	This study	Choktal river-B		CR-003A	15.22	0.49	1.39	3	15.3533	0.359073	0.0233873	0.371327	0.355197	0.289606	0.710394	2.13118	3	15.3533	0.359073	0.0233873	0.133333	1.196	0.429451	Accept							3	15.3533	0.359073	0.0233873
	This study	Choktal river-B		CR-003C	15.08	0.45	1.37	3	15.3533	0.359073	0.0233873	0.76122	0.223263	0.553474	0.446526	1.33958					0.273333	1.196	0.429451	Accept
	This study	Choktal river-B		CR-003D	15.76	0.5	1.44	3	15.3533	0.359073	0.0233873	1.13255	0.871298	0.742595	0.257405	0.772214					0.406667	1.196	0.429451	Accept
	This study	Choktal river-C		CR-002A	0.25	0.06	0.06	3	0.253333	0.0057735	0.0227901	0.57735	0.281851	0.436297	0.563703	1.69111	3	0.253333	0.0057735	0.0227901	0.00333333	1.196	0.00690511	Accept							3	0.253333	0.0057735	0.0227901
	This study	Choktal river-C		CR-002D	0.26	0.08	0.08	3	0.253333	0.0057735	0.0227901	1.1547	0.875893	0.751787	0.248213	0.744639					0.00666667	1.196	0.00690511	Accept
	This study	Choktal river-C		CR-002E	0.25	0.06	0.06	3	0.253333	0.0057735	0.0227901	0.57735	0.281851	0.436297	0.563703	1.69111					0.00333333	1.196	0.00690511	Accept
Barskoon & Suek (W Tian Shan)	Blomdin et al. (2016)	Blom-A	Blom-001	TS-C-12-008	97.63	1.66	8.7	5	82.806	16.3767	0.197772	0.905189	0.817317	0.634635	0.365365	1.82683	5	82.806	16.3767	0.197772	14.824	1.509	24.7124	Accept	1.2	19.652	Accept				4	89.4875	7.74458	0.0865437
	Blomdin et al. (2016)	Blom-A	Blom-002	TS-C-12-010	93.85	1.54	8.35	5	82.806	16.3767	0.197772	0.674373	0.749963	0.499926	0.500074	2.50037					11.044	1.509	24.7124	Accept	1.2	19.652	Accept
	Blomdin et al. (2016)	Blom-A	Blom-003	TS-C-12-009	86.1	1.55	7.67	5	82.806	16.3767	0.197772	0.201139	0.579705	0.15941	0.84059	4.20295					3.294	1.509	24.7124	Accept	1.2	19.652	Accept
	Blomdin et al. (2016)	Blom-A	Blom-004	TS-C-12-007	80.37	1.29	7.12	5	82.806	16.3767	0.197772	0.148748	0.440876	0.118247	0.881753	4.40876					2.436	1.509	24.7124	Accept	1.2	19.652	Accept
	Blomdin et al. (2016)	Blom-A	Blom-005	TS-C-12-011	56.08	0.97	4.65	5	82.806	16.3767	0.197772	1.63195	0.0513447	0.897311	0.102689	0.513447					26.726	1.509	24.7124	Reject
	Blomdin et al. (2016)	Blom-B	Blom-006	TS-C-12-037	44.85	0.67	3.93	3	32.1067	12.2449	0.381382	1.04071	0.850994	0.701988	0.298012	0.894036	3	32.1067	12.2449	0.381382	12.7433	1.196	14.6449	Accept							3	32.1067	12.2449	0.381382
	Blomdin et al. (2016)	Blom-B	Blom-007	TS-C-12-035	31.04	0.64	2.75	3	32.1067	12.2449	0.381382	0.0871111	0.465292	0.0694168	0.930583	2.79175					1.06667	1.196	14.6449	Accept
	Blomdin et al. (2016)	Blom-B	Blom-008	TS-C-12-036	20.43	0.42	1.8	3	32.1067	12.2449	0.381382	0.953595	0.170144	0.659711	0.340289	1.02087					11.6767	1.196	14.6449	Accept
	Blomdin et al. (2016)	Blom-C	Blom-009	TS-C-12-020	26.69	0.82	2.44	4	19.375	5.98795	0.309055	1.22162	0.889074	0.778149	0.221851	0.887404	4	19.375	5.98795	0.309055	7.315	1.383	8.28133	Accept							4	19.375	5.98795	0.309055
	Blomdin et al. (2016)	Blom-C	Blom-010	TS-C-12-019	20.93	0.95	2.03	4	19.375	5.98795	0.309055	0.259688	0.602448	0.204896	0.795104	3.18042					1.555	1.383	8.28133	Accept
	Blomdin et al. (2016)	Blom-C	Blom-011	TS-C-12-022	17.42	0.53	1.59	4	19.375	5.98795	0.309055	0.326489	0.372027	0.255946	0.744054	2.97622					1.955	1.383	8.28133	Accept
	Blomdin et al. (2016)	Blom-C	Blom-012	TS-C-12-021	12.46	0.49	1.18	4	19.375	5.98795	0.309055	1.15482	0.124082	0.751836	0.248164	0.992657					6.915	1.383	8.28133	Accept
	Blomdin et al. (2016)	Blom-D	Blom-013	TS-C-12-026	16.01	0.26	1.4	3	13.81	2.47516	0.179229	0.888833	0.812953	0.625907	0.374093	1.12228	3	13.81	2.47516	0.179229	2.2	1.196	2.96029	Accept							3	13.81	2.47516	0.179229
	Blomdin et al. (2016)	Blom-D	Blom-014	TS-C-12-023	14.29	0.5	1.32	3	13.81	2.47516	0.179229	0.193927	0.576884	0.153767	0.846233	2.5387					0.48	1.196	2.96029	Accept
	Blomdin et al. (2016)	Blom-D	Blom-015	TS-C-12-025	11.13	0.3	1	3	13.81	2.47516	0.179229	1.08276	0.139458	0.721085	0.278915	0.836745					2.68	1.196	2.96029	Accept
	This study	Suek-A		SO-CS-001	19.92	0.7	1.85	3	18.53	4.00995	0.216403	0.346638	0.635568	0.271137	0.728863	2.18659	3	18.53	4.00995	0.216403	1.39	1.196	4.7959	Accept							3	18.53	4.00995	0.216403
	This study	Suek-A		SO-CS-002A	14.01	0.57	1.33	3	18.53	4.00995	0.216403	1.1272	0.12983	0.74034	0.25966	0.778979					4.52	1.196	4.7959	Accept
	This study	Suek-A		SO-CS-002B	21.66	0.86	2.05	3	18.53	4.00995	0.216403	0.780558	0.782469	0.564938	0.435062	1.30519					3.13	1.196	4.7959	Accept
	This study	Barskoon Suu-A		BS-007A	15.73	0.41	1.41	4	15.495	2.55402	0.164829	0.0920117	0.536656	0.0733113	0.926689	3.70675	4	15.495	2.55402	0.164829	0.235	1.383	3.53221	Accept							4	15.495	2.55402	0.164829
	This study	Barskoon Suu-A		BS-007B	15.55	0.39	1.39	4	15.495	2.55402	0.164829	0.0215347	0.50859	0.0171808	0.982819	3.93128					0.055	1.383	3.53221	Accept
	This study	Barskoon Suu-A		BS-007C	18.47	0.78	1.76	4	15.495	2.55402	0.164829	1.16483	0.877956	0.755912	0.244088	0.976353					2.975	1.383	3.53221	Accept
	This study	Barskoon Suu-A		BS-007D	12.23	1.13	1.54	4	15.495	2.55402	0.164829	1.27838	0.100559	0.798883	0.201117	0.804468					3.265	1.383	3.53221	Accept
	This study	Barskoon Suu-C		BS-001A	0.29	0.06	0.07	3	0.366667	0.107858	0.294158	0.710812	0.238601	0.522799	0.477201	1.4316	3	0.366667	0.107858	0.294158	0.0766667	1.196	0.128998	Accept							3	0.366667	0.107858	0.294158
	This study	Barskoon Suu-C		BS-002A	0.49	0.1	0.11	3	0.366667	0.107858	0.294158	1.14348	0.87358	0.74716	0.25284	0.758519					0.123333	1.196	0.128998	Accept
	This study	Barskoon Suu-C		BS-002B	0.32	0.06	0.07	3	0.366667	0.107858	0.294158	0.432668	0.332628	0.334744	0.665256	1.99577					0.0466667	1.196	0.128998	Accept
Gulbel (W Tian Shan)	This study	Gulbel pass-A		GP-001	15.38	1.3	1.85	3	19.6933	3.74029	0.189926	1.15321	0.124412	0.751176	0.248824	0.746473	3	19.6933	3.74029	0.189926	4.31333	1.196	4.47338	Accept							3	19.6933	3.74029	0.189926
	This study	Gulbel pass-A		GP-005	22.04	0.64	2	3	19.6933	3.74029	0.189926	0.627403	0.734802	0.469605	0.530395	1.59119					2.34667	1.196	4.47338	Accept
	This study	Gulbel pass-A		GP-006	21.66	0.66	1.97	3	19.6933	3.74029	0.189926	0.525807	0.700489	0.400977	0.599023	1.79707					1.96667	1.196	4.47338	Accept
	This study	Gulbel pass-C		GP-003A	17.52	0.68	1.65	3	17.3333	0.865236	0.0499175	0.215741	0.585405	0.17081	0.82919	2.48757	3	17.3333	0.865236	0.0499175	0.186667	1.196	1.03482	Accept							3	17.3333	0.865236	0.0499175
	This study	Gulbel pass-C		GP-003B	16.39	0.98	1.71	3	17.3333	0.865236	0.0499175	1.09026	0.137799	0.724402	0.275598	0.826794					0.943333	1.196	1.03482	Accept
	This study	Gulbel pass-C		GP-003C	18.09	0.46	1.62	3	17.3333	0.865236	0.0499175	0.874521	0.809083	0.618165	0.381835	1.1455					0.756667	1.196	1.03482	Accept
	This study	Gulbel pass-D		GP-002A	17.57	0.54	1.6	3	16.7933	0.865698	0.0515501	0.897156	0.815182	0.630365	0.369635	1.10891	3	16.7933	0.865698	0.0515501	0.776667	1.196	1.03538	Accept							3	16.7933	0.865698	0.0515501
	This study	Gulbel pass-D		GP-002C	15.86	0.72	1.54	3	16.7933	0.865698	0.0515501	1.07813	0.140488	0.719023	0.280977	0.84293					0.933333	1.196	1.03538	Accept
	This study	Gulbel pass-D		GP-002D	16.95	0.51	1.54	3	16.7933	0.865698	0.0515501	0.180971	0.571805	0.14361	0.85639	2.56917					0.156667	1.196	1.03538	Accept
At Bashi (W Tian Shan)	Zech (2012)	Zec2012-A	Zec2012-001	KI11	10.2	0.42	0.97	4	14.83	3.19233	0.215262	1.45035	0.0734806	0.853039	0.146961	0.587845	4	14.83	3.19233	0.215262	4.63	1.383	4.415	Reject							3	16.3733	0.997614	0.0609292
	Zech (2012)	Zec2012-A	Zec2012-002	KI12	16.29	0.59	1.52	4	14.83	3.19233	0.215262	0.457346	0.676289	0.352577	0.647423	2.58969					1.46	1.383	4.415	Accept	1.078	3.44134	Accept
	Zech (2012)	Zec2012-A	Zec2012-003	KI13	17.41	0.54	1.59	4	14.83	3.19233	0.215262	0.808186	0.790508	0.581016	0.418984	1.67593					2.58	1.383	4.415	Accept	1.078	3.44134	Accept
	Zech (2012)	Zec2012-A	Zec2012-004	KI14	15.42	0.74	1.51	4	14.83	3.19233	0.215262	0.184818	0.573314	0.146628	0.853372	3.41349					0.59	1.383	4.415	Accept	1.078	3.44134	Accept
	Zech (2012)	Zec2012-B	Zec2012-005	KI21	21.08	0.74	1.96	5	20.114	2.72208	0.135333	0.354875	0.638659	0.277317	0.722683	3.61341	5	20.114	2.72208	0.135333	0.966	1.509	4.10762	Accept							5	20.114	2.72208	0.135333
	Zech (2012)	Zec2012-B	Zec2012-006	KI22	24.18	0.82	2.23	5	20.114	2.72208	0.135333	1.49371	0.932374	0.864748	0.135252	0.676258					4.066	1.509	4.10762	Accept
	Zech (2012)	Zec2012-B	Zec2012-007	KI23	17.75	0.57	1.63	5	20.114	2.72208	0.135333	0.868453	0.192573	0.614854	0.385146	1.92573					2.364	1.509	4.10762	Accept
	Zech (2012)	Zec2012-B	Zec2012-008	KI24	17.55	0.58	1.61	5	20.114	2.72208	0.135333	0.941926	0.173115	0.65377	0.34623	1.73115					2.564	1.509	4.10762	Accept
	Zech (2012)	Zec2012-B	Zec2012-009	KI25	20.01	0.68	1.85	5	20.114	2.72208	0.135333	0.0382061	0.484762	0.0304766	0.969523	4.84762					0.104	1.509	4.10762	Accept
	Zech (2012)	Zec2012-C	Zec2012-010	KI31	62.94	1.93	5.79	3	49.3233	26.8439	0.544243	0.507254	0.694012	0.388024	0.611976	1.83593	3	49.3233	26.8439	0.544243	13.6167	1.196	32.1053	Accept							3	49.3233	26.8439	0.544243
	Zech (2012)	Zec2012-C	Zec2012-011	KI32	66.63	2.65	6.36	3	49.3233	26.8439	0.544243	0.644716	0.740444	0.480889	0.519111	1.55733					17.3067	1.196	32.1053	Accept
	Zech (2012)	Zec2012-C	Zec2012-012	KI33	18.4	0.73	1.74	3	49.3233	26.8439	0.544243	1.15197	0.124667	0.750667	0.249333	0.748					30.9233	1.196	32.1053	Accept
Dumda (Qilian Shan)	This study	Dumda-A		CH-DU-01	125.39	2.82	11.4	3	140.547	16.7997	0.119531	0.902201	0.183475	0.63305	0.36695	1.10085	3	140.547	16.7997	0.119531	15.1567	1.196	20.0924	Accept							3	140.547	16.7997	0.119531
	This study	Dumda-A		CH-DU-02	158.61	4.14	14.69	3	140.547	16.7997	0.119531	1.07522	0.858862	0.717724	0.282276	0.846829					18.0633	1.196	20.0924	Accept
	This study	Dumda-A		CH-DU-03	137.64	3.99	12.8	3	140.547	16.7997	0.119531	0.173019	0.431318	0.137364	0.862636	2.58791					2.90667	1.196	20.0924	Accept
Gangshiqia (Qilian Shan)	Owen et al. (2003b)	Owen2003d-C	Owen2003d-005	Q9	11.87	0.45	1.11	3	13.1233	1.24022	0.0945046	1.01058	0.156109	0.687781	0.312219	0.936656	3	13.1233	1.24022	0.0945046	1.25333	1.196	1.4833	Accept							3	13.1233	1.24022	0.0945046
	Owen et al. (2003b)	Owen2003d-C	Owen2003d-006	Q10	14.35	0.45	1.31	3	13.1233	1.24022	0.0945046	0.989076	0.838687	0.677374	0.322626	0.967878					1.22667	1.196	1.4833	Accept
	Owen et al. (2003b)	Owen2003d-C	Owen2003d-007	Q11	13.15	0.45	1.21	3	13.1233	1.24022	0.0945046	0.0215016	0.508577	0.0171545	0.982845	2.94854					0.0266667	1.196	1.4833	Accept
	Owen et al. (2003b)	Owen2003d-D	Owen2003d-008	Q12	11.49	0.68	1.19	3	17.1033	6.12132	0.357902	0.917014	0.179568	0.640865	0.359135	1.07741	3	17.1033	6.12132	0.357902	5.61333	1.196	7.3211	Accept							3	17.1033	6.12132	0.357902
	Owen et al. (2003b)	Owen2003d-D	Owen2003d-009	Q13	23.63	0.69	2.14	3	17.1033	6.12132	0.357902	1.06622	0.856838	0.713675	0.286325	0.858974					6.52667	1.196	7.3211	Accept
	Owen et al. (2003b)	Owen2003d-D	Owen2003d-010	Q14	16.19	0.9	1.66	3	17.1033	6.12132	0.357902	0.149205	0.440696	0.118608	0.881392	2.64417					0.913333	1.196	7.3211	Accept
	This study	Qilian Shan-D		QS-GG-001	11.31	0.42	1.06	7	10.4857	4.95299	0.472356	0.166422	0.566088	0.132175	0.867825	6.07477	7	10.4857	4.95299	0.472356	0.824286	1.693	8.38541	Accept							7	10.4857	4.95299	0.472356
	This study	Qilian Shan-D		QS-GG-002	13.52	0.42	1.23	7	10.4857	4.95299	0.472356	0.612617	0.729935	0.45987	0.54013	3.78091					3.03429	1.693	8.38541	Accept
	This study	Qilian Shan-D		QS-GG-003	14.54	0.48	1.33	7	10.4857	4.95299	0.472356	0.818553	0.793479	0.586959	0.413041	2.89129					4.05429	1.693	8.38541	Accept
	This study	Qilian Shan-D		QS-GG-004	14.89	0.42	1.34	7	10.4857	4.95299	0.472356	0.889218	0.813057	0.626114	0.373886	2.6172					4.40429	1.693	8.38541	Accept
	This study	Qilian Shan-D		QS-GG-005	3.84	0.24	0.41	7	10.4857	4.95299	0.472356	1.34176	0.0898372	0.820326	0.179674	1.25772					6.64571	1.693	8.38541	Accept
	This study	Qilian Shan-D		QS-GG-006	3.11	0.18	0.32	7	10.4857	4.95299	0.472356	1.48914	0.0682247	0.863551	0.136449	0.955146					7.37571	1.693	8.38541	Accept
	This study	Qilian Shan-D		QS-GG-007	12.19	0.43	1.13	7	10.4857	4.95299	0.472356	0.344092	0.634612	0.269223	0.730777	5.11544					1.70429	1.693	8.38541	Accept
Laolongwan (Qilian Shan)	Owen et al. (2003b)	Owen2003d-A	Owen2003d-001	Q1	17.66	0.49	1.59	3	13.2233	3.85072	0.291206	1.15217	0.875374	0.750747	0.249253	0.747759	3	13.2233	3.85072	0.291206	4.43667	1.196	4.60546	Accept							3	13.2233	3.85072	0.291206
	Owen et al. (2003b)	Owen2003d-A	Owen2003d-002	Q2	10.75	0.24	0.95	3	13.2233	3.85072	0.291206	0.642304	0.260338	0.479324	0.520676	1.56203					2.47333	1.196	4.60546	Accept
	Owen et al. (2003b)	Owen2003d-A	Owen2003d-003	Q3	11.26	0.24	0.99	3	13.2233	3.85072	0.291206	0.509862	0.305074	0.389852	0.610148	1.83045					1.96333	1.196	4.60546	Accept
	Owen et al. (2003b)	Owen2003d-E	Owen2003d-011	Q15	20.06	0.45	1.78	3	19.45	0.528299	0.0271619	1.15465	0.875883	0.751766	0.248234	0.744703	3	19.45	0.528299	0.0271619	0.61	1.196	0.631846	Accept							3	19.45	0.528299	0.0271619
	Owen et al. (2003b)	Owen2003d-E	Owen2003d-012	Q16	19.15	0.91	1.88	3	19.45	0.528299	0.0271619	0.56786	0.285065	0.42987	0.57013	1.71039					0.3	1.196	0.631846	Accept
	Owen et al. (2003b)	Owen2003d-E	Owen2003d-013	Q17	19.14	0.46	1.71	3	19.45	0.528299	0.0271619	0.586789	0.278673	0.442654	0.557346	1.67204					0.31	1.196	0.631846	Accept
Haiyuan (Qilian Shan)	Lasserre et al. (2002)	Lass2002-A	Lass2002-001	LLL1	5.92	0.41	0.65	12	9.4725	4.21523	0.444997	0.842776	0.199677	0.600646	0.399354	4.79224	12	9.4725	4.21523	0.444997	3.5525	1.969	8.2998	Accept							12	9.4725	4.21523	0.444997
	Lasserre et al. (2002)	Lass2002-A	Lass2002-002	LLL2	8.2	0.41	0.81	12	9.4725	4.21523	0.444997	0.301881	0.381371	0.237257	0.762743	9.15291					1.2725	1.969	8.2998	Accept
	Lasserre et al. (2002)	Lass2002-A	Lass2002-003	LLL3	12.78	0.65	1.27	12	9.4725	4.21523	0.444997	0.784654	0.783672	0.567343	0.432657	5.19188					3.3075	1.969	8.2998	Accept
	Lasserre et al. (2002)	Lass2002-A	Lass2002-004	LLL4	7.85	0.39	0.78	12	9.4725	4.21523	0.444997	0.384913	0.350151	0.299698	0.700302	8.40362					1.6225	1.969	8.2998	Accept
	Lasserre et al. (2002)	Lass2002-A	Lass2002-005	LLL5	14.31	0.79	1.46	12	9.4725	4.21523	0.444997	1.14762	0.874438	0.748876	0.251124	3.01349					4.8375	1.969	8.2998	Accept
	Lasserre et al. (2002)	Lass2002-A	Lass2002-006	LLL6	3.14	0.17	0.32	12	9.4725	4.21523	0.444997	1.50229	0.0665113	0.866977	0.133023	1.59627					6.3325	1.969	8.2998	Accept
	Lasserre et al. (2002)	Lass2002-A	Lass2002-007	LLL7	4.7	0.35	0.53	12	9.4725	4.21523	0.444997	1.1322	0.128775	0.742451	0.257549	3.09059					4.7725	1.969	8.2998	Accept
	Lasserre et al. (2002)	Lass2002-A	Lass2002-008	LLL8	11.37	0.66	1.18	12	9.4725	4.21523	0.444997	0.450153	0.6737	0.3474	0.6526	7.8312					1.8975	1.969	8.2998	Accept
	Lasserre et al. (2002)	Lass2002-A	Lass2002-009	LLL9	12.98	0.73	1.33	12	9.4725	4.21523	0.444997	0.832101	0.797324	0.594648	0.405352	4.86422					3.5075	1.969	8.2998	Accept
	Lasserre et al. (2002)	Lass2002-A	Lass2002-010	LLL10	14.33	0.72	1.42	12	9.4725	4.21523	0.444997	1.15237	0.875415	0.75083	0.24917	2.99004					4.8575	1.969	8.2998	Accept
	Lasserre et al. (2002)	Lass2002-A	Lass2002-010	LLL10b	13.6	0.7	1.36	12	9.4725	4.21523	0.444997	0.979186	0.836256	0.672512	0.327488	3.92986					4.1275	1.969	8.2998	Accept
	Lasserre et al. (2002)	Lass2002-A	Lass2002-011	LLL11	4.49	0.27	0.47	12	9.4725	4.21523	0.444997	1.18202	0.118598	0.762803	0.237197	2.84636					4.9825	1.969	8.2998	Accept
La Ji (Qilian Shan)	Owen et al. (2003a)	Owen2003c-C	Owen2003c-007	LJ7	23.57	0.7	2.14	4	38.0975	25.606	0.672117	0.567348	0.285239	0.429522	0.570478	2.28191	4	38.0975	25.606	0.672117	14.5275	1.383	35.4131	Accept	1.078	27.6032	Accept				3	25.3533	3.00264	0.118432
	Owen et al. (2003a)	Owen2003c-C	Owen2003c-008	LJ8	28.82	0.68	2.57	4	38.0975	25.606	0.672117	0.362318	0.358557	0.282885	0.717115	2.86846					9.2775	1.383	35.4131	Accept	1.078	27.6032	Accept
	Owen et al. (2003a)	Owen2003c-C	Owen2003c-009	LJ9	76.33	1.75	6.87	4	38.0975	25.606	0.672117	1.49311	0.932296	0.864591	0.135409	0.541635					38.2325	1.383	35.4131	Reject
	Owen et al. (2003a)	Owen2003c-C	Owen2003c-010	LJ10	23.67	0.34	2.06	4	38.0975	25.606	0.672117	0.563443	0.286567	0.426867	0.573133	2.29253					14.4275	1.383	35.4131	Accept	1.078	27.6032	Accept
Mawang Kangri (Inner Tibet)	Amidon et al. (2013)	Amid2013-A	Amid2013-001	1	26.15	0.36	2.28	7	61.9343	20.7377	0.334834	1.72557	0.0422127	0.915575	0.0844254	0.590978	7	61.9343	20.7377	0.334834	35.7843	1.693	35.1089	Reject							5	62.684	8.2265	0.131238
	Amidon et al. (2013)	Amid2013-A	Amid2013-002	3	70.6	1.35	6.28	7	61.9343	20.7377	0.334834	0.417872	0.66198	0.32396	0.67604	4.73228					8.66571	1.693	35.1089	Accept	1.382	28.6595	Accept	1.187	24.6157	Accept
	Amidon et al. (2013)	Amid2013-A	Amid2013-003	4	59.86	0.87	5.26	7	61.9343	20.7377	0.334834	0.100025	0.460162	0.0796754	0.920325	6.44227					2.07429	1.693	35.1089	Accept	1.382	28.6595	Accept	1.187	24.6157	Accept
	Amidon et al. (2013)	Amid2013-A	Amid2013-004	5	59.99	1.09	5.31	7	61.9343	20.7377	0.334834	0.0937561	0.462651	0.0746971	0.925303	6.47712					1.94429	1.693	35.1089	Accept	1.382	28.6595	Accept	1.187	24.6157	Accept
	Amidon et al. (2013)	Amid2013-A	Amid2013-005	8	71.23	1.02	6.27	7	61.9343	20.7377	0.334834	0.448252	0.673014	0.346029	0.653971	4.5778					9.29571	1.693	35.1089	Accept	1.382	28.6595	Accept	1.187	24.6157	Accept
	Amidon et al. (2013)	Amid2013-A	Amid2013-006	9	51.74	0.82	4.55	7	61.9343	20.7377	0.334834	0.491582	0.311507	0.376985	0.623015	4.3611					10.1943	1.693	35.1089	Accept	1.382	28.6595	Accept	1.187	24.6157	Accept
	Amidon et al. (2013)	Amid2013-A	Amid2013-007	11	93.97	1.53	8.36	7	61.9343	20.7377	0.334834	1.54481	0.938803	0.877607	0.122393	0.856753					32.0357	1.693	35.1089	Accept	1.382	28.6595	Reject
Karakax-A (W Kunlun)	This study	Karakax-A		KG2-1	81.37	3.14	7.75	3	87.26	5.39111	0.0617822	1.09254	0.137298	0.725404	0.274596	0.823789	3	87.26	5.39111	0.0617822	5.89	1.196	6.44777	Accept							3	87.26	5.39111	0.0617822
	This study	Karakax-A		KG2-2	88.46	2.72	8.19	3	87.26	5.39111	0.0617822	0.222589	0.588072	0.176144	0.823856	2.47157					1.2	1.196	6.44777	Accept
	This study	Karakax-A		KG2-3	91.95	2.61	8.45	3	87.26	5.39111	0.0617822	0.86995	0.807836	0.615672	0.384328	1.15298					4.69	1.196	6.44777	Accept
Karakax-B (W Kunlun)	This study	Karakax-B5		LIA-K-1	0.06	0.25	0.25	4	4.1675	4.81674	1.15579	0.852756	0.196897	0.606205	0.393795	1.57518	4	4.1675	4.81674	1.15579	4.1075	1.383	6.66155	Accept							4	4.1675	4.81674	1.15579
	This study	Karakax-B5		LIA-K-2	6.57	0.25	0.61	4	4.1675	4.81674	1.15579	0.498782	0.691033	0.382067	0.617933	2.47173					2.4025	1.383	6.66155	Accept
	This study	Karakax-B5		LIA-K-3	9.79	0.45	0.95	4	4.1675	4.81674	1.15579	1.16728	0.878452	0.756904	0.243096	0.972383					5.6225	1.383	6.66155	Accept
	This study	Karakax-B5		LIA-K-4	0.25	0.04	0.05	4	4.1675	4.81674	1.15579	0.81331	0.20802	0.58396	0.41604	1.66416					3.9175	1.383	6.66155	Accept
Sentsa (Sayan)	Arzhannikov et al. (2012)	Arzh2012-A	Arzh2012-001	SO7BE6	17.86	3.01	3.38	4	18.26	1.39611	0.0764575	0.28651	0.387244	0.225512	0.774488	3.09795	4	18.26	1.39611	0.0764575	0.4	1.383	1.93083	Accept	1.078	1.50501	Accept				3	17.5833	0.42004	0.0238885
	Arzhannikov et al. (2012)	Arzh2012-A	Arzh2012-002	SO7BE7	20.29	0.73	1.89	4	18.26	1.39611	0.0764575	1.45404	0.927032	0.854064	0.145936	0.583745					2.03	1.383	1.93083	Reject
	Arzhannikov et al. (2012)	Arzh2012-A	Arzh2012-003	SO7BE8	17.79	1.11	1.89	4	18.26	1.39611	0.0764575	0.336649	0.368191	0.263618	0.736382	2.94553					0.47	1.383	1.93083	Accept	1.078	1.50501	Accept
	Arzhannikov et al. (2012)	Arzh2012-A	Arzh2012-004	SO7BE9	17.1	0.91	1.73	4	18.26	1.39611	0.0764575	0.830878	0.203021	0.593957	0.406043	1.62417					1.16	1.383	1.93083	Accept	1.078	1.50501	Accept
Jombolok (Sayan)	Arzhannikov et al. (2012)	Arzh2012-B	Arzh2012-005	SO7BE10	26	1.23	2.55	3	24.8733	1.05078	0.0422451	1.07222	0.85819	0.71638	0.28362	0.850861	3	24.8733	1.05078	0.0422451	1.12667	1.196	1.25673	Accept							3	24.8733	1.05078	0.0422451
	Arzhannikov et al. (2012)	Arzh2012-B	Arzh2012-006	SO7BE11	23.92	1.17	2.37	3	24.8733	1.05078	0.0422451	0.907265	0.182133	0.635733	0.364267	1.0928					0.953333	1.196	1.25673	Accept
	Arzhannikov et al. (2012)	Arzh2012-B	Arzh2012-007	SO7BE12	24.7	2.45	3.24	3	24.8733	1.05078	w	0.164957	0.434489	0.131022	0.868978	2.60693					0.173333	1.196	1.25673	Accept
	Arzhannikov et al. (2012)	Arzh2012-C	Arzh2012-008	SO7BE13	26.64	1.18	2.57	3	32.0033	10.2124	0.319104	0.525179	0.299729	0.400541	0.599459	1.79838	3	32.0033	10.2124	0.319104	5.36333	1.196	12.214	Accept							3	32.0033	10.2124	0.319104
	Arzhannikov et al. (2012)	Arzh2012-C	Arzh2012-009	SO7BE14	25.59	2.06	3.01	3	32.0033	10.2124	0.319104	0.627995	0.265004	0.469993	0.530007	1.59002					6.41333	1.196	12.214	Accept
	Arzhannikov et al. (2012)	Arzh2012-C	Arzh2012-010	SO7BE15	43.78	2.62	4.6	3	32.0033	10.2124	0.319104	1.15317	0.87558	0.751161	0.248839	0.746517					11.7767	1.196	12.214	Accept
Sailag (Sayan)	Arzhannikov et al. (2012)	Arzh2012-D	Arzh2012-011	SO7BE16	69.22	4	7.22	12	25.9117	19.1189	0.73785	2.26521	0.98825	0.9765	0.0235	0.282	11	21.9745	14.0526	0.639493	43.3083	1.969	37.6452	Reject							10	17.834	3.14277	0.176224
	Arzhannikov et al. (2012)	Arzh2012-D	Arzh2012-012	SO7BE17	16.75	1	1.75	12	25.9117	19.1189	0.73785	0.479194	0.3159	0.368199	0.631801	7.58161					9.16167	1.969	37.6452	Accept	1.663	31.7948	Accept	1.475	28.2004	Accept
	Arzhannikov et al. (2012)	Arzh2012-D	Arzh2012-013	SO7BE18	17.79	1.24	1.97	12	25.9117	19.1189	0.73785	0.424797	0.335492	0.329015	0.670985	8.05181					8.12167	1.969	37.6452	Accept	1.663	31.7948	Accept	1.475	28.2004	Accept
	Batbaatar and Gillespie (2016)	Arzh2012-D	BatGil2016-011	070802-ag-RSLK-1	20.57	0.87	1.97	12	25.9117	19.1189	0.73785	0.279392	0.389972	0.220056	0.779944	9.35933					5.34167	1.969	37.6452	Accept	1.663	31.7948	Accept	1.475	28.2004	Accept
	Batbaatar and Gillespie (2016)	Arzh2012-D	BatGil2016-012	070802-ag-RSLK-2	22.4	0.97	2.16	12	25.9117	19.1189	0.73785	0.183675	0.427134	0.145731	0.854269	10.2512					3.51167	1.969	37.6452	Accept	1.663	31.7948	Accept	1.475	28.2004	Accept
	Batbaatar and Gillespie (2016)	Arzh2012-D	BatGil2016-013	070802-ag-RSLK-3	20.33	0.84	1.93	12	25.9117	19.1189	0.73785	0.291945	0.385165	0.229671	0.770329	9.24395					5.58167	1.969	37.6452	Accept	1.663	31.7948	Accept	1.475	28.2004	Accept
	Batbaatar and Gillespie (2016)	Arzh2012-D	BatGil2016-014	070802-ag-RSLK-4	63.38	2.24	5.93	12	25.9117	19.1189	0.73785	1.95975	0.974988	0.949975	0.0500249	0.600299					37.4683	1.969	37.6452	Accept	1.663	31.7948	Reject
	Batbaatar and Gillespie (2016)	Arzh2012-D	BatGil2016-015	070802-ag-RSLK-5	19.69	0.85	1.89	12	25.9117	19.1189	0.73785	0.325419	0.372432	0.255136	0.744864	8.93837					6.22167	1.969	37.6452	Accept	1.663	31.7948	Accept	1.475	28.2004	Accept
	Batbaatar and Gillespie (2016)	Arzh2012-D	BatGil2016-016	070802-ag-RSLK-6	13.91	0.62	1.34	12	25.9117	19.1189	0.73785	0.627737	0.265088	0.469824	0.530176	6.36211					12.0017	1.969	37.6452	Accept	1.663	31.7948	Accept	1.475	28.2004	Accept
	Batbaatar and Gillespie (2016)	Arzh2012-D	BatGil2016-017	070802-ag-RSLK-7	16.21	0.6	1.52	12	25.9117	19.1189	0.73785	0.507438	0.305924	0.388152	0.611848	7.34217					9.70167	1.969	37.6452	Accept	1.663	31.7948	Accept	1.475	28.2004	Accept
	Batbaatar and Gillespie (2016)	Arzh2012-D	BatGil2016-018	070802-ag-RSLK-8	12.24	1.1	1.52	12	25.9117	19.1189	0.73785	0.715085	0.237278	0.525444	0.474556	5.69468					13.6717	1.969	37.6452	Accept	1.663	31.7948	Accept	1.475	28.2004	Accept
	Batbaatar and Gillespie (2016)	Arzh2012-D	BatGil2016-019	070802-ag-RSLK-10	18.45	0.82	1.78	12	25.9117	19.1189	0.73785	0.390276	0.348166	0.303668	0.696332	8.35599					7.46167	1.969	37.6452	Accept	1.663	31.7948	Accept	1.475	28.2004	Accept
Gichginii (Gobi-Altai)	Batbaatar et al. (2018)	Batb2018-A	Batb2018-001	GN-AG-10B	6.74	0.22	0.62	4	6.805	1.19592	0.175742	0.0543513	0.478328	0.0433447	0.956655	3.82662	4	6.805	1.19592	0.175742	0.065	1.383	1.65396	Accept							4	6.805	1.19592	0.175742
	Batbaatar et al. (2018)	Batb2018-A	Batb2018-002	GN-AG-11	7.98	0.17	0.7	4	6.805	1.19592	0.175742	0.982504	0.837074	0.674148	0.325852	1.30341					1.175	1.383	1.65396	Accept
	Batbaatar et al. (2018)	Batb2018-A	Batb2018-003	GN-JB-004	5.18	0.33	0.55	4	6.805	1.19592	0.175742	1.35878	0.0871078	0.825784	0.174216	0.696862					1.625	1.383	1.65396	Accept
	Batbaatar et al. (2018)	Batb2018-A	Batb2018-004	GN-JB-005	7.32	0.28	0.69	4	6.805	1.19592	0.175742	0.43063	0.666631	0.333262	0.666738	2.66695					0.515	1.383	1.65396	Accept
	Batbaatar et al. (2018)	Batb2018-B	Batb2018-005	GN-AG-07	1.53	0.09	0.16	5	2.142	0.966395	0.451165	0.633281	0.263275	0.47345	0.52655	2.63275	5	2.142	0.966395	0.451165	0.612	1.509	1.45829	Accept							5	2.142	0.966395	0.451165
	Batbaatar et al. (2018)	Batb2018-B	Batb2018-006	GN-AG-08	3.14	0.07	0.28	5	2.142	0.966395	0.451165	1.0327	0.849129	0.698257	0.301743	1.50871					0.998	1.509	1.45829	Accept
	Batbaatar et al. (2018)	Batb2018-B	Batb2018-007	GN-AG-04	0.78	0.03	0.07	5	2.142	0.966395	0.451165	1.40936	0.0793642	0.841272	0.158728	0.793642					1.362	1.509	1.45829	Accept
	Batbaatar et al. (2018)	Batb2018-B	Batb2018-008	GN-AG-05	2.76	0.08	0.25	5	2.142	0.966395	0.451165	0.63949	0.738748	0.477496	0.522504	2.61252					0.618	1.509	1.45829	Accept
	Batbaatar et al. (2018)	Batb2018-B	Batb2018-009	GN-AG-06	2.5	0.07	0.22	5	2.142	0.966395	0.451165	0.370449	0.644476	0.288952	0.711048	3.55524					0.358	1.509	1.45829	Accept
	Batbaatar et al. (2018)	Batb2018-C	Batb2018-010	GN-JB-001	0.88	0.1	0.12	6	1.41667	0.392768	0.277248	1.36637	0.0859113	0.828177	0.171823	1.03094	6	1.41667	0.392768	0.277248	0.536667	1.61	0.632356	Accept							6	1.41667	0.392768	0.277248
	Batbaatar et al. (2018)	Batb2018-C	Batb2018-011	GN-JB-002	1.02	0.1	0.13	6	1.41667	0.392768	0.277248	1.00993	0.156265	0.687469	0.312531	1.87518					0.396667	1.61	0.632356	Accept
	Batbaatar et al. (2018)	Batb2018-C	Batb2018-012	GN-JB-003	1.44	0.26	0.29	6	1.41667	0.392768	0.277248	0.0594074	0.523686	0.0473724	0.952628	5.71577					0.0233333	1.61	0.632356	Accept
	Batbaatar et al. (2018)	Batb2018-C	Batb2018-013	GN-AG-01	1.79	0.05	0.16	6	1.41667	0.392768	0.277248	0.950519	0.829076	0.658151	0.341849	2.05109					0.373333	1.61	0.632356	Accept
	Batbaatar et al. (2018)	Batb2018-C	Batb2018-014	GN-AG-02	1.83	0.06	0.17	6	1.41667	0.392768	0.277248	1.05236	0.853683	0.707366	0.292634	1.75581					0.413333	1.61	0.632356	Accept
	Batbaatar et al. (2018)	Batb2018-C	Batb2018-015	GN-AG-03	1.54	0.05	0.14	6	1.41667	0.392768	0.277248	0.314011	0.623244	0.246487	0.753513	4.52108					0.123333	1.61	0.632356	Accept
Sutai (Gobi-Altai)	Batbaatar et al. (2018)	Batb2018-E	Batb2018-017	DHC-98-13	25.69	0.81	2.35	4	19.8	8.89258	0.44912	0.66235	0.746126	0.492253	0.507747	2.03099	4	19.8	8.89258	0.44912	5.89	1.383	12.2984	Accept	1.078	9.5862	Accept				3	24.1967	1.62263	0.0670601
	Batbaatar et al. (2018)	Batb2018-E	Batb2018-018	DHC-98-10	22.47	0.68	2.05	4	19.8	8.89258	0.44912	0.30025	0.618007	0.236014	0.763986	3.05595					2.67	1.383	12.2984	Accept	1.078	9.5862	Accept
	Batbaatar et al. (2018)	Batb2018-E	Batb2018-019	DHC-98-11	24.43	1.13	2.38	4	19.8	8.89258	0.44912	0.520659	0.698698	0.397395	0.602605	2.41042					4.63	1.383	12.2984	Accept	1.078	9.5862	Accept
	Batbaatar et al. (2018)	Batb2018-E	Batb2018-020	DHC-98-15	6.61	0.23	0.61	4	19.8	8.89258	0.44912	1.48326	0.0690028	0.861994	0.138006	0.552023					13.19	1.383	12.2984	Reject
	Batbaatar et al. (2018)	Batb2018-F	Batb2018-021	MOT98-CS-11a	44.03	1.13	3.97	3	27.08	15.7307	0.580898	1.07751	0.859373	0.718747	0.281253	0.843759	3	27.08	15.7307	0.580898	16.95	1.196	18.814	Accept							3	27.08	15.7307	0.580898
	Batbaatar et al. (2018)	Batb2018-F	Batb2018-022	MOT98-CS-11b	12.95	0.59	1.26	3	27.08	15.7307	0.580898	0.898242	0.184528	0.630943	0.369057	1.10717					14.13	1.196	18.814	Accept
	Batbaatar et al. (2018)	Batb2018-F	Batb2018-023	MOT98-CS-12	24.26	1.52	2.58	3	27.08	15.7307	0.580898	0.179267	0.428864	0.142272	0.857728	2.57318					2.82	1.196	18.814	Accept
	Batbaatar et al. (2018)	Batb2018-J	Batb2018-029	MOT98-CS-25	5.83	0.22	0.55	5	13.848	4.97693	0.359397	1.61103	0.0535864	0.892827	0.107173	0.535864	5	13.848	4.97693	0.359397	8.018	1.509	7.51019	Reject							4	15.8525	2.49794	0.157574
	Batbaatar et al. (2018)	Batb2018-J	Batb2018-030	SUT-JB-02A	15.1	0.39	1.35	5	13.848	4.97693	0.359397	0.251561	0.59931	0.198619	0.801381	4.0069					1.252	1.509	7.51019	Accept	1.2	5.97232	Accept
	Batbaatar et al. (2018)	Batb2018-J	Batb2018-031	SUT-JB-02B	19.44	0.6	1.77	5	13.848	4.97693	0.359397	1.12358	0.869405	0.73881	0.26119	1.30595					5.592	1.509	7.51019	Accept	1.2	5.97232	Accept
	Batbaatar et al. (2018)	Batb2018-J	Batb2018-032	SUT-JB-02C	13.64	0.36	1.22	5	13.848	4.97693	0.359397	0.0417928	0.483332	0.0333361	0.966664	4.83332					0.208	1.509	7.51019	Accept	1.2	5.97232	Accept
	Batbaatar et al. (2018)	Batb2018-J	Batb2018-033	SUT-JB-02D	15.23	0.47	1.39	5	13.848	4.97693	0.359397	0.277681	0.609371	0.218743	0.781257	3.90629					1.382	1.509	7.51019	Accept	1.2	5.97232	Accept
Ih Bogd (Gobi-Altai)	Batbaatar et al. (2018)	Batb2018-K	Batb2018-034	IB-JB-003E	16.38	1.21	0.78	6	12.8667	3.07881	0.239286	1.14113	0.873093	0.746186	0.253814	1.52289	5	14.018	1.38097	0.0985138	3.51333	1.61	4.95688	Accept	1.299	3.99937	Accept				5	14.018	1.38097	0.0985138
	Batbaatar et al. (2018)	Batb2018-K	Batb2018-035	IB-JB-003A	7.11	0.48	2.05	6	12.8667	3.07881	0.239286	1.86977	0.0307579	0.938484	0.0615157	0.369094					5.75667	1.61	4.95688	Reject
	Batbaatar et al. (2018)	Batb2018-K	Batb2018-036	IB-JB-003B	12.95	1.72	1.4	6	12.8667	3.07881	0.239286	0.0270667	0.510797	0.0215935	0.978407	5.87044					0.0833333	1.61	4.95688	Accept	1.299	3.99937	Accept
	Batbaatar et al. (2018)	Batb2018-K	Batb2018-037	IB-JB-003C	13.97	0.73	1.48	6	12.8667	3.07881	0.239286	0.358364	0.639964	0.279929	0.720071	4.32043					1.10333	1.61	4.95688	Accept	1.299	3.99937	Accept
	Batbaatar et al. (2018)	Batb2018-K	Batb2018-038	IB-JB-003D	13.65	0.91	1.85	6	12.8667	3.07881	0.239286	0.254427	0.600417	0.200835	0.799165	4.79499					0.783333	1.61	4.95688	Accept	1.299	3.99937	Accept
	Batbaatar et al. (2018)	Batb2018-K	Batb2018-039	IB-JB-002	13.14	0.68	1.32	6	12.8667	3.07881	0.239286	0.0887789	0.535371	0.0707424	0.929258	5.57555					0.273333	1.61	4.95688	Accept	1.299	3.99937	Accept
Otgontenger, Bitüüt (Hangai)	Batbaatar et al. (2018)	Batb2018-M	Batb2018-044	DHC-98-5	30.7	0.93	2.8	3	47.11	29.6173	0.628685	0.554067	0.289766	0.420467	0.579533	1.7386	3	47.11	29.6173	0.628685	16.41	1.196	35.4223	Accept							3	47.11	29.6173	0.628685
	Batbaatar et al. (2018)	Batb2018-M	Batb2018-045	DHC-98-7	81.3	2.53	7.52	3	47.11	29.6173	0.628685	1.15439	0.87583	0.75166	0.24834	0.745019					34.19	1.196	35.4223	Accept
	Batbaatar et al. (2018)	Batb2018-M	Batb2018-046	DHC-98-8	29.33	0.89	2.68	3	47.11	29.6173	0.628685	0.600324	0.274145	0.45171	0.54829	1.64487					17.78	1.196	35.4223	Accept
	Batbaatar et al. (2018)	Batb2018-O	Batb2018-048	DHC-98-3	14.7	0.53	1.37	3	15.7333	0.895396	0.0569107	1.15405	0.124239	0.751521	0.248479	0.745436	3	15.7333	0.895396	0.0569107	1.03333	1.196	1.07089	Accept							3	15.7333	0.895396	0.0569107
	Batbaatar et al. (2018)	Batb2018-O	Batb2018-049	MOT98-CS-04	16.22	0.49	1.48	3	15.7333	0.895396	0.0569107	0.543521	0.706615	0.413229	0.586771	1.76031					0.486667	1.196	1.07089	Accept
	Batbaatar et al. (2018)	Batb2018-O	Batb2018-050	MOT98-CS-05	16.28	0.5	1.48	3	15.7333	0.895396	0.0569107	0.610531	0.729245	0.45849	0.54151	1.62453					0.546667	1.196	1.07089	Accept
Bumbat (Hangai)	Batbaatar et al. (2018)	Batb2018-P	Batb2018-051	HN-JB-01B	101.88	2.79	9.35	3	58.89	40.2497	0.683473	1.06808	0.857258	0.714516	0.285484	0.856452	3	58.89	40.2497	0.683473	42.99	1.196	48.1387	Accept							3	58.89	40.2497	0.683473
	Batbaatar et al. (2018)	Batb2018-P	Batb2018-052	HN-JB-01C	52.69	1.41	4.77	3	58.89	40.2497	0.683473	0.154038	0.43879	0.12242	0.87758	2.63274					6.2	1.196	48.1387	Accept
	Batbaatar et al. (2018)	Batb2018-P	Batb2018-053	HN-JB-01A	22.1	1.04	2.16	3	58.89	40.2497	0.683473	0.914043	0.180347	0.639306	0.360694	1.08208					36.79	1.196	48.1387	Accept
	Batbaatar et al. (2018)	Batb2018-Q	Batb2018-054	HN-JB-02A	21.77	0.92	2.08	6	34.6533	9.09901	0.262573	1.4159	0.0784018	0.843196	0.156804	0.940821	6	34.6533	9.09901	0.262573	12.8833	1.61	14.6494	Accept							6	34.6533	9.09901	0.262573
	Batbaatar et al. (2018)	Batb2018-Q	Batb2018-055	HN-JB-02B	38.84	1.63	3.73	6	34.6533	9.09901	0.262573	0.460123	0.677286	0.354572	0.645428	3.87257					4.18667	1.61	14.6494	Accept
	Batbaatar et al. (2018)	Batb2018-Q	Batb2018-056	HN-JB-02C	31.21	1.11	2.91	6	34.6533	9.09901	0.262573	0.378429	0.352556	0.294888	0.705112	4.23067					3.44333	1.61	14.6494	Accept
	Batbaatar et al. (2018)	Batb2018-Q	Batb2018-057	HN-JB-03A	35.9	1.35	3.37	6	34.6533	9.09901	0.262573	0.137011	0.554489	0.108978	0.891022	5.34613					1.24667	1.61	14.6494	Accept
	Batbaatar et al. (2018)	Batb2018-Q	Batb2018-058	HN-JB-03B	31.22	1.76	3.21	6	34.6533	9.09901	0.262573	0.37733	0.352964	0.294072	0.705928	4.23557					3.43333	1.61	14.6494	Accept
	Batbaatar et al. (2018)	Batb2018-Q	Batb2018-059	HN-JB-03C	48.98	1.77	4.59	6	34.6533	9.09901	0.262573	1.57453	0.942317	0.884635	0.115365	0.692191					14.3267	1.61	14.6494	Accept
Mönh-Saridag (Sayan)	Batbaatar and Gillespie (2016)	BatGil2016-B	BatGil2016-003	070402-ag-RMS-3	10.52	0.4	0.98	3	10.1033	0.492375	0.0487339	0.846238	0.80129	0.60258	0.39742	1.19226	3	10.1033	0.492375	0.0487339	0.416667	1.196	0.588881	Accept							3	10.1033	0.492375	0.0487339
	Batbaatar and Gillespie (2016)	BatGil2016-B	BatGil2016-004	070402-ag-RMS-4	10.23	0.55	1.03	3	10.1033	0.492375	0.0487339	0.257256	0.60151	0.203019	0.796981	2.39094					0.126667	1.196	0.588881	Accept
	Batbaatar and Gillespie (2016)	BatGil2016-B	BatGil2016-005	070402-ag-RMS-5	9.56	0.48	0.95	3	10.1033	0.492375	0.0487339	1.10349	0.134906	0.730188	0.269812	0.809437					0.543333	1.196	0.588881	Accept
	Batbaatar and Gillespie (2016)	BatGil2016-D	BatGil2016-008	070402-ag-RMS-8A	25.85	0.77	2.35	3	24.4867	4.2522	0.173654	0.320618	0.62575	0.2515	0.7485	2.2455	3	24.4867	4.2522	0.173654	1.36333	1.196	5.08564	Accept							3	24.4867	4.2522	0.173654
	Batbaatar and Gillespie (2016)	BatGil2016-D	BatGil2016-009	070402-ag-RMS-8B	19.72	0.59	1.79	3	24.4867	4.2522	0.173654	1.12099	0.131147	0.737707	0.262293	0.78688					4.76667	1.196	5.08564	Accept
	Batbaatar and Gillespie (2016)	BatGil2016-D	BatGil2016-010	070402-ag-RMS-9	27.89	0.75	2.51	3	24.4867	4.2522	0.173654	0.800369	0.788252	0.576503	0.423497	1.27049					3.40333	1.196	5.08564	Accept
Jombolok (Sayan)	Batbaatar and Gillespie (2016)	BatGil2016-E	BatGil2016-020	071002-ag-RDJO-1	19.51	0.89	1.89	4	24.14	6.68236	0.276817	0.692868	0.244196	0.511608	0.488392	1.95357	4	24.14	6.68236	0.276817	4.63	1.383	9.24171	Accept	1.078	7.20359	Accept				3	20.8633	1.60054	0.0767155
	Batbaatar and Gillespie (2016)	BatGil2016-E	BatGil2016-021	071002-ag-RDJO-2	20.45	0.92	1.98	4	24.14	6.68236	0.276817	0.5522	0.290406	0.419188	0.580812	2.32325					3.69	1.383	9.24171	Accept	1.078	7.20359	Accept
	Batbaatar and Gillespie (2016)	BatGil2016-E	BatGil2016-022	071002-ag-RDJO-3	33.97	2.22	3.67	4	24.14	6.68236	0.276817	1.47104	0.929359	0.858719	0.141281	0.565125					9.83	1.383	9.24171	Reject
	Batbaatar and Gillespie (2016)	BatGil2016-E	BatGil2016-023	071002-ag-RDJO-5	22.63	1.61	2.52	4	24.14	6.68236	0.276817	0.225968	0.410613	0.178774	0.821226	3.28491					1.51	1.383	9.24171	Accept	1.078	7.20359	Accept
Gyalgar (Hangai)	Batbaatar and Gillespie (2016)	BatGil2016-L	BatGil2016-035	ZAG-ARG-02B	16.93	0.67	1.6	3	64.82	78.4367	1.21007	0.610556	0.270747	0.458506	0.541494	1.62448	3	64.82	78.4367	1.21007	47.89	1.196	93.8103	Accept							3	64.82	78.4367	1.21007
	Batbaatar and Gillespie (2016)	BatGil2016-L	BatGil2016-036	ZAG-ARG-03A	22.19	1.3	2.31	3	64.82	78.4367	1.21007	0.543495	0.293394	0.413211	0.586789	1.76037					42.63	1.196	93.8103	Accept
	Batbaatar and Gillespie (2016)	BatGil2016-L	BatGil2016-037	ZAG-ARG-03B	155.34	6.83	15.39	3	64.82	78.4367	1.21007	1.15405	0.87576	0.751521	0.248479	0.745437					90.52	1.196	93.8103	Accept
	Batbaatar and Gillespie (2016)	BatGil2016-N	BatGil2016-039	ZAG-SB-04A	25.12	0.72	2.27	3	31.49	15.2293	0.483622	0.418273	0.337874	0.324253	0.675747	2.02724	3	31.49	15.2293	0.483622	6.37	1.196	18.2142	Accept							3	31.49	15.2293	0.483622
	Batbaatar and Gillespie (2016)	BatGil2016-N	BatGil2016-040	ZAG-SB-04B	48.87	1.09	4.36	3	31.49	15.2293	0.483622	1.14122	0.873112	0.746223	0.253777	0.761331					17.38	1.196	18.2142	Accept
	Batbaatar and Gillespie (2016)	BatGil2016-N	BatGil2016-041	ZAG-SB-04C	20.48	0.59	1.85	3	31.49	15.2293	0.483622	0.72295	0.234855	0.530289	0.469711	1.40913					11.01	1.196	18.2142	Accept
Koyandy (W Tian Shan)	Blomdin et al. (2016)	Blom-E	Blom-016	TS-C-12-028	5.33	0.23	0.51	5	2.104	2.12153	1.00833	1.5206	0.93582	0.87164	0.12836	0.641798	5	2.104	2.12153	1.00833	3.226	1.509	3.20139	Reject							4	1.2975	1.29031	0.994456
	Blomdin et al. (2016)	Blom-E	Blom-017	TS-C-12-029	3.21	0.19	0.33	5	2.104	2.12153	1.00833	0.521322	0.698929	0.397858	0.602142	3.01071					1.106	1.509	3.20139	Accept	1.2	2.54583	Accept
	Blomdin et al. (2016)	Blom-E	Blom-018	TS-C-12-031	0.93	0.04	0.09	5	2.104	2.12153	1.00833	0.553375	0.290003	0.419993	0.580007	2.90003					1.174	1.509	3.20139	Accept	1.2	2.54583	Accept
	Blomdin et al. (2016)	Blom-E	Blom-019	TS-C-12-030	0.59	0.08	0.09	5	2.104	2.12153	1.00833	0.713637	0.237726	0.524548	0.475452	2.37726					1.514	1.509	3.20139	Accept	1.2	2.54583	Accept
	Blomdin et al. (2016)	Blom-E	Blom-020	TS-C-12-027	0.46	0.07	0.08	5	2.104	2.12153	1.00833	0.774913	0.219195	0.561609	0.438391	2.19195					1.644	1.509	3.20139	Accept	1.2	2.54583	Accept
	Blomdin et al. (2016)	Blom-F	Blom-021	TS-C-12-050	17.22	0.36	1.52	5	14.49	3.40878	0.23525	0.800874	0.788398	0.576795	0.423205	2.11602	5	14.49	3.40878	0.23525	2.73	1.509	5.14384	Accept							5	14.49	3.40878	0.23525
	Blomdin et al. (2016)	Blom-F	Blom-022	TS-C-12-049	17.13	0.41	1.53	5	14.49	3.40878	0.23525	0.774472	0.780674	0.561348	0.438652	2.19326					2.64	1.509	5.14384	Accept
	Blomdin et al. (2016)	Blom-F	Blom-023	TS-C-12-047	16.39	0.34	1.45	5	14.49	3.40878	0.23525	0.557385	0.711368	0.422736	0.577264	2.88632					1.9	1.509	5.14384	Accept
	Blomdin et al. (2016)	Blom-F	Blom-024	TS-C-12-046	11.86	0.26	1.05	5	14.49	3.40878	0.23525	0.771538	0.220194	0.559612	0.440388	2.20194					2.63	1.509	5.14384	Accept
	Blomdin et al. (2016)	Blom-F	Blom-025	TS-C-12-048	9.85	0.24	0.88	5	14.49	3.40878	0.23525	1.36119	0.0867264	0.826547	0.173453	0.867264					4.64	1.509	5.14384	Accept
Tomort (E Tian Shan)	Chen et al. (2015)	Chen2015-B	Chen2015-012	YW-09-6-1	14.45	0.51	1.34	3	15.52	1.72502	0.111148	0.620282	0.267536	0.464928	0.535072	1.60522	3	15.52	1.72502	0.111148	1.07	1.196	2.06313	Accept							3	15.52	1.72502	0.111148
	Chen et al. (2015)	Chen2015-B	Chen2015-013	YW-09-6-4	14.6	0.43	1.32	3	15.52	1.72502	0.111148	0.533327	0.296904	0.406192	0.593808	1.78142					0.92	1.196	2.06313	Accept
	Chen et al. (2015)	Chen2015-B	Chen2015-014	YW-09-6-5	17.51	0.45	1.57	3	15.52	1.72502	0.111148	1.15361	0.87567	0.751339	0.248661	0.745982					1.99	1.196	2.06313	Accept
Samdain Kangsang (Inner Tibet)	Chevalier et al. (2011)	Chev2011-A	Chev2011-001	T5C-58	17.46	0.34	1.54	7	18.3957	0.980134	0.0532805	0.95468	0.16987	0.660261	0.339739	2.37818	7	18.3957	0.980134	0.0532805	0.935714	1.693	1.65937	Accept							7	18.3957	0.980134	0.0532805
	Chevalier et al. (2011)	Chev2011-A	Chev2011-002	T5C-59	17.82	0.34	1.57	7	18.3957	0.980134	0.0532805	0.587383	0.278473	0.443054	0.556946	3.89862					0.575714	1.693	1.65937	Accept
	Chevalier et al. (2011)	Chev2011-A	Chev2011-003	T5C-60	18.45	0.33	1.62	7	18.3957	0.980134	0.0532805	0.055386	0.522085	0.0441691	0.955831	6.69082					0.0542857	1.693	1.65937	Accept
	Chevalier et al. (2011)	Chev2011-A	Chev2011-004	T5C-61	17.26	0.36	1.52	7	18.3957	0.980134	0.0532805	1.15873	0.123282	0.753435	0.246565	1.72595					1.13571	1.693	1.65937	Accept
	Chevalier et al. (2011)	Chev2011-A	Chev2011-005	T5C-62	18.5	0.53	1.67	7	18.3957	0.980134	0.0532805	0.106399	0.542367	0.0847346	0.915265	6.40686					0.104286	1.693	1.65937	Accept
	Chevalier et al. (2011)	Chev2011-A	Chev2011-006	T5C-63	19.36	0.49	1.73	7	18.3957	0.980134	0.0532805	0.983831	0.837401	0.674801	0.325199	2.27639					0.964286	1.693	1.65937	Accept
	Chevalier et al. (2011)	Chev2011-A	Chev2011-007	T5C-64	19.92	0.5	1.78	7	18.3957	0.980134	0.0532805	1.55518	0.940049	0.880097	0.119903	0.83932					1.52429	1.693	1.65937	Accept
W Himalaya	Chevalier et al. (2011)	Chev2011-AB	Chev2011-205	CK-40	144.85	2.89	13.15	7	159.524	29.4105	0.184364	0.498947	0.308908	0.382183	0.617817	4.32472	7	159.524	29.4105	0.184364	14.6743	1.693	49.792	Accept							7	159.524	29.4105	0.184364
	Chevalier et al. (2011)	Chev2011-AB	Chev2011-206	CK-43	132.03	3.15	12.07	7	159.524	29.4105	0.184364	0.934846	0.174934	0.650132	0.349868	2.44908					27.4943	1.693	49.792	Accept
	Chevalier et al. (2011)	Chev2011-AB	Chev2011-207	CK-44	189.83	4.2	17.51	7	159.524	29.4105	0.184364	1.03044	0.848598	0.697196	0.302804	2.11963					30.3057	1.693	49.792	Accept
	Chevalier et al. (2011)	Chev2011-AB	Chev2011-208	CK-45	159.14	3.24	14.51	7	159.524	29.4105	0.184364	0.0130663	0.494787	0.0104251	0.989575	6.92702					0.384286	1.693	49.792	Accept
	Chevalier et al. (2011)	Chev2011-AB	Chev2011-209	CK-46	204.46	2.59	18.56	7	159.524	29.4105	0.184364	1.52788	0.936729	0.873458	0.126542	0.885797					44.9357	1.693	49.792	Accept
	Chevalier et al. (2011)	Chev2011-AB	Chev2011-210	CK-47	123.86	1.85	11.06	7	159.524	29.4105	0.184364	1.21264	0.112634	0.774732	0.225268	1.57688					35.6643	1.693	49.792	Accept
	Chevalier et al. (2011)	Chev2011-AB	Chev2011-211	CK-48	162.5	4.8	15.23	7	159.524	29.4105	0.184364	0.101179	0.540296	0.0805913	0.919409	6.43586					2.97571	1.693	49.792	Accept
	Chevalier et al. (2011)	Chev2011-AC	Chev2011-212	CK-50	17.27	0.47	1.55	3	65.1667	43.7135	0.670795	1.0957	0.136606	0.726788	0.273212	0.819637	3	65.1667	43.7135	0.670795	47.8967	1.196	52.2813	Accept							3	65.1667	43.7135	0.670795
	Chevalier et al. (2011)	Chev2011-AC	Chev2011-213	CK-52	102.91	1.85	9.2	3	65.1667	43.7135	0.670795	0.863425	0.806048	0.612096	0.387904	1.16371					37.7433	1.196	52.2813	Accept
	Chevalier et al. (2011)	Chev2011-AC	Chev2011-214	CK-53	75.32	1.52	6.73	3	65.1667	43.7135	0.670795	0.23227	0.591836	0.183672	0.816328	2.44898					10.1533	1.196	52.2813	Accept
	Chevalier et al. (2011)	Chev2011-AD	Chev2011-215	CK-54	61.34	1.48	5.52	8	59.12	21.8996	0.370427	0.101372	0.540372	0.0807445	0.919255	7.35404	8	59.12	21.8996	0.370427	2.22	1.763	38.609	Accept							8	59.12	21.8996	0.370427
	Chevalier et al. (2011)	Chev2011-AD	Chev2011-216	CK-55	42.77	0.86	3.79	8	59.12	21.8996	0.370427	0.746588	0.227656	0.544688	0.455312	3.6425					16.35	1.763	38.609	Accept
	Chevalier et al. (2011)	Chev2011-AD	Chev2011-217	CK-56	52.8	1.28	4.74	8	59.12	21.8996	0.370427	0.288589	0.386448	0.227104	0.772896	6.18317					6.32	1.763	38.609	Accept
	Chevalier et al. (2011)	Chev2011-AD	Chev2011-218	CK-57	82.86	1.72	7.42	8	59.12	21.8996	0.370427	1.08404	0.860826	0.721651	0.278349	2.22679					23.74	1.763	38.609	Accept
	Chevalier et al. (2011)	Chev2011-AD	Chev2011-219	CK-58	26.68	0.73	2.41	8	59.12	21.8996	0.370427	1.4813	0.0692628	0.861474	0.138526	1.10821					32.44	1.763	38.609	Accept
	Chevalier et al. (2011)	Chev2011-AD	Chev2011-220	CK-60	41.45	1.53	3.89	8	59.12	21.8996	0.370427	0.806863	0.209873	0.580255	0.419745	3.35796					17.67	1.763	38.609	Accept
	Chevalier et al. (2011)	Chev2011-AD	Chev2011-221	CK-61	85.75	2.35	7.84	8	59.12	21.8996	0.370427	1.216	0.888008	0.776016	0.223984	1.79187					26.63	1.763	38.609	Accept
	Chevalier et al. (2011)	Chev2011-AD	Chev2011-222	CK-63	79.31	3.14	7.59	8	59.12	21.8996	0.370427	0.921933	0.821718	0.643437	0.356563	2.85251					20.19	1.763	38.609	Accept
Samdain Kangsang (Inner Tibet)	Chevalier et al. (2011)	Chev2011-B	Chev2011-008	T5C-66	23.79	0.6	2.13	8	20.49	1.83037	0.08933	1.80291	0.964299	0.928598	0.0714018	0.571215	8	20.49	1.83037	0.08933	3.3	1.763	3.22694	Reject							7	20.0186	1.35438	0.0676562
	Chevalier et al. (2011)	Chev2011-B	Chev2011-009	T5C-67	20.47	0.51	1.83	8	20.49	1.83037	0.08933	0.0109267	0.495641	0.00871811	0.991282	7.93026					0.02	1.763	3.22694	Accept	1.453	2.65953	Accept
	Chevalier et al. (2011)	Chev2011-B	Chev2011-010	T5C-68	19.96	0.53	1.79	8	20.49	1.83037	0.08933	0.289559	0.386077	0.227846	0.772154	6.17723					0.53	1.763	3.22694	Accept	1.453	2.65953	Accept
	Chevalier et al. (2011)	Chev2011-B	Chev2011-011	T5C-69	19.72	0.49	1.76	8	20.49	1.83037	0.08933	0.42068	0.336994	0.326011	0.673989	5.39191					0.77	1.763	3.22694	Accept	1.453	2.65953	Accept
	Chevalier et al. (2011)	Chev2011-B	Chev2011-012	T5C-70	19.63	0.61	1.79	8	20.49	1.83037	0.08933	0.46985	0.319231	0.361538	0.638462	5.1077					0.86	1.763	3.22694	Accept	1.453	2.65953	Accept
	Chevalier et al. (2011)	Chev2011-B	Chev2011-013	T5C-71	22.71	0.71	2.08	8	20.49	1.83037	0.08933	1.21287	0.88741	0.77482	0.22518	1.80144					2.22	1.763	3.22694	Accept	1.453	2.65953	Accept
	Chevalier et al. (2011)	Chev2011-B	Chev2011-014	T5C-72	18.35	0.45	1.64	8	20.49	1.83037	0.08933	1.16916	0.121169	0.757662	0.242338	1.93871					2.14	1.763	3.22694	Accept	1.453	2.65953	Accept
	Chevalier et al. (2011)	Chev2011-B	Chev2011-015	T5C-73	19.29	0.47	1.72	8	20.49	1.83037	0.08933	0.655605	0.256039	0.487922	0.512078	4.09663					1.2	1.763	3.22694	Accept	1.453	2.65953	Accept
Nyainqentanghla (Inner Tibet)	Chevalier et al. (2011)	Chev2011-C	Chev2011-016	T5C-19	12.04	0.33	1.08	5	15.468	4.75344	0.307308	0.721162	0.235405	0.52919	0.47081	2.35405	5	15.468	4.75344	0.307308	3.428	1.509	7.17294	Accept	1.2	5.70413	Accept				4	13.505	2.1066	0.155987
	Chevalier et al. (2011)	Chev2011-C	Chev2011-017	T5C-20	14.46	0.29	1.27	5	15.468	4.75344	0.307308	0.212057	0.416031	0.167937	0.832063	4.16031					1.008	1.509	7.17294	Accept	1.2	5.70413	Accept
	Chevalier et al. (2011)	Chev2011-C	Chev2011-018	T5C-21	11.51	0.23	1.01	5	15.468	4.75344	0.307308	0.832661	0.202518	0.594964	0.405036	2.02518					3.958	1.509	7.17294	Accept	1.2	5.70413	Accept
	Chevalier et al. (2011)	Chev2011-C	Chev2011-019	T5C-22	23.32	0.41	2.04	5	15.468	4.75344	0.307308	1.65186	0.950718	0.901436	0.0985637	0.492818					7.852	1.509	7.17294	Reject
	Chevalier et al. (2011)	Chev2011-C	Chev2011-020	T5C-23	16.01	0.32	1.41	5	15.468	4.75344	0.307308	0.114023	0.54539	0.0907802	0.90922	4.5461					0.542	1.509	7.17294	Accept	1.2	5.70413	Accept
	Chevalier et al. (2011)	Chev2011-D	Chev2011-021	T5C-25	37.99	0.69	3.35	10	35.01	13.079	0.37358	0.227846	0.590117	0.180234	0.819766	8.19766	10	35.01	13.079	0.37358	2.98	1.878	24.5624	Accept	1.57	20.5341	Accept				9	31.7067	8.34766	0.263278
	Chevalier et al. (2011)	Chev2011-D	Chev2011-022	T5C-26	31.1	0.56	2.73	10	35.01	13.079	0.37358	0.298952	0.382488	0.235023	0.764977	7.64977					3.91	1.878	24.5624	Accept	1.57	20.5341	Accept
	Chevalier et al. (2011)	Chev2011-D	Chev2011-023	T5C-27	25.44	0.5	2.24	10	35.01	13.079	0.37358	0.731706	0.232174	0.535652	0.464348	4.64348					9.57	1.878	24.5624	Accept	1.57	20.5341	Accept
	Chevalier et al. (2011)	Chev2011-D	Chev2011-024	T5C-28	36.36	0.95	3.27	10	35.01	13.079	0.37358	0.103219	0.541105	0.0822106	0.917789	9.17789					1.35	1.878	24.5624	Accept	1.57	20.5341	Accept
	Chevalier et al. (2011)	Chev2011-D	Chev2011-025	T5C-29	42.56	0.99	3.8	10	35.01	13.079	0.37358	0.57726	0.718118	0.436236	0.563764	5.63764					7.55	1.878	24.5624	Accept	1.57	20.5341	Accept
	Chevalier et al. (2011)	Chev2011-D	Chev2011-026	T5C-30	64.74	1.41	5.79	10	35.01	13.079	0.37358	2.27311	0.98849	0.97698	0.0230198	0.230198					29.73	1.878	24.5624	Reject
	Chevalier et al. (2011)	Chev2011-D	Chev2011-027	T5C-31	21.18	0.4	1.86	10	35.01	13.079	0.37358	1.05742	0.14516	0.709679	0.290321	2.90321					13.83	1.878	24.5624	Accept	1.57	20.5341	Accept
	Chevalier et al. (2011)	Chev2011-D	Chev2011-028	T5C-32	19.43	0.35	1.7	10	35.01	13.079	0.37358	1.19122	0.116784	0.766433	0.233567	2.33567					15.58	1.878	24.5624	Accept	1.57	20.5341	Accept
	Chevalier et al. (2011)	Chev2011-D	Chev2011-029	T5C-33	30.84	0.56	2.71	10	35.01	13.079	0.37358	0.318831	0.374927	0.250145	0.749855	7.49855					4.17	1.878	24.5624	Accept	1.57	20.5341	Accept
	Chevalier et al. (2011)	Chev2011-D	Chev2011-030	T5C-34	40.46	0.73	3.56	10	35.01	13.079	0.37358	0.416698	0.66155	0.3231	0.6769	6.769					5.45	1.878	24.5624	Accept	1.57	20.5341	Accept
	Chevalier et al. (2011)	Chev2011-E	Chev2011-031	T5C-35	21.34	0.38	1.87	10	50.321	14.0831	0.279865	2.05786	0.0198019	0.960396	0.0396037	0.396037	10	50.321	14.0831	0.279865	28.981	1.878	26.448	Reject							9	53.5411	10.3186	0.192722
	Chevalier et al. (2011)	Chev2011-E	Chev2011-032	T5C-36	56.6	1.22	5.05	10	50.321	14.0831	0.279865	0.445854	0.672149	0.344297	0.655703	6.55703					6.279	1.878	26.448	Accept	1.57	22.1104	Accept
	Chevalier et al. (2011)	Chev2011-E	Chev2011-033	T5C-37	52.08	0.93	4.6	10	50.321	14.0831	0.279865	0.124902	0.549699	0.0993985	0.900601	9.00601					1.759	1.878	26.448	Accept	1.57	22.1104	Accept
	Chevalier et al. (2011)	Chev2011-E	Chev2011-034	T5C-38	63.84	1.12	5.65	10	50.321	14.0831	0.279865	0.959946	0.831459	0.662917	0.337083	3.37083					13.519	1.878	26.448	Accept	1.57	22.1104	Accept
	Chevalier et al. (2011)	Chev2011-E	Chev2011-035	T5C-39	45.1	0.8	3.98	10	50.321	14.0831	0.279865	0.370728	0.35542	0.28916	0.71084	7.1084					5.221	1.878	26.448	Accept	1.57	22.1104	Accept
	Chevalier et al. (2011)	Chev2011-E	Chev2011-036	T5C-40	51.54	0.98	4.56	10	50.321	14.0831	0.279865	0.0865577	0.534488	0.0689769	0.931023	9.31023					1.219	1.878	26.448	Accept	1.57	22.1104	Accept
	Chevalier et al. (2011)	Chev2011-E	Chev2011-037	T5C-41	54.85	0.97	4.85	10	50.321	14.0831	0.279865	0.321591	0.626119	0.252238	0.747762	7.47762					4.529	1.878	26.448	Accept	1.57	22.1104	Accept
	Chevalier et al. (2011)	Chev2011-E	Chev2011-038	T5C-42	64.19	1.21	5.7	10	50.321	14.0831	0.279865	0.984798	0.837638	0.675277	0.324723	3.24723					13.869	1.878	26.448	Accept	1.57	22.1104	Accept
	Chevalier et al. (2011)	Chev2011-E	Chev2011-039	T5C-43	31.77	0.46	2.77	10	50.321	14.0831	0.279865	1.31725	0.0938768	0.812246	0.187754	1.87754					18.551	1.878	26.448	Accept	1.57	22.1104	Accept
	Chevalier et al. (2011)	Chev2011-E	Chev2011-040	T5C-44	61.9	1.65	5.62	10	50.321	14.0831	0.279865	0.822192	0.794516	0.589032	0.410968	4.10968					11.579	1.878	26.448	Accept	1.57	22.1104	Accept
Xainza (Inner Tibet)	Chevalier et al. (2011)	Chev2011-G	Chev2011-044	T7C-11	155.04	1.22	13.82	3	87.1733	59.05	0.677386	1.14931	0.874786	0.749571	0.250429	0.751287	3	87.1733	59.05	0.677386	67.8667	1.196	70.6238	Accept							3	87.1733	59.05	0.677386
	Chevalier et al. (2011)	Chev2011-G	Chev2011-045	T7C-15	58.94	0.73	5.16	3	87.1733	59.05	0.677386	0.478126	0.31628	0.367439	0.632561	1.89768					28.2333	1.196	70.6238	Accept
	Chevalier et al. (2011)	Chev2011-G	Chev2011-047	T7C-18	47.54	0.66	4.16	3	87.1733	59.05	0.677386	0.671183	0.251052	0.497896	0.502104	1.50631					39.6333	1.196	70.6238	Accept
	Chevalier et al. (2011)	Chev2011-J	Chev2011-050	T7C-19	304.18	4.18	28.35	4	432.623	240.333	0.555526	0.534436	0.29652	0.40696	0.59304	2.37216	4	432.623	240.333	0.555526	128.442	1.383	332.38	Accept	1.078	259.079	Accept				4	432.623	240.333	0.555526
	Chevalier et al. (2011)	Chev2011-J	Chev2011-052	T7C-21	435.53	4.36	41.76	4	432.623	240.333	0.555526	0.0120978	0.504826	0.00965241	0.990348	3.96139					2.9075	1.383	332.38	Accept	1.078	259.079	Accept
	Chevalier et al. (2011)	Chev2011-J	Chev2011-053	T7C-22	768.24	6.41	80.21	4	432.623	240.333	0.555526	1.39647	0.918713	0.837427	0.162573	0.650293					335.618	1.383	332.38	Reject
	Chevalier et al. (2011)	Chev2011-J	Chev2011-054	T7C-23	222.54	2.45	20.24	4	432.623	240.333	0.555526	0.874131	0.191023	0.617953	0.382047	1.52819					210.083	1.383	332.38	Accept	1.078	259.079	Accept
	Chevalier et al. (2011)	Chev2011-K	Chev2011-056	T7C-25	45.5	0.69	3.99	5	46.12	2.90968	0.0630894	0.213082	0.415632	0.168737	0.831263	4.15632	5	46.12	2.90968	0.0630894	0.62	1.509	4.39071	Accept							5	46.12	2.90968	0.0630894
	Chevalier et al. (2011)	Chev2011-K	Chev2011-057	T7C-26	45.94	0.55	4	5	46.12	2.90968	0.0630894	0.0618624	0.475336	0.0493276	0.950672	4.75336					0.18	1.509	4.39071	Accept
	Chevalier et al. (2011)	Chev2011-K	Chev2011-058	T7C-27	49.31	0.74	4.33	5	46.12	2.90968	0.0630894	1.09634	0.863535	0.72707	0.27293	1.36465					3.19	1.509	4.39071	Accept
	Chevalier et al. (2011)	Chev2011-K	Chev2011-059	T7C-28	41.73	0.61	3.65	5	46.12	2.90968	0.0630894	1.50876	0.0656806	0.868639	0.131361	0.656806					4.39	1.509	4.39071	Accept
	Chevalier et al. (2011)	Chev2011-K	Chev2011-060	T7C-30	48.12	0.54	4.19	5	46.12	2.90968	0.0630894	0.68736	0.754072	0.508144	0.491856	2.45928					2	1.509	4.39071	Accept
	Chevalier et al. (2011)	Chev2011-L	Chev2011-061	T7C-32	17.54	0.25	1.52	7	14.2143	1.72139	0.121103	1.93199	0.97332	0.946639	0.0533608	0.373525	6	13.66	0.987461	0.0722885	3.32571	1.693	2.91432	Reject							6	13.66	0.987461	0.0722885
	Chevalier et al. (2011)	Chev2011-L	Chev2011-062	T7C-33	12.57	0.27	1.11	7	14.2143	1.72139	0.121103	0.955206	0.169737	0.660527	0.339473	2.37631					1.64429	1.693	2.91432	Accept	1.382	2.37897	Accept
	Chevalier et al. (2011)	Chev2011-L	Chev2011-063	T7C-34	12.76	0.21	1.11	7	14.2143	1.72139	0.121103	0.844831	0.199103	0.601795	0.398205	2.78744					1.45429	1.693	2.91432	Accept	1.382	2.37897	Accept
	Chevalier et al. (2011)	Chev2011-L	Chev2011-064	T7C-35	14.4	0.24	1.26	7	14.2143	1.72139	0.121103	0.107886	0.542957	0.0859139	0.914086	6.3986					0.185714	1.693	2.91432	Accept	1.382	2.37897	Accept
	Chevalier et al. (2011)	Chev2011-L	Chev2011-065	T7C-36	13.22	0.3	1.17	7	14.2143	1.72139	0.121103	0.577605	0.281765	0.436469	0.563531	3.94472					0.994286	1.693	2.91432	Accept	1.382	2.37897	Accept
	Chevalier et al. (2011)	Chev2011-L	Chev2011-066	T7C-37	13.91	0.32	1.23	7	14.2143	1.72139	0.121103	0.176767	0.429846	0.140309	0.859691	6.01784					0.304286	1.693	2.91432	Accept	1.382	2.37897	Accept
	Chevalier et al. (2011)	Chev2011-L	Chev2011-067	T7C-39	15.1	0.29	1.33	7	14.2143	1.72139	0.121103	0.514533	0.69656	0.393121	0.606879	4.24815					0.885714	1.693	2.91432	Accept	1.382	2.37897	Accept
	Chevalier et al. (2011)	Chev2011-M	Chev2011-068	T7C-40	54.57	0.61	4.76	11	38.0609	14.241	0.374164	1.15926	0.876826	0.753651	0.246349	2.70984	11	38.0609	14.241	0.374164	16.5091	1.925	27.414	Accept							11	38.0609	14.241	0.374164
	Chevalier et al. (2011)	Chev2011-M	Chev2011-069	T7C-41	49	0.63	4.28	11	38.0609	14.241	0.374164	0.76814	0.778798	0.557596	0.442404	4.86645					10.9391	1.925	27.414	Accept
	Chevalier et al. (2011)	Chev2011-M	Chev2011-070	T7C-42	37.41	0.46	3.26	11	38.0609	14.241	0.374164	0.0457067	0.481772	0.0364559	0.963544	10.599					0.650909	1.925	27.414	Accept
	Chevalier et al. (2011)	Chev2011-M	Chev2011-071	T7C-43	16.93	0.25	1.47	11	38.0609	14.241	0.374164	1.48381	0.0689301	0.86214	0.13786	1.51646					21.1309	1.925	27.414	Accept
	Chevalier et al. (2011)	Chev2011-M	Chev2011-072	T7C-44	47.18	0.78	4.15	11	38.0609	14.241	0.374164	0.64034	0.739024	0.478048	0.521952	5.74147					9.11909	1.925	27.414	Accept
	Chevalier et al. (2011)	Chev2011-M	Chev2011-073	T7C-45	24.15	0.31	2.1	11	38.0609	14.241	0.374164	0.97682	0.164329	0.671342	0.328658	3.61524					13.9109	1.925	27.414	Accept
	Chevalier et al. (2011)	Chev2011-M	Chev2011-074	T7C-46	59.39	0.6	5.18	11	38.0609	14.241	0.374164	1.49772	0.932897	0.865795	0.134205	1.47626					21.3291	1.925	27.414	Accept
	Chevalier et al. (2011)	Chev2011-M	Chev2011-075	T7C-47	39.79	0.4	3.45	11	38.0609	14.241	0.374164	0.121416	0.548319	0.0966387	0.903361	9.93697					1.72909	1.925	27.414	Accept
	Chevalier et al. (2011)	Chev2011-M	Chev2011-076	T7C-49	17.13	0.25	1.49	11	38.0609	14.241	0.374164	1.46976	0.0708131	0.858374	0.141626	1.55789					20.9309	1.925	27.414	Accept
	Chevalier et al. (2011)	Chev2011-M	Chev2011-077	T7C-50	38.98	0.5	3.4	11	38.0609	14.241	0.374164	0.0645383	0.525729	0.0514584	0.948542	10.434					0.919091	1.925	27.414	Accept
	Chevalier et al. (2011)	Chev2011-M	Chev2011-078	T7C-51	34.14	0.48	2.98	11	38.0609	14.241	0.374164	0.275325	0.391533	0.216934	0.783066	8.61373					3.92091	1.925	27.414	Accept
	Chevalier et al. (2011)	Chev2011-N	Chev2011-079	T7C-63	30.44	0.39	2.65	9	32.1633	2.82302	0.0877714	0.610457	0.27078	0.458441	0.541559	4.87403	8	31.4612	2.00945	0.0638707	1.72333	1.824	5.14919	Accept	1.515	4.27688	Accept				8	31.4612	2.00945	0.0638707
	Chevalier et al. (2011)	Chev2011-N	Chev2011-080	T7C-64	28.78	0.39	2.5	9	32.1633	2.82302	0.0877714	1.19848	0.115365	0.76927	0.23073	2.07657					3.38333	1.824	5.14919	Accept	1.515	4.27688	Accept
	Chevalier et al. (2011)	Chev2011-N	Chev2011-081	T7C-65	32.42	0.46	2.83	9	32.1633	2.82302	0.0877714	0.0909191	0.536222	0.0724432	0.927557	8.34801					0.256667	1.824	5.14919	Accept	1.515	4.27688	Accept
	Chevalier et al. (2011)	Chev2011-N	Chev2011-082	T7C-66	31.3	0.75	2.8	9	32.1633	2.82302	0.0877714	0.305819	0.379871	0.240257	0.759743	6.83768					0.863333	1.824	5.14919	Accept	1.515	4.27688	Accept
	Chevalier et al. (2011)	Chev2011-N	Chev2011-083	T7C-68	33.36	0.42	2.9	9	32.1633	2.82302	0.0877714	0.423896	0.664179	0.328358	0.671642	6.04478					1.19667	1.824	5.14919	Accept	1.515	4.27688	Accept
	Chevalier et al. (2011)	Chev2011-N	Chev2011-084	T7C-69	33.45	0.94	3.03	9	32.1633	2.82302	0.0877714	0.455776	0.675725	0.351449	0.648551	5.83696					1.28667	1.824	5.14919	Accept	1.515	4.27688	Accept
	Chevalier et al. (2011)	Chev2011-N	Chev2011-085	T7C-70	28.62	0.35	2.49	9	32.1633	2.82302	0.0877714	1.25516	0.104711	0.790578	0.209422	1.8848					3.54333	1.824	5.14919	Accept	1.515	4.27688	Accept
	Chevalier et al. (2011)	Chev2011-N	Chev2011-086	T7C-71	33.32	0.87	3	9	32.1633	2.82302	0.0877714	0.409726	0.658997	0.317993	0.682007	6.13806					1.15667	1.824	5.14919	Accept	1.515	4.27688	Accept
	Chevalier et al. (2011)	Chev2011-N	Chev2011-087	T7C-72	37.78	0.75	3.34	9	32.1633	2.82302	0.0877714	1.98959	0.976682	0.953364	0.0466357	0.419721					5.61667	1.824	5.14919	Reject
	Chevalier et al. (2011)	Chev2011-O	Chev2011-088	T7C-55	13.34	0.22	1.16	8	29.0462	22.278	0.766983	0.705012	0.240401	0.519197	0.480803	3.84642	7	21.6771	8.49656	0.391959	15.7062	1.763	39.2761	Accept	1.453	32.3699	Accept				7	21.6771	8.49656	0.391959
	Chevalier et al. (2011)	Chev2011-O	Chev2011-089	T7C-56	28.95	0.55	2.55	8	29.0462	22.278	0.766983	0.00432041	0.498276	0.00344718	0.996553	7.97242					0.09625	1.763	39.2761	Accept	1.453	32.3699	Accept
	Chevalier et al. (2011)	Chev2011-O	Chev2011-090	T7C-57	17.75	0.31	1.55	8	29.0462	22.278	0.766983	0.507059	0.306057	0.387887	0.612113	4.89691					11.2962	1.763	39.2761	Accept	1.453	32.3699	Accept
	Chevalier et al. (2011)	Chev2011-O	Chev2011-091	T7C-58	16.48	0.38	1.46	8	29.0462	22.278	0.766983	0.564066	0.286355	0.427291	0.572709	4.58167					12.5662	1.763	39.2761	Accept	1.453	32.3699	Accept
	Chevalier et al. (2011)	Chev2011-O	Chev2011-092	T7C-59	37.16	0.42	3.23	8	29.0462	22.278	0.766983	0.364205	0.642148	0.284295	0.715705	5.72564					8.11375	1.763	39.2761	Accept	1.453	32.3699	Accept
	Chevalier et al. (2011)	Chev2011-O	Chev2011-093	T7C-60	16.33	0.51	1.49	8	29.0462	22.278	0.766983	0.570799	0.284068	0.431864	0.568136	4.54509					12.7162	1.763	39.2761	Accept	1.453	32.3699	Accept
	Chevalier et al. (2011)	Chev2011-O	Chev2011-094	T7C-61	21.73	0.32	1.89	8	29.0462	22.278	0.766983	0.328407	0.371302	0.257396	0.742604	5.94083					7.31625	1.763	39.2761	Accept	1.453	32.3699	Accept
	Chevalier et al. (2011)	Chev2011-O	Chev2011-095	T7C-62	80.63	0.9	7.08	8	29.0462	22.278	0.766983	2.31546	0.989706	0.979412	0.0205878	0.164703					51.5837	1.763	39.2761	Reject
Ama Drime (E Himalaya)	Chevalier et al. (2011)	Chev2011-S	Chev2011-120	T5C-127	16.31	0.4	1.45	3	29.0967	19.6396	0.674976	0.651067	0.257502	0.484997	0.515003	1.54501	3	29.0967	19.6396	0.674976	12.7867	1.196	23.4889	Accept							3	29.0967	19.6396	0.674976
	Chevalier et al. (2011)	Chev2011-S	Chev2011-122	T5C-130	51.71	1.23	4.64	3	29.0967	19.6396	0.674976	1.15142	0.87522	0.750439	0.249561	0.748682					22.6133	1.196	23.4889	Accept
	Chevalier et al. (2011)	Chev2011-S	Chev2011-124	T5C-132	19.27	0.48	1.72	3	29.0967	19.6396	0.674976	0.500351	0.308414	0.383172	0.616828	1.85048					9.82667	1.196	23.4889	Accept
Cho Oyu (E Himalaya)	Chevalier et al. (2011)	Chev2011-U	Chev2011-132	KC2-A	33.19	0.85	2.98	4	34.49	2.52683	0.0732627	0.514479	0.303459	0.393083	0.606917	2.42767	4	34.49	2.52683	0.0732627	1.3	1.383	3.49461	Accept	1.078	2.72392	Accept				3	33.2267	0.0351188	0.00105695
	Chevalier et al. (2011)	Chev2011-U	Chev2011-133	KC2-B	33.23	0.88	2.99	4	34.49	2.52683	0.0732627	0.498649	0.309013	0.381973	0.618027	2.47211					1.26	1.383	3.49461	Accept	1.078	2.72392	Accept
	Chevalier et al. (2011)	Chev2011-U	Chev2011-134	KC2-D	38.28	1.03	3.46	4	34.49	2.52683	0.0732627	1.4999	0.93318	0.866361	0.133639	0.534558					3.79	1.383	3.49461	Reject
	Chevalier et al. (2011)	Chev2011-U	Chev2011-135	KC2-E	33.26	0.87	2.99	4	34.49	2.52683	0.0732627	0.486776	0.313209	0.373583	0.626417	2.50567					1.23	1.383	3.49461	Accept	1.078	2.72392	Accept
Gurla Mandhata (W Himalaya)	Chevalier et al. (2011)	Chev2011-W	Chev2011-154	KC2-45	59.14	1.48	5.33	4	41.9425	16.2705	0.387925	1.05697	0.854738	0.709476	0.290524	1.1621	4	41.9425	16.2705	0.387925	17.1975	1.383	22.5022	Accept							4	41.9425	16.2705	0.387925
	Chevalier et al. (2011)	Chev2011-W	Chev2011-155	KC2-46	50.92	1.9	4.8	4	41.9425	16.2705	0.387925	0.551764	0.709445	0.41889	0.58111	2.32444					8.9775	1.383	22.5022	Accept
	Chevalier et al. (2011)	Chev2011-W	Chev2011-156	KC2-47	22.72	0.58	2.04	4	41.9425	16.2705	0.387925	1.18143	0.118716	0.762568	0.237432	0.949728					19.2225	1.383	22.5022	Accept
	Chevalier et al. (2011)	Chev2011-W	Chev2011-159	KC2-50	34.99	0.88	3.14	#REF!	41.9425	16.2705	#REF!	0.427306	0.334578	0.330844	0.669156	#REF!					6.9525	#REF!	#REF!	#REF!
Kailas (C Himalaya)	Chevalier et al. (2011)	Chev2011-X	Chev2011-169	KC2-66	14.81	0.66	1.43	8	17.4425	1.85177	0.106164	1.42161	0.0775693	0.844861	0.155139	1.24111	8	17.4425	1.85177	0.106164	2.6325	1.763	3.26467	Accept							8	17.4425	1.85177	0.106164
	Chevalier et al. (2011)	Chev2011-X	Chev2011-170	KC2-67	19.32	0.8	1.84	8	17.4425	1.85177	0.106164	1.0139	0.844684	0.689367	0.310633	2.48506					1.8775	1.763	3.26467	Accept
	Chevalier et al. (2011)	Chev2011-X	Chev2011-171	KC2-69	19.15	0.55	1.73	8	17.4425	1.85177	0.106164	0.922091	0.821759	0.643519	0.356481	2.85185					1.7075	1.763	3.26467	Accept
	Chevalier et al. (2011)	Chev2011-X	Chev2011-172	KC2-70	16.07	0.41	1.44	8	17.4425	1.85177	0.106164	0.741183	0.229291	0.541418	0.458582	3.66866					1.3725	1.763	3.26467	Accept
	Chevalier et al. (2011)	Chev2011-X	Chev2011-173	KC2-71	15.33	0.43	1.38	8	17.4425	1.85177	0.106164	1.1408	0.126976	0.746047	0.253953	2.03162					2.1125	1.763	3.26467	Accept
	Chevalier et al. (2011)	Chev2011-X	Chev2011-174	KC2-72	18.87	0.56	1.71	8	17.4425	1.85177	0.106164	0.770884	0.779612	0.559224	0.440776	3.5262					1.4275	1.763	3.26467	Accept
	Chevalier et al. (2011)	Chev2011-X	Chev2011-175	KC2-73	18.9	0.4	1.67	8	17.4425	1.85177	0.106164	0.787085	0.784384	0.568768	0.431232	3.44986					1.4575	1.763	3.26467	Accept
	Chevalier et al. (2011)	Chev2011-X	Chev2011-176	KC2-74	17.09	0.53	1.56	8	17.4425	1.85177	0.106164	0.190358	0.424514	0.150972	0.849028	6.79223					0.3525	1.763	3.26467	Accept
	Chevalier et al. (2011)	Chev2011-Y	Chev2011-177	Zi-85	49.69	0.86	4.38	14	44.5993	12.9219	0.289734	0.393959	0.653194	0.306389	0.693611	9.71056	14	44.5993	12.9219	0.289734	5.09071	2.043	26.3995	Accept							14	44.5993	12.9219	0.289734
	Chevalier et al. (2011)	Chev2011-Y	Chev2011-178	Zi-86	47.15	0.82	4.16	14	44.5993	12.9219	0.289734	0.197394	0.57824	0.156481	0.843519	11.8093					2.55071	2.043	26.3995	Accept
	Chevalier et al. (2011)	Chev2011-Y	Chev2011-179	Zi-87	43.13	1.37	3.97	14	44.5993	12.9219	0.289734	0.113705	0.454736	0.0905281	0.909472	12.7326					1.46929	2.043	26.3995	Accept
	Chevalier et al. (2011)	Chev2011-Y	Chev2011-180	Zi-88	63.06	1.1	5.58	14	44.5993	12.9219	0.289734	1.42863	0.923445	0.84689	0.15311	2.14354					18.4607	2.043	26.3995	Accept
	Chevalier et al. (2011)	Chev2011-Y	Chev2011-181	Zi-89	48.8	1.04	4.34	14	44.5993	12.9219	0.289734	0.325084	0.627441	0.254882	0.745118	10.4316					4.20071	2.043	26.3995	Accept
	Chevalier et al. (2011)	Chev2011-Y	Chev2011-182	Zi-90	41.57	1.44	3.86	14	44.5993	12.9219	0.289734	0.23443	0.407326	0.185349	0.814651	11.4051					3.02929	2.043	26.3995	Accept
	Chevalier et al. (2011)	Chev2011-Y	Chev2011-183	Zi91	47.9	1.05	4.27	14	44.5993	12.9219	0.289734	0.255435	0.600806	0.201613	0.798387	11.1774					3.30071	2.043	26.3995	Accept
	Chevalier et al. (2011)	Chev2011-Y	Chev2011-184	Zi-92	44.7	1.94	4.32	14	44.5993	12.9219	0.289734	0.00779405	0.503109	0.00621869	0.993781	13.9129					0.100714	2.043	26.3995	Accept
	Chevalier et al. (2011)	Chev2011-Y	Chev2011-185	Zi-93	24.88	0.52	2.2	14	44.5993	12.9219	0.289734	1.52603	0.063501	0.872998	0.127002	1.77803					19.7193	2.043	26.3995	Accept
	Chevalier et al. (2011)	Chev2011-Y	Chev2011-186	Zi-94	52.62	2.62	5.25	14	44.5993	12.9219	0.289734	0.620705	0.732603	0.465206	0.534794	7.48711					8.02071	2.043	26.3995	Accept
	Chevalier et al. (2011)	Chev2011-Y	Chev2011-187	Zi95	59.26	1.09	5.25	14	44.5993	12.9219	0.289734	1.13456	0.87172	0.74344	0.25656	3.59184					14.6607	2.043	26.3995	Accept
	Chevalier et al. (2011)	Chev2011-Y	Chev2011-188	Zi-96	55.8	2.86	5.61	14	44.5993	12.9219	0.289734	0.866798	0.806974	0.613947	0.386053	5.40474					11.2007	2.043	26.3995	Accept
	Chevalier et al. (2011)	Chev2011-Y	Chev2011-189	Zi-98	26.35	1.27	2.6	14	44.5993	12.9219	0.289734	1.41227	0.0789351	0.84213	0.15787	2.21018					18.2493	2.043	26.3995	Accept
	Chevalier et al. (2011)	Chev2011-Y	Chev2011-190	Zi-99	19.48	0.45	1.73	14	44.5993	12.9219	0.289734	1.94393	0.0259522	0.948096	0.0519045	0.726663					25.1193	2.043	26.3995	Accept
	Chevalier et al. (2011)	Chev2011-Z	Chev2011-191	KC2-75	37.95	0.85	3.38	7	68.3886	91.1564	1.33292	0.333916	0.369222	0.261557	0.738443	5.1691	6	34.0533	8.27989	0.243145	30.4386	1.693	154.328	Accept	1.382	125.978	Accept				6	34.0533	8.27989	0.243145
	Chevalier et al. (2011)	Chev2011-Z	Chev2011-192	KC2-76	46.07	0.81	4.06	7	68.3886	91.1564	1.33292	0.244838	0.403291	0.193418	0.806582	5.64607					22.3186	1.693	154.328	Accept	1.382	125.978	Accept
	Chevalier et al. (2011)	Chev2011-Z	Chev2011-193	KC2-77	26.15	0.74	2.37	7	68.3886	91.1564	1.33292	0.463364	0.321552	0.356896	0.643104	4.50173					42.2386	1.693	154.328	Accept	1.382	125.978	Accept
	Chevalier et al. (2011)	Chev2011-Z	Chev2011-194	KC2-78	274.4	3.43	25.34	7	68.3886	91.1564	1.33292	2.25998	0.988089	0.976177	0.0238226	0.166759					206.011	1.693	154.328	Reject
	Chevalier et al. (2011)	Chev2011-Z	Chev2011-195	KC2-80	39.23	0.7	3.45	7	68.3886	91.1564	1.33292	0.319874	0.374532	0.250936	0.749064	5.24345					29.1586	1.693	154.328	Accept	1.382	125.978	Accept
	Chevalier et al. (2011)	Chev2011-Z	Chev2011-196	KC2-82	29.33	0.72	2.62	7	68.3886	91.1564	1.33292	0.428479	0.334151	0.331697	0.668303	4.67812					39.0586	1.693	154.328	Accept	1.382	125.978	Accept
	Chevalier et al. (2011)	Chev2011-Z	Chev2011-197	KC2-83	25.59	0.92	2.38	7	68.3886	91.1564	1.33292	0.469507	0.319354	0.361293	0.638707	4.47095					42.7986	1.693	154.328	Accept	1.382	125.978	Accept
Nyainqentanghla (Inner Tibet)	Dong et al. (2017a)	Dong2017a-A	Dong2017a-001	NQDGL15-01	20.95	1.39	2.27	5	16.078	8.00915	0.498143	0.608304	0.728507	0.457014	0.542986	2.71493	4	19.63	1.19049	0.0606465	4.872	1.509	12.0858	Accept	1.2	9.61098	Accept				4	19.63	1.19049	0.0606465
	Dong et al. (2017a)	Dong2017a-A	Dong2017a-002	NQDGL15-02	1.87	0.2	0.26	5	16.078	8.00915	0.498143	1.77397	0.038034	0.923932	0.0760679	0.38034					14.208	1.509	12.0858	Reject
	Dong et al. (2017a)	Dong2017a-A	Dong2017a-003	NQDGL15-05	19.4	1.35	2.14	5	16.078	8.00915	0.498143	0.414776	0.660847	0.321694	0.678306	3.39153					3.322	1.509	12.0858	Accept	1.2	9.61098	Accept
	Dong et al. (2017a)	Dong2017a-A	Dong2017a-004	NQDGL15-06	18.12	0.98	1.84	5	16.078	8.00915	0.498143	0.254958	0.600622	0.201245	0.798755	3.99378					2.042	1.509	12.0858	Accept	1.2	9.61098	Accept
	Dong et al. (2017a)	Dong2017a-A	Dong2017a-005	NQDGL15-07	20.05	1.4	2.22	5	16.078	8.00915	0.498143	0.495933	0.690029	0.380058	0.619942	3.09971					3.972	1.509	12.0858	Accept	1.2	9.61098	Accept
	Dong et al. (2017a)	Dong2017a-B	Dong2017a-006	NQDGL15-08	19.07	0.86	1.85	5	20.308	0.849718	0.0418415	1.45695	0.0725645	0.854871	0.145129	0.725645	5	20.308	0.849718	0.0418415	1.238	1.509	1.28222	Accept							5	20.308	0.849718	0.0418415
	Dong et al. (2017a)	Dong2017a-B	Dong2017a-007	NQDGL15-09	19.93	1.07	2.02	5	20.308	0.849718	0.0418415	0.444854	0.328213	0.343575	0.656425	3.28213					0.378	1.509	1.28222	Accept
	Dong et al. (2017a)	Dong2017a-B	Dong2017a-008	NQDGL15-10	21.11	0.75	1.96	5	20.308	0.849718	0.0418415	0.943843	0.827375	0.65475	0.34525	1.72625					0.802	1.509	1.28222	Accept
	Dong et al. (2017a)	Dong2017a-B	Dong2017a-009	NQDGL15-11	21.06	0.95	2.04	5	20.308	0.849718	0.0418415	0.885	0.811922	0.623843	0.376157	1.88078					0.752	1.509	1.28222	Accept
	Dong et al. (2017a)	Dong2017a-B	Dong2017a-010	NQDGL15-12	20.37	0.84	1.94	5	20.308	0.849718	0.0418415	0.0729654	0.529083	0.0581664	0.941834	4.70917					0.062	1.509	1.28222	Accept
Xainza (Inner Tibet)	Dong et al. (2017b)	Dong2017b-A	Dong2017b-001	14XZ1-1	0.53	0.12	0.13	4	0.3225	0.142215	0.440976	1.45906	0.927726	0.855452	0.144548	0.578192	4	0.3225	0.142215	0.440976	0.2075	1.383	0.196683	Reject							3	0.253333	0.0404145	0.159531
	Dong et al. (2017b)	Dong2017b-A	Dong2017b-002	14XZ1-3	0.26	0.07	0.07	4	0.3225	0.142215	0.440976	0.439477	0.330158	0.339684	0.660316	2.64126					0.0625	1.383	0.196683	Accept	1.078	0.153307	Accept
	Dong et al. (2017b)	Dong2017b-A	Dong2017b-003	14XZ1-4	0.21	0.05	0.06	4	0.3225	0.142215	0.440976	0.791058	0.214455	0.57109	0.42891	1.71564					0.1125	1.383	0.196683	Accept	1.078	0.153307	Accept
	Dong et al. (2017b)	Dong2017b-A	Dong2017b-004	14XZ1-5	0.29	0.07	0.07	4	0.3225	0.142215	0.440976	0.228528	0.409618	0.180764	0.819236	3.27694					0.0325	1.383	0.196683	Accept	1.078	0.153307	Accept
Jarai (Darhad)	Gillespie et al. (2008)	Gill2008-D	Gill2008-007	arg-Gar-Ia-001	23.37	0.56	2.08	7	27.9643	11.3183	0.40474	0.405918	0.342402	0.315197	0.684803	4.79362	7	27.9643	11.3183	0.40474	4.59429	1.693	19.1618	Accept							7	27.9643	11.3183	0.40474
	Gillespie et al. (2008)	Gill2008-D	Gill2008-008	arg-Gar-Ia-002	20.8	0.51	1.86	7	27.9643	11.3183	0.40474	0.632984	0.263372	0.473256	0.526744	3.68721					7.16429	1.693	19.1618	Accept
	Gillespie et al. (2008)	Gill2008-D	Gill2008-009	arg-Gar-Ia-003	23.72	0.45	2.09	7	27.9643	11.3183	0.40474	0.374994	0.353832	0.292335	0.707665	4.95365					4.24429	1.693	19.1618	Accept
	Gillespie et al. (2008)	Gill2008-D	Gill2008-010	arg-Gar-Ia-010	44.71	0.79	3.94	7	27.9643	11.3183	0.40474	1.47953	0.930501	0.861001	0.138999	0.972992					16.7457	1.693	19.1618	Accept
	Gillespie et al. (2008)	Gill2008-D	Gill2008-011	arg-Gar-Ia-011	43.99	2.92	4.79	7	27.9643	11.3183	0.40474	1.41592	0.9216	0.8432	0.1568	1.0976					16.0257	1.693	19.1618	Accept
	Gillespie et al. (2008)	Gill2008-D	Gill2008-012	arg-Gar-Ia-012	19.17	0.39	1.69	7	27.9643	11.3183	0.40474	0.776999	0.21858	0.562841	0.437159	3.06012					8.79429	1.693	19.1618	Accept
	Gillespie et al. (2008)	Gill2008-D	Gill2008-013	arg-Gar-Ia-013	19.99	0.51	1.79	7	27.9643	11.3183	0.40474	0.70455	0.240545	0.51891	0.48109	3.36763					7.97429	1.693	19.1618	Accept
	Gillespie et al. (2008)	Gill2008-E	Gill2008-014	arg-Gar-IIa-005	29.93	0.75	2.68	3	23.09	6.08451	0.263513	1.12417	0.869529	0.739057	0.260943	0.782828	3	23.09	6.08451	0.263513	6.84	1.196	7.27708	Accept							3	23.09	6.08451	0.263513
	Gillespie et al. (2008)	Gill2008-E	Gill2008-015	arg-Gar-IIa-007	18.28	0.44	1.63	3	23.09	6.08451	0.263513	0.790532	0.214609	0.570783	0.429217	1.28765					4.81	1.196	7.27708	Accept
	Gillespie et al. (2008)	Gill2008-E	Gill2008-016	arg-Gar-IIa-008	21.06	0.38	1.85	3	23.09	6.08451	0.263513	0.333634	0.369328	0.261344	0.738656	2.21597					2.03	1.196	7.27708	Accept
Hogyin (Darhad)	Gillespie et al. (2008)	Gill2008-F	Gill2008-017	arg-Huj-01a	242.77	11.19	24.71	3	164.417	69.5288	0.422882	1.12692	0.870112	0.740223	0.259777	0.779331	3	164.417	69.5288	0.422882	78.3533	1.196	83.1565	Accept							3	164.417	69.5288	0.422882
	Gillespie et al. (2008)	Gill2008-F	Gill2008-018	arg-Huj-01b	110.08	1.98	9.86	3	164.417	69.5288	0.422882	0.781498	0.217255	0.565491	0.434509	1.30353					54.3367	1.196	83.1565	Accept
	Gillespie et al. (2008)	Gill2008-F	Gill2008-019	arg-Huj-01c	140.4	2.53	12.67	3	164.417	69.5288	0.422882	0.34542	0.364889	0.270222	0.729778	2.18934					24.0167	1.196	83.1565	Accept
	Gillespie et al. (2008)	Gill2008-G	Gill2008-020	arg-Huj-02a	16.22	0.54	1.49	3	29.84	14.2523	0.477624	0.955635	0.169628	0.660743	0.339257	1.01777	3	29.84	14.2523	0.477624	13.62	1.196	17.0458	Accept							3	29.84	14.2523	0.477624
	Gillespie et al. (2008)	Gill2008-G	Gill2008-021	arg-Huj-02b	44.65	1.1	4.01	3	29.84	14.2523	0.477624	1.03913	0.850628	0.701256	0.298744	0.896233					14.81	1.196	17.0458	Accept
	Gillespie et al. (2008)	Gill2008-G	Gill2008-022	arg-Huj-02c	28.65	0.9	2.62	3	29.84	14.2523	0.477624	0.0834952	0.466729	0.0665422	0.933458	2.80037					1.19	1.196	17.0458	Accept
Bayan Har Shan (Inner Tibet)	Heyman et al. (2011)	Heym2011-C	Heym2011-004	TB-05-048	15.01	0.84	1.54	3	16.2	4.21299	0.260061	0.28246	0.388796	0.222409	0.777591	2.33277	3	16.2	4.21299	0.260061	1.19	1.196	5.03874	Accept							3	16.2	4.21299	0.260061
	Heyman et al. (2011)	Heym2011-C	Heym2011-005	TB-05-049	12.71	0.37	1.15	3	16.2	4.21299	0.260061	0.82839	0.203725	0.59255	0.40745	1.22235					3.49	1.196	5.03874	Accept
	Heyman et al. (2011)	Heym2011-C	Heym2011-006	TB-05-050	20.88	0.84	1.98	3	16.2	4.21299	0.260061	1.11085	0.866683	0.733367	0.266633	0.799899					4.68	1.196	5.03874	Accept
	Heyman et al. (2011)	Heym2011-D	Heym2011-008	TB-06-01	59.61	2.19	5.61	4	62.4325	15.374	0.24625	0.183589	0.427168	0.145664	0.854336	3.41734	4	62.4325	15.374	0.24625	2.8225	1.383	21.2623	Accept							4	62.4325	15.374	0.24625
	Heyman et al. (2011)	Heym2011-D	Heym2011-009	TB-06-02	74.86	2.07	6.83	4	62.4325	15.374	0.24625	0.808344	0.790554	0.581107	0.418893	1.67557					12.4275	1.383	21.2623	Accept
	Heyman et al. (2011)	Heym2011-D	Heym2011-010	TB-06-37	41.81	1.75	4.01	4	62.4325	15.374	0.24625	1.34139	0.0898976	0.820205	0.179795	0.719181					20.6225	1.383	21.2623	Accept
	Heyman et al. (2011)	Heym2011-D	Heym2011-011	TB-07-125	73.45	2.67	6.92	4	62.4325	15.374	0.24625	0.716631	0.763199	0.526398	0.473602	1.89441					11.0175	1.383	21.2623	Accept
	Heyman et al. (2011)	Heym2011-G	Heym2011-019	TB-06-46	52.41	1.21	4.69	3	71.34	24.9552	0.349807	0.758559	0.224058	0.551883	0.448117	1.34435	3	71.34	24.9552	0.349807	18.93	1.196	29.8464	Accept							3	71.34	24.9552	0.349807
	Heyman et al. (2011)	Heym2011-G	Heym2011-020	TB-06-47	61.99	1.67	5.63	3	71.34	24.9552	0.349807	0.374671	0.353953	0.292095	0.707905	2.12372					9.35	1.196	29.8464	Accept
	Heyman et al. (2011)	Heym2011-G	Heym2011-021	TB-06-48	99.62	2.96	9.21	3	71.34	24.9552	0.349807	1.13323	0.871441	0.742882	0.257118	0.771353					28.28	1.196	29.8464	Accept
	Heyman et al. (2011)	Heym2011-H	Heym2011-022	TB-06-31	57.42	1.15	5.1	3	65.98	48.4307	0.734021	0.176747	0.429853	0.140293	0.859707	2.57912	3	65.98	48.4307	0.734021	8.56	1.196	57.9231	Accept							3	65.98	48.4307	0.734021
	Heyman et al. (2011)	Heym2011-H	Heym2011-023	TB-06-32	118.12	4.01	11.13	3	65.98	48.4307	0.734021	1.07659	0.859168	0.718336	0.281664	0.844991					52.14	1.196	57.9231	Accept
	Heyman et al. (2011)	Heym2011-H	Heym2011-024	TB-06-33	22.4	0.98	2.16	3	65.98	48.4307	0.734021	0.899842	0.184102	0.631796	0.368204	1.10461					43.58	1.196	57.9231	Accept
	Heyman et al. (2011)	Heym2011-I	Heym2011-025	TB-06-25	71.14	3.4	7.06	3	56.6	25.4877	0.450313	0.570471	0.715821	0.431641	0.568359	1.70508	3	56.6	25.4877	0.450313	14.54	1.196	30.4833	Accept							3	56.6	25.4877	0.450313
	Heyman et al. (2011)	Heym2011-I	Heym2011-026	TB-06-26	27.17	1.42	2.73	3	56.6	25.4877	0.450313	1.15467	0.124112	0.751776	0.248224	0.744673					29.43	1.196	30.4833	Accept
	Heyman et al. (2011)	Heym2011-I	Heym2011-027	TB-06-27	71.49	4.07	7.43	3	56.6	25.4877	0.450313	0.584203	0.720458	0.440916	0.559084	1.67725					14.89	1.196	30.4833	Accept
	Heyman et al. (2011)	Heym2011-J	Heym2011-029	TB-07-31	54.79	1.18	4.89	3	38.8967	23.3161	0.599437	0.681646	0.752269	0.504537	0.495463	1.48639	3	38.8967	23.3161	0.599437	15.8933	1.196	27.8861	Accept							3	38.8967	23.3161	0.599437
	Heyman et al. (2011)	Heym2011-J	Heym2011-030	TB-07-33	49.77	1.04	4.43	3	38.8967	23.3161	0.599437	0.466344	0.679515	0.359031	0.640969	1.92291					10.8733	1.196	27.8861	Accept
	Heyman et al. (2011)	Heym2011-J	Heym2011-031	TB-07-34	12.13	0.63	1.21	3	38.8967	23.3161	0.599437	1.14799	0.125486	0.749027	0.250973	0.752918					26.7667	1.196	27.8861	Accept
	Heyman et al. (2011)	Heym2011-L	Heym2011-036	TB-07-22	54.98	1.04	4.87	3	34.0067	18.1773	0.534522	1.15382	0.875713	0.751426	0.248574	0.745723	3	34.0067	18.1773	0.534522	20.9733	1.196	21.7401	Accept							3	34.0067	18.1773	0.534522
	Heyman et al. (2011)	Heym2011-L	Heym2011-037	TB-07-23	22.81	0.86	2.14	3	34.0067	18.1773	0.534522	0.615969	0.268957	0.462085	0.537915	1.61374					11.1967	1.196	21.7401	Accept
	Heyman et al. (2011)	Heym2011-L	Heym2011-038	TB-07-24	24.23	0.83	2.24	3	34.0067	18.1773	0.534522	0.53785	0.29534	0.409319	0.590681	1.77204					9.77667	1.196	21.7401	Accept
	Heyman et al. (2011)	Heym2011-M	Heym2011-040	TB-07-38	16.04	0.63	1.51	3	108.223	80.8519	0.747084	1.14015	0.127112	0.745776	0.254224	0.762672	3	108.223	80.8519	0.747084	92.1833	1.196	96.6989	Accept							3	108.223	80.8519	0.747084
	Heyman et al. (2011)	Heym2011-M	Heym2011-041	TB-07-39	141.52	3.76	13.07	3	108.223	80.8519	0.747084	0.411823	0.659765	0.319531	0.680469	2.04141					33.2967	1.196	96.6989	Accept
	Heyman et al. (2011)	Heym2011-M	Heym2011-042	TB-07-40	167.11	4.49	15.54	3	108.223	80.8519	0.747084	0.728327	0.766793	0.533587	0.466413	1.39924					58.8867	1.196	96.6989	Accept
	Heyman et al. (2011)	Heym2011-N	Heym2011-044	TB-07-92	65.28	0.94	5.74	3	60.28	4.52395	0.0750489	1.10523	0.86547	0.73094	0.26906	0.807181	3	60.28	4.52395	0.0750489	5	1.196	5.41064	Accept							3	60.28	4.52395	0.0750489
	Heyman et al. (2011)	Heym2011-N	Heym2011-045	TB-07-93	56.47	1.15	5.02	3	60.28	4.52395	0.0750489	0.842185	0.199842	0.600316	0.399684	1.19905					3.81	1.196	5.41064	Accept
	Heyman et al. (2011)	Heym2011-N	Heym2011-046	TB-07-94	59.09	0.98	5.21	3	60.28	4.52395	0.0750489	0.263045	0.396258	0.207484	0.792516	2.37755					1.19	1.196	5.41064	Accept
	Heyman et al. (2011)	Heym2011-O	Heym2011-048	TB-07-117	39	0.78	3.45	3	47.56	23.4714	0.493512	0.364699	0.357668	0.284664	0.715336	2.14601	3	47.56	23.4714	0.493512	8.56	1.196	28.0718	Accept							3	47.56	23.4714	0.493512
	Heyman et al. (2011)	Heym2011-O	Heym2011-049	TB-07-118	29.57	0.54	2.6	3	47.56	23.4714	0.493512	0.766464	0.2217	0.5566	0.4434	1.3302					17.99	1.196	28.0718	Accept
	Heyman et al. (2011)	Heym2011-O	Heym2011-050	TB-07-119	74.11	1.39	6.59	3	47.56	23.4714	0.493512	1.13116	0.871007	0.742013	0.257987	0.77396					26.55	1.196	28.0718	Accept
Baikal	Horiuchi et al. (2004)	Hori2004-A	Hori2004-001	SB-1	15.95	3.38	3.64	3	15.08	0.762168	0.0505416	1.14148	0.873165	0.74633	0.25367	0.76101	3	15.08	0.762168	0.0505416	0.87	1.196	0.911553	Accept							3	15.08	0.762168	0.0505416
	Horiuchi et al. (2004)	Hori2004-A	Hori2004-002	SB-2	14.76	1.15	1.71	3	15.08	0.762168	0.0505416	0.419855	0.337296	0.325409	0.674591	2.02377					0.32	1.196	0.911553	Accept
	Horiuchi et al. (2004)	Hori2004-A	Hori2004-003	SB-3	14.53	1.3	1.8	3	15.08	0.762168	0.0505416	0.721626	0.235262	0.529475	0.470525	1.41157					0.55	1.196	0.911553	Accept
Ala Bash (W Tian Shan)	Koppes et al. (2008)	Kopp2008-J	Kopp2008-014	KTS98-CS-90	129.95	5.92	12.9	3	118.513	42.5926	0.359391	0.268513	0.605848	0.211696	0.788304	2.36491	3	118.513	42.5926	0.359391	11.4367	1.196	50.9407	Accept							3	118.513	42.5926	0.359391
	Koppes et al. (2008)	Kopp2008-J	Kopp2008-015	KTS98-CS-91	154.22	3.74	14.19	3	118.513	42.5926	0.359391	0.838331	0.799077	0.598155	0.401845	1.20554					35.7067	1.196	50.9407	Accept
	Koppes et al. (2008)	Kopp2008-J	Kopp2008-016	KTS98-CS-92	71.37	1.75	6.45	3	118.513	42.5926	0.359391	1.10684	0.134181	0.731638	0.268362	0.805085					47.1433	1.196	50.9407	Accept
	Koppes et al. (2008)	Kopp2008-K	Kopp2008-017	KTS98-CS-93	97.25	2.69	8.92	4	102.848	25.0468	0.243534	0.223482	0.41158	0.176839	0.823161	3.29264	4	102.848	25.0468	0.243534	5.5975	1.383	34.6397	Accept							4	102.848	25.0468	0.243534
	Koppes et al. (2008)	Kopp2008-K	Kopp2008-018	KTS98-CS-94	106.98	3.1	9.88	4	102.848	25.0468	0.243534	0.164991	0.565524	0.131049	0.868951	3.4758					4.1325	1.383	34.6397	Accept
	Koppes et al. (2008)	Kopp2008-K	Kopp2008-019	KTS98-CS-95	133.85	2.69	12.12	4	102.848	25.0468	0.243534	1.23778	0.892102	0.784203	0.215797	0.863187					31.0025	1.383	34.6397	Accept
	Koppes et al. (2008)	Kopp2008-K	Kopp2008-020	KTS98-CS-96	73.31	1.78	6.62	4	102.848	25.0468	0.243534	1.17929	0.119141	0.761718	0.238282	0.953128					29.5375	1.383	34.6397	Accept
Borohoro (E Tian Shan)	Li et al. (2016)	Li2016-B	Li2016-006	HDB-12-11	0.2	0.03	0.04	3	2.11333	3.15939	1.49498	0.605602	0.272389	0.455221	0.544779	1.63434	3	2.11333	3.15939	1.49498	1.91333	1.196	3.77863	Accept							3	2.11333	3.15939	1.49498
	Li et al. (2016)	Li2016-B	Li2016-007	HDB-12-12	0.38	0.04	0.05	3	2.11333	3.15939	1.49498	0.548629	0.29163	0.41674	0.58326	1.74978					1.73333	1.196	3.77863	Accept
	Li et al. (2016)	Li2016-B	Li2016-010	HDB-12-15	5.76	0.15	0.51	3	2.11333	3.15939	1.49498	1.15423	0.875797	0.751595	0.248405	0.745215					3.64667	1.196	3.77863	Accept
Kalurong (Inner Tibet)	Liu et al. (2017)	Liu2017-B	Liu2017-004	TB-14-19	2.38	0.09	0.22	4	10.6675	9.92071	0.929994	0.835374	0.201754	0.596493	0.403507	1.61403	4	10.6675	9.92071	0.929994	8.2875	1.383	13.7203	Accept							4	10.6675	9.92071	0.929994
	Liu et al. (2017)	Liu2017-B	Liu2017-005	TB-14-20	2.26	0.1	0.22	4	10.6675	9.92071	0.929994	0.84747	0.198367	0.603267	0.396733	1.58693					8.4075	1.383	13.7203	Accept
	Liu et al. (2017)	Liu2017-B	Liu2017-006	TB-14-21	16.14	0.43	1.45	4	10.6675	9.92071	0.929994	0.551624	0.709397	0.418794	0.581206	2.32482					5.4725	1.383	13.7203	Accept
	Liu et al. (2017)	Liu2017-B	Liu2017-007	TB-14-22	21.89	0.66	1.99	4	10.6675	9.92071	0.929994	1.13122	0.871019	0.742037	0.257963	1.03185					11.2225	1.383	13.7203	Accept
	Liu et al. (2017)	Liu2017-C	Liu2017-008	TB-14-33	8.04	0.31	0.76	3	17.07	7.84595	0.459634	1.15091	0.124884	0.750232	0.249768	0.749305	3	17.07	7.84595	0.459634	9.03	1.196	9.38375	Accept							3	17.07	7.84595	0.459634
	Liu et al. (2017)	Liu2017-C	Liu2017-009	TB-14-34	22.22	0.77	2.06	3	17.07	7.84595	0.459634	0.65639	0.744213	0.488427	0.511573	1.53472					5.15	1.196	9.38375	Accept
	Liu et al. (2017)	Liu2017-C	Liu2017-010	TB-14-36	20.95	0.53	1.87	3	17.07	7.84595	0.459634	0.494523	0.689531	0.379063	0.620937	1.86281					3.88	1.196	9.38375	Accept
	Liu et al. (2017)	Liu2017-D	Liu2017-011	TB-14-39	6.54	0.61	0.83	3	13.3033	5.91092	0.444319	1.14421	0.126268	0.747463	0.252537	0.757611	3	13.3033	5.91092	0.444319	6.76333	1.196	7.06947	Accept							3	13.3033	5.91092	0.444319
	Liu et al. (2017)	Liu2017-D	Liu2017-012	TB-14-41	17.48	0.32	1.53	3	13.3033	5.91092	0.444319	0.706601	0.760093	0.520186	0.479814	1.43944					4.17667	1.196	7.06947	Accept
	Liu et al. (2017)	Liu2017-D	Liu2017-013	TB-14-42	15.89	0.49	1.45	3	13.3033	5.91092	0.444319	0.437608	0.669165	0.338329	0.661671	1.98501					2.58667	1.196	7.06947	Accept
Karola (Inner Tibet)	Liu et al. (2017)	Liu2017-E	Liu2017-014	KRLE-14-14	16.07	0.39	1.43	4	5.49	7.52457	1.3706	1.40606	0.920147	0.840294	0.159706	0.638825	4	5.49	7.52457	1.3706	10.58	1.383	10.4065	Reject							3	1.96333	3.21007	1.63501
	Liu et al. (2017)	Liu2017-E	Liu2017-015	KRLE-14-15	5.67	0.13	0.5	4	5.49	7.52457	1.3706	0.0239216	0.509542	0.0190849	0.980915	3.92366					0.18	1.383	10.4065	Accept	1.078	8.11149	Accept
	Liu et al. (2017)	Liu2017-E	Liu2017-016	KRLE-14-19	0.11	0.05	0.05	4	5.49	7.52457	1.3706	0.714991	0.237307	0.525385	0.474615	1.89846					5.38	1.383	10.4065	Accept	1.078	8.11149	Accept
	Liu et al. (2017)	Liu2017-E	Liu2017-017	KRLE-14-25	0.11	0.01	0.02	4	5.49	7.52457	1.3706	0.714991	0.237307	0.525385	0.474615	1.89846					5.38	1.383	10.4065	Accept	1.078	8.11149	Accept
	Liu et al. (2017)	Liu2017-F	Liu2017-018	KRLE-14-43	0.2	0.01	0.02	4	0.235	0.0619139	0.263463	0.565301	0.285935	0.428131	0.571869	2.28748	4	0.235	0.0619139	0.263463	0.035	1.383	0.0856269	Accept							4	0.235	0.0619139	0.263463
	Liu et al. (2017)	Liu2017-F	Liu2017-019	KRLE-14-44	0.24	0.02	0.03	4	0.235	0.0619139	0.263463	0.0807573	0.532183	0.064365	0.935635	3.74254					0.005	1.383	0.0856269	Accept
	Liu et al. (2017)	Liu2017-F	Liu2017-020	KRLE-14-45	0.18	0.01	0.02	4	0.235	0.0619139	0.263463	0.88833	0.187182	0.625637	0.374363	1.49745					0.055	1.383	0.0856269	Accept
	Liu et al. (2017)	Liu2017-F	Liu2017-021	KRLE-14-46	0.32	0.08	0.08	4	0.235	0.0619139	0.263463	1.37287	0.915104	0.830208	0.169792	0.679166					0.085	1.383	0.0856269	Accept
Tanggula Shan (Inner Tibet)	Owen et al. (2005)	Owen2005-L	Owen2005-039	PR62	58.53	1.53	5.3	4	61.2225	7.74968	0.126582	0.347434	0.364133	0.271735	0.728265	2.91306	4	61.2225	7.74968	0.126582	2.6925	1.383	10.7178	Accept	1.078	8.35415	Accept				3	57.5167	2.77255	0.0482043
	Owen et al. (2005)	Owen2005-L	Owen2005-040	PR63	59.64	0.9	5.25	4	61.2225	7.74968	0.126582	0.204202	0.419098	0.161804	0.838196	3.35278					1.5825	1.383	10.7178	Accept	1.078	8.35415	Accept
	Owen et al. (2005)	Owen2005-L	Owen2005-041	PR64	54.38	1.75	5.02	4	61.2225	7.74968	0.126582	0.88294	0.188634	0.622731	0.377269	1.50907					6.8425	1.383	10.7178	Accept	1.078	8.35415	Accept
	Owen et al. (2005)	Owen2005-L	Owen2005-042	PR65	72.34	0.99	6.37	4	61.2225	7.74968	0.126582	1.43458	0.924296	0.848592	0.151408	0.605632					11.1175	1.383	10.7178	Reject
	Owen et al. (2005)	Owen2005-M	Owen2005-043	PR66	135.99	4.03	12.67	5	98.924	47.9848	0.485067	0.772454	0.780077	0.560154	0.439846	2.19923	5	98.924	47.9848	0.485067	37.066	1.509	72.409	Accept							5	98.924	47.9848	0.485067
	Owen et al. (2005)	Owen2005-M	Owen2005-044	PR67	139.34	4.38	13.07	5	98.924	47.9848	0.485067	0.842268	0.800181	0.600362	0.399638	1.99819					40.416	1.509	72.409	Accept
	Owen et al. (2005)	Owen2005-M	Owen2005-045	PR68	125.13	4.13	11.77	5	98.924	47.9848	0.485067	0.546132	0.707512	0.415025	0.584975	2.92488					26.206	1.509	72.409	Accept
	Owen et al. (2005)	Owen2005-M	Owen2005-046	PR69	38.7	1.48	3.65	5	98.924	47.9848	0.485067	1.25507	0.104728	0.790545	0.209455	1.04728					60.224	1.509	72.409	Accept
	Owen et al. (2005)	Owen2005-M	Owen2005-047	PR70	55.46	2.11	5.24	5	98.924	47.9848	0.485067	0.905788	0.182524	0.634952	0.365048	1.82524					43.464	1.509	72.409	Accept
	Owen et al. (2005)	Owen2005-N	Owen2005-053	PR78	255.69	35.52	42.47	5	140.906	86.4134	0.61327	1.32831	0.907963	0.815925	0.184075	0.920374	5	140.906	86.4134	0.61327	114.784	1.509	130.398	Accept							5	140.906	86.4134	0.61327
	Owen et al. (2005)	Owen2005-N	Owen2005-054	PR79	150.3	4.73	14.14	5	140.906	86.4134	0.61327	0.10871	0.543284	0.0865675	0.913432	4.56716					9.394	1.509	130.398	Accept
	Owen et al. (2005)	Owen2005-N	Owen2005-055	PR80	55.43	2.91	5.61	5	140.906	86.4134	0.61327	0.989153	0.161294	0.677411	0.322589	1.61294					85.476	1.509	130.398	Accept
	Owen et al. (2005)	Owen2005-N	Owen2005-056	PR81	56.17	2.53	5.48	5	140.906	86.4134	0.61327	0.980589	0.163398	0.673205	0.326795	1.63398					84.736	1.509	130.398	Accept
	Owen et al. (2005)	Owen2005-N	Owen2005-057	PR82	186.94	9.38	19.18	5	140.906	86.4134	0.61327	0.532719	0.702886	0.405772	0.594228	2.97114					46.034	1.509	130.398	Accept
Tangra Yum Co (Inner Tibet)	Rades et al. (2015)	Rade2015-C	Rade2015-009	12TYB8	18.48	0.57	1.68	3	15.5667	6.83287	0.438942	0.42637	0.665081	0.330162	0.669838	2.00951	3	15.5667	6.83287	0.438942	2.91333	1.196	8.17211	Accept							3	15.5667	6.83287	0.438942
	Rades et al. (2015)	Rade2015-C	Rade2015-010	12TYB9	7.76	0.26	0.71	3	15.5667	6.83287	0.438942	1.14252	0.12662	0.74676	0.25324	0.759719					7.80667	1.196	8.17211	Accept
	Rades et al. (2015)	Rade2015-C	Rade2015-011	12TYB10	20.46	0.64	1.87	3	15.5667	6.83287	0.438942	0.716146	0.763049	0.526099	0.473901	1.4217					4.89333	1.196	8.17211	Accept
Otgontenger, Bogd (Hangai)	Batbaatar et al. (2018)	Roth2014b-A	Batb2018-041	OT-AG-1	22.26	1.22	2.27	6	21.7733	6.17215	0.283473	0.0788488	0.531424	0.0628471	0.937153	5.62292	5	19.55	3.24735	0.166105	0.486667	1.61	9.93717	Accept	1.299	8.01763	Accept				5	19.55	3.24735	0.166105
	Batbaatar et al. (2018)	Roth2014b-A	Batb2018-042	OT-AG-2	19.84	1.34	2.16	6	21.7733	6.17215	0.283473	0.313235	0.377051	0.245898	0.754102	4.52461					1.93333	1.61	9.93717	Accept	1.299	8.01763	Accept
	Batbaatar et al. (2018)	Roth2014b-A	Batb2018-043	OT-AG-3	23.15	1.29	2.37	6	21.7733	6.17215	0.283473	0.223045	0.58825	0.176499	0.823501	4.941					1.37667	1.61	9.93717	Accept	1.299	8.01763	Accept
	Rother et al. (2014)	Roth2014b-A	Roth2014b-001	MON-D-II-I	16.33	0.41	1.46	6	21.7733	6.17215	0.283473	0.881918	0.188911	0.622179	0.377821	2.26693					5.44333	1.61	9.93717	Accept	1.299	8.01763	Accept
	Rother et al. (2014)	Roth2014b-A	Roth2014b-002	MON-D-II-II	16.17	0.41	1.45	6	21.7733	6.17215	0.283473	0.907841	0.181981	0.636038	0.363962	2.18377					5.60333	1.61	9.93717	Accept	1.299	8.01763	Accept
	Rother et al. (2014)	Roth2014b-A	Roth2014b-003	MON-D-II-III	32.89	0.83	2.95	6	21.7733	6.17215	0.283473	1.8011	0.964156	0.928313	0.071687	0.430122					11.1167	1.61	9.93717	Reject
	Rother et al. (2014)	Roth2014b-B	Roth2014b-004	MON-D-IV-I	21.22	0.53	1.9	3	18.1033	3.25819	0.179978	0.956562	0.830606	0.661212	0.338788	1.01636	3	18.1033	3.25819	0.179978	3.11667	1.196	3.8968	Accept							3	18.1033	3.25819	0.179978
	Rother et al. (2014)	Roth2014b-B	Roth2014b-005	MON-D-IV-II	18.37	0.48	1.65	3	18.1033	3.25819	0.179978	0.0818449	0.532615	0.06523	0.93477	2.80431					0.266667	1.196	3.8968	Accept
	Rother et al. (2014)	Roth2014b-B	Roth2014b-006	MON-D-IV-III	14.72	0.44	1.34	3	18.1033	3.25819	0.179978	1.03841	0.14954	0.70092	0.29908	0.897241					3.38333	1.196	3.8968	Accept
	Rother et al. (2014)	Roth2014b-C	Roth2014b-007	MON-F-I-I	26.24	0.71	2.36	3	25.7033	2.52809	0.0983565	0.212282	0.584056	0.168113	0.831887	2.49566	3	25.7033	2.52809	0.0983565	0.536667	1.196	3.02359	Accept							3	25.7033	2.52809	0.0983565
	Rother et al. (2014)	Roth2014b-C	Roth2014b-008	MON-F-I-II	27.92	0.73	2.51	3	25.7033	2.52809	0.0983565	0.876815	0.809706	0.619413	0.380587	1.14176					2.21667	1.196	3.02359	Accept
	Rother et al. (2014)	Roth2014b-C	Roth2014b-009	MON-F-I-IV	22.95	0.59	2.06	3	25.7033	2.52809	0.0983565	1.0891	0.138056	0.723889	0.276111	0.828334					2.75333	1.196	3.02359	Accept
	Rother et al. (2014)	Roth2014b-E	Roth2014b-013	MON-D-I-I	44.27	1.08	3.97	3	35.7933	12.0732	0.337304	0.702105	0.758693	0.517386	0.482614	1.44784	3	35.7933	12.0732	0.337304	8.47667	1.196	14.4396	Accept							3	35.7933	12.0732	0.337304
	Rother et al. (2014)	Roth2014b-E	Roth2014b-014	MON-D-I-II	21.97	0.53	1.96	3	35.7933	12.0732	0.337304	1.14496	0.126113	0.747774	0.252226	0.756679					13.8233	1.196	14.4396	Accept
	Rother et al. (2014)	Roth2014b-E	Roth2014b-015	MON-D-I-III	41.14	1.03	3.69	3	35.7933	12.0732	0.337304	0.442853	0.671064	0.342128	0.657872	1.97362					5.34667	1.196	14.4396	Accept
	Rother et al. (2014)	Roth2014b-F	Roth2014b-016	MON-E-I-I	42.03	1.06	3.78	3	43.85	13.5917	0.309959	0.133905	0.446739	0.106523	0.893477	2.68043	3	43.85	13.5917	0.309959	1.82	1.196	16.2557	Accept							3	43.85	13.5917	0.309959
	Rother et al. (2014)	Roth2014b-F	Roth2014b-017	MON-E-I-II	58.26	1.44	5.25	3	43.85	13.5917	0.309959	1.06021	0.855475	0.710949	0.289051	0.867153					14.41	1.196	16.2557	Accept
	Rother et al. (2014)	Roth2014b-F	Roth2014b-018	MON-E-I-III	31.26	1.59	3.12	3	43.85	13.5917	0.309959	0.926301	0.177145	0.64571	0.35429	1.06287					12.59	1.196	16.2557	Accept
	Rother et al. (2014)	Roth2014b-G	Roth2014b-019	MON-E-II-I	62.21	1.79	5.68	3	41.5333	19.6307	0.47265	1.05328	0.853894	0.707788	0.292212	0.876637	3	41.5333	19.6307	0.47265	20.6767	1.196	23.4783	Accept							3	41.5333	19.6307	0.47265
	Rother et al. (2014)	Roth2014b-G	Roth2014b-020	MON-E-II-II	23.15	0.61	2.08	3	41.5333	19.6307	0.47265	0.936457	0.174519	0.650962	0.349038	1.04711					18.3833	1.196	23.4783	Accept
	Rother et al. (2014)	Roth2014b-G	Roth2014b-021	MON-E-II-III	39.24	1	3.53	3	41.5333	19.6307	0.47265	0.116824	0.4535	0.0930002	0.907	2.721					2.29333	1.196	23.4783	Accept
Tanggula Shan (Inner Tibet)	Colgan et al. (2006)	Schä2002-E	Colg2006-001	TS-02-05	53.56	1.49	4.87	7	75.2229	14.9405	0.198616	1.44995	0.0735369	0.852926	0.147074	1.02952	7	75.2229	14.9405	0.198616	21.6629	1.693	25.2942	Accept							7	75.2229	14.9405	0.198616
	Owen et al. (2005)	Schä2002-E	Owen2005-048	PR71	57.47	2.45	5.55	7	75.2229	14.9405	0.198616	1.18824	0.117369	0.765261	0.234739	1.64317					17.7529	1.693	25.2942	Accept
	Owen et al. (2005)	Schä2002-E	Owen2005-049	PR72	78.78	2.62	7.34	7	75.2229	14.9405	0.198616	0.238088	0.594094	0.188187	0.811813	5.68269					3.55714	1.693	25.2942	Accept
	Owen et al. (2005)	Schä2002-E	Owen2005-050	PR73	80.3	2.04	7.29	7	75.2229	14.9405	0.198616	0.339825	0.633006	0.266012	0.733988	5.13792					5.07714	1.693	25.2942	Accept
	Owen et al. (2005)	Schä2002-E	Owen2005-051	PR74	74.08	3.46	7.31	7	75.2229	14.9405	0.198616	0.0764941	0.469513	0.060974	0.939026	6.57318					1.14286	1.693	25.2942	Accept
	Owen et al. (2005)	Schä2002-E	Owen2005-052	PR75	92.85	5.2	9.64	7	75.2229	14.9405	0.198616	1.17983	0.880965	0.76193	0.23807	1.66649					17.6271	1.693	25.2942	Accept
	Schäfer et al. (2002)	Schä2002-E	Schä2002-011	TAN7	89.52	5.04	9.3	7	75.2229	14.9405	0.198616	0.956941	0.830702	0.661403	0.338597	2.37018					14.2971	1.693	25.2942	Accept
Hoh lake (Hangai)	Smith et al. (2016)	Smit2016-B	Smit2016-003	MN0711-15A	38.12	1.05	3.45	3	34.0867	17.2572	0.506274	0.233719	0.592398	0.184797	0.815203	2.44561	3	34.0867	17.2572	0.506274	4.03333	1.196	20.6396	Accept							3	34.0867	17.2572	0.506274
	Smith et al. (2016)	Smit2016-B	Smit2016-004	MN0711-15B	48.97	1.35	4.44	3	34.0867	17.2572	0.506274	0.862442	0.805778	0.611556	0.388444	1.16533					14.8833	1.196	20.6396	Accept
	Smith et al. (2016)	Smit2016-B	Smit2016-005	MN0711-15C	15.17	0.42	1.37	3	34.0867	17.2572	0.506274	1.09616	0.136504	0.726992	0.273008	0.819025					18.9167	1.196	20.6396	Accept
Bumbat (Hangai)	Smith et al. (2016)	Smit2016-C	Smit2016-006	MN08-11-32A	26.26	0.9	2.43	3	23.9333	2.24063	0.0936197	1.0384	0.850457	0.700915	0.299085	0.897255	3	23.9333	2.24063	0.0936197	2.32667	1.196	2.6798	Accept							3	23.9333	2.24063	0.0936197
	Smith et al. (2016)	Smit2016-C	Smit2016-007	MN08-11-32B	21.79	0.82	2.04	3	23.9333	2.24063	0.0936197	0.956575	0.169391	0.661218	0.338782	1.01635					2.14333	1.196	2.6798	Accept
	Smith et al. (2016)	Smit2016-C	Smit2016-008	MN08-11-32C	23.75	0.8	2.19	3	23.9333	2.24063	0.0936197	0.0818221	0.467394	0.0652118	0.934788	2.80436					0.183333	1.196	2.6798	Accept
Menyuan (E Tibet)	Wang et al. (2013)	Wang2013-A	Wang2013-001	DLJ-01	25.53	0.76	2.32	3	28.0833	2.95487	0.105218	0.864111	0.193763	0.612473	0.387527	1.16258	3	28.0833	2.95487	0.105218	2.55333	1.196	3.53402	Accept							3	28.0833	2.95487	0.105218
	Wang et al. (2013)	Wang2013-A	Wang2013-002	DLJ-02	27.4	0.79	2.48	3	28.0833	2.95487	0.105218	0.231257	0.408558	0.182885	0.817115	2.45135					0.683333	1.196	3.53402	Accept
	Wang et al. (2013)	Wang2013-A	Wang2013-003	DLJ-03	31.32	1.07	2.9	3	28.0833	2.95487	0.105218	1.09537	0.863322	0.726645	0.273355	0.820066					3.23667	1.196	3.53402	Accept
	Wang et al. (2013)	Wang2013-B	Wang2013-004	DLJ-04	105.24	4.71	10.36	8	57.8712	20.3332	0.351353	2.32962	0.990087	0.980174	0.0198261	0.158609	7	51.1043	7.4133	0.145062	47.3687	1.763	35.8475	Reject							7	51.1043	7.4133	0.145062
	Wang et al. (2013)	Wang2013-B	Wang2013-005	DLJ-05	44.78	2.34	4.52	8	57.8712	20.3332	0.351353	0.643835	0.259841	0.480318	0.519682	4.15746					13.0912	1.763	35.8475	Accept	1.453	29.5442	Accept
	Wang et al. (2013)	Wang2013-B	Wang2013-006	DLJ-08	50	1.23	4.49	8	57.8712	20.3332	0.351353	0.387113	0.349336	0.301327	0.698673	5.58938					7.87125	1.763	35.8475	Accept	1.453	29.5442	Accept
	Wang et al. (2013)	Wang2013-B	Wang2013-007	DLJ-10	44.87	1.23	4.07	8	57.8712	20.3332	0.351353	0.639409	0.261278	0.477443	0.522557	4.18046					13.0012	1.763	35.8475	Accept	1.453	29.5442	Accept
	Wang et al. (2013)	Wang2013-B	Wang2013-008	DLJ-11	65.49	1.57	5.9	8	57.8712	20.3332	0.351353	0.374694	0.646056	0.292112	0.707888	5.6631					7.61875	1.763	35.8475	Accept	1.453	29.5442	Accept
	Wang et al. (2013)	Wang2013-B	Wang2013-009	DLJ-12	55.4	1.39	4.99	8	57.8712	20.3332	0.351353	0.121537	0.451633	0.0967347	0.903265	7.22612					2.47125	1.763	35.8475	Accept	1.453	29.5442	Accept
	Wang et al. (2013)	Wang2013-B	Wang2013-010	DLJ-16	51.01	1.33	4.61	8	57.8712	20.3332	0.351353	0.33744	0.367893	0.264215	0.735785	5.88628					6.86125	1.763	35.8475	Accept	1.453	29.5442	Accept
	Wang et al. (2013)	Wang2013-B	Wang2013-011	DLJ-18	46.18	1.35	4.21	8	57.8712	20.3332	0.351353	0.574982	0.282652	0.434697	0.565303	4.52243					11.6912	1.763	35.8475	Accept	1.453	29.5442	Accept
	Wang et al. (2013)	Wang2013-C	Wang2013-012	DLJ-07	30.29	1.26	2.9	5	25.954	2.8926	0.111451	1.499	0.933063	0.866126	0.133874	0.669371	5	25.954	2.8926	0.111451	4.336	1.509	4.36493	Accept							5	25.954	2.8926	0.111451
	Wang et al. (2013)	Wang2013-C	Wang2013-013	DLJ-13	22.83	0.62	2.06	5	25.954	2.8926	0.111451	1.08	0.140072	0.719857	0.280143	1.40072					3.124	1.509	4.36493	Accept
	Wang et al. (2013)	Wang2013-C	Wang2013-014	DLJ-14	26.87	0.68	2.41	5	25.954	2.8926	0.111451	0.31667	0.624253	0.248506	0.751494	3.75747					0.916	1.509	4.36493	Accept
	Wang et al. (2013)	Wang2013-C	Wang2013-015	DLJ-15	25.84	0.77	2.35	5	25.954	2.8926	0.111451	0.0394109	0.484281	0.0314372	0.968563	4.84281					0.114	1.509	4.36493	Accept
	Wang et al. (2013)	Wang2013-C	Wang2013-016	DLJ-19	23.94	0.76	2.19	5	25.954	2.8926	0.111451	0.69626	0.243133	0.513734	0.486266	2.43133					2.014	1.509	4.36493	Accept
	Wang et al. (2013)	Wang2013-D	Wang2013-017	DLJ-06	21.15	1.13	2.14	4	19.68	0.995892	0.0506042	1.47606	0.930037	0.860073	0.139927	0.559707	4	19.68	0.995892	0.0506042	1.47	1.383	1.37732	Reject							3	19.19	0.217025	0.0113093
	Wang et al. (2013)	Wang2013-D	Wang2013-018	DLJ-20	19.3	0.51	1.73	4	19.68	0.995892	0.0506042	0.381568	0.351391	0.297218	0.702782	2.81113					0.38	1.383	1.37732	Accept	1.078	1.07357	Accept
	Wang et al. (2013)	Wang2013-D	Wang2013-019	DLJ-21	19.33	0.51	1.74	4	19.68	0.995892	0.0506042	0.351444	0.362628	0.274745	0.725255	2.90102					0.35	1.383	1.37732	Accept	1.078	1.07357	Accept
	Wang et al. (2013)	Wang2013-D	Wang2013-020	DLJ-22	18.94	0.46	1.69	4	19.68	0.995892	0.0506042	0.743053	0.228725	0.54255	0.45745	1.8298					0.74	1.383	1.37732	Accept	1.078	1.07357	Accept
Borohoro (E Tian Shan)	Zhang et al. (2016)	Zhan2016a-D	Zhan2016a-014	AK-08-7	54.12	2.03	5.11	4	63.725	10.6112	0.166516	0.905173	0.182687	0.634626	0.365374	1.46149	4	63.725	10.6112	0.166516	9.605	1.383	14.6753	Accept	1.078	11.4389	Accept				3	58.73	4.38145	0.0746033
	Zhang et al. (2016)	Zhan2016a-D	Zhan2016a-015	AK-08-8	62.84	1.84	5.75	4	63.725	10.6112	0.166516	0.0834022	0.466766	0.0664683	0.933532	3.73413					0.885	1.383	14.6753	Accept	1.078	11.4389	Accept
	Zhang et al. (2016)	Zhan2016a-D	Zhan2016a-016	AK-08-9	59.23	2.84	5.87	4	63.725	10.6112	0.166516	0.423608	0.335926	0.328148	0.671852	2.68741					4.495	1.383	14.6753	Accept	1.078	11.4389	Accept
	Zhang et al. (2016)	Zhan2016a-D	Zhan2016a-017	AK-08-10	78.71	1.77	7.08	4	63.725	10.6112	0.166516	1.41218	0.921052	0.842104	0.157896	0.631584					14.985	1.383	14.6753	Reject
	Zhang et al. (2016)	Zhan2016a-F	Zhan2016a-020	GNS-08-2	32	0.77	2.86	4	21.7	7.69686	0.354694	1.33821	0.909586	0.819171	0.180829	0.723315	4	21.7	7.69686	0.354694	10.3	1.383	10.6448	Accept							4	21.7	7.69686	0.354694
	Zhang et al. (2016)	Zhan2016a-F	Zhan2016a-021	GNS-08-3	20.65	0.7	1.9	4	21.7	7.69686	0.354694	0.136419	0.445745	0.10851	0.89149	3.56596					1.05	1.383	10.6448	Accept
	Zhang et al. (2016)	Zhan2016a-F	Zhan2016a-022	GNS-08-4	13.35	0.49	1.24	4	21.7	7.69686	0.354694	1.08486	0.138992	0.722015	0.277985	1.11194					8.35	1.383	10.6448	Accept
	Zhang et al. (2016)	Zhan2016a-F	Zhan2016a-023	GNS-08-5	20.8	0.4	1.83	4	21.7	7.69686	0.354694	0.116931	0.453457	0.0930851	0.906915	3.62766					0.9	1.383	10.6448	Accept

## Sheet: Table S6
TABLE S6. Summary of outlier evaluations using Chauvenet's, Peirce's, and "normalized deviation" criteria
Glacier development in continental climate regions of central Asia
Jigjidsurengiin Batbaatar, Alan R. Gillespie, Michele Koppes, Douglas H. Clark, Oliver A. Chadwick, David Fink, Ari Matmon, Summer Rupper
corresponding author email: bataa@uw.edu
							Red boxed cells indicate the mean ages different from the mean ages before the rejection of outliers
							Red highlighted cells indicate the groups with 1σ total uncertainties equal to or larger than 50% of the mean age
																					Δ between mean ages after outlier rejection
Site (Subregion)	Publication	Group-ID	Number of samples before rejection	Group mean age before outlier analysis (ka)	1σ stdev of the mean (ka)	1σ stdev of the mean (% of mean)	Group mean age and stdev AFTER outlier analysis (ka±1σ)								Interpreted age for the group AFTER rejections per "Normalized deviation"						NormDev-Chav.		NormDev-Peirce
							Normalized deviation		Chauvenet's			Peirce's			n	Mean (ka)	1σ total uncertainty (ka)	1σ total uncertainty (%)	1σ age range for the group		ka	% of NormDev mean age	ka	% of NormDev mean age
Ala Bash (W Tian Shan)	Koppes et al. (2008)	Kopp2008-J	3	118.51	42.59	0.359379	142.09	17.16	118.51	42.59	0.359379	118.51	42.59	0.359379	2	142.1	25.7	0.180859	167.8–116.4 ka		23.58	0.165951	23.58	0.165951
Ala Bash (W Tian Shan)	Koppes et al. (2008)	Kopp2008-K	4	102.85	25.05	0.243559	102.12	6.88	102.85	25.05	0.243559	102.85	25.05	0.243559	2	102.1	15	0.146915	117.1–87.1 ka		-0.73	-0.00714845	-0.73	-0.00714845
Alashanje (E Tian Shan)	Li et al. (2014)	Li2014-A	5	57.17	81.66	1.42837	21.02	13.35	21.02	13.35	0.635109	21.02	13.35	0.635109	4	21	14.1	0.671429	35.1–6.9 ka		0	0	0	0
Alashanje (E Tian Shan)	Li et al. (2014)	Li2014-B	3	22.11	8.83	0.399367	17.49	5.24	22.11	8.83	0.399367	22.11	8.83	0.399367	2	17.5	5.8	0.331429	23.3–11.7 ka		-4.62	-0.264151	-4.62	-0.264151
Alashanje (E Tian Shan)	Li et al. (2014)	Li2014-D	5	29.18	7.84	0.268677	25.79	2.26	25.79	2.26	0.0876309	25.79	2.26	0.0876309	4	25.8	5.2	0.20155	31.0–20.6 ka		0	0	0	0
Alashanje (E Tian Shan)	Li et al. (2014)	Li2014-E	7	52.6	16.3	0.309886	46.84	6.35	46.84	6.35	0.135568	46.84	6.35	0.135568	6	46.8	12.3	0.262821	59.1–34.5 ka		0	0	0	0
Alashanje (E Tian Shan)	Li et al. (2014)	Li2014-F	3	68.98	13.03	0.188895	76.13	5.81	68.98	13.03	0.188895	68.98	13.03	0.188895	2	76.1	11.2	0.147175	87.3–64.9 ka		7.15	0.0939183	7.15	0.0939183
Ama Drime (E Himalaya)	Chevalier et al. (2011)	Chev2011-S	3	29.1	19.64	0.674914	17.79	2.09	29.1	19.64	0.674914	29.1	19.64	0.674914	2	17.8	3.1	0.174157	20.9–14.7 ka		-11.31	-0.63575	-11.31	-0.63575
At Bashi (W Tian Shan)	Zech (2012)	Zec2012-A	4	14.83	3.19	0.215105	16.37	1	14.83	3.19	0.215105	16.37	1	0.0610874	3	16.4	2.9	0.176829	19.3–13.5 ka		1.54	0.0940745	0	0
At Bashi (W Tian Shan)	Zech (2012)	Zec2012-B	5	20.11	2.72	0.135256	19.1	1.73	20.11	2.72	0.135256	20.11	2.72	0.135256	4	19.1	3.9	0.204188	23.0–15.2 ka		-1.01	-0.0528796	-1.01	-0.0528796
At Bashi (W Tian Shan)	Zech (2012)	Zec2012-C	3	49.32	26.84	0.544201	64.79	2.61	49.32	26.84	0.544201	49.32	26.84	0.544201	2	64.8	9	0.138889	73.8–55.8 ka		15.47	0.238771	15.47	0.238771
Baikal	Horiuchi et al. (2004)	Hori2004-A	3	15.08	0.76	0.0503979	15.08	0.76	15.08	0.76	0.0503979	15.08	0.76	0.0503979	3	15.1	4.5	0.298013	19.6–10.6 ka		0	0	0	0
Barskoon & Suek (W Tian Shan)	This study	Barskoon Suu-A	4	15.5	2.55	0.164516	16.58	1.64	15.5	2.55	0.164516	15.5	2.55	0.164516	3	16.6	3.1	0.186747	19.7–13.5 ka		1.08	0.0651387	1.08	0.0651387
Barskoon & Suek (W Tian Shan)	This study	Barskoon Suu-C	3	0.37	0.11	0.297297	0.37	0.11	0.37	0.11	0.297297	0.37	0.11	0.297297	3	0.4	0.2	0.5	0.6–0.2 ka		0	0	0	0
Barskoon & Suek (W Tian Shan)	Blomdin et al. (2016)	Blom-A	5	82.81	16.38	0.197802	89.49	7.74	82.81	16.38	0.197802	89.49	7.74	0.0864901	4	89.5	17.8	0.198883	107.3–71.7 ka		6.68	0.0746452	0	0
Barskoon & Suek (W Tian Shan)	Blomdin et al. (2016)	Blom-B	3	32.11	12.24	0.38119	25.74	7.5	32.11	12.24	0.38119	32.11	12.24	0.38119	2	25.7	8.2	0.319066	33.9–17.5 ka		-6.37	-0.247475	-6.37	-0.247475
Barskoon & Suek (W Tian Shan)	Blomdin et al. (2016)	Blom-C	4	19.38	5.99	0.309082	16.94	4.26	19.38	5.99	0.309082	19.38	5.99	0.309082	3	16.9	5.1	0.301775	22.0–11.8 ka		-2.44	-0.144038	-2.44	-0.144038
Barskoon & Suek (W Tian Shan)	Blomdin et al. (2016)	Blom-D	3	13.81	2.48	0.17958	15.15	1.22	13.81	2.48	0.17958	13.81	2.48	0.17958	2	15.2	2.3	0.151316	17.5–12.9 ka		1.34	0.0884488	1.34	0.0884488
Barskoon & Suek (W Tian Shan)	This study	Suek-A	3	18.53	4.01	0.216406	20.79	1.23	18.53	4.01	0.216406	18.53	4.01	0.216406	2	20.8	3	0.144231	23.8–17.8 ka		2.26	0.108706	2.26	0.108706
Bayan Har Shan (Inner Tibet)	Heyman et al. (2011)	Heym2011-C	3	16.2	4.21	0.259877	13.86	1.63	16.2	4.21	0.259877	16.2	4.21	0.259877	2	13.9	2.5	0.179856	16.4–11.4 ka		-2.34	-0.168831	-2.34	-0.168831
Bayan Har Shan (Inner Tibet)	Heyman et al. (2011)	Heym2011-D	4	62.43	15.37	0.246196	69.31	8.43	62.43	15.37	0.246196	62.43	15.37	0.246196	3	69.3	14	0.20202	83.3–55.3 ka		6.88	0.0992642	6.88	0.0992642
Bayan Har Shan (Inner Tibet)	Heyman et al. (2011)	Heym2011-G	3	71.34	24.96	0.349874	57.2	6.77	71.34	24.96	0.349874	71.34	24.96	0.349874	2	57.2	10	0.174825	67.2–47.2 ka		-14.14	-0.247203	-14.14	-0.247203
Bayan Har Shan (Inner Tibet)	Heyman et al. (2011)	Heym2011-H	3	65.98	48.43	0.73401	39.91	24.76	65.98	48.43	0.73401	65.98	48.43	0.73401	2	39.9	25.4	0.636591	65.3–14.5 ka		-26.07	-0.65322	-26.07	-0.65322
Bayan Har Shan (Inner Tibet)	Heyman et al. (2011)	Heym2011-I	3	56.6	25.49	0.450353	71.32	0.25	56.6	25.49	0.450353	56.6	25.49	0.450353	2	71.3	10.3	0.14446	81.6–61.0 ka		14.72	0.206394	14.72	0.206394
Bayan Har Shan (Inner Tibet)	Heyman et al. (2011)	Heym2011-J	3	38.9	23.32	0.599486	52.28	3.55	38.9	23.32	0.599486	38.9	23.32	0.599486	2	52.3	7.5	0.143403	59.8–44.8 ka		13.38	0.25593	13.38	0.25593
Bayan Har Shan (Inner Tibet)	Heyman et al. (2011)	Heym2011-L	3	34.01	18.18	0.534549	23.52	1	34.01	18.18	0.534549	34.01	18.18	0.534549	2	23.5	3.3	0.140426	26.8–20.2 ka		-10.49	-0.446003	-10.49	-0.446003
Bayan Har Shan (Inner Tibet)	Heyman et al. (2011)	Heym2011-M	3	108.22	80.85	0.747089	154.32	18.09	108.22	80.85	0.747089	108.22	80.85	0.747089	2	154.3	27.2	0.17628	181.5–127.1 ka		46.1	0.29873	46.1	0.29873
Bayan Har Shan (Inner Tibet)	Heyman et al. (2011)	Heym2011-N	3	60.28	4.52	0.0749834	57.78	1.85	60.28	4.52	0.0749834	60.28	4.52	0.0749834	2	57.8	7.5	0.129758	65.3–50.3 ka		-2.5	-0.0432676	-2.5	-0.0432676
Bayan Har Shan (Inner Tibet)	Heyman et al. (2011)	Heym2011-O	3	47.56	23.47	0.493482	34.29	6.67	47.56	23.47	0.493482	47.56	23.47	0.493482	2	34.3	8	0.233236	42.3–26.3 ka		-13.27	-0.386993	-13.27	-0.386993
Otgontenger, Bitüüt (Hangai)	Batbaatar et al. (2018)	Batb2018-M	3	47.11	29.62	0.628741	30.02	0.97	47.11	29.62	0.628741	47.11	29.62	0.628741	2	30	4	0.133333	34.0–26.0 ka		-17.09	-0.569287	-17.09	-0.569287
Otgontenger, Bitüüt (Hangai)	Batbaatar et al. (2018)	Batb2018-O	3	15.73	0.9	0.0572155	16.25	0.04	15.73	0.9	0.0572155	15.73	0.9	0.0572155	2	16.3	2.1	0.128834	18.4–14.2 ka		0.52	0.032	0.52	0.032
Borohoro (E Tian Shan)	Li et al. (2016)	Li2016-B	3	2.11	3.16	1.49763	0.29	0.13	2.11	3.16	1.49763	2.11	3.16	1.49763	2	0.3	0.1	0.333333	0.4–0.2 ka		-1.82	-6.27586	-1.82	-6.27586
Borohoro (E Tian Shan)	Zhang et al. (2016)	Zhan2016a-D	4	63.73	10.61	0.166484	58.73	4.38	63.73	10.61	0.166484	58.73	4.38	0.0745786	3	58.7	10.6	0.180579	69.3–48.1 ka		-5	-0.0851354	0	0
Borohoro (E Tian Shan)	Zhang et al. (2016)	Zhan2016a-F	4	21.7	7.7	0.354839	18.27	4.26	21.7	7.7	0.354839	21.7	7.7	0.354839	3	18.3	5.2	0.284153	23.5–13.1 ka		-3.43	-0.187739	-3.43	-0.187739
Bumbat (Hangai)	Batbaatar et al. (2018)	Batb2018-P	3	58.89	40.25	0.683478	37.4	21.63	58.89	40.25	0.683478	58.89	40.25	0.683478	2	37.4	22.3	0.596257	59.7–15.1 ka		-21.49	-0.574599	-21.49	-0.574599
Bumbat (Hangai)	Batbaatar et al. (2018)	Batb2018-Q	6	34.65	9.1	0.262626	34.29	3.75	34.65	9.1	0.262626	34.65	9.1	0.262626	4	34.3	7.6	0.221574	41.9–26.7 ka		-0.36	-0.0104987	-0.36	-0.0104987
Bumbat (Hangai)	Smith et al. (2016)	Smit2016-C	3	23.93	2.24	0.0936064	22.77	1.39	23.93	2.24	0.0936064	23.93	2.24	0.0936064	2	22.8	3.3	0.144737	26.1–19.5 ka		-1.16	-0.0509442	-1.16	-0.0509442
Chagan Uzun (Altai)	Gribenski et al. (2016)	Grib2016-A	3	20.79	3.01	0.144781	19.06	0.41	20.79	3.01	0.144781	20.79	3.01	0.144781	2	19.1	2.4	0.125654	21.5–16.7 ka		-1.73	-0.090766	-1.73	-0.090766
Chagan Uzun (Altai)	Gribenski et al. (2016)	Grib2016-C	4	18.3	0.83	0.0453552	18.3	0.83	18.3	0.83	0.0453552	18.3	0.83	0.0453552	4	18.3	3.3	0.180328	21.6–15.0 ka		0	0	0	0
Chagan Uzun (Altai)	Gribenski et al. (2016)	Grib2016-D	4	19.35	1.23	0.0635659	19.35	1.23	19.35	1.23	0.0635659	19.35	1.23	0.0635659	4	19.4	3.6	0.185567	23.0–15.8 ka		0	0	0	0
Chagan Uzun (Altai)	Gribenski et al. (2016)	Grib2016-E	5	21.99	7.38	0.335607	18.77	1.82	18.77	1.82	0.0969632	18.77	1.82	0.0969632	4	18.8	3.8	0.202128	22.6–15.0 ka		0	0	0	0
Chagan Uzun (Altai)	Reuther (2007)	Reu2007-C	3	15.63	0.33	0.0211132	15.63	0.33	15.63	0.33	0.0211132	15.63	0.33	0.0211132	3	15.6	2.7	0.173077	18.3–12.9 ka		0	0	0	0
Chagan Uzun (Altai)	Reuther (2007)	Reu2007-E	3	20.85	3.72	0.178417	20.85	3.72	20.85	3.72	0.178417	20.85	3.72	0.178417	3	20.9	6.9	0.330144	27.8–14.0 ka		0	0	0	0
Cho Oyu (E Himalaya)	Chevalier et al. (2011)	Chev2011-U	4	34.49	2.53	0.0733546	33.23	0.04	34.49	2.53	0.0733546	33.23	0.04	0.00120373	3	33.2	5.2	0.156627	38.4–28.0 ka		-1.26	-0.0379175	0	0
Choktal (W Tian Shan)	This study	Choktal river-A	3	22.2	1.27	0.0572072	22.2	1.27	22.2	1.27	0.0572072	22.2	1.27	0.0572072	3	22.2	3.7	0.166667	25.9–18.5 ka		0	0	0	0
Choktal (W Tian Shan)	This study	Choktal river-B	3	15.35	0.36	0.0234528	15.35	0.36	15.35	0.36	0.0234528	15.35	0.36	0.0234528	3	15.4	2.5	0.162338	17.9–12.9 ka		0	0	0	0
Choktal (W Tian Shan)	This study	Choktal river-C	3	0.25	0.01	0.04	0.25	0.01	0.25	0.01	0.04	0.25	0.01	0.04	3	0.3	0.1	0.333333	0.4–0.2 ka		0	0	0	0
Daxigou (E Tian Shan)	Kong et al. (2009)	Kong2009a-A	5	17.91	4.9	0.27359	19.6	3.58	17.91	4.9	0.27359	17.91	4.9	0.27359	4	19.6	5.4	0.27551	25.0–14.2 ka		1.69	0.0862245	1.69	0.0862245
Daxigou (E Tian Shan)	Kong et al. (2009)	Kong2009a-B	3	16.9	0.82	0.0485207	16.9	0.82	16.9	0.82	0.0485207	16.9	0.82	0.0485207	3	16.9	3	0.177515	19.9–13.9 ka		0	0	0	0
Daxigou (E Tian Shan)	Kong et al. (2009)	Kong2009a-C	3	19.59	3.28	0.167432	17.7	0.18	19.59	3.28	0.167432	19.59	3.28	0.167432	2	17.7	2.5	0.141243	20.2–15.2 ka		-1.89	-0.10678	-1.89	-0.10678
Daxigou (E Tian Shan)	Kong et al. (2009)	Kong2009a-D	5	11.71	4.75	0.405636	9.85	2.64	11.71	4.75	0.405636	11.15	0.6	0.0538117	4	9.9	3.6	0.363636	13.5–6.3 ka		-1.86	-0.188832	-1.3	-0.13198
Daxigou (E Tian Shan)	This study	Li2011-D	4	20.3	2.25	0.110837	19.34	1.44	20.3	2.25	0.110837	20.3	2.25	0.110837	3	19.3	3.6	0.186528	22.9–15.7 ka		-0.96	-0.0496381	-0.96	-0.0496381
Daxigou (E Tian Shan)	Li et al. (2011)	Li2011-E	6	17.44	1.39	0.0797018	17.44	1.39	17.44	1.39	0.0797018	17.21	1.42	0.0825102	6	17.4	4.2	0.241379	21.6–13.2 ka		0	0	0.23	0.0131881
Daxigou (E Tian Shan)	This study	Li2014-I	9	0.46	0.39	0.847826	0.34	0.09	0.46	0.39	0.847826	0.34	0.09	0.264706	8	0.3	0.3	1	0.6–0.0 ka		-0.12	-0.352941	0	0
Diehanjelegou (E Tian Shan)	This study	Diehanjelegou-B	4	37.87	14.07	0.371534	31.93	9.23	37.87	14.07	0.371534	37.87	14.07	0.371534	3	31.9	10.8	0.338558	42.7–21.1 ka		-5.94	-0.186032	-5.94	-0.186032
Dumda (Qilian Shan)	This study	Dumda-A	3	140.55	16.8	0.11953	131.52	8.66	140.55	16.8	0.11953	140.55	16.8	0.11953	2	131.5	19.2	0.146008	150.7–112.3 ka		-9.03	-0.0686588	-9.03	-0.0686588
Gangshiqia (Qilian Shan)	Owen et al. (2003b)	Owen2003d-C	3	13.1	1.2	0.0916031	13.1	1.2	13.1	1.2	0.0916031	13.1	1.2	0.0916031	3	13.1	2.4	0.183206	15.5–10.7 ka		0	0	0	0
Gangshiqia (Qilian Shan)	Owen et al. (2003b)	Owen2003d-D	3	17.1	6.1	0.356725	13.8	3.3	17.1	6.1	0.356725	17.1	6.1	0.356725	2	13.8	3.9	0.282609	17.7–9.9 ka		-3.3	-0.23913	-3.3	-0.23913
Gangshiqia (Qilian Shan)	This study	Qilian Shan-D	7	10.49	4.95	0.471878	11.72	4.09	10.49	4.95	0.471878	10.49	4.95	0.471878	6	11.7	4.9	0.418803	16.6–6.8 ka		1.23	0.104949	1.23	0.104949
Gichginii (Gobi-Altai)	Batbaatar et al. (2018)	Batb2018-A	4	6.81	1.2	0.176211	7.35	0.62	6.81	1.2	0.176211	6.81	1.2	0.176211	3	7.4	1.3	0.175676	8.7–6.1 ka		0.54	0.0734694	0.54	0.0734694
Gichginii (Gobi-Altai)	Batbaatar et al. (2018)	Batb2018-B	5	2.14	0.97	0.453271	2.48	0.69	2.14	0.97	0.453271	2.14	0.97	0.453271	4	2.5	0.8	0.32	3.3–1.7 ka		0.34	0.137097	0.34	0.137097
Gichginii (Gobi-Altai)	Batbaatar et al. (2018)	Batb2018-C	6	1.42	0.39	0.274648	1.42	0.39	1.42	0.39	0.274648	1.42	0.39	0.274648	6	1.4	0.6	0.428571	2.0–0.8 ka		0	0	0	0
Gulbel (W Tian Shan)	This study	Gulbel pass-A	3	19.69	3.74	0.189944	21.85	0.27	19.69	3.74	0.189944	19.69	3.74	0.189944	2	21.9	2.8	0.127854	24.7–19.1 ka		2.16	0.0988558	2.16	0.0988558
Gulbel (W Tian Shan)	This study	Gulbel pass-C	3	17.33	0.87	0.050202	17.33	0.87	17.33	0.87	0.050202	17.33	0.87	0.050202	3	17.3	3	0.17341	20.3–14.3 ka		0	0	0	0
Gulbel (W Tian Shan)	This study	Gulbel pass-D	3	16.79	0.87	0.0518166	16.79	0.87	16.79	0.87	0.0518166	16.79	0.87	0.0518166	3	16.8	2.8	0.166667	19.6–14.0 ka		0	0	0	0
Gurla Mandhata (W Himalaya)	Chevalier et al. (2011)	Chev2011-W	4	41.94	16.27	0.387935	48.35	12.28	41.94	16.27	0.387935	41.94	16.27	0.387935	3	48.4	14.6	0.301653	63.0–33.8 ka		6.41	0.132575	6.41	0.132575
Gyalgar (Hangai)	Batbaatar and Gillespie (2016)	BatGil2016-L	3	64.82	78.44	1.21012	19.56	3.72	64.82	78.44	1.21012	64.82	78.44	1.21012	2	19.6	4.7	0.239796	24.3–14.9 ka		-45.26	-2.31391	-45.26	-2.31391
Gyalgar (Hangai)	Batbaatar and Gillespie (2016)	BatGil2016-N	3	31.49	15.23	0.483646	22.8	3.28	31.49	15.23	0.483646	31.49	15.23	0.483646	2	22.8	4.4	0.192982	27.2–18.4 ka		-8.69	-0.38114	-8.69	-0.38114
Haiyuan (Qilian Shan)	Lasserre et al. (2002)	Lass2002-A	12	9.47	4.22	0.445618	9.47	4.22	9.47	4.22	0.445618	9.47	4.22	0.445618	12	9.5	5.6	0.589474	15.1–3.9 ka		0	0	0	0
Hogyin (Darhad)	Gillespie et al. (2008)	Gill2008-F	3	164.42	69.53	0.42288	125.24	21.44	164.42	69.53	0.42288	164.42	69.53	0.42288	2	125.2	26.8	0.214058	152.0–98.4 ka		-39.18	-0.312839	-39.18	-0.312839
Hogyin (Darhad)	Gillespie et al. (2008)	Gill2008-G	3	29.84	14.25	0.477547	22.44	8.79	29.84	14.25	0.477547	29.84	14.25	0.477547	2	22.4	9.3	0.415179	31.7–13.1 ka		-7.4	-0.329768	-7.4	-0.329768
Hoh lake (Hangai)	Smith et al. (2016)	Smit2016-B	3	34.09	17.26	0.506307	43.55	7.67	34.09	17.26	0.506307	34.09	17.26	0.506307	2	43.6	9.5	0.21789	53.1–34.1 ka		9.46	0.217222	9.46	0.217222
Ih Bogd (Gobi-Altai)	Batbaatar et al. (2018)	Batb2018-K	6	12.87	3.08	0.239316	14.02	1.38	14.02	1.38	0.0984308	14.02	1.38	0.0984308	5	14	3.4	0.242857	17.4–10.6 ka		0	0	0	0
Inylchek (W Tian Shan)	Lifton et al. (2014)	Lift2014-A	5	28.79	9.34	0.324418	31.82	7.41	28.79	9.34	0.324418	28.79	9.34	0.324418	4	31.8	9.4	0.295597	41.2–22.4 ka		3.03	0.0952231	3.03	0.0952231
Inylchek (W Tian Shan)	Lifton et al. (2014)	Lift2014-E	5	43.36	30.11	0.694419	43.36	30.11	43.36	30.11	0.694419	43.36	30.11	0.694419	5	43.4	31.9	0.735023	75.3–11.5 ka		0	0	0	0
Inylchek (W Tian Shan)	Lifton et al. (2014)	Lift2014-I	3	104.01	74.93	0.720411	145.27	31.83	104.01	74.93	0.720411	104.01	74.93	0.720411	2	145.3	39.3	0.270475	184.6–106.0 ka		41.26	0.284023	41.26	0.284023
Jarai (Darhad)	Gillespie et al. (2008)	Gill2008-D	7	27.96	11.32	0.404864	25.17	9.4	27.96	11.32	0.404864	27.96	11.32	0.404864	6	25.2	11.4	0.452381	36.6–13.8 ka		-2.79	-0.110846	-2.79	-0.110846
Jarai (Darhad)	Gillespie et al. (2008)	Gill2008-E	3	23.09	6.08	0.263317	19.67	1.97	23.09	6.08	0.263317	23.09	6.08	0.263317	2	19.7	3.2	0.162437	22.9–16.5 ka		-3.42	-0.173869	-3.42	-0.173869
Jombolok (Sayan)	Arzhannikov et al. (2012)	Arzh2012-B	3	24.87	1.05	0.0422195	24.87	1.05	24.87	1.05	0.0422195	24.87	1.05	0.0422195	3	24.9	4.9	0.196787	29.8–20.0 ka		0	0	0	0
Jombolok (Sayan)	Arzhannikov et al. (2012)	Arzh2012-C	3	32	10.21	0.319063	26.12	0.74	32	10.21	0.319063	32	10.21	0.319063	2	26.1	4	0.153257	30.1–22.1 ka		-5.88	-0.225115	-5.88	-0.225115
Jombolok (Sayan)	Batbaatar and Gillespie (2016)	BatGil2016-E	4	24.14	6.68	0.276719	20.86	1.6	24.14	6.68	0.276719	20.86	1.6	0.0767018	3	20.9	4.1	0.196172	25.0–16.8 ka		-3.28	-0.157239	0	0
Kailas (C Himalaya)	Chevalier et al. (2011)	Chev2011-X	8	17.44	1.85	0.106078	17.44	1.85	17.44	1.85	0.106078	17.44	1.85	0.106078	8	17.4	4.9	0.281609	22.3–12.5 ka		0	0	0	0
Kailas (C Himalaya)	Chevalier et al. (2011)	Chev2011-Y	14	44.6	12.92	0.289686	46.53	11.15	44.6	12.92	0.289686	44.6	12.92	0.289686	13	46.5	19.2	0.412903	65.7–27.3 ka		1.93	0.0414786	1.93	0.0414786
Kailas (C Himalaya)	Chevalier et al. (2011)	Chev2011-Z	7	68.39	91.16	1.33294	34.05	8.28	34.05	8.28	0.243172	34.05	8.28	0.243172	6	34.1	11.3	0.331378	45.4–22.8 ka		0	0	0	0
Kalurong (Inner Tibet)	Liu et al. (2017)	Liu2017-B	4	10.67	9.92	0.929709	10.67	9.92	10.67	9.92	0.929709	10.67	9.92	0.929709	4	10.7	10.2	0.953271	20.9–0.5 ka		0	0	0	0
Kalurong (Inner Tibet)	Liu et al. (2017)	Liu2017-C	3	17.07	7.85	0.459871	21.59	0.9	17.07	7.85	0.459871	17.07	7.85	0.459871	2	21.6	2.9	0.134259	24.5–18.7 ka		4.52	0.209356	4.52	0.209356
Kalurong (Inner Tibet)	Liu et al. (2017)	Liu2017-D	3	13.3	5.91	0.444361	16.69	1.12	13.3	5.91	0.444361	13.3	5.91	0.444361	2	16.7	2.4	0.143713	19.1–14.3 ka		3.39	0.203116	3.39	0.203116
Kanas (Altai)	Gribenski et al. (2018)	Grib2018-A	3	18.53	0.38	0.0205073	18.53	0.38	18.53	0.38	0.0205073	18.53	0.38	0.0205073	3	18.5	2.9	0.156757	21.4–15.6 ka		0	0	0	0
Kanas (Altai)	Gribenski et al. (2018)	Grib2018-B	3	17.82	5.57	0.31257	21.04	0.05	17.82	5.57	0.31257	17.82	5.57	0.31257	2	21	2.6	0.12381	23.6–18.4 ka		3.22	0.153042	3.22	0.153042
Kanas (Altai)	Gribenski et al. (2018)	Grib2018-C	3	105.58	123.02	1.16518	34.96	18.5	105.58	123.02	1.16518	105.58	123.02	1.16518	2	35	19.1	0.545714	54.1–15.9 ka		-70.62	-2.02002	-70.62	-2.02002
Kanas (Altai)	Gribenski et al. (2018)	Grib2018-D	3	50.1	28.97	0.578244	66.75	4.04	50.1	28.97	0.578244	50.1	28.97	0.578244	2	66.8	9.2	0.137725	76.0–57.6 ka		16.65	0.249438	16.65	0.249438
Karakax-A (W Kunlun)	This study	Karakax-A	3	87.26	5.39	0.0617694	90.21	2.47	87.26	5.39	0.0617694	87.26	5.39	0.0617694	2	90.2	12	0.133038	102.2–78.2 ka		2.95	0.0327015	2.95	0.0327015
Karakax-B (W Kunlun)	This study	Karakax-B5	4	4.17	4.82	1.15588	2.29	3.7	4.17	4.82	1.15588	4.17	4.82	1.15588	3	2.3	3.8	1.65217	6.1–-1.5 ka		-1.88	-0.820961	-1.88	-0.820961
Karola (Inner Tibet)	Liu et al. (2017)	Liu2017-E	4	5.49	7.52	1.36976	1.96	3.21	5.49	7.52	1.36976	1.96	3.21	1.63776	3	2	3.3	1.65	5.3–-1.3 ka		-3.53	-1.80102	0	0
Karola (Inner Tibet)	Liu et al. (2017)	Liu2017-F	4	0.24	0.06	0.25	0.24	0.06	0.24	0.06	0.25	0.24	0.06	0.25	4	0.2	0.1	0.5	0.3–0.1 ka		0	0	0	0
Koyandy (W Tian Shan)	Blomdin et al. (2016)	Blom-E	5	2.1	2.12	1.00952	1.3	1.29	2.1	2.12	1.00952	1.3	1.29	0.992308	4	1.3	1.3	1	2.6–0.0 ka		-0.8	-0.615385	0	0
Koyandy (W Tian Shan)	Blomdin et al. (2016)	Blom-F	5	14.49	3.41	0.235335	15.65	2.55	14.49	3.41	0.235335	14.49	3.41	0.235335	4	15.7	3.8	0.242038	19.5–11.9 ka		1.16	0.0741214	1.16	0.0741214
La Ji (Qilian Shan)	Owen et al. (2003a)	Owen2003c-C	4	38.1	25.61	0.672178	25.35	3	38.1	25.61	0.672178	25.35	3	0.118343	3	25.4	4.9	0.192913	30.3–20.5 ka		-12.75	-0.502959	0	0
Laolongwan (Qilian Shan)	Owen et al. (2003b)	Owen2003d-A	3	13.22	3.85	0.291225	11.01	0.36	13.22	3.85	0.291225	13.22	3.85	0.291225	2	11	1.4	0.127273	12.4–9.6 ka		-2.21	-0.200727	-2.21	-0.200727
Laolongwan (Qilian Shan)	Owen et al. (2003b)	Owen2003d-E	3	19.45	0.53	0.0272494	19.15	0.01	19.45	0.53	0.0272494	19.45	0.53	0.0272494	2	19.2	2.5	0.130208	21.7–16.7 ka		-0.3	-0.0156658	-0.3	-0.0156658
Mawang Kangri (Inner Tibet)	Amidon et al. (2013)	Amid2013-A	7	61.93	20.74	0.334894	62.68	8.23	61.93	20.74	0.334894	62.68	8.23	0.131302	5	62.7	14.9	0.23764	77.6–47.8 ka		0.75	0.0119655	0	0
Menyuan (E Tibet)	Wang et al. (2013)	Wang2013-A	3	28.08	2.95	0.105057	26.47	1.32	28.08	2.95	0.105057	28.08	2.95	0.105057	2	26.5	3.6	0.135849	30.1–22.9 ka		-1.61	-0.0608236	-1.61	-0.0608236
Menyuan (E Tibet)	Wang et al. (2013)	Wang2013-B	8	57.87	20.33	0.351305	51.1	7.41	51.1	7.41	0.14501	51.1	7.41	0.14501	7	51.1	14.5	0.283757	65.6–36.6 ka		0	0	0	0
Menyuan (E Tibet)	Wang et al. (2013)	Wang2013-C	5	25.95	2.89	0.111368	24.87	1.82	25.95	2.89	0.111368	25.95	2.89	0.111368	4	24.9	4.9	0.196787	29.8–20.0 ka		-1.08	-0.0434258	-1.08	-0.0434258
Menyuan (E Tibet)	Wang et al. (2013)	Wang2013-D	4	19.68	1	0.050813	19.68	1	19.68	1	0.050813	19.19	0.22	0.0114643	4	19.7	3.8	0.192893	23.5–15.9 ka		0	0	0.49	0.0248984
Mönh-Saridag (Sayan)	Batbaatar and Gillespie (2016)	BatGil2016-B	3	10.1	0.49	0.0485149	10.1	0.49	10.1	0.49	0.0485149	10.1	0.49	0.0485149	3	10.1	1.8	0.178218	11.9–8.3 ka		0	0	0	0
Mönh-Saridag (Sayan)	Batbaatar and Gillespie (2016)	BatGil2016-D	3	24.49	4.25	0.17354	26.87	1.44	24.49	4.25	0.17354	24.49	4.25	0.17354	2	26.9	3.7	0.137546	30.6–23.2 ka		2.38	0.0885746	2.38	0.0885746
Nyainqentanghla (Inner Tibet)	Chevalier et al. (2011)	Chev2011-C	5	15.47	4.75	0.307046	13.51	2.11	15.47	4.75	0.307046	13.51	2.11	0.156181	4	13.5	3.2	0.237037	16.7–10.3 ka		-1.96	-0.145078	0	0
Nyainqentanghla (Inner Tibet)	Chevalier et al. (2011)	Chev2011-D	10	35.01	13.08	0.373608	31.71	8.35	35.01	13.08	0.373608	31.71	8.35	0.263324	9	31.7	12	0.378549	43.7–19.7 ka		-3.3	-0.104068	0	0
Nyainqentanghla (Inner Tibet)	Chevalier et al. (2011)	Chev2011-E	10	50.32	14.08	0.279809	53.54	10.32	50.32	14.08	0.279809	53.54	10.32	0.192753	9	53.5	17.8	0.33271	71.3–35.7 ka		3.22	0.0601419	0	0
Nyainqentanghla (Inner Tibet)	Dong et al. (2017a)	Dong2017a-A	5	16.08	8.01	0.498134	19.63	1.19	19.63	1.19	0.0606215	19.63	1.19	0.0606215	4	19.6	4.4	0.22449	24.0–15.2 ka		0	0	0	0
Nyainqentanghla (Inner Tibet)	Dong et al. (2017a)	Dong2017a-B	5	20.31	0.85	0.0418513	20.31	0.85	20.31	0.85	0.0418513	20.31	0.85	0.0418513	5	20.3	4.5	0.221675	24.8–15.8 ka		0	0	0	0
Otgontenger, Bogd (Hangai)	Batbaatar et al. (2018)	Roth2014b-A	6	21.77	6.17	0.283418	19.55	3.25	19.55	3.25	0.16624	19.55	3.25	0.16624	5	19.6	5.5	0.280612	25.1–14.1 ka		0	0	0	0
Otgontenger, Bogd (Hangai)	Rother et al. (2014)	Roth2014b-B	3	18.1	3.26	0.18011	19.8	2.02	18.1	3.26	0.18011	18.1	3.26	0.18011	2	19.8	3.2	0.161616	23.0–16.6 ka		1.7	0.0858586	1.7	0.0858586
Otgontenger, Bogd (Hangai)	Rother et al. (2014)	Roth2014b-C	3	25.7	2.53	0.0984436	27.08	1.19	25.7	2.53	0.0984436	25.7	2.53	0.0984436	2	27.1	3.6	0.132841	30.7–23.5 ka		1.38	0.0509601	1.38	0.0509601
Otgontenger, Bogd (Hangai)	Rother et al. (2014)	Roth2014b-E	3	35.79	12.07	0.337245	42.71	2.21	35.79	12.07	0.337245	35.79	12.07	0.337245	2	42.7	5.9	0.138173	48.6–36.8 ka		6.92	0.162023	6.92	0.162023
Otgontenger, Bogd (Hangai)	Rother et al. (2014)	Roth2014b-F	3	43.85	13.59	0.30992	36.65	7.62	43.85	13.59	0.30992	43.85	13.59	0.30992	2	36.7	9.1	0.247956	45.8–27.6 ka		-7.2	-0.196453	-7.2	-0.196453
Otgontenger, Bogd (Hangai)	Rother et al. (2014)	Roth2014b-G	3	41.53	19.63	0.47267	31.2	11.38	41.53	19.63	0.47267	41.53	19.63	0.47267	2	31.2	12.1	0.387821	43.3–19.1 ka		-10.33	-0.33109	-10.33	-0.33109
Sailag (Sayan)	Batbaatar and Gillespie (2016)	Arzh2012-D	12	25.91	19.12	0.737939	17.83	3.14	21.97	14.05	0.639508	17.83	3.14	0.176108	10	17.8	6.5	0.365169	24.3–11.3 ka		-4.14	-0.232193	0	0
Samdain Kangsang (Inner Tibet)	Chevalier et al. (2011)	Chev2011-A	7	18.4	0.98	0.0532609	18.4	0.98	18.4	0.98	0.0532609	18.4	0.98	0.0532609	7	18.4	4.4	0.23913	22.8–14.0 ka		0	0	0	0
Samdain Kangsang (Inner Tibet)	Chevalier et al. (2011)	Chev2011-B	8	20.49	1.83	0.0893119	20.02	1.35	20.49	1.83	0.0893119	20.02	1.35	0.0674326	7	20	5	0.25	25.0–15.0 ka		-0.47	-0.0234765	0	0
Sentsa (Sayan)	Arzhannikov et al. (2012)	Arzh2012-A	4	18.26	1.4	0.0766703	17.58	0.42	18.26	1.4	0.0766703	17.58	0.42	0.0238908	3	17.6	4.3	0.244318	21.9–13.3 ka		-0.68	-0.0386803	0	0
Sutai (Gobi-Altai)	Batbaatar et al. (2018)	Batb2018-E	4	19.8	8.89	0.44899	24.2	1.62	19.8	8.89	0.44899	24.2	1.62	0.0669421	3	24.2	4.3	0.177686	28.5–19.9 ka		4.4	0.181818	0	0
Sutai (Gobi-Altai)	Batbaatar et al. (2018)	Batb2018-F	3	27.08	15.73	0.580871	18.61	8	27.08	15.73	0.580871	27.08	15.73	0.580871	2	18.6	8.5	0.456989	27.1–10.1 ka		-8.47	-0.455132	-8.47	-0.455132
Sutai (Gobi-Altai)	Batbaatar et al. (2018)	Batb2018-J	5	13.85	4.98	0.359567	15.85	2.5	13.85	4.98	0.359567	15.85	2.5	0.157729	4	15.9	3.8	0.238994	19.7–12.1 ka		2	0.126183	0	0
Tailan (W Tian Shan)	Hubert-Ferrari et al. (2005)	Hube2005-A	10	16.93	3.86	0.227998	17.66	3.28	16.93	3.86	0.227998	16.93	3.86	0.227998	9	17.7	5.9	0.333333	23.6–11.8 ka		0.73	0.0413364	0.73	0.0413364
Takelekete (W Tian Shan)	Zhang et al. (2016)	Zhan2016a-B	8	55.14	14.59	0.264599	51.96	12.41	55.14	14.59	0.264599	55.14	14.59	0.264599	7	52	17.9	0.344231	69.9–34.1 ka		-3.18	-0.0612009	-3.18	-0.0612009
Tanggula Shan (Inner Tibet)	Owen et al. (2005)	Owen2005-L	4	61.22	7.75	0.126593	57.52	2.77	61.22	7.75	0.126593	57.52	2.77	0.0481572	3	57.5	9.4	0.163478	66.9–48.1 ka		-3.7	-0.0643255	0	0
Tanggula Shan (Inner Tibet)	Owen et al. (2005)	Owen2005-M	5	98.92	47.98	0.485038	98.92	47.98	98.92	47.98	0.485038	98.92	47.98	0.485038	5	98.9	53	0.535895	151.9–45.9 ka		0	0	0	0
Tanggula Shan (Inner Tibet)	Owen et al. (2005)	Owen2005-N	5	140.91	86.41	0.613228	140.91	86.41	140.91	86.41	0.613228	140.91	86.41	0.613228	5	140.9	99.5	0.706175	240.4–41.4 ka		0	0	0	0
Tanggula Shan (Inner Tibet)	Colgan et al. (2006)	Schä2002-E	7	75.22	14.94	0.198617	75.22	14.94	75.22	14.94	0.198617	75.22	14.94	0.198617	7	75.2	24.9	0.331117	100.1–50.3 ka		0	0	0	0
Tangra Yum Co (Inner Tibet)	Rades et al. (2015)	Rade2015-C	3	15.57	6.83	0.438664	19.47	1.4	15.57	6.83	0.438664	15.57	6.83	0.438664	2	19.5	2.9	0.148718	22.4–16.6 ka		3.9	0.200308	3.9	0.200308
Tomort (E Tian Shan)	Chen et al. (2015)	Chen2015-B	3	15.52	1.73	0.111469	14.53	0.11	15.52	1.73	0.111469	15.52	1.73	0.111469	2	14.5	1.9	0.131034	16.4–12.6 ka		-0.99	-0.0681349	-0.99	-0.0681349
W Himalaya	Chevalier et al. (2011)	Chev2011-AB	7	159.52	29.41	0.184366	152.04	23.81	159.52	29.41	0.184366	159.52	29.41	0.184366	6	152	41.9	0.275658	193.9–110.1 ka		-7.48	-0.0491976	-7.48	-0.0491976
W Himalaya	Chevalier et al. (2011)	Chev2011-AC	3	65.17	43.71	0.670707	89.12	19.51	65.17	43.71	0.670707	65.17	43.71	0.670707	2	89.1	22.6	0.253648	111.7–66.5 ka		23.95	0.268739	23.95	0.268739
W Himalaya	Chevalier et al. (2011)	Chev2011-AD	8	59.12	21.9	0.370433	59.12	21.9	59.12	21.9	0.370433	59.12	21.9	0.370433	8	59.1	27.2	0.460237	86.3–31.9 ka		0	0	0	0
Xainza (Inner Tibet)	Chevalier et al. (2011)	Chev2011-G	3	87.17	59.05	0.677412	53.24	8.06	87.17	59.05	0.677412	87.17	59.05	0.677412	2	53.2	10.4	0.195489	63.6–42.8 ka		-33.93	-0.637303	-33.93	-0.637303
Xainza (Inner Tibet)	Chevalier et al. (2011)	Chev2011-J	4	432.62	240.33	0.555522	320.75	107.46	432.62	240.33	0.555522	432.62	240.33	0.555522	3	320.8	120.4	0.375312	441.2–200.4 ka		-111.87	-0.348776	-111.87	-0.348776
Xainza (Inner Tibet)	Chevalier et al. (2011)	Chev2011-K	5	46.12	2.91	0.0630963	47.22	1.81	46.12	2.91	0.0630963	46.12	2.91	0.0630963	4	47.2	8.5	0.180085	55.7–38.7 ka		1.1	0.0232952	1.1	0.0232952
Xainza (Inner Tibet)	Chevalier et al. (2011)	Chev2011-L	7	14.21	1.72	0.121042	13.66	0.99	13.66	0.99	0.0724744	13.66	0.99	0.0724744	6	13.7	3.1	0.226277	16.8–10.6 ka		0	0	0	0
Xainza (Inner Tibet)	Chevalier et al. (2011)	Chev2011-M	11	38.06	14.24	0.374146	38.06	14.24	38.06	14.24	0.374146	38.06	14.24	0.374146	11	38.1	18.4	0.48294	56.5–19.7 ka		0	0	0	0
Xainza (Inner Tibet)	Chevalier et al. (2011)	Chev2011-N	9	32.16	2.82	0.0876866	31.46	2.01	31.46	2.01	0.0638907	31.46	2.01	0.0638907	8	31.5	8.1	0.257143	39.6–23.4 ka		0	0	0	0
Xainza (Inner Tibet)	Chevalier et al. (2011)	Chev2011-O	8	29.05	22.28	0.766954	21.68	8.5	21.68	8.5	0.392066	21.68	8.5	0.392066	7	21.7	10	0.460829	31.7–11.7 ka		0	0	0	0
Xainza (Inner Tibet)	Dong et al. (2017b)	Dong2017b-A	4	0.32	0.14	0.4375	0.25	0.04	0.32	0.14	0.4375	0.25	0.04	0.16	3	0.3	0.1	0.333333	0.4–0.2 ka		-0.07	-0.28	0	0

## Sheet: Table S7
TABLE S7. Mean 10Be ages for groups with two samples
Glacier development in continental climate regions of central Asia
Jigjidsurengiin Batbaatar, Alan R. Gillespie, Michele Koppes, Douglas H. Clark, Oliver A. Chadwick, David Fink, Ari Matmon, Summer Rupper
corresponding author email: bataa@uw.edu
Site (Subregion)	Publication	Group ID	Expage sample ID	Original sample ID	Age, Xi (ka)	1σ internal uncertainty in age (ka)	1σ external uncertainty in age (ka)	Number of samples within the group	µ , mean of the group (ka)	1σ total uncertainty of the group age (ka)	1σ total uncertainty of the group age (%)	1σ age range for the group
Kax Kurta (Altai)	This study	Kax Kurta-A		XCS-120a	16.79	0.72	1.61	2	17.3	2.4	0.138728	19.7–14.9 ka
	This study	Kax Kurta-A		XCS-120b	17.74	0.7	1.68
Chagan Uzun (Altai)	Gribenski et al. (2016)	Grib2016-B	Grib2016-004	AL13C-33	19.22	0.42	1.7	2	25.4	9.4	0.370079	34.8–16.0 ka
	Gribenski et al. (2016)	Grib2016-B	Grib2016-005	AL13C-34	31.65	0.4	2.75
Diehanjelegou (E Tian Shan)	This study	Diehanjelegou-C		XCS-101	38.64	1.33	3.59	2	30	12.9	0.43	42.9–17.1 ka
	This study	Diehanjelegou-C		XCS-102	21.41	0.78	2
Alashanje (E Tian Shan)	This study	Alashanje		CS-111a	84	2.33	7.69	2	67.7	24.8	0.366322	92.5–42.9 ka
	This study	Alashanje		CS-111b	51.34	1.61	4.72
	Li et al. (2014)	Li2014-C	Li2014-010	AR-10-007	24.95	1.1	2.41	2	28.8	6.6	0.229167	35.4–22.2 ka
	Li et al. (2014)	Li2014-C	Li2014-013	AR-10-011	32.6	0.8	2.92
Daxigou (E Tian Shan)	Li et al. (2011)	Li2011-A	Li2011-001	07-13	17.51	0.83	1.71	2	17.3	2.3	0.132948	19.6–15.0 ka
	Li et al. (2011)	Li2011-A	Li2011-002	07-15	17.18	0.39	1.52
	Li et al. (2011)	Li2011-C	Li2011-004	07-23	17.33	0.37	1.53	2	16.5	2.4	0.145455	18.9–14.1 ka
	Li et al. (2011)	Li2011-C	Li2011-005	07-25	15.76	0.74	1.54
Muzart (W Tian Shan)	This study	Muzart-A		CS-32	18.24	0.9	1.8	2	21.7	7	0.322581	28.7–14.7 ka
	This study	Muzart-A		CS-33	25.16	4.08	4.61
	This study	Muzart-B		CS-28	15.42	1.21	1.79	2	16	2.6	0.1625	18.6–13.4 ka
	This study	Muzart-B		CS-30	16.63	0.98	1.73
Inylchek (W Tian Shan)	Lifton et al. (2014)	Lift2014-D	Lift2014-008	TS12-IN-09	18.99	0.49	1.7	2	16.4	6.4	0.390244	22.8–10.0 ka
	Lifton et al. (2014)	Lift2014-D	Lift2014-009	TS12-IN-10	13.72	4.82	4.96
	Lifton et al. (2014)	Lift2014-G	Lift2014-016	TS12-SD-01	16.33	7.7	7.83	2	14.5	8.4	0.57931	Uncertain
	Lifton et al. (2014)	Lift2014-G	Lift2014-017	TS12-SD-02	12.59	0.63	1.25
Gulbel (W Tian Shan)	This study	Gulbel pass-B		GP-004A	13.24	0.72	1.34	2	31.3	26.1	0.833866	Uncertain
	This study	Gulbel pass-B		GP-004B	49.44	2.3	4.86
	Koppes et al. (2008)	Kopp2008-A	Kopp2008-001	SCT-020901-2	42.06	1.04	3.77	2	38	7.5	0.197368	45.5–30.5 ka
	Koppes et al. (2008)	Kopp2008-A	Kopp2008-002	SCT-020901-3	33.87	0.86	3.04
	Koppes et al. (2008)	Kopp2008-B	Kopp2008-003	SCT-020901-4	31.49	0.8	2.83	2	37.5	9.8	0.261333	47.3–27.7 ka
	Koppes et al. (2008)	Kopp2008-B	Kopp2008-004	SCT-020901-5	43.46	1.31	3.97
At Bashi (W Tian Shan)	Koppes et al. (2008)	Kopp2008-E	Kopp2008-007	KTS98-CS-62a	4.97	0.16	0.45	2	4.9	0.6	0.122449	5.5–4.3 ka
	Koppes et al. (2008)	Kopp2008-E	Kopp2008-008	KTS98-CS-62b	4.74	0.14	0.43
Ala Bash (W Tian Shan)	Koppes et al. (2008)	Kopp2008-I	Kopp2008-012	KTS98-CS-87	65.36	0.79	5.73	2	68.2	9.4	0.13783	77.6–58.8 ka
	Koppes et al. (2008)	Kopp2008-I	Kopp2008-013	KTS98-CS-88	71.06	1.21	6.29
	Koppes et al. (2008)	Kopp2008-L	Kopp2008-021	KTS98-CS-97	92.64	2.2	8.39	2	72.2	30.5	0.422438	102.7–41.7 ka
	Koppes et al. (2008)	Kopp2008-L	Kopp2008-022	KTS98-CS-98	51.66	1.24	4.64
Gangshiqia (Qilian Shan)	This study	Qilian Shan-A		QS-GG-008	18.69	0.92	1.85	2	18.2	2.6	0.142857	20.8–15.6 ka
	This study	Qilian Shan-A		QS-GG-009	17.66	0.57	1.62
	This study	Qilian Shan-B		QS-GG-010	14.92	0.88	1.55	2	14	2.4	0.171429	16.4–11.6 ka
	This study	Qilian Shan-B		QS-GG-011	13.05	0.66	1.3
Laolongwan (Qilian Shan)	Owen et al. (2003a)	Owen2003c-F	Owen2003c-013	LJ13	20.6	0.46	1.83	2	20.1	2.6	0.129353	22.7–17.5 ka
	Owen et al. (2003a)	Owen2003c-F	Owen2003c-014	LJ14	19.62	0.31	1.71
Mawang Kangri (Inner Tibet)	Amidon et al. (2013)	Amid2013-B	Amid2013-008	18	91.47	1.44	8.12	2	91.9	11.5	0.125136	103.4–80.4 ka
	Amidon et al. (2013)	Amid2013-B	Amid2013-009	19	92.36	1.14	8.15
Aksaiqin (W Kunlun)	This study	Aksaiqin-A		AG1-1	39.73	1.59	3.78	2	31.1	13	0.418006	44.1–18.1 ka
	This study	Aksaiqin-A		AG1-2	22.38	0.7	2.05
	This study	Aksaiqin-B		AG1-3	15.53	0.38	1.38	2	29.2	19.7	0.674658	Uncertain
	This study	Aksaiqin-B		AG1-4	42.8	1.05	3.84
Karakax-B (W Kunlun)	This study	Karakax-B1		KG1-14	314.14	9.89	30.67	2	211.9	148.2	0.699387	Uncertain
	This study	Karakax-B1		KG1-15	109.63	3.89	10.38
	This study	Karakax-B2		KG1-8	97.37	2.94	9.01	2	88.7	16.9	0.19053	105.6–71.8 ka
	This study	Karakax-B2		KG1-9	79.96	2.16	7.29
	This study	Karakax-B3		KG1-6	86.32	3.11	8.15	2	80.7	13.3	0.164808	94.0–67.4 ka
	This study	Karakax-B3		KG1-7	75.12	2.24	6.91
Mönh-Saridag (Sayan)	Batbaatar and Gillespie (2016)	BatGil2016-A	BatGil2016-001	070402-ag-RMS-1	12.1	0.61	1.2	2	12.1	1.6	0.132231	13.7–10.5 ka
	Batbaatar and Gillespie (2016)	BatGil2016-A	BatGil2016-002	070402-ag-RMS-2	12.08	0.38	1.1
	Batbaatar and Gillespie (2016)	BatGil2016-C	BatGil2016-006	070402-ag-RMS-6	1.45	0.12	0.17	2	1.3	0.3	0.230769	1.6–1.0 ka
	Batbaatar and Gillespie (2016)	BatGil2016-C	BatGil2016-007	070402-ag-RMS-7	1.21	0.09	0.14
Hoit Aguy (Sayan)	Batbaatar and Gillespie (2016)	BatGil2016-H	BatGil2016-026	080709-HA-JB-02	35.4	1.06	3.23	2	34.4	4.8	0.139535	39.2–29.6 ka
	Batbaatar and Gillespie (2016)	BatGil2016-H	BatGil2016-027	080709-HA-JB-03	33.38	1.62	3.3
Tengis (Sayan)	Batbaatar and Gillespie (2016)	BatGil2016-I	BatGil2016-028	150707-DB-ag-003A	23.48	0.66	2.12	2	21.9	3.6	0.164384	25.5–18.3 ka
	Batbaatar and Gillespie (2016)	BatGil2016-I	BatGil2016-029	150707-DB-ag-003C	20.34	0.71	1.88
Gyalgar (Hangai)	Batbaatar and Gillespie (2016)	BatGil2016-K	BatGil2016-033	ZAG-ARG-01A	23.9	0.92	2.25	2	21.9	4.1	0.187215	26.0–17.8 ka
	Batbaatar and Gillespie (2016)	BatGil2016-K	BatGil2016-034	ZAG-ARG-01B	19.83	0.6	1.81
Sutai (Gobi-Altai)	Batbaatar et al. (2018)	Batb2018-H	Batb2018-026	MOT98-CS-22	21.7	0.78	2.02	2	46.3	35.5	0.766739	Uncertain
	Batbaatar et al. (2018)	Batb2018-H	Batb2018-027	MOT98-CS-23	70.94	2.55	6.67
Ama Drime (E Himalaya)	Chevalier et al. (2011)	Chev2011-P	Chev2011-107	T5C-153	396.9	6.1	37.97	2	257.1	201.6	0.784131	Uncertain
	Chevalier et al. (2011)	Chev2011-P	Chev2011-108	T5C-154	117.33	2.12	10.53
	Chevalier et al. (2011)	Chev2011-Q	Chev2011-110	T5C-115	30.76	0.79	2.76	2	21.9	12.9	0.589041	Uncertain
	Chevalier et al. (2011)	Chev2011-Q	Chev2011-112	T5C-118	12.99	0.39	1.18
	Chevalier et al. (2011)	Chev2011-R	Chev2011-116	T5C-123	17.84	0.44	1.59	2	19.4	3.3	0.170103	22.7–16.1 ka
	Chevalier et al. (2011)	Chev2011-R	Chev2011-118	T5C-125	20.92	0.53	1.87
	Chevalier et al. (2011)	Chev2011-T	Chev2011-125	T5C-133	29.1	0.73	2.61	2	27.4	4.2	0.153285	31.6–23.2 ka
	Chevalier et al. (2011)	Chev2011-T	Chev2011-130	T5C-139	25.74	0.77	2.34
Tengis (Sayan)	Gillespie et al. (2008)	Gill2008-A	Gill2008-001	arg-Tin-01	20.93	0.55	1.88	2	22.2	3.4	0.153153	25.6–18.8 ka
	Gillespie et al. (2008)	Gill2008-A	Gill2008-002	arg-Tin-01b	23.51	0.56	2.1
	Gillespie et al. (2008)	Gill2008-B	Gill2008-003	rmb-Tin-01a	34	0.95	3.08	2	30.8	6	0.194805	36.8–24.8 ka
	Gillespie et al. (2008)	Gill2008-B	Gill2008-004	rmb-Tin-01c	27.56	0.68	2.46
	Gillespie et al. (2008)	Gill2008-C	Gill2008-005	arg-Uzg-002	16.71	0.56	1.54	2	23.3	9.9	0.424893	33.2–13.4 ka
	Gillespie et al. (2008)	Gill2008-C	Gill2008-006	arg-Uzg-003	29.96	0.87	2.72
Bayan Har Shan (Inner Tibet)	Heyman et al. (2011)	Heym2011-E	Heym2011-013	TB-06-16	50.55	1.08	4.5	2	57.3	12.2	0.212914	69.5–45.1 ka
	Heyman et al. (2011)	Heym2011-E	Heym2011-014	TB-06-17	64.14	2.46	6.08
	Heyman et al. (2011)	Heym2011-F	Heym2011-016	TB-06-05	41.89	1.94	4.1	2	31	16	0.516129	Uncertain
	Heyman et al. (2011)	Heym2011-F	Heym2011-017	TB-06-07	20.19	0.75	1.89
	Heyman et al. (2011)	Heym2011-K	Heym2011-033	TB-07-68	6.98	0.4	0.72	2	5.1	2.8	0.54902	Uncertain
	Heyman et al. (2011)	Heym2011-K	Heym2011-034	TB-07-69	3.15	0.34	0.44
Otgontenger, Bogd (Hangai)	Rother et al. (2014)	Roth2014b-D	Roth2014b-011	MON-E-III-II	18.54	0.56	1.69	2	18.4	2.4	0.130435	20.8–16.0 ka
	Rother et al. (2014)	Roth2014b-D	Roth2014b-012	MON-E-III-III	18.22	0.48	1.63

## Sheet: Table S8
TABLE S8. Estimations of modern ELA
Glacier development in continental climate regions of central Asia
Jigjidsurengiin Batbaatar, Alan R. Gillespie, Michele Koppes, Douglas H. Clark, Oliver A. Chadwick, David Fink, Ari Matmon, Summer Rupper
corresponding author email: bataa@uw.edu
Randolph Glacier Inventory 6.0 number (RGI Consortium, 2017)	Latitude (°N)	Longitude (°E)	Maximum elevation (m asl)	Minimum elevation (m asl)	Headwall elevation (m asl)	ELA (THAR=0.6; m asl)	Glacier slope (°)	Glacier aspect (° from 0)
RGI60-10.02970	52.5113	98.7961	2861	2510	2720	2640	13.5	348
RGI60-10.02960	52.5083	98.8101	2792	2451	2780	2650	23.6	38
RGI60-10.02962	52.5038	98.8192	3029	2362	2810	2630	17.6	15
RGI60-10.02963	52.4921	98.8265	2920	2450	2790	2650	21.2	57
RGI60-10.02911	51.7229	100.6	3431	2940	3380	3200	31.8	352
RGI60-10.02915	51.7186	100.6	3405	3230	3390	3330	999	180
RGI60-10.02299	50.2957	90.1142	3819	3000	3780	3470	24.7	0
RGI60-10.02300	50.2913	90.1329	3819	2919	3780	3440	25.6	42
RGI60-10.02298	50.2826	90.1319	3954	2989	3930	3550	18.7	60
RGI60-10.02306	50.2693	90.1486	3916	3123	3900	3590	15.2	85
RGI60-10.01729	50.1049	87.6912	4000	3080	3770	3490	31.1	36
RGI60-10.01730	50.0958	87.7117	3990	2670	3500	3170	26.8	49
RGI60-10.01734	50.0954	87.6519	3947	2790	3570	3260	26.9	296
RGI60-10.01737	50.0801	87.6902	3997	2677	3850	3380	21.1	88
RGI60-10.01726	50.0788	87.6405	3823	2750	3340	3100	22.5	329
RGI60-10.01735	50.0613	87.6974	3717	2710	3370	3110	25.5	48
RGI60-10.01732	50.0497	87.7455	3696	2490	3520	3110	19.3	49
RGI60-10.01840	49.8025	87.7057	3696	2510	3270	2970	15	8
RGI60-10.01836	49.7907	87.7607	3805	2560	3580	3170	16.3	56
RGI60-10.01843	49.7718	87.8304	3609	2822	3360	3140	14.5	59
RGI60-10.02441	49.7449	87.8242	3289	2870	3150	3040	17.5	9
RGI60-10.02440	49.7411	87.8684	3378	2771	3190	3020	16	22
RGI60-10.02461	49.7372	87.9123	3688	2730	3450	3160	18.6	35
RGI60-10.01459	49.1176	87.306	3498	2731	3170	2990	12.2	49
RGI60-10.01462	49.1073	87.285	3454	2824	3130	3010	13.4	234
RGI60-10.00693	49.076	85.442	3181	2856	2950	2910	24.2	32
RGI60-10.00713	49.0623	85.4347	3050	2708	3010	2890	18.3	356
RGI60-10.02127	48.9894	87.6007	3696	2371	3430	3010	26.6	8
RGI60-10.02126	48.9576	87.6313	3685	2710	3370	3110	13.2	93
RGI60-10.02561	47.8794	90.0218	3856	3140	3810	3540	18.6	21
RGI60-10.02907	47.6085	97.5572	3981	3628	3980	3840	31	93
RGI60-10.00628	47.0576	85.522	3708	2980	3600	3350	19.1	1
RGI60-10.00604	47.0556	85.5592	3818	3100	3700	3460	16.8	2
RGI60-10.00629	47.0555	85.5378	3710	3144	3500	3360	15	15
RGI60-10.02744	46.8971	91.4753	4168	3235	3710	3520	20.7	10
RGI60-10.02746	46.8967	91.5211	4048	3288	3700	3540	18	6
RGI60-10.02893	46.6244	93.592	4201	3548	4090	3870	15.1	327
RGI60-13.05225	44.6043	80.1727	3981	3162	3780	3530	20.7	8
RGI60-13.05200	44.585	80.2408	3733	3228	3550	3420	10.6	359
RGI60-13.05217	44.5727	80.1732	3997	3447	3860	3690	16.6	203
RGI60-13.05212	44.5558	80.2534	3989	3360	3750	3590	11.7	123
RGI60-13.47836	44.317	81.893	3527	3180	3380	3300	35.2	21
RGI60-13.45201	43.816	88.362	5416	3420	4270	3930	19.6	36
RGI60-13.48211	43.784	88.356	5201	3415	4530	4080	24.7	172
RGI60-13.46805	43.589	85.089	4992	3380	4290	3930	14.6	23
RGI60-13.46773	43.58	85.145	5059	3427	4520	4080	13.5	44
RGI60-13.46431	43.539	85.092	4783	3720	4590	4240	16	185
RGI60-13.46453	43.529	85.132	4740	3600	4260	4000	13.6	247
RGI60-13.45950	43.526	85.867	4786	3484	4270	3960	17.6	18
RGI60-13.45972	43.509	85.842	4769	3757	4630	4280	27.2	275
RGI60-13.45074	43.388	93.385	4173	3740	3980	3880	18.1	43
RGI60-13.48345	43.384	89.627	4219	3450	3850	3690	21.4	344
RGI60-13.48343	43.381	89.61	4113	3420	3840	3670	23.5	354
RGI60-13.45075	43.379	93.393	4133	3450	3960	3760	17.8	15
RGI60-13.45717	43.363	86.226	4342	3559	4240	3970	26.7	329
RGI60-13.46150	43.252	85.408	4528	3610	4290	4020	14.8	7
RGI60-13.46078	43.202	85.782	4311	3805	4150	4010	21.2	27
RGI60-13.45054	43.097	94.338	4757	3800	4270	4080	20.4	12
RGI60-13.29933	43.089	83.624	4099	3350	3780	3610	22.3	352
RGI60-13.44526	43.076	83.627	4133	3680	4050	3900	16.2	102
RGI60-13.48413	43.065	94.318	4872	3590	4350	4050	16.8	264
RGI60-13.08381	42.9548	77.1828	4437	3542	4390	4050	12.9	44
RGI60-13.08519	42.9275	77.2414	4599	3481	4410	4040	14.8	15
RGI60-13.08443	42.9132	77.7122	4208	3420	4050	3800	18.3	20
RGI60-13.08442	42.897	77.7125	4030	3480	3950	3760	14.6	87
RGI60-13.08576	42.8965	77.2127	4527	3582	4310	4020	14.3	238
RGI60-13.08551	42.833	77.075	4412	3470	4200	3910	11.2	4
RGI60-13.08552	42.8271	77.1005	4313	3540	4050	3850	11.9	20
RGI60-13.30062	42.825	82.371	4328	3410	4100	3820	9.4	25
RGI60-13.30120	42.706	83.023	4501	3466	4130	3860	15.4	347
RGI60-13.30108	42.69	82.989	4457	3444	4190	3890	13.1	346
RGI60-13.44374	42.537	83.84	4207	3480	4000	3790	21.9	348
RGI60-13.11744	42.4876	73.5686	4039	3610	3860	3760	16	39
RGI60-13.44218	42.465	83.792	4290	3651	3960	3840	21.7	23
RGI60-13.11606	42.4615	74.5297	4236	3430	4030	3790	13.2	317
RGI60-13.11609	42.4545	74.4977	4291	3380	4210	3880	14.4	335
RGI60-13.44296	42.381	84.296	4346	3595	3980	3830	23.6	3
RGI60-13.44284	42.375	84.282	4367	3797	4080	3970	21	289
RGI60-13.30835	42.368	81.5	4443	3628	4120	3920	13.8	357
RGI60-13.07682	42.3631	78.9662	4224	3700	4050	3910	15.3	321
RGI60-13.07671	42.3472	78.9778	4256	3769	4200	4030	18.8	43
RGI60-13.43928	42.34	81.49	4602	3706	4250	4030	13.9	248
RGI60-13.44203	42.315	83.863	4450	3698	4160	3980	20	43
RGI60-13.43613	42.305	80.922	6278	2759	5100	4160	24.4	310
RGI60-13.21879	42.2982	71.0445	4234	3330	3910	3680	16.9	29
RGI60-13.04960	42.2408	80.0965	6097	2980	4840	4100	16.7	281
RGI60-13.43663	42.216	80.956	6200	3212	4800	4160	24.8	199
RGI60-13.43483	42.156	80.334	6709	2692	5200	4200	27.5	98
RGI60-13.22075	42.1543	70.5074	3957	3440	3870	3700	15.7	343
RGI60-13.21810	42.1357	71.0251	4244	3628	4080	3900	20.8	338
RGI60-13.17134	42.0814	72.0772	3948	3204	3780	3550	11.8	350
RGI60-13.06421	42.0522	78.2052	4553	3900	4330	4160	8.6	148
RGI60-13.43308	42.043	80.352	6456	3253	4550	4030	28.6	155
RGI60-13.09028	42.0099	76.3747	4025	3642	3860	3770	18.3	5
RGI60-13.09249	41.9927	76.3994	3977	3614	3890	3780	21.2	353
RGI60-13.09742	41.9899	76.4216	4083	3660	3900	3800	21.3	357
RGI60-13.06740	41.9884	77.9219	4765	3890	4380	4180	12.5	126
RGI60-13.09176	41.9633	77.1783	4346	3739	4140	3980	18.1	359
RGI60-13.09142	41.9581	77.2629	4447	3748	4250	4050	12.9	1
RGI60-13.09129	41.9545	77.1966	4442	3780	4300	4090	14.8	27
RGI60-13.09143	41.948	77.2198	4473	3611	4280	4010	17.3	350
RGI60-13.06756	41.9287	77.7623	4511	3992	4320	4190	11.7	141
RGI60-13.07981	41.9156	77.7191	4543	4040	4280	4180	15.6	217
RGI60-13.08085	41.9012	78.3056	4898	3732	4450	4160	11.5	323
RGI60-13.06827	41.8755	77.6947	4323	3864	4230	4080	20.6	12
RGI60-13.08078	41.8456	78.367	4929	4050	4650	4410	14.9	141
RGI60-13.08031	41.7985	78.2914	4953	3798	4490	4210	15.6	66
RGI60-13.07064	41.7932	78.1638	4676	3830	4500	4230	13.7	324
RGI60-13.07137	41.7872	78.1405	4565	3874	4320	4140	15.5	346
RGI60-13.09627	41.635	76.2354	4406	3719	4170	3990	17.7	360
RGI60-13.09616	41.6331	76.3286	4250	3719	4130	3970	11.8	22
RGI60-13.09624	41.6286	76.2557	4410	3717	4150	3980	14.8	19
RGI60-13.09615	41.6257	76.354	4302	3721	4150	3980	14.6	30
RGI60-13.09870	41.0526	77.3214	5537	3862	5000	4540	18.1	359
RGI60-13.09756	41.0507	77.4616	5122	3821	4670	4330	13.9	2
RGI60-13.10403	41.0238	75.9068	4445	3694	4110	3940	26.6	11
RGI60-13.10332	41.0099	75.9127	4591	3992	4310	4180	14.9	173
RGI60-13.42756	40.998	77.325	5468	4127	4690	4460	16.8	163
RGI60-13.42780	40.998	77.45	5595	3760	4740	4350	19	232
RGI60-13.11941	40.9056	74.6379	4497	3908	4250	4110	29.1	28
RGI60-13.11940	40.9019	74.6475	4535	3860	4330	4140	30.1	8
RGI60-13.10444	40.6979	74.1214	4245	3888	4140	4040	18.7	47
RGI60-13.10547	40.695	74.3797	4741	3520	4390	4040	18.8	64
RGI60-13.10500	40.6724	74.4224	4601	3740	4190	4010	17.6	54
RGI60-13.12331	40.1278	73.7981	4365	3922	4270	4130	18.2	39
RGI60-13.42639	40.046	74.846	4841	3890	4550	4290	23.3	11
RGI60-13.42645	40.032	74.83	4826	4340	4690	4550	17.2	174
RGI60-13.12166	39.8918	73.1864	4461	3879	4350	4160	16.1	353
RGI60-13.12459	39.8904	73.175	4458	3932	4350	4180	18.6	7
RGI60-13.33017	39.556	96.318	5151	4347	5055	4770	22.1	345
RGI60-13.32963	39.5459	96.323	5288	4857	5100	5000	19	131
RGI60-13.32964	39.534	96.332	5142	4552	4970	4800	18	40
RGI60-13.32389	39.488	97.482	4857	4374	4770	4610	21.6	345
RGI60-13.32396	39.468	97.385	4924	4345	4850	4650	24.9	10
RGI60-13.32911	39.464	96.666	5401	4300	5310	4910	22.7	25
RGI60-13.32387	39.461	97.471	4978	4514	4790	4680	29.3	334
RGI60-13.32951	39.457	96.647	5442	4352	5330	4940	20	308
RGI60-13.32399	39.455	97.378	4983	4378	4770	4610	23.8	353
RGI60-13.32384	39.451	97.527	4959	4366	4890	4680	29.2	5
RGI60-13.33006	39.436	96.544	5439	4282	5220	4840	12.6	358
RGI60-13.33043	39.402	96.58	5420	4501	5230	4940	15.2	93
RGI60-13.32018	39.38	98.192	5261	4244	5010	4700	19.9	10
RGI60-13.33339	39.307	93.726	5386	4633	5275	5020	17.6	354
RGI60-13.33340	39.305	93.744	5494	4467	5390	5020	30	3
RGI60-13.33356	39.272	93.622	5751	4513	5590	5160	23.4	5
RGI60-13.33359	39.269	93.663	5695	4648	5530	5180	22.4	8
RGI60-13.42355	39.26	74.449	5804	3829	5070	4570	26.2	25
RGI60-13.34860	39.256	93.615	5758	5048	5630	5400	22.4	176
RGI60-13.34863	39.255	93.659	5685	5173	5595	5430	22.9	194
RGI60-13.32079	39.248	98.206	5237	4244	5010	4700	22.3	355
RGI60-13.32330	39.237	97.755	5113	4317	5010	4730	19.2	2
RGI60-13.42079	39.235	74.473	5754	4829	5450	5200	23.6	178
RGI60-13.42324	39.231	74.56	5655	3660	4550	4190	30.3	9
RGI60-13.32120	39.228	98.187	5229	4529	4970	4790	26.7	253
RGI60-13.31872	39.227	98.515	5220	4272	4985	4700	26.5	331
RGI60-13.32422	39.209	97.091	5310	4495	5270	4960	25.4	41
RGI60-13.42086	39.206	74.551	5794	4744	5450	5170	27.4	209
RGI60-13.32403	39.204	97.209	5068	4383	5000	4750	28.4	15
RGI60-13.32431	39.199	97.2	5114	4476	5080	4840	25.8	315
RGI60-13.32320	39.193	97.853	5109	4263	5060	4740	27.6	343
RGI60-13.32411	39.179	97.269	5158	4304	4985	4710	24.3	16
RGI60-13.32419	39.154	97.368	4921	4352	4810	4630	22.6	2
RGI60-13.31807	39.153	98.61	5226	4145	5120	4730	23.2	360
RGI60-13.31927	39.137	98.594	5220	4516	5020	4820	20.9	225
RGI60-13.12873	39.104	72.8197	5630	4378	5240	4900	12.6	28
RGI60-13.12653	39.0392	72.8802	5639	4487	5280	4960	12.7	5
RGI60-13.31741	38.988	99.126	4981	4214	4750	4540	27.3	346
RGI60-13.31761	38.977	99.121	5023	4349	4810	4630	25.3	300
RGI60-13.23331	38.9472	68.2789	3851	3430	3850	3680	19.1	349
RGI60-13.31707	38.935	99.315	4926	4254	4680	4510	19.9	7
RGI60-13.31708	38.927	99.324	4916	4236	4695	4510	21.7	12
RGI60-13.13402	38.8064	72.7546	5838	4530	5260	4970	14.2	31
RGI60-13.32801	38.74	97.168	5371	4563	5200	4950	11.5	341
RGI60-13.32804	38.73	97.19	5489	4609	5210	4970	17.3	354
RGI60-13.32716	38.711	97.626	5323	4484	5085	4840	20.9	7
RGI60-13.32733	38.675	97.704	5379	4417	5040	4790	25.7	330
RGI60-13.31607	38.669	98.868	4803	4390	4760	4610	24.4	335
RGI60-13.32794	38.648	97.348	5377	4588	5120	4910	19.1	2
RGI60-13.35144	38.626	97.353	5385	4705	5040	4910	13.2	112
RGI60-13.32774	38.563	97.666	5370	4542	5080	4860	20.5	2
RGI60-13.41792	38.558	75.248	7156	4282	5800	5190	21.3	228
RGI60-13.35152	38.55	97.641	5396	4600	5150	4930	18.6	206
RGI60-13.32649	38.506	97.759	5716	4371	5295	4930	21.3	28
RGI60-13.35165	38.477	97.731	5755	4557	5350	5030	17.2	207
RGI60-13.13986	38.444	73.4321	6079	4436	5380	5000	18.1	34
RGI60-13.14019	38.4082	73.4355	5882	4799	5500	5220	14.7	202
RGI60-13.35050	38.383	95.885	5189	4716	5090	4940	20.9	351
RGI60-13.35078	38.362	95.785	5449	4678	5310	5060	21.5	1
RGI60-13.35292	38.351	95.785	5445	4939	5230	5110	19.9	185
RGI60-13.35113	38.346	95.611	5274	4687	5080	4920	21	341
RGI60-13.35261	38.333	95.614	5339	4934	5185	5080	14	152
RGI60-13.31442	38.328	100.327	4863	4292	4700	4540	22.1	17
RGI60-13.35454	38.323	89.492	5760	4845	5190	5050	22.5	3
RGI60-13.34983	38.308	95.858	5223	4784	5100	4970	14.8	353
RGI60-13.35506	38.308	89.489	5797	4999	5360	5220	16.9	119
RGI60-13.31502	38.294	100.321	4682	4455	4670	4580	17.4	37
RGI60-13.34984	38.293	95.863	5349	4758	5180	5010	16	61
RGI60-13.31459	38.274	100.439	4750	4189	4550	4410	25.4	351
RGI60-13.31460	38.269	100.451	4663	4192	4620	4450	24.6	7
RGI60-13.35472	38.267	89.284	5348	4728	5300	5070	29.4	10
RGI60-13.35528	38.265	89.253	5499	4641	5170	4960	30.7	349
RGI60-13.35594	38.258	89.282	5378	5224	5300	5270	13.6	101
RGI60-13.31562	38.256	99.496	4801	4459	4770	4650	12.9	359
RGI60-13.32499	38.252	98.729	5259	4453	5040	4810	19.7	358
RGI60-13.31408	38.248	100.593	4955	4229	4610	4460	26	33
RGI60-13.31530	38.235	100.59	4789	4446	4680	4590	23.1	289
RGI60-13.33374	38.225	98.734	5020	4514	4940	4770	20.2	37
RGI60-13.31537	38.214	99.881	4765	4328	4580	4480	25.6	3
RGI60-13.35538	38.205	88.923	6039	4533	5690	5230	23.6	2
RGI60-13.35532	38.2	88.894	6006	4643	5570	5200	23.8	350
RGI60-13.34812	38.19	88.926	5976	5051	5700	5440	25.9	133
RGI60-13.34919	38.177	96.326	5527	4665	5110	4930	13.7	38
RGI60-13.35392	38.149	96.325	5476	4789	5240	5060	14.8	204
RGI60-13.35424	38.122	96.418	5310	4705	5250	5030	13.3	20
RGI60-13.35417	38.106	96.393	5354	4747	5280	5070	12.7	254
RGI60-13.35325	38.046	95.344	5656	4944	5460	5250	21.8	30
RGI60-13.35233	38.026	97.294	5095	4557	5025	4840	24.5	347
RGI60-13.35316	38.013	95.344	5360	4907	5280	5130	22.1	24
RGI60-13.35656	37.974	87.39	5856	4735	5625	5270	15.7	3
RGI60-13.35788	37.892	87.383	6223	5033	5710	5440	19.2	125
RGI60-13.35701	37.8	86.799	5773	5134	5580	5400	19.3	6
RGI60-13.34649	37.759	89.221	5608	5017	5420	5260	19.7	5
RGI60-13.34658	37.749	89.306	5632	4988	5500	5300	21.3	23
RGI60-13.34653	37.748	89.275	5639	4974	5520	5300	23.6	22
RGI60-13.34467	37.708	90.651	5622	4832	5180	5040	28.4	344
RGI60-13.23986	37.684	101.515	5130	4398	4990	4750	15.1	183
RGI60-13.34756	37.646	88.177	5677	4975	5430	5250	19.5	343
RGI60-13.36100	37.63	88.173	5696	5002	5520	5310	13.8	186
RGI60-13.36030	37.62	87.988	5485	5025	5370	5230	12.3	349
RGI60-13.21277	37.6	71.6436	4892	4291	4750	4570	25.2	46
RGI60-13.15124	37.5678	72.1404	5278	4576	5010	4840	18.9	345
RGI60-13.15560	37.5637	72.1116	5353	4682	5170	4970	18.2	355
RGI60-13.15116	37.5626	72.1825	5155	4497	5050	4830	15.2	338
RGI60-13.10747	37.5322	73.9321	5455	4728	5400	5130	28.4	346
RGI60-13.10746	37.5307	73.9186	5237	4815	5100	4990	20.7	8
RGI60-13.31353	37.52	101.807	4819	4228	4700	4510	23.1	18
RGI60-13.35966	37.514	87.845	5800	5155	5590	5420	13.8	360
RGI60-13.31354	37.513	101.817	4748	4155	4650	4450	20.9	2
RGI60-13.35949	37.499	87.821	5871	5117	5650	5440	13	7
RGI60-13.34633	37.45	90.336	5459	4906	5270	5120	22.1	357
RGI60-13.34561	37.431	90.353	5379	4975	5210	5120	17.9	2
RGI60-13.34567	37.43	90.368	5532	4973	5390	5220	16.6	9
RGI60-13.35994	37.386	87.903	5779	5070	5580	5380	15.5	347
RGI60-13.35873	37.38	87.669	6004	5164	5760	5520	15.5	9
RGI60-13.34490	37.309	91.167	5335	4974	5230	5130	18.3	20
RGI60-13.34397	37.307	91.174	5377	4932	5300	5150	24.3	30
RGI60-13.34398	37.301	91.177	5377	4934	5300	5150	19.7	47
RGI60-13.36419	37.262	85.764	6056	4920	5770	5430	16.7	346
RGI60-13.36431	37.237	85.783	6227	5255	5860	5620	16.7	104
RGI60-13.34524	37.236	90.821	5414	4882	5280	5120	14	343
RGI60-13.34515	37.229	90.793	5456	4970	5300	5170	18.6	8
RGI60-13.34520	37.227	90.808	5454	4961	5350	5190	16.1	347
RGI60-13.16050	37.185	72.5444	5661	4052	5330	4820	24.8	358
RGI60-13.34406	37.182	91.255	5389	4914	5300	5150	22.7	0
RGI60-13.34408	37.179	91.265	5387	4905	5320	5150	20.4	24
RGI60-13.16596	37.1789	72.4921	6623	4172	5200	4790	19.8	350
RGI60-13.34391	36.995	91.474	5311	4908	5295	5140	27.6	333
RGI60-13.34388	36.984	91.446	5242	4969	5210	5110	22.8	345
RGI60-13.34389	36.981	91.46	5239	4956	5220	5110	30.6	355
RGI60-13.36578	36.839	85.059	5972	5178	5530	5390	12.3	11
RGI60-13.54020	36.825	85.061	5920	5511	5750	5650	15.7	100
RGI60-14.22281	36.8109	72.4718	6798	4045	5200	4740	18.7	36
RGI60-14.22225	36.8082	72.3988	6544	4223	5500	4990	16.5	331
RGI60-13.36553	36.807	84.96	6031	5223	5770	5550	17.3	354
RGI60-14.27170	36.801	76.268	5858	4816	5520	5240	14.8	5
RGI60-13.54010	36.79	84.96	6025	5474	5870	5710	16.9	174
RGI60-14.01226	36.7795	73.8878	6341	3552	5620	4790	18.4	20
RGI60-13.36603	36.763	84.735	6154	5170	5820	5560	14	343
RGI60-14.27343	36.762	76.258	6067	5140	5620	5430	19.3	104
RGI60-13.36592	36.757	84.706	6162	5239	5880	5620	14.2	6
RGI60-13.53991	36.755	84.768	6096	5538	5910	5760	11.2	143
RGI60-14.23586	36.7459	72.4214	6319	4113	5880	5170	16.8	227
RGI60-13.53985	36.741	84.699	6171	5572	5930	5790	19.2	131
RGI60-14.23581	36.7392	72.4988	6318	3661	5390	4700	17.6	83
RGI60-14.01489	36.7371	74.132	6574	3679	5060	4510	21.7	32
RGI60-14.01541	36.7223	73.1442	6577	3990	5040	4620	23.4	340
RGI60-14.01853	36.697	73.1064	6483	3251	5330	4500	20	11
RGI60-14.01847	36.6932	73.162	6420	3811	5550	4850	23.8	201
RGI60-14.01893	36.6893	73.9445	6047	3300	4790	4190	18.7	100
RGI60-14.23645	36.6848	72.1705	6841	4169	6200	5390	22.4	338
RGI60-13.40560	36.683	78.432	6017	4795	5430	5180	19.1	352
RGI60-13.40442	36.655	78.436	5934	5048	5580	5370	17.9	238
RGI60-14.23757	36.6151	72.043	6669	3778	5530	4830	25.1	357
RGI60-13.48872	36.583	89.613	5490	4974	5340	5190	20.3	342
RGI60-13.34220	36.571	91.175	5783	5100	5600	5400	11.9	59
RGI60-13.48863	36.566	89.595	5485	4974	5390	5220	18.1	348
RGI60-13.34145	36.55	91.156	5789	5158	5590	5420	14.3	253
RGI60-13.49166	36.549	89.531	5636	5130	5480	5340	19.7	343
RGI60-13.40221	36.523	77.62	6165	4883	5910	5500	17.9	349
RGI60-13.48790	36.515	89.708	5607	5017	5400	5250	25.2	11
RGI60-13.48704	36.508	89.706	5700	5223	5580	5440	18.9	83
RGI60-13.36249	36.496	87.373	6230	5214	5900	5630	16.8	348
RGI60-13.40092	36.48	77.63	6246	5176	5960	5650	15.6	158
RGI60-13.49059	36.447	87.409	6903	5268	6060	5740	12.2	96
RGI60-14.03055	36.4111	74.212	5639	3389	5190	4470	29.3	32
RGI60-14.23872	36.3921	71.7961	6458	3851	6160	5240	17.9	297
RGI60-13.49113	36.364	87.59	6005	5246	5680	5510	13.6	49
RGI60-13.36735	36.359	83.043	6203	5048	6110	5690	16.9	338
RGI60-14.22569	36.3468	71.8168	7374	4019	6430	5470	17.4	81
RGI60-13.49043	36.341	87.596	6032	5376	5800	5630	11.3	123
RGI60-14.03893	36.3382	75.2055	7799	2911	6000	4760	26.9	8
RGI60-13.36675	36.332	83.05	6249	5575	6155	5920	24.3	67
RGI60-13.49044	36.327	87.28	6339	5385	6090	5810	9.4	160
RGI60-14.23881	36.3158	71.9362	7420	3654	5730	4900	14.6	56
RGI60-13.34108	36.263	91.824	5576	4981	5330	5190	15	333
RGI60-13.34118	36.25	91.872	5732	5045	5440	5280	14.9	349
RGI60-13.34022	36.249	91.822	5662	5078	5370	5250	15.3	229
RGI60-13.36686	36.246	82.478	6053	4895	5850	5470	20.2	357
RGI60-14.03334	36.2418	75.3077	7709	3234	5430	4550	24.4	34
RGI60-13.34028	36.238	91.862	5730	5093	5440	5300	16.9	289
RGI60-13.36755	36.235	82.442	5929	4883	5680	5360	18.8	333
RGI60-14.24800	36.2205	70.9617	6221	4875	5740	5390	16.4	244
RGI60-14.24903	36.2107	70.4878	5268	4757	5150	4990	10.8	92
RGI60-14.24905	36.1988	70.4724	5287	4789	5190	5030	10.1	111
RGI60-14.22540	36.1954	71.865	5875	4309	5730	5160	13.6	139
RGI60-14.24826	36.1869	71.0168	5342	4141	5300	4840	10	108
RGI60-13.49195	36.152	90.143	5776	5037	5700	5430	15.6	17
RGI60-13.49192	36.142	90.106	5995	5045	5700	5440	14.6	16
RGI60-13.49191	36.12	90.097	5909	5159	5720	5500	11.9	164
RGI60-14.04585	36.1162	74.5818	7215	2616	5040	4070	30.7	279
RGI60-13.48546	36.076	90.884	6775	5087	5790	5510	8.8	327
RGI60-13.39334	36.048	79.341	6665	5056	6000	5620	21.4	352
RGI60-14.04590	36.035	74.7335	6831	3087	5190	4350	25.4	249
RGI60-13.39412	36.014	79.322	6664	5085	6100	5690	19.3	191
RGI60-13.33973	36.002	90.901	6814	5034	6000	5610	17.5	166
RGI60-13.37226	35.954	80.838	6476	4215	5610	5050	26.3	5
RGI60-13.37222	35.943	80.812	6303	4620	5840	5350	19.2	0
RGI60-13.38356	35.867	79.489	6476	5319	6000	5730	15.1	45
RGI60-13.33411	35.853	96.934	5437	5012	5310	5190	31.4	359
RGI60-13.39442	35.845	79.489	6244	5688	6000	5880	12.7	254
RGI60-13.33911	35.84	91.939	5843	5016	5590	5360	18.4	356
RGI60-13.33400	35.831	96.949	5491	5059	5450	5290	28.4	340
RGI60-13.48990	35.819	91.961	5840	5120	5600	5410	9.9	153
RGI60-13.37983	35.819	80.422	6783	4775	6250	5660	15.8	30
RGI60-14.25238	35.8022	70.9438	5451	4202	5230	4820	12	358
RGI60-14.23260	35.7895	72.2592	5603	3960	5550	4910	11.3	313
RGI60-13.39589	35.776	78.574	6275	5411	6050	5790	14.2	103
RGI60-13.33718	35.774	93.674	5912	5005	5600	5360	16.2	341
RGI60-13.24855	35.753	93.671	5895	5100	5590	5390	17.2	201
RGI60-14.23259	35.7465	72.3086	5263	3974	4920	4540	15	123
RGI60-14.24037	35.7283	71.02	5874	4381	5100	4810	19.6	7
RGI60-13.39533	35.725	78.754	6437	5281	6100	5770	15.4	9
RGI60-13.33410	35.722	97.638	5425	5101	5300	5220	26.9	346
RGI60-13.33406	35.718	97.665	5237	5018	5150	5100	25.5	355
RGI60-13.53946	35.709	85.618	6271	5466	5900	5730	9.8	346
RGI60-13.54052	35.694	85.591	6267	5523	6000	5810	13.9	325
RGI60-13.33452	35.687	96.241	5440	4906	5400	5200	20.7	352
RGI60-13.36875	35.685	82.337	6801	5320	6370	5950	18.1	354
RGI60-13.53945	35.652	85.625	6334	5643	6170	5960	19.5	145
RGI60-13.53941	35.64	85.583	6271	5703	6150	5970	24.4	155
RGI60-13.38113	35.633	79.992	6497	5249	6170	5800	12.4	32
RGI60-14.07052	35.6329	75.6679	5870	3987	5340	4800	21.4	1
RGI60-13.36874	35.621	82.321	6931	5312	6430	5980	15	238
RGI60-13.33579	35.616	94.64	5618	4875	5510	5260	17.7	348
RGI60-14.07253	35.6013	75.7725	5692	3705	4930	4440	24.9	20
RGI60-13.33486	35.597	94.639	5692	5088	5510	5340	19.2	192
RGI60-13.53622	35.592	79.952	6504	5598	6260	6000	11.3	194
RGI60-13.53809	35.574	89.617	6215	5224	5880	5620	9.6	34
RGI60-13.53829	35.536	89.598	6199	5283	5920	5670	11.9	151
RGI60-13.37809	35.505	80.462	6401	5280	6400	5950	7.5	19
RGI60-13.53668	35.457	80.389	6352	5471	6350	6000	7.2	176
RGI60-13.37753	35.415	80.951	6851	4728	6250	5640	11.9	7
RGI60-14.21415	35.3912	72.7827	5559	3601	5130	4520	20.4	335
RGI60-14.21096	35.3744	72.7726	5316	3646	4950	4430	19.4	259
RGI60-13.53696	35.335	80.658	6657	5363	6230	5880	9.1	177
RGI60-14.20156	35.2981	74.6229	7375	3199	4750	4130	23.3	333
RGI60-13.53836	35.265	88.566	5993	5290	5830	5610	12.9	360
RGI60-13.53840	35.249	88.583	5941	5271	5820	5600	11.7	39
RGI60-14.20029	35.2259	74.6373	6633	3344	4700	4160	23.9	147
RGI60-14.07794	35.1223	77.5033	7168	4356	6160	5440	19.3	290
RGI60-14.08081	35.0853	77.5495	7245	4524	5680	5220	20.4	139
RGI60-14.08275	34.9706	78.4034	6307	5368	6030	5770	21.2	360
RGI60-14.08337	34.9387	78.4147	6453	5208	6010	5690	20.2	167
RGI60-13.23886	34.836	99.46	6252	4462	5670	5190	17.3	7
RGI60-13.54369	34.457	85.638	6314	5462	6000	5780	9.6	28
RGI60-13.54429	34.403	85.616	6409	5488	6070	5840	11.8	204
RGI60-13.53335	34.4	81.632	6246	5369	6100	5810	12.8	45
RGI60-13.51542	34.382	81.619	6239	5724	6010	5900	20.7	201
RGI60-13.53522	34.338	80.046	6496	5454	6110	5850	11	26
RGI60-14.12685	34.29	77.5792	5623	5214	5510	5390	14.9	16
RGI60-14.12596	34.0511	77.9826	5951	5431	5910	5720	19.2	8
RGI60-14.16334	34.0101	76.0199	7016	3584	5730	4870	14.5	329
RGI60-14.12587	34.0087	77.9442	5783	5423	5680	5580	22.9	350
RGI60-14.13014	33.9977	77.4508	5815	5259	5620	5480	17.1	41
RGI60-14.14383	33.9773	77.4505	5850	5287	5720	5550	19.6	29
RGI60-13.53885	33.943	89.128	6249	5343	6200	5860	7.9	51
RGI60-13.05045	33.8966	78.3921	6058	5364	5850	5660	24.8	14
RGI60-13.54211	33.894	89.122	6186	5424	6150	5860	4.2	221
RGI60-13.05092	33.8829	78.3968	6164	5510	5890	5740	19.8	56
RGI60-14.18749	33.8476	76.1703	6079	4156	4840	4570	10.9	344
RGI60-13.51429	33.812	82.34	6253	5363	6030	5760	18.2	12
RGI60-13.51614	33.764	82.339	6322	5374	6060	5790	15.6	311
RGI60-14.14419	33.6967	77.5756	6078	5494	5890	5730	14.5	122
RGI60-14.14437	33.6478	77.6047	5924	5281	5790	5590	16.2	360
RGI60-13.24073	33.588	94.961	5759	4984	5580	5340	10.1	340
RGI60-13.24067	33.584	94.931	5825	5043	5370	5240	11.3	354
RGI60-13.25285	33.555	94.945	5736	5148	5530	5380	14.6	227
RGI60-13.54355	33.494	86.619	6106	5521	6010	5810	13.2	2
RGI60-13.54283	33.472	86.773	6240	5443	6130	5860	18.8	335
RGI60-13.54251	33.467	86.793	6250	5515	6150	5900	14.6	88
RGI60-13.24821	33.424	91.091	6520	5372	6000	5750	14.5	283
RGI60-13.24653	33.412	91.168	6312	5329	6000	5730	10.8	131
RGI60-14.17267	33.3607	76.6914	5672	4152	5330	4860	8.4	39
RGI60-14.13509	33.3156	78.2066	6306	5506	6150	5890	19.9	21
RGI60-13.49370	33.304	88.713	6072	5504	5990	5800	12	105
RGI60-14.13528	33.3034	78.209	6365	5776	6350	6120	17.2	58
RGI60-13.54215	33.299	88.684	6078	5498	5940	5760	15	10
RGI60-13.54419	33.294	85.241	6191	5642	6100	5920	14.9	355
RGI60-13.23874	33.293	101.108	5295	4860	5230	5080	22.7	28
RGI60-13.54416	33.291	85.216	6171	5614	6060	5880	13.5	16
RGI60-13.25356	33.26	95.385	5686	4968	5530	5310	24.3	357
RGI60-14.17279	33.2428	76.7208	6186	4024	5385	4840	14.1	206
RGI60-13.53002	33.165	79.493	5956	5663	5940	5830	21.5	2
RGI60-13.52857	33.149	79.488	6044	5737	6030	5910	18.6	29
RGI60-13.25341	33.144	95.364	5570	5058	5430	5280	14.7	340
RGI60-13.52856	33.127	79.471	5954	5681	5950	5840	23.5	8
RGI60-13.24601	33.116	92.063	6084	5237	5660	5490	10	267
RGI60-13.24602	33.082	92.063	6085	5285	5850	5620	11	173
RGI60-13.49355	33.066	88.577	6233	5566	6020	5840	25.3	10
RGI60-13.49356	33.055	88.582	6251	5723	6150	5980	18.4	154
RGI60-14.13644	32.9768	78.1326	6241	5588	6000	5840	13.9	54
RGI60-14.13577	32.9196	78.2139	6157	5580	5900	5770	19.8	40
RGI60-14.13574	32.9115	78.204	6213	5801	6190	6030	12	171
RGI60-13.24422	32.793	92.681	5839	5316	5680	5530	11.5	327
RGI60-13.25611	32.72	92.69	5825	5324	5680	5540	15.1	29
RGI60-13.25393	32.704	96.871	5566	4896	5300	5140	19.7	20
RGI60-13.24030	32.697	96.888	5351	4964	5310	5170	17.2	72
RGI60-13.24036	32.651	96.962	5503	4991	5250	5150	23.9	3
RGI60-13.25401	32.644	96.951	5495	5019	5270	5170	23.7	304
RGI60-14.15173	32.5336	76.8823	5643	3572	5070	4470	24.4	318
RGI60-14.13757	32.521	77.9682	5747	5185	5650	5460	13.6	356
RGI60-14.26005	32.43	79.579	5947	5640	5840	5760	21.5	16
RGI60-13.54229	32.314	87.375	6207	5665	6060	5900	12.8	358
RGI60-13.49931	32.286	87.378	6268	5598	6070	5880	11	142
RGI60-14.15474	32.2653	77.392	5682	4018	5530	4930	25.4	6
RGI60-13.24957	32.05	98.834	5528	4756	5280	5070	18.5	32
RGI60-13.24922	32.033	98.822	5737	4782	5330	5110	32.4	221
RGI60-14.26162	32.024	79.878	6043	5442	5840	5680	7.7	34
RGI60-14.26180	31.984	79.905	6213	5373	5940	5710	8.8	52
RGI60-13.25041	31.899	95.422	5677	5075	5560	5370	11	45
RGI60-13.26066	31.884	95.408	5634	4983	5520	5310	13.7	300
RGI60-13.25914	31.847	94.684	6226	4674	5780	5340	18.2	20
RGI60-13.25834	31.807	94.667	6257	4191	5980	5260	15.7	204
RGI60-14.11748	31.7849	77.8795	5426	4680	5110	4940	13.1	13
RGI60-14.11744	31.7605	77.9071	5277	4683	5130	4950	14	337
RGI60-13.50416	31.692	83.493	6525	5783	6400	6150	10.8	89
RGI60-13.50415	31.68	83.492	6535	5758	6350	6110	13.1	91
RGI60-15.07681	31.661	99.552	5335	5030	5290	5190	31.3	27
RGI60-15.07732	31.655	99.553	5449	5048	5430	5280	17.7	200
RGI60-13.51211	31.62	83.408	6485	5684	6160	5970	16.5	308
RGI60-13.50391	31.568	85.105	6301	5478	6070	5830	16.1	346
RGI60-13.50394	31.551	85.117	6293	5646	6060	5890	16.3	145
RGI60-15.07704	31.53	99.882	5493	4894	5370	5180	22.7	64
RGI60-15.07702	31.508	99.87	5577	4982	5500	5290	23.3	328
RGI60-15.07735	31.473	100.195	5687	4316	5170	4830	27.9	38
RGI60-15.07738	31.458	100.194	5774	4868	5750	5400	26.4	244
RGI60-14.12371	31.4187	78.4676	5694	5116	5660	5440	14.2	116
RGI60-14.12373	31.4074	78.4581	5878	4975	5810	5480	17.6	155
RGI60-13.49952	31.392	86.547	5998	5823	5970	5910	24.3	45
RGI60-13.49951	31.378	86.546	6004	5751	5970	5880	30.5	40
RGI60-15.08038	31.324	103.013	5690	4692	5444	5140	26.5	333
RGI60-15.08040	31.308	103.028	5558	4564	5440	5090	34.6	77
RGI60-15.08009	31.273	103.098	5558	4679	5160	4970	24	28
RGI60-15.07971	31.19	102.891	5322	4883	5200	5070	16.4	196
RGI60-14.27840	31.082	81.245	6022	5532	5850	5720	15.2	220
RGI60-14.27863	31.068	81.331	6075	5273	5660	5510	20.3	355
RGI60-15.07924	31.046	101.316	5423	4851	5140	5020	26.6	55
RGI60-15.07747	31.04	101.308	5428	4965	5270	5150	18.6	166
RGI60-15.07519	31.0283	78.5432	6241	4240	5510	5000	19.8	5
RGI60-15.08775	30.987	79.267	6655	5145	6100	5720	14.4	6
RGI60-15.07165	30.9455	79.2957	6407	5079	6020	5640	10.8	130
RGI60-13.50910	30.858	83.386	6330	5721	6060	5920	18.1	338
RGI60-13.50727	30.845	83.388	6376	5779	6200	6030	12.7	120
RGI60-13.29100	30.84	91.442	6020	5345	5850	5650	18.2	118
RGI60-15.07500	30.8346	78.8842	6084	4030	5410	4860	14.4	94
RGI60-13.49584	30.826	88.669	6365	5487	6100	5850	20.8	74
RGI60-13.29082	30.818	91.413	6062	5246	5640	5480	15.8	80
RGI60-13.49577	30.804	88.652	6401	5463	6100	5850	18.7	156
RGI60-15.06881	30.8016	79.1472	6902	3999	5830	5100	15.8	353
RGI60-15.07075	30.7742	79.6106	5744	4157	5300	4840	13.4	265
RGI60-13.49540	30.671	88.513	6054	5516	5930	5760	20.7	26
RGI60-13.50111	30.657	86.466	6287	5703	6200	6000	12.1	103
RGI60-13.50726	30.592	83.386	6143	5626	6160	5950	18.2	26
RGI60-13.01098	30.5887	95.068	6076	4472	5380	5020	13.5	335
RGI60-13.27256	30.575	83.312	6188	5614	6140	5930	13.6	302
RGI60-13.01268	30.5476	95.059	6131	4065	5170	4730	16.8	115
RGI60-13.29027	30.47	90.68	6046	5526	5900	5750	13.9	37
RGI60-13.29023	30.457	90.668	6025	5667	5950	5840	10.3	147
RGI60-15.09020	30.421	81.313	7640	5330	6050	5760	15.6	158
RGI60-15.00183	30.3773	99.5742	5555	5031	5350	5220	14.6	202
RGI60-15.07922	30.322	101.693	5241	4875	5190	5060	21.2	355
RGI60-15.07750	30.311	101.699	5277	5008	5220	5140	21	137
RGI60-15.06313	30.2347	80.4522	6565	4302	5800	5200	20.8	77
RGI60-13.02445	30.2299	93.4461	6665	4076	5770	5090	20	20
RGI60-13.26974	30.214	82.163	6299	5086	5680	5440	12.4	40
RGI60-13.02453	30.1956	93.4395	6715	4259	5690	5120	30.4	135
RGI60-13.50364	30.149	85.058	6252	5586	6180	5940	14.7	347
RGI60-13.27737	30.134	85.059	6260	5804	6150	6010	14.6	206
RGI60-13.50528	30.061	84.905	6243	5797	6260	6070	13.3	21
RGI60-13.27677	30.052	84.902	6276	6057	6270	6180	19.5	177
RGI60-15.05353	30.0436	82.1817	5606	4792	5390	5150	16.3	188
RGI60-15.00036	29.9654	99.5985	5584	5231	5550	5420	18.9	141
RGI60-15.00034	29.9574	99.5887	5556	4969	5500	5290	18	192
RGI60-15.06472	29.9125	81.4911	6968	4512	5780	5270	21.6	357
RGI60-13.28457	29.912	90.04	6693	5217	5780	5550	24.4	44
RGI60-13.28456	29.892	90.032	6678	5388	6050	5790	27.5	163
RGI60-13.28211	29.797	88.269	6264	5557	6070	5860	15.9	310
RGI60-15.10994	29.796	82.733	6501	5107	6000	5640	11.9	42
RGI60-13.28263	29.762	88.269	6201	5670	6030	5890	19.5	286
RGI60-15.11003	29.753	82.799	6635	5185	6000	5670	12.1	30
RGI60-13.04474	29.6443	92.7125	5750	5286	5570	5460	14.5	251
RGI60-15.07886	29.584	101.916	7142	2984	5490	4490	24.4	99
RGI60-15.11839	29.554	96.134	5522	3866	5200	4670	18.9	37
RGI60-13.04524	29.5523	92.5739	5629	5414	5620	5540	11.1	291
RGI60-15.07889	29.546	101.927	6087	4171	5430	4930	27.3	68
RGI60-13.04529	29.5185	92.5948	5747	5297	5660	5510	17.1	317
RGI60-15.12500	29.377	96.463	6203	3293	5200	4440	28.3	179
RGI60-13.26374	28.942	90.154	6846	5153	6780	6130	32.2	304
RGI60-13.26283	28.939	90.197	7158	5269	6900	6250	25.6	119
RGI60-13.04188	28.8653	93.2041	5977	5055	5990	5620	20.4	52
RGI60-13.26304	28.856	90.22	6606	5056	6350	5830	21.6	18
RGI60-13.04192	28.844	93.2149	6017	4911	5740	5410	27.7	170
RGI60-15.04714	28.743	84.3926	6359	4481	6190	5510	15.8	317
RGI60-15.04833	28.717	83.2602	7347	4410	6600	5720	23.7	225
RGI60-15.01315	28.6773	93.4322	5452	4421	5100	4830	19.8	333
RGI60-15.04504	28.4792	84.2766	5465	4834	5340	5140	19.1	27
RGI60-15.08054	28.433	98.704	6400	3044	5400	4460	22.2	53
RGI60-15.10135	28.287	86.417	7180	5087	6070	5680	17.8	106
RGI60-15.04188	28.2519	85.2061	5623	4797	5470	5200	14.8	193
RGI60-15.10313	28.177	87.609	6398	5410	6090	5820	18.8	146
RGI60-15.01408	28.1752	92.8639	6104	4523	5650	5200	20.2	82
RGI60-15.04230	28.1626	85.8345	6656	3910	6100	5220	20.6	182
RGI60-15.04258	28.1587	85.7989	6793	3934	6100	5230	20.4	187
RGI60-15.01396	28.1567	92.8473	6335	4639	5980	5440	23	220
RGI60-15.02201	28.0692	91.3129	5540	5032	5460	5290	13.1	347
RGI60-15.09991	28.048	86.83	7947	5155	6400	5900	18.1	13
RGI60-15.02167	28.044	91.3316	5591	4545	5410	5060	13.4	167
RGI60-15.02231	28.021	90.4405	6146	4683	5730	5310	10.4	177
RGI60-15.02202	27.9782	91.609	6044	4871	5670	5350	16.6	34
RGI60-15.02052	27.9692	91.6311	5972	4729	5650	5280	21.2	118
RGI60-15.10972	27.945	88.86	7051	5460	6530	6100	20.2	35
RGI60-15.10342	27.925	87.887	6409	5226	5740	5530	15.4	46
RGI60-15.02897	27.9014	87.8975	6173	4894	5800	5440	16.1	196
RGI60-15.03052	27.8974	88.8514	6704	4482	5930	5350	20.4	230
RGI60-15.10942	27.858	89.293	6613	5275	5870	5630	31.6	336
RGI60-15.02235	27.842	89.3042	6303	4354	5600	5100	15.8	136
RGI60-15.02846	27.7998	88.1397	7120	4601	6010	5450	16.3	267
RGI60-15.02709	27.6615	88.0955	7967	4290	6000	5320	20.6	227
RGI60-15.03206	27.628	88.1546	7270	4176	6230	5410	19.4	94

## Sheet: Table S9
TABLE S9. Paleo ELA and ΔELA estimations
Glacier development in continental climate regions of central Asia
Jigjidsurengiin Batbaatar, Alan R. Gillespie, Michele Koppes, Douglas H. Clark, Oliver A. Chadwick, David Fink, Ari Matmon, Summer Rupper
corresponding author email: bataa@uw.edu
Site (Subregion)	Moraine group	Latitude/Longitude (decimal °N/°E)	Altitude (m asl)	Group mean age* (ka)	1σ total uncertainty† of the group age (ka)	Toe altitude (m asl)	Estimated ELA (m asl)	THAR value	ΔELA (m)	ΔELAnorm§	ELA method#	References
Kax Kurta (Altai)	Headwall	47.46170/89.88491	3090	-	-	-	-			-
	Kax Kurta-C	47.46111/89.79944	2560–2260	21.6 (?)	2.5	2260	2758	0.6	811.2	1	THAR=0.6	This study
	Kax Kurta-B	47.46855/89.81950	2540–2460	?	?	2460	2838	0.6	731.2	0.759036	THAR=0.6	This study
	Kax Kurta-A	47.46109/89.87250	2810–2790	17.3	2.4	2790	2970	0.6	599.2	0.361446	THAR=0.6	This study
	RGI60-10.02561	47.87945/90.02177	3856	0	0	3139	3569.2	0.6	0	-1.44337	THAR=0.6	RGI 6.0, 2017; This study
						Minimum ELA corresponding to the local LGM (m asl) ==>	2758
Kanas (Altai)	Headwall	49.11936/87.21318	3260	-	-	-	-			-
	Grib2018-B	48.69310/87.01430	1390–1380	21	2.6	1380	2508	0.6	508	1	THAR=0.6	Gribenski et al., 2018
	Grib2018-A	48.71110/87.02310	1390–1380	18.5	2.9	1380	2508	0.6	508	1	THAR=0.6	Gribenski et al., 2018
	RGI60-10.01460	49.11502/87.21350	3250–2665	0	0	2665	3016	0.6	0	0.324468	THAR=0.6	RGI 6.0, 2017; This study
						Minimum ELA corresponding to the local LGM (m asl) ==>	2508
Chagan Uzun (Altai)	Headwall	49.78780/87.72796	3620	-	-	-	-			-
	Grib2016-B	49.96234/88.13419	2235	25.4	9.4	-	2325	-	871	1	MELM	Gribenski et al., 2016
	Grib2016-C	49.94995/88.11057	2214	18.3	3.3	-	2325	-	871	1	MELM	Gribenski et al., 2016
	Grib2016-A	49.95213/88.08892	2399	19.1	2.4	-	2635	-	561	0.760618	MELM	Gribenski et al., 2016
	Grib2016-E	50.01659/88.35239	1990–1860	18.8	3.8	1860	2916	0.6	280	0.543629	THAR=0.6	Gribenski et al., 2016
	Reu2007-E	50.01300/88.29400	1980–1950	20.9	6.9	1950	2952	0.6	244	0.51583	THAR=0.6	Reuther, 2007
	Grib2016-D	49.97573/88.17863	1990-1970	19.4	3.6	1970	2960	0.6	236	0.509653	THAR=0.6	Gribenski et al., 2016
	RGI60-10.01836	49.79070/87.76070	3620–2560	0	0	2560	3196	0.6	0	0.327413	THAR=0.6	RGI 6.0, 2017; This study
						Minimum ELA corresponding to the local LGM (m asl) ==>	2325
Diehanjelegou (E Tian Shan)	Headwall	43.10699/87.41183	4040	-	-	-	-			-
	Diehanjelegou-C	43.15883/87.44098	3200–2990	30	12.9	2990	3620	0.6	252.8	1	THAR=0.6	This study
	Diehanjelegou-B	43.15751/87.45024	3170–3000	31.9	10.8	3000	3624	0.6	248.8	0.990476	THAR=0.6	This study
	RGI60-13.48197	43.10758/87.40946	4040–3622	0	0	3622	3872.8	0.6	0	0.398095	THAR=0.6	RGI 6.0, 2017; This study
						Minimum ELA corresponding to the local LGM (m asl) ==>	3620
Alashanje (E Tian Shan)	Headwall	43.03203/86.94117	4220	-	-	-	-			-
	Alashanje-min	42.88266/86.92311	3140–2950	?	?	2950	3712	0.6	337.2	1	THAR=0.6	This study
	Li2014-E	42.92100/86.92400	3290–3100	46.8	12.3	3100	3772	0.6	277.2	0.88189	THAR=0.6	Li et al., 2014; This study
	Alashanje	42.92695/86.87829	3280–3200	67.7	24.8	3200	3812	0.6	237.2	0.80315	THAR=0.6	This study
	Li2014-F	42.94100/86.89800	3400	76.1	11.2	3230	3824	0.6	225.2	0.779528	THAR=0.6	Li et al., 2014; This study
	Li2014-D	42.99300/86.91900	3477	25.8	5.2	3477	3922.8	0.6	126.4	0.585039	THAR=0.6	Li et al., 2014; This study
	Li2014-B	43.02800/86.92300	3515–3490	17.5	5.8	3490	3928	0.6	121.2	0.574803	THAR=0.6	Li et al., 2014; This study
	Li2014-C	42.99900/86.91700	3610	28.8	6.6	3610	3976	0.6	73.2	0.480315	THAR=0.6	Li et al., 2014; This study
	RGI60-13.48109	43.03500/86.94100	4220–3793	0	0	3793	4049.2	0.6	0	0.33622	THAR=0.6	RGI 6.0, 2017; This study
						Minimum ELA corresponding to the local LGM (m asl) ==>	3712
Daxigou (E Tian Shan)	Headwall	43.10466/86.80319	4150	-	-	-	-			-
	Daxigou-min	43.11206/86.98956	3170–2710	?	?	2710	3574	0.6	424	1	THAR=0.6	This study
	Li2011-D	43.11000/86.94500	3030–3005	19.3	3.6	2960	3674	0.6	324	0.826389	THAR=0.6	Li et al., 2011; This study
	Kong2009-C	43.11630/86.92920	3170–3120	17.7	2.5	3120	3738	0.6	260	0.715278	THAR=0.6	Kong et al., 2009
	Li2011-E	43.11900/86.92000	3210–3180	17.44	4.2	3180	3762	0.6	236	0.673611	THAR=0.6	Li et al., 2011; This study
	Kong2009a-A	43.11380/86.84280	3590–3520	19.6	5.4	3520	3898	0.6	100	0.4375	THAR=0.6	Kong et al., 2009; This study
	RGI60-13.45335	43.11100/86.81000	4150–3770	0	0	3770	3998	0.6	0	0.263889	THAR=0.6	RGI 6.0, 2017; This study
						Minimum ELA corresponding to the local LGM (m asl) ==>	3574
Takelekete (W Tian Shan)	Headwall	43.07423/83.56789	3765
	Zhan2016a-B	42.99170/83.58550	2910–2860	52	17.9	2860	3403	0.6	305.6	1	THAR=0.6	Zhang et al., 2016
	RGI60-13.44521	43.07500/83.57100	3765–3624	0	0	3624	3708.6	0.6	0	0.155801	THAR=0.6	RGI 6.0, 2017; This study
						Minimum ELA corresponding to the local LGM (m asl) ==>	3403
Muzart (W Tian Shan)	Headwall	42.11801/80.27217	6230	-	-	-	-			-
	Muzart-A	41.78571/80.90608	1910–1880	21.7	7	1880	4490	0.6	324.8	1	THAR=0.6	This study
	Muzart-B	41.77471/80.95658	2055–1950	16	2.6	1950	4518	0.6	296.8	0.983908	THAR=0.6	This study
	RGI60-13.43483	42.15600/80.33400	6230–2692	0	0	2692	4814.8	0.6	0	0.813333	THAR=0.6	RGI 6.0, 2017; This study
						Minimum ELA corresponding to the local LGM (m asl) ==>	4490
Tailan (W Tian Shan)	Headwall	42.02066/80.18038	5470	-	-	-	-			-
	Tailan-A	41.60856/80.49826	1690–1655	?	?	1655	3944	0.6	620.4	1	THAR=0.6	This study
	Hube2005-A	41.61900/80.47600	1745–1720	17.7	5.9	1720	3970	0.6	594.4	0.982962	THAR=0.6	Hubert-Ferrari et al., 2005
	RGI60-13.43267	42.00500/80.25100	5470–3206	0	0	3206	4564.4	0.6	0	0.593447	THAR=0.6	RGI 6.0, 2017; This study
						Minimum ELA corresponding to the local LGM (m asl) ==>	3944
Inylchek (W Tian Shan)	Headwall	42.06455/80.21891	5330
	Lift2014-I	41.96749/79.10616	2885–2500	145.3	39.3	2500	4198	0.6	160.4	1	THAR=0.6	Lifton et al., 2014
	Lift2014-D	42.02038/79.08981	2800–2700	16.4	6.4	2550	4218	0.6	140.4	0.982332	THAR=0.6	Lifton et al., 2014
	Lift2014-A	42.02238/79.07863	2650–2610	31.8	9.4	2600	4238	0.6	120.4	0.964664	THAR=0.6	Lifton et al., 2014
	RGI60-13.05000	42.06250/80.19330	5330–2901	0	0	2901	4358.4	0.6	0	0.858304	THAR=0.6	RGI 6.0, 2017; This study
						Minimum ELA corresponding to the local LGM (m asl) ==>	4198
Choktal (W Tian Shan)	Headwall	42.77621/76.69341	4470	-	-	-	-			-
	Choktal-min	42.66645/76.69000	2510–2490	?	?	2490	3678	0.6	505.6	1	THAR=0.6	This study
	Choktal river-A	42.70139/76.70089	3180–2600	22.2	3.7	2600	3722	0.6	461.6	0.944444	THAR=0.6	This study
	Choktal river-B	42.74965/76.69540	3545–3525	15.4	2.5	3525	4092	0.6	91.6	0.477273	THAR=0.6	This study
	Choktal river-C	42.74775/76.69392	3650–3560	0.3	0.1	3560	4106	0.6	77.6	0.459596	THAR=0.6	This study
	RGI60-13.10123	42.77544/76.69582	4470–3754	0	0	3754	4183.6	0.6	0	0.361616	THAR=0.6	RGI 6.0, 2017; This study
						Minimum ELA corresponding to the local LGM (m asl) ==>	3678
Barskoon-Suek (W Tian Shan)	Headwall	41.87271/77.68842	4180	-	-	-	-			-
	Blom-A	41.61920/77.72883	3419	89.5	17.8	3250	3808	0.6	260	1	THAR=0.6	Blomdin et al., 2016
	Blom-B	41.64029/77.85004	3501	25.7	8.2	3290	3824	0.6	244	0.956989	THAR=0.6	Blomdin et al., 2016
	Suek-A	41.70825/77.80538	3432	20.8	3	3432	3880.8	0.6	187.2	0.804301	THAR=0.6	This study
	Barskoon Suu-A	41.87017/77.73407	3390–3770	16.6	3.1	3770	4016	0.6	52	0.44086	THAR=0.6	This study
	Barskoon Suu-C	41.88323/77.70568	3785–3780	0.4	0.2	3780	4020	0.6	48	0.430108	THAR=0.6	This study
	RGI60-13.06827	41.87555/77.69468	4180–3900	0	0	3900	4068	0.6	0	0.301075	THAR=0.6	RGI 6.0, 2017; This study
						Minimum ELA corresponding to the local LGM (m asl) ==>	3808
Suek (W Tian Shan)	Headwall	41.78191/78.16933	4400	-	-	-	-			-
	Blom-A	41.61920/77.72883	3419	89.5	17.8	3250	3940	0.6	214	1	THAR=0.6	Blomdin et al., 2016
	Blom-B	41.64029/77.85004	3501	25.7	8.2	3290	3956	0.6	198	0.965217	THAR=0.6	Blomdin et al., 2016
	Suek-A	41.70825/77.80538	3432	20.8	3	3432	4012.8	0.6	141.2	0.841739	THAR=0.6	This study
	Blom-C	41.81677/78.11690	3790–3600	16.9	5.1	3600	4080	0.6	74	0.695652	THAR=0.6	Blomdin et al., 2016
	Blom-D	41.81433/78.11182	3730–3670	15.2	2.3	3670	4108	0.6	46	0.634783	THAR=0.6	Blomdin et al., 2016
	RGI60-13.07064	41.79322/78.16376	4400–3785	0	0	3785	4154	0.6	0	0.534783	THAR=0.6	RGI 6.0, 2017; This study
						Minimum ELA corresponding to the local LGM (m asl) ==>	3940
Gulbel (W Tian Shan)	Headwall	41.93756/77.21921	4280	-	-	-	-			-
	Gulbel pass-A	42.03892/77.12420	2980–2550	21.9	2.8	2550	3588	0.6	424.4	1	THAR=0.6	This study
	Kopp2008-A–B	42.03800/77.21900	3330–2875	37.5	9.8	2875	3718	0.6	294.4	0.812139	THAR=0.6	Koppes et al., 2008
	Gulbel pass-C	42.01432/77.19927	3310–3240	17.3	3	3060	3792	0.6	220.4	0.705202	THAR=0.6	This study
	Gulbel pass-D	42.01147/77.19960	3275–3245	16.8	2.8	3245	3866	0.6	146.4	0.598266	THAR=0.6	This study
	RGI60-13.09143	41.94801/77.21979	4280–3611	0	0	3611	4012.4	0.6	0	0.386705	THAR=0.6	RGI 6.0, 2017; This study
						Minimum ELA corresponding to the local LGM (m asl) ==>	3588
Ala Bash (W Tian Shan)	Headwall	41.98920/76.39711	3890
	Kopp2008-K	42.09400/76.46100	2165–2125	102.1	15	2125	3184	0.6	595.6	1	THAR=0.6	Koppes et al., 2008
	Kopp2008-I	42.08000/76.45800	2880–2180	68.2	9.4	2180	3206	0.6	573.6	0.968839	THAR=0.6	Koppes et al., 2008
	Kopp2008-J	42.08900/76.46600	2355–2190	142.1	25.7	2190	3210	0.6	569.6	0.963173	THAR=0.6	Koppes et al., 2008
	Kopp2008-L	42.06400/76.44300	2880–2660	72.2	30.5	-	3380	-	399.6	0.72238	MELM	Koppes et al., 2008
	RGI60-13.09249	41.99266/76.39944	3890–3614	0	0	3614	3779.6	0.6	0	0.156374	THAR=0.6	RGI 6.0, 2017; This study
						Minimum ELA corresponding to the local LGM (m asl) ==>	3184
At Bashi (W Tian Shan)	Headwall	41.02972/76.03060	4320
	At Bashi-min	40.75447/75.53657	3630–3560	?	?	3560	4016	0.6	170.4	1	THAR=0.6	This study
	Zec2012-B	40.78740/75.47280	4020–3800	19.1	3.9	-	4020	-	166.4	0.986842	MELM	Zech, 2012
	Zec2012-C	40.76500/75.50250	3685–3625	64.8	9	3625	4042	0.6	144.4	0.914474	THAR=0.6	Zech, 2012
	Zec2012-A	40.78270/75.48760	3845–3855	16.4	2.9	3855	4134	0.6	52.4	0.611842	THAR=0.6	Zech, 2012
	RGI60-13.10354	40.98173/75.80253	4654–3986	0	0	3986	4186.4	0.6	0	0.439474	THAR=0.6	RGI 6.0, 2017; This study
						Minimum ELA corresponding to the local LGM (m asl) ==>	4016
Altyn Tagh (Qilian Shan)	Headwall	39.29904/93.74684	5490	-	-	-	-			-
	Altyn-Tagh-min (?)	39.32046/93.74070	4310–4260	MIS 2 (?)	?	4350	5034	0.6	46.8	1	THAR=0.6	This study
	Altyn-Tagh-A	39.31450/93.74186	4450–4408	>1.4 (?)	-	4408	5057.2	0.6	23.6	0.949123	THAR=0.6	This study
	RGI60-13.33340	39.30500/93.74400	5490–4467	0	0	4467	5080.8	0.6	0	0.897368	THAR=0.6	RGI 6.0, 2017; This study
						Minimum ELA corresponding to the local LGM (m asl) ==>	5034
Dumda (Qilian Shan)	Headwall	38.09836/96.41447	5245	-	-	-	-			-
	Dumda-A	37.85994/96.28808	4075–4040	131.5	19.2	4040	4763	0.6	296	1	THAR=0.6	This study
	Dumda-B	37.94356/96.35546	4430–4340	?	?	4340	4883	0.6	176	0.751037	THAR=0.6	This study
	RGI60-13.35425	38.06800/96.41900	5245–4780	0	0	4780	5059	0.6	0	0.385892	THAR=0.6	RGI 6.0, 2017; This study
						Minimum ELA corresponding to the local LGM (m asl) ==>	4763
Gangshiqia (Qilian Shan)	Headwall	37.69763/101.49482	5030	-	-	-	-			-
	Qilian Shan-B	37.66050/101.42356	3620–3530	14	2.4	-	3680	-	1086.8	1	MELM	This study
	Qilian Shan-A	37.66339/101.42669	3710–3570	18.2	2.6	-	3710	-	1056.8	0.977778	MELM	This study
	Qilian Shan-D	37.69356/101.45208	4320–4080	11.7	4.9	-	4320	-	446.8	0.525926	MELM	This study
	RGI60-13.23977	37.70100/101.48600	5030–4372	0	0	4372	4766.8	0.6	0	0.194963	THAR=0.6	RGI 6.0, 2017; This study
						Minimum ELA corresponding to the local LGM (m asl) ==>	3680
Laolongwan (Qilian Shan)	Headwall	37.52571/101.78778	4520	-	-	-	-			-
	Owen2003d-A	37.44100/101.76200	3360–3340	11	1.4	3340	4048	0.6	425.2	1	THAR=0.6	Owen et al., 2003b
	Owen2003d-E	37.46000/101.76600	3460	19.2	2.5	3460	4096	0.6	377.2	0.898305	THAR=0.6	Owen et al., 2003b
	RGI60-13.24015	37.52400/101.78700	4520–4403	?	?	4403	4473.2	0.6	0	0.0991525	THAR=0.6	RGI 6.0, 2017; This study
						Minimum ELA corresponding to the local LGM (m asl) ==>	4048
Haiyuan (Qilian Shan)	Headwall	37.50956/101.81563	4580	-	-	-	-			-
	Qilian Shan-3A	37.53946/101.85044	3790–3590	?	?	-	3790	-	620	1	MELM	This study
	Lass2002-A	37.53300/101.84900	4000–3830	9.5	5.6	-	4000	-	410	0.734177	MELM	Lasserre et al., 2002
	RGI60-13.31354	37.51300/101.81700	4580–4155	0	0	4155	4410	0.6	0	0.21519	THAR=0.6	RGI 6.0, 2017; This study
						Minimum ELA corresponding to the local LGM (m asl) ==>	3790
La Ji (Qilian Shan)	Headwall	36.30630/101.27334	4730	-	-	-	-			-
	Qilian Shan-4A	36.35885/101.35535	3770–3710	?	?	3710	4322	0.6	1278	1	THAR=0.6	This study
	Owen2003c-C	36.37000/101.31200	4000–3920	25.4	4.9	3920	4406	0.6	1194	0.794118	THAR=0.6	Owen et al., 2003a
	RGI60-13.23909	34.73500/99.542000	6198–4520	0	0	4520	5600	0.6	0	-2.13235	THAR=0.6	RGI 6.0, 2017; This study
						Minimum ELA corresponding to the local LGM (m asl) ==>	4322
Mawang Kangri (Inner Tibet)	Headwall	34.31438/80.04106	6365	-	-	-	-			-
	Amid2013-C	34.42557/80.04985	5330–5285	?	?	5285	5933	0.6	67.6	1	THAR=0.6	Amidon et al., 2013
	Amid2013-B	34.42230/80.04760	5300–5290	91.9	11.5	5290	5935	0.6	65.6	0.99537	THAR=0.6	Amidon et al., 2013
	Amid2013-A	34.41270/80.04640	5340–5320	62.7	14.9	5320	5947	0.6	53.6	0.967593	THAR=0.6	Amidon et al., 2013
	RGI60-13.53522	34.33800/80.04600	6365–5454	0	0	5454	6000.6	0.6	0	0.843519	THAR=0.6	RGI 6.0, 2017; This study
						Minimum ELA corresponding to the local LGM (m asl) ==>	5933
Aksaiqin (W Kunlun)	Headwall	35.50944/80.40755	6350	-	-	-	-			-
	Aksaiqin-min (?)	35.37847/80.31855	5270–5230	?	?	5230	5902	0.6	96.4	1	THAR=0.6	This study
	Aksaiqin-A	35.39662/80.34292	5400–5390	31.1	13	5390	5966	0.6	32.4	0.857143	THAR=0.6	This study
	Aksaiqin-B	35.39718/80.36552	5440–5410	> 29 (?)	?	5410	5974	0.6	24.4	0.839286	THAR=0.6	This study
	RGI60-13.53668	35.45700/80.38900	6350–5471	0	0	5471	5998.4	0.6	0	0.784821	THAR=0.6	RGI 6.0, 2017; This study
						Minimum ELA corresponding to the local LGM (m asl) ==>	5902
Karakax-A (W Kunlun)	Headwall	36.49935/77.63702	6020	-	-	-	-			-
	Karakax-A	36.43685/77.68216	5030–4840	90.2	12	-	5030	-	690.4	1	MELM	This study
	RGI60-13.40102	36.50000/77.66800	6020–5271	0	0	5271	5720.4	0.6	0	0.302626	THAR=0.6	RGI 6.0, 2017; This study
						Minimum ELA corresponding to the local LGM (m asl) ==>	5030
Karakax-B (W Kunlun)	Headwall	36.49193/77.60021	6080	-	-	-	-			-
	Karakax-B-min	36.41326/77.63702	4740–4700	?	?	4700	5528	0.6	190.4	1	THAR=0.6	This study
	Karakax-B2	36.43024/77.65266	5100-5000	88.7	16.9	4990	5644	0.6	74.4	0.789855	THAR=0.6	This study
	Karakax-B3	36.42616/77.64395	5130–5080	80.7	13.3	5080	5680	0.6	38.4	0.724638	THAR=0.6	This study
	RGI60-13.40092	36.48000/77.63000	6080–5176	0	0	5176	5718.4	0.6	0	0.655072	THAR=0.6	RGI 6.0, 2017; This study
						Minimum ELA corresponding to the local LGM (m asl) ==>	5528
Gichginii range (Gob-Altai)	Headwall	45.40005/97.07027	3440	-	-	-	-			-
	Moraine G1	45.40310/97.07100	3290–3320	?	?	3290	3320	-	425.4	1	MELM	Batbaatar et al., 2018
	Batb2018-A	45.40390/97.07030	3297–3330	7.4	1.3	3297	3330	-	415.4	0.916667	MELM	Batbaatar et al., 2018
	Batb2018-B	45.40150/97.06970	3310–3360	2.5	0.8	3310	3360	-	385.4	0.666667	MELM	Batbaatar et al., 2018
	Batb2018-C	45.40120/97.06970	3320–3365	1.4	0.6	3320	3365	-	380.4	0.625	MELM	Batbaatar et al., 2018
	Moraine G5	45.40180/97.06870	3335–3370	?	?	3335	3370	-	375.4	0.583333	MELM	Batbaatar et al., 2018
	RGI60-10.02900 (Sutai)	46.63943/93.54810	3670–3980	0	0	3670	3745.4	0.58	0	-2.545	THAR=0.58	RGI 6.0, 2017; This study
						Minimum ELA corresponding to the local LGM (m asl) ==>	3320
Sutai range, NE (Gobi-Altai)	Headwall	46.63358/93.55765	3800	-	-	-	-			-
	Moraine N1	46.64180/93.57100	3110–3220	?	?	3110	3510.2	0.58	235.2	1	THAR=0.58	Batbaatar et al., 2018
	Batb2018-E	46.64180/93.56590	3240–3315	24.2	4.3	3245	3566.9	0.58	178.5	0.804348	THAR=0.58	Batbaatar et al., 2018
	RGI60-10.02900	46.63943/93.54810	3670–3980	0	0	3670	3745.4	0.58	0	0.188406	THAR=0.58	RGI 6.0, 2017; This study
						Minimum ELA corresponding to the local LGM (m asl) ==>	3510.2
Sutai range, SW (Gobi-Altai)	Headwall	46.62312/93.59323	4100	-	-	-	-			-
	Bedrock	46.60120/93.54900	3105	> 22 (?)	-	?	?		#VALUE!	?		Batbaatar et al., 2018
	Batb2018-J	46.61320/93.55030	3238–3275	15.9	3.8	-	3275	-	591.9	1	MELM	Batbaatar et al., 2018
	RGI60-10.02893	46.62310/93.59320	3545–4200	0	0	3545	3866.9	0.58	0	0.282545	THAR=0.58	RGI 6.0, 2017; This study
						Minimum ELA corresponding to the local LGM (m asl) ==>	3275
Ih Bogd range (Gobi-Altai)	Headwall	44.95975/100.26923	3500	-	-	-	-
	Moraine IB1	44.95590/100.26390	3325–3365	?	?	3325	3426.5	0.58	564.5	1	THAR=0.58	Batbaatar et al., 2018
	Batb2018-K	44.95630/100.26680	3380–3430	14	3.4	3380	3449.6	0.58	541.4	0.685714	THAR=0.58	Batbaatar et al., 2018
	RGI60-10.02898 (Sutai)	46.61224/93.60343	4180–3730	0	0	3730	3991	0.58	0	-6.68027	THAR=0.58	RGI 6.0, 2017; This study
						Minimum ELA corresponding to the local LGM (m asl) ==>	3426.5
Otgontenger, Bogd (Hangai)	Headwall	47.60961/97.54489	3400	-	-	-	-
	Roth2014b-E	47.68350/97.20980	2140	42.7	5.9	2070	2841.4	0.58	997.9	1	THAR=0.58	Rother et al., 2014
	Roth2014b-A	47.68330/97.20670	2070–2150	19.6	5.5	2070	2841.4	0.58	997.9	1	THAR=0.58	Rother et al., 2014; Batbaatar et al., 2018
	Roth2014b-B	47.68830/97.24960	2085–2150	19.8	3.2	2150	2875	0.58	964.3	0.93985	THAR=0.58	Rother et al., 2014
	RGI60-10.02907	47.60800/97.55230	3645–3980	0	0	3645	3839.3	0.58	0	-0.78643	THAR=0.58	RGI 6.0, 2017; This study
						Minimum ELA corresponding to the local LGM (m asl) ==>	2841.4
Otgontenger, Bitüüt (Hangai)	Headwall	47.65663/97.59901	3100	-	-	-	-
	Moraine BI1	47.57210/97.67510	2510–2555	?	?	2510	2852.2	0.58	987.1	1	THAR=0.58	Batbaatar et al., 2018
	Batb2018-M	47.57550/97.66770	2525–2610	30	4	2525	2858.5	0.58	980.8	0.974576	THAR=0.58	Batbaatar et al., 2018
	Batb2018-O	47.60350/97.64050	2721–2730	16.3	2.1	2721	2940.82	0.58	898.48	0.642373	THAR=0.58	Batbaatar et al., 2018
	RGI60-10.02907	47.60800/97.55230	3645–3980	0	0	3645	3839.3	0.58	0	-2.98345	THAR=0.58	RGI 6.0, 2017; This study
						Minimum ELA corresponding to the local LGM (m asl) ==>	2852.2
Bumbat valley (Hangai)	Headwall	47.29765/100.46943	3250	-	-	-	-
	Moraine BU1	47.43550/100.34710	2110–2210	>> 22 (?)	-	2110	2771.2	0.58	1068.1	1	THAR=0.58	Batbaatar et al., 2018
	Batb2018-Q	47.41800/100.35250	2135–2220	34.3	7.6	2135	2781.7	0.58	1057.6	0.97807	THAR=0.58	Batbaatar et al., 2018
	RGI60-10.02907	47.60800/97.55230	3645–3980	0	0	3645	3839.3	0.58	0	-1.23079	THAR=0.58	RGI 6.0, 2017; This study
						Minimum ELA corresponding to the local LGM (m asl) ==>	2771.2
Baikal	Headwall	51.29832/105.18027	2100	-	-	-	-
	Hori2004-A	51.50000/104.90000	500	15.1	4.5	500	1428	0.58	1759.96	1	THAR=0.58	Horiuchi et al., 2004
	RGI60-10.02911	51.72290/100.60045	3431–2978	0	0	2978	3187.96	0.58	0	-1.61899	THAR=0.58	RGI 6.0, 2017; This study
						Minimum ELA corresponding to the local LGM (m asl) ==>	1428
Ama Drime (E Himalaya)	Headwall	28.17317/87.59605	6130	-	-	-	-
	Ama Dime-min (?)	28.11033/87.69552	4800	MIS 3 (?)	?	4800	5598	0.6	318.8	1	THAR=0.6	This study
	Chev2011-T	28.13100/87.67100	5006	27.4	4.2	4940	5654	0.6	262.8	0.894737	THAR=0.6	Chevalier et al., 2011
	Chev2011-S	28.14600/87.65300	5151	17.8	3.1	5040	5694	0.6	222.8	0.819549	THAR=0.6	Chevalier et al., 2011
	Chev2011-R	28.15000/87.65100	5223	19.4	3.3	5040	5694	0.6	222.8	0.819549	THAR=0.6	Chevalier et al., 2011
	RGI60-15.10593	28.16400/87.59500	6292–5597	0	0	5597	5916.8	0.6	0	0.400752	THAR=0.6	RGI 6.0, 2017; This study
						Minimum ELA corresponding to the local LGM (m asl) ==>	5598
Bayan Har Shan-1 (Inner Tibet)	Headwall	34.25862/97.62143	5130	-	-	-	-
	Heym2011-J	33.87692/97.23156	4501	52.3	7.5	4500	4878	0.6	650.4	1	THAR=0.6	Heyman et al., 2011
	Heym2011-M	33.96478/97.32528	4560	154.3	27.3	4560	4902	0.6	626.4	0.904762	THAR=0.6	Heyman et al., 2011
	Heym2011-C	33.98667/97.44905	4573	13.9	2.5	4573	4907.2	0.6	621.2	0.884127	THAR=0.6	Heyman et al., 2011
	RGI60-13.23950	34.77100/99.46100	6058–4926	0	0	4926	5528.4	0.6	0	-1.58095	THAR=0.6	RGI 6.0, 2017; This study
						Minimum ELA corresponding to the local LGM (m asl) ==>	4878
Bayan Har Shan-2 (Inner Tibet)	Headwall	34.25862/97.62143	5130	-	-	-	-
	Heym2011-G	34.15697/98.02033	4590	57.2	10	4590	4914	0.6	602	1	THAR=0.6	Heyman et al., 2011
	Heym2011-O	34.16431/98.13153	4646	34.3	8	4650	4938	0.6	578	0.888889	THAR=0.6	Heyman et al., 2011
	Heym2011-L	34.15606/97.70853	4657	23.5	3.3	4660	4942	0.6	574	0.87037	THAR=0.6	Heyman et al., 2011
	RGI60-13.23886	34.83600/99.46000	6252–4462	0	0	4460	5516	0.6	0	-1.78704	THAR=0.6	RGI 6.0, 2017; This study
						Minimum ELA corresponding to the local LGM (m asl) ==>	4914
Bayan Har Shan-3 (Inner Tibet)	Headwall	34.25862/97.62143	5130	-	-	-	-
	Heym2011-D	34.60492/98.01506	4248	69.3	14	4250	4778	0.6	738	1	THAR=0.6	Heyman et al., 2011
	Heym2011-E	34.52578/97.98753	4332	57.3	12.2	4330	4810	0.6	706	0.909091	THAR=0.6	Heyman et al., 2011
	Heym2011-I	34.39153/97.75956	4509	71.3	10.3	4510	4882	0.6	634	0.704545	THAR=0.6	Heyman et al., 2011
	Heym2011-N	34.33731/97.60611	4546	57.8	7.5	4550	4898	0.6	618	0.659091	THAR=0.6	Heyman et al., 2011
	RGI60-13.23886	34.83600/99.46000	6252–4462	0	0	4460	5516	0.6	0	-1.09659	THAR=0.6	RGI 6.0, 2017; This study
						Minimum ELA corresponding to the local LGM (m asl) ==>	4778
Borohoro-1 (E Tian Shan)	Headwall	43.73968/84.36614	3910	-	-	-	-
	Borohoro-1_min	43.81986/84.47217	2320	?	?	2320	3274	0.6	470	1	THAR=0.6	This study
	Li2016-B	43.73870/84.40320	3477	0.3	0.1	3400	3706	0.6	38	0.320755	THAR=0.6	Li et al., 2016
	RGI60-13.47247	43.73100/84.39100	3901–3495	0	0	3495	3744	0.6	0	0.261006	THAR=0.6	RGI 6.0, 2017; This study
						Minimum ELA corresponding to the local LGM (m asl) ==>	3274
Borohoro-2 (E Tian Shan)	Headwall	43.25063/84.87091	3690	-	-	-	-
	Zhan2016a-D	43.17630/84.88080	2871	58.7	10.6	2730	3306	0.6	522	1	THAR=0.6	Zhang et al., 2016
	RGI60-13.29827	43.45800/84.78500	4094–3573	0	0	3570	3828	0.6	0	-0.359375	THAR=0.6	RGI 6.0, 2017; This study
						Minimum ELA corresponding to the local LGM (m asl) ==>	3306
Borohoro-3 (E Tian Shan)	Headwall	43.19631/85.76349	4140	-	-	-	-
	Borohoro-2_min	43.10803/85.62103	2955	?	?	2970	3672	0.6	492.8	1	THAR=0.6	This study
	Zhan2016a-F	43.11690/85.75960	3159	18.3	5.2	3160	3748	0.6	416.8	0.837607	THAR=0.6	Zhang et al., 2016
	RGI60-13.44596	43.23100/85.46400	4504–3737	0	0	3737	4164.8	0.6	0	-0.0529915	THAR=0.6	RGI 6.0, 2017; This study
						Minimum ELA corresponding to the local LGM (m asl) ==>	3672
Chuluut (Hangai)	Headwall	47.14022/100.08214	3480	-	-	-	-
	Smit2016-C	47.41260/100.25660	2274	22.8	3.3	2270	2983.4	0.58	855.9	1	THAR=0.58	Smith et al., 2016
	RGI60-10.02907	47.60800/97.55230	3645–3980	0	0	3645	3839.3	0.58	0	-2.98345	THAR=0.58	RGI 6.0, 2017; This study
						Minimum ELA corresponding to the local LGM (m asl) ==>	2983.4
Cho Oyu (E Himalaya)	Headwall	28.08364/86.65164	6680	-	-	-	-
	Cho Oyu min	28.40828/86.64946	4660	?	?	4660	5872	0.6	194	1	THAR=0.6	This study
	Chev2011-U	28.34800/86.62700	4948	33.2	5.2	4900	5968	0.6	98	0.881188	THAR=0.6	Chevalier et al., 2011
	RGI60-15.10147	28.12100/86.59000	8181–5145	0	0	5145	6066	0.6	0	0.759901	THAR=0.6	RGI 6.0, 2017; This study
						Minimum ELA corresponding to the local LGM (m asl) ==>	5872
Gyalgar (Hangai)	Headwall	48.22352/98.80971	3070	-	-	-	-
	BatGil2016-L	48.11805/98.81583	2253	19.6	4.7	2250	2725.6	0.58	1113.7	1	THAR=0.58	Batbaatar and Gillespie, 2016
	BatGil2016-N	48.18288/98.80468	2585	22.8	4.4	2430	2801.2	0.58	1038.1	0.780488	THAR=0.58	Batbaatar and Gillespie, 2016
	BatGil2016-K	48.18377/98.78145	2472	21.9	4.1	2430	2801.2	0.58	1038.1	0.780488	THAR=0.58	Batbaatar and Gillespie, 2016
	RGI60-10.02907	47.60800/97.55230	3645–3980	0	0	3645	3839.3	0.58	0	-2.23374	THAR=0.58	RGI 6.0, 2017; This study
						Minimum ELA corresponding to the local LGM (m asl) ==>	2725.6
Hogyin (Darhad)	Headwall	50.9046/98.45774	2650	-	-	-	-
	Gill2008-F	51.00600/99.12500	1716	125.2	26.8	1680	2242.6	0.58	945.36	1	THAR=0.58	Gillespie et al., 2008
	Gill2008-G	50.98100/99.15200	1679	22.4	9.3	1680	2242.6	0.58	945.36	1	THAR=0.58	Gillespie et al., 2008
	RGI60-10.02911	51.72290/100.60045	3431–2978	0	0	2978	3187.96	0.58	0	-1.32047	THAR=0.58	RGI 6.0, 2017; This study
						Minimum ELA corresponding to the local LGM (m asl) ==>	2242.6
Hoh lake (Hangai)	Headwall	47.54828/98.34070	3470	-	-	-	-
	Hoh lake min	47.42426/98.57352	2540	?	?	2540	3079.4	0.58	759.9	1	THAR=0.58	This study
	Smit2016-B	47.46310/98.56910	2676	43.6	9.5	2670	3134	0.58	705.3	0.860215	THAR=0.58	Smith et al., 2016
	RGI60-10.02907	47.60800/97.55230	3645–3980	0	0	3645	3839.3	0.58	0	-0.945469	THAR=0.58	RGI 6.0, 2017; This study
						Minimum ELA corresponding to the local LGM (m asl) ==>	3079.4
Hoit Aguy (Sayan)	Headwall	51.57306/98.67007	2750	-	-	-	-
	BatGil2016-H	51.55206/98.71469	2332	34.4	4.8	2140	2493.8	0.58	694.16	1	THAR=0.58	Batbaatar and Gillespie, 2016
	RGI60-10.02911	51.72290/100.60045	3431–2978	0	0	2978	3187.96	0.58	0	-1.70945	THAR=0.58	RGI 6.0, 2017; This study
						Minimum ELA corresponding to the local LGM (m asl) ==>	2493.8
Jarai (Darhad)	Headwall	51.64175/99.91152	2620	-	-	-	-
	Gill2008-D	51.39957/99.77220	1633	25.2	11.4	1630	2204.2	0.58	983.76	1	THAR=0.58	Gillespie et al., 2008
	Gill2008-E	51.39935/99.79990	1676	19.7	3.2	1670	2221	0.58	966.96	0.959596	THAR=0.58	Gillespie et al., 2008
	RGI60-10.02911	51.72290/100.60045	3431–2978	0	0	2978	3187.96	0.58	0	-1.36595	THAR=0.58	RGI 6.0, 2017; This study
						Minimum ELA corresponding to the local LGM (m asl) ==>	2204.2
Jombolok (Sayan)	Headwall	52.68309/98.94914	2650	-	-	-	-
	Arzh2012-B	52.75221/99.70855	1288	24.9	4.9	1280	2074.6	0.58	656.6	1	THAR=0.58	Arzhannikov et al., 2012
	Arzh2012-C	52.74003/99.63303	1410	26.1	4	1280	2074.6	0.58	656.6	1	THAR=0.58	Arzhannikov et al., 2012
	BatGil2016-E	52.73107/99.61505	1410	20.9	4.1	1280	2074.6	0.58	656.6	1	THAR=0.58	Batbaatar and Gillespie, 2016
	RGI60-10.02962	52.50381/98.81916	3029–2362	0	0	2360	2731.2	0.58	0	-0.141119	THAR=0.58	RGI 6.0, 2017; This study
						Minimum ELA corresponding to the local LGM (m asl) ==>	2074.6
Kailas (C Himalaya)	Headwall	31.11871/81.38241	5810	-	-	-	-
	Chev2011-Y	31.00800/81.24000	4800	46.5	19.2	4650	5346	0.6	352	1	THAR=0.6	Chevalier et al., 2011
	Chev2011-X	30.99400/81.25600	4793	17.4	4.9	4700	5366	0.6	332	0.956897	THAR=0.6	Chevalier et al., 2011
	RGI60-14.27874	31.12100/81.38300	6021–5531	0	0	5530	5698	0.6	0	0.241379	THAR=0.6	RGI 6.0, 2017; This study
						Minimum ELA corresponding to the local LGM (m asl) ==>	5346
Kalurong (Inner Tibet)	Headwall	28.94196/90.16749	6830	-	-	-	-
	Kalurong min	28.95499/90.11634	4820	?	?	4820	6026	0.6	132	1	THAR=0.6	This study
	Liu2017-C	28.95000/90.13500	4988	21.6	2.9	4988	6093.2	0.6	64.8	0.916418	THAR=0.6	Liu et al., 2017
	Liu2017-D	28.94900/90.13400	5017	16.7	2.4	4988	6093.2	0.6	64.8	0.916418	THAR=0.6	Liu et al., 2017
	RGI60-13.26374	28.94200/90.15400	6846–5153	0	0	5150	6158	0.6	0	0.835821	THAR=0.6	RGI 6.0, 2017; This study
						Minimum ELA corresponding to the local LGM (m asl) ==>	6026
Menyuan (E Tibet)	Headwall	35.52433/102.70265	4520	-	-	-	-
	Wang2013-A	35.57510/102.74390	3614	26.5	3.6	-	3850	-	1141.6	1	MELM	Wang et al., 2013
	Wang2013-B	35.56920/102.73950	3719	51.1	14.5	-	3850	-	1141.6	1	MELM	Wang et al., 2013
	Wang2013-C	35.56910/102.73560	3680	24.9	4.9	3420	4080	0.6	911.6	0.656716	THAR=0.6	Wang et al., 2013
	Wang2013-D	35.58290/102.72710	3304	19.7	3.8	3420	4080	0.6	911.6	0.656716	THAR=0.6	Wang et al., 2013
	RGI60-13.23874	33.29300/101.10800	5295-4679	0	0	4679	4991.6	0.6	0	-0.703881	THAR=0.6	RGI 6.0, 2017; This study
						Minimum ELA corresponding to the local LGM (m asl) ==>	3850
Mönh-Saridag (Sayan)	Headwall	51.72290/100.60045	3340	-	-	-	-
	Mönh-Saridag min	52.08062/100.36462	1600	> MIS 2 (?)	?	1600	2609.2	0.58	578.76	1	THAR=0.58	This study
	BatGil2016-D	51.73867/100.60086	2640	26.9	3.7	2590	3025	0.58	162.96	0.431034	THAR=0.58	Batbaatar and Gillespie, 2016
	BatGil2016-A	51.73609/100.59985	2640	12.1	1.6	2630	3041.8	0.58	146.16	0.408046	THAR=0.58	Batbaatar and Gillespie, 2016
	BatGil2016-B	51.73092/100.60073	2800	10.1	1.8	2730	3083.8	0.58	104.16	0.350575	THAR=0.58	Batbaatar and Gillespie, 2016
	BatGil2016-C	51.72860/100.59832	2900	1.3	0.3	2840	3130	0.58	57.96	0.287356	THAR=0.58	Batbaatar and Gillespie, 2016
	RGI60-10.02911	51.72290/100.60045	3431–2978	0	0	2978	3187.96	0.58	0	0.208046	THAR=0.58	RGI 6.0, 2017; This study
						Minimum ELA corresponding to the local LGM (m asl) ==>	2609.2
Nyainqentanghla (Inner Tibet)	Headwall	29.90656/90.03821	5850	-	-	-	-
	Nyainqentanghla min	29.80792/90.03907	4700	?	?	4700	5390	0.6	206.8	1	THAR=0.6	This study
	Dong2017a-A	29.85056/90.06389	4940	19.6	4.4	4850	5450	0.6	146.8	0.869565	THAR=0.6	Dong et al., 2017a
	Dong2017a-B	29.84264/90.06400	4840	20.3	4.5	4800	5430	0.6	166.8	0.913043	THAR=0.6	Dong et al., 2017a
	RGI60-13.28457	29.91200/90.04000	6693–5217	0	0	5217	5596.8	0.6	0	0.550435	THAR=0.6	RGI 6.0, 2017; This study
						Minimum ELA corresponding to the local LGM (m asl) ==>	5390
Sailag (Sayan)	Headwall	52.84551/99.68752	2780	-	-	-	-
	Arzh2012-D	52.77712/99.71842	1355	17.8	6.5	1355	2181.5	0.58	550.54	1	THAR=0.58	Arzhannikov et al., 2012; Batbaatar and Gillespie, 2016
	RGI60-10.02962	52.50381/98.81916	3029–2362	0	0	2362	2732.04	0.58	0	0.0801337	THAR=0.58	RGI 6.0, 2017; This study
						Minimum ELA corresponding to the local LGM (m asl) ==>	2181.5
Tanggula Shan-1 (Inner Tibet)	Headwall	32.82702/91.98870	5690	-	-	-	-
	Schä2002-E	32.93200/91.96600	5198	75.2	24.9	5145	5472	0.6	52	1	THAR=0.6	Schäfer, 2000; Colgan et al., 2006
	RGI60-13.24560	32.83500/91.97200	5775–5275	0	0	5275	5524	0.6	0	0.761468	THAR=0.6	RGI 6.0, 2017; This study
						Minimum ELA corresponding to the local LGM (m asl) ==>	5472
Tanggula Shan-2 (Inner Tibet)	Headwall	32.82305/91.95122	5535	-	-	-	-
	Owen2005-M	32.82033/91.88920	5050	98.9	53	5050	5341	0.6	235	1	THAR=0.6	Owen et al., 2005
	Owen2005-L	32.82765/91.90705	5100	57.5	9.4	5100	5361	0.6	215	0.896907	THAR=0.6	Owen et al., 2005
	RGI60-13.49424	32.81300/91.95500	5718–5391	0	0	5390	5576	0.6	0	-0.21134	THAR=0.6	RGI 6.0, 2017; This study
						Minimum ELA corresponding to the local LGM (m asl) ==>	5341
Tangra Yum Co (Inner Tibet)	Headwall	32.82702/91.98870	6210	-	-	-	-
	Tangra Yum Co min	30.67241/86.53905	5090	?	?	-	5200	-	811.2	1	MELM	This study
	Rade2015-C	30.67574/86.53188	5160	19.5	2.9	-	5600	-	411.2	0.60396	MELM	Rades et al., 2015
	RGI60-13.50116	30.66900/86.47700	6344–5713	0	0	5713	6011.2	0.6	0	0.196832	THAR=0.6	RGI 6.0, 2017; This study
						Minimum ELA corresponding to the local LGM (m asl) ==>	5200
Tengis (Sayan)	Headwall	52.04949/99.08284	2750	-	-	-	-
	BatGil2016-I	51.45358/99.03870	1630	21.9	3.6	1630	2279.6	0.58	1049	1	THAR=0.58	Batbaatar and Gillespie, 2016
	Gill2008-A	51.47922/99.05553	1645	22.2	3.4	1630	2279.6	0.58	1049	1	THAR=0.58	Gillespie et al., 2008
	RGI60-10.02915	51.71783/100.60229	3405–3230	0	0	3230	3328.6	0.58	0	-1.23002	THAR=0.58	RGI 6.0, 2017; This study
						Minimum ELA corresponding to the local LGM (m asl) ==>	2279.6
Karlik Shan (E Tian Shan)	Headwall	43.09262/94.31996	4530	-	-	-	-
	Karlik Shan min	43.22553/94.40281	2430	>23 ka (?)	-	2430	3690	0.6	482.8	1	THAR=0.6	Chen et al., 2015; This study
	Chen2015-B	43.14300/94.38030	3330	14.5	1.9	3190	3994	0.6	178.8	0.638095	THAR=0.6	Chen et al., 2015
	RGI60-13.45052	43.10600/94.32600	4713–3637	0	0	3637	4172.8	0.6	0	0.425238	THAR=0.6	RGI 6.0, 2017; This study
						Minimum ELA corresponding to the local LGM (m asl) ==>	3690
W Himalaya	Headwall	32.42909/79.57832	5870	-	-	-	-
	Chev2011-AB	32.48522/79.66877	4310	152	41.9	4280	5234	0.6	566.8	1	THAR=0.6	Chevalier et al., 2011
	Chev2011-AD	32.48655/79.64740	4500	59.1	27.2	4380	5274	0.6	526.8	0.937107	THAR=0.6	Chevalier et al., 2011
	Chev2011-AC	32.48998/79.64917	4440	89.1	22.6	4440	5298	0.6	502.8	0.899371	THAR=0.6	Chevalier et al., 2011
	RGI60-14.26038	32.40600/79.65400	6217–5697	0	0	5697	5800.8	0.6	0	0.108805	THAR=0.6	RGI 6.0, 2017; This study
						Minimum ELA corresponding to the local LGM (m asl) ==>	5234
Xainza-1 (Inner Tibet)	Headwall	30.61830/88.46012	5900	-	-	-	-
	Chev2011-J	30.59900/88.52900	4975	320.8	120.4	4875	5490	0.6	309.2	1	THAR=0.6	Chevalier et al., 2011
	Chev2011-K	30.59500/88.51900	5000	47.2	8.5	4920	5508	0.6	291.2	0.956098	THAR=0.6	Chevalier et al., 2011
	Chev2011-L	30.61100/88.49700	5250	13.7	3.1	5250	5640	0.6	159.2	0.634146	THAR=0.6	Chevalier et al., 2011
	RGI60-13.49524	30.62100/88.46300	5904–5648	0	0	5648	5799.2	0.6	0	0.245854	THAR=0.6	RGI 6.0, 2017; This study
						Minimum ELA corresponding to the local LGM (m asl) ==>	5490
Xainza-2 (Inner Tibet)	Headwall	30.04722/88.44836	5810	-	-	-	-
	Chev2011-M	30.07900/88.42500	5330	38.1	18.4	5050	5506	0.6	213.6	1	THAR=0.6	Chevalier et al., 2011
	RGI60-13.49505	30.08100/88.46600	5826–5584	0	0	5584	5719.6	0.6	0	0.297368	THAR=0.6	RGI 6.0, 2017; This study
						Minimum ELA corresponding to the local LGM (m asl) ==>	5506
Xainza-3 (Inner Tibet)	Headwall	29.87657/88.34573	6000	-	-	-	-
	Chev2011-N	29.93600/88.34900	5190	31.5	8.1	4965	5586	0.6	256.4	1	THAR=0.6	Chevalier et al., 2011
	RGI60-13.28247	29.88200/88.35100	6007–5606	0	0	5606	5842.4	0.6	0	0.380676	THAR=0.6	RGI 6.0, 2017; This study
						Minimum ELA corresponding to the local LGM (m asl) ==>	5586
Xainza-4 (Inner Tibet)	Headwall	29.76492/88.27966	6155	-	-	-	-
	Chev2011-O	29.82100/88.19400	5370	21.7	10	4930 (?)	5440	-	520.2	1	MELM	Chevalier et al., 2011
	RGI60-13.28213	29.76700/88.27500	6158–5668	0	0	5668	5960.2	0.6	0	0.272448	THAR=0.6	RGI 6.0, 2017; This study
						Minimum ELA corresponding to the local LGM (m asl) ==>	5440
Notes:
* Calculation of the mean age for the group after rejecting outliers by "normalized deviation" method.
† Total uncertainty compounds the 1σ standard deviation of the group after outlier rejection and the average of 1σ external uncertainties of individual ages in the group
§ ΔELAnorm is normalized ELA depression. The value means there was no modern glacier in the studied valley, and the modern ELA was estimated from the adjacent mountain range
# MELM stands for Maximum Elevation of Lateral Moraine.
# THAR stands for Toe–Headwall Altitude Ratio.
The numers with RGI refer to the modern glaciers from Randolph Glacier Inventory Version 6.0 (RGI Consortium, 2017: https://doi.org/10.7265/N5-RGI-60)

## Sheet: Table S10
Table S10. Dated ΔELA and modern climate at the modern ELA
Glacier development in continental climate regions of central Asia
Jigjidsurengiin Batbaatar, Alan R. Gillespie, Michele Koppes, Douglas H. Clark, Oliver A. Chadwick, David Fink, Ari Matmon, Summer Rupper
corresponding author email: bataa@uw.edu
Site (Subregion)	Group-ID	Latitude (°N)	Longitude (°E)	Modern glacier (ID# from Randolph Glacier Inventory v 6.0)	Mean group age (ka)	1σ total uncertainty of the group age (ka)	1σ total uncertainty of the group age (%)	Paleo-ELA (m asl)	Modern ELA (m asl)	ΔELA (m)	ΔELAnorm	JJA Lapse rate ± uncertainty (°C km−1)		Modern annual ppt (mm)	Modern JJA Tair at modern ELA ± uncertainty (°C)		Melt Fraction (Rupper and Roe, 2008)	ΔTair (ΔELA/Lapse rate, °C)	References for age data
Aksaiqin (W Kunlun)	Aksaiqin-A	35.3966	80.3429	RGI60-13.53668	31.1	13	0.418006	5966	5998	32	0.86	6.68	0.05	116	-1.1	1.1	0.3	0.2	This study
Aksaiqin (W Kunlun)	Aksaiqin-B	35.3972	80.3655	RGI60-13.53668	> 29 (?)	?	--	5974	5998	24	0.84	6.68	0.05	116	-1.1	1.1	0.3	0.2	This study
Aksaiqin (W Kunlun)	Aksaiqin-min (?)	35.3785	80.3186	RGI60-13.53668	?	?	--	5902	5998	96	1	6.68	0.05	116	-1.1	1.1	0.3	0.6	This study
Ala Bash (W Tian Shan)	Kopp2008-I	42.08	76.458	RGI60-13.09249	68.2	9.4	0.13783	3206	3780	574	0.97	6.51	0.07	313	4.9	0.9	0.4	3.7	Koppes et al., 2008
Ala Bash (W Tian Shan)	Kopp2008-J	42.089	76.466	RGI60-13.09249	142.1	25.7	0.180859	3210	3780	570	0.96	6.51	0.07	313	4.9	0.9	0.4	3.7	Koppes et al., 2008
Ala Bash (W Tian Shan)	Kopp2008-K	42.094	76.461	RGI60-13.09249	102.1	15	0.146915	3184	3780	596	1	6.51	0.07	313	4.9	0.9	0.4	3.9	Koppes et al., 2008
Ala Bash (W Tian Shan)	Kopp2008-L	42.064	76.443	RGI60-13.09249	72.2	30.5	0.422438	3380	3780	400	0.72	6.51	0.07	313	4.9	0.9	0.4	2.6	Koppes et al., 2008
Alashanje (E Tian Shan)	Alashanje	42.9269	86.8783	RGI60-13.48109	67.7	24.8	0.366322	3812	4049	237	0.8	6.43	0.05	248	3.4	0.7	0.1	1.5	This study
Alashanje (E Tian Shan)	Alashanje-min	42.8827	86.9231	RGI60-13.48109	?	?	--	3712	4049	337	1	6.43	0.05	248	3.4	0.7	0.1	2.2	This study
Alashanje (E Tian Shan)	Li2014-B	43.028	86.923	RGI60-13.48109	17.5	5.8	0.331429	3928	4049	121	0.57	6.43	0.05	248	4.4	0.7	0.1	0.8	Li et al., 2014; This study
Alashanje (E Tian Shan)	Li2014-C	42.999	86.917	RGI60-13.48109	28.8	6.6	0.229167	3976	4049	73	0.48	6.43	0.05	248	3.4	0.7	0.1	0.5	Li et al., 2014; This study
Alashanje (E Tian Shan)	Li2014-D	42.993	86.919	RGI60-13.48109	25.8	5.2	0.20155	3923	4049	126	0.59	6.43	0.05	248	3.4	0.7	0.1	0.8	Li et al., 2014; This study
Alashanje (E Tian Shan)	Li2014-E	42.921	86.924	RGI60-13.48109	46.8	12.3	0.262821	3772	4049	277	0.88	6.43	0.05	248	3.4	0.7	0.1	1.8	Li et al., 2014; This study
Alashanje (E Tian Shan)	Li2014-F	42.941	86.898	RGI60-13.48109	76.1	11.2	0.147175	3824	4049	225	0.78	6.43	0.05	248	3.4	0.7	0.1	1.4	Li et al., 2014; This study
Altyn Tagh (Qilian Shan)	Altyn-Tagh-A	39.3145	93.7419	RGI60-13.33340	>1.4 (?)	-	--	5057	5081	24	0.95	6.75	0.03	64	6.9	1.4	0.5	0.2	This study
Altyn Tagh (Qilian Shan)	Altyn-Tagh-min (?)	39.3205	93.7407	RGI60-13.33340	MIS 2 (?)	?	--	5034	5081	47	1	6.75	0.03	64	6.9	1.4	0.5	0.3	This study
Ama Drime (E Himalaya)	Ama Dime-min (?)	28.1103	87.6955	RGI60-15.10593	MIS 3 (?)	?	--	5598	5917	319	1	6.06	0.07	720	4.2	0.5	0.9	1.9	This study
Ama Drime (E Himalaya)	Chev2011-R	28.15	87.651	RGI60-15.10593	19.4	3.3	0.170103	5694	5917	223	0.82	6.06	0.07	720	4.2	0.5	0.9	1.4	Chevalier et al., 2011
Ama Drime (E Himalaya)	Chev2011-S	28.146	87.653	RGI60-15.10593	17.8	3.1	0.174157	5694	5917	223	0.82	6.06	0.07	720	4.2	0.5	0.9	1.4	Chevalier et al., 2011
Ama Drime (E Himalaya)	Chev2011-T	28.131	87.671	RGI60-15.10593	27.4	4.2	0.153285	5654	5917	263	0.89	6.06	0.07	720	4.2	0.5	0.9	1.6	Chevalier et al., 2011
At Bashi (W Tian Shan)	At Bashi-min	40.7545	75.5366	RGI60-13.10354	?	?	--	4016	4186	170	1	6.74	0.07	313	1.3	1.5	0.5	1.1	This study
At Bashi (W Tian Shan)	Zec2012-A	40.7827	75.4876	RGI60-13.10354	16.4	2.9	0.176829	4134	4186	52	0.61	6.74	0.07	313	1.2	1.7	0.5	0.4	Zech et al., 2012
At Bashi (W Tian Shan)	Zec2012-B	40.7874	75.4728	RGI60-13.10354	19.1	3.9	0.204188	4020	4186	166	0.99	6.74	0.07	313	1.2	1.7	0.5	1.1	Zech et al., 2012
At Bashi (W Tian Shan)	Zec2012-C	40.765	75.5025	RGI60-13.10354	64.8	9	0.138889	4042	4186	144	0.91	6.74	0.07	313	1.3	1.5	0.5	1	Zech et al., 2012
Barskoon-Suek (W Tian Shan)	Barskoon Suu-A	41.8702	77.7341	RGI60-13.06827	16.6	3.1	0.186747	4016	4068	52	0.44	6.51	0.07	254	2.3	1.3	0.5	0.3	This study
Barskoon-Suek (W Tian Shan)	Barskoon Suu-C	41.8832	77.7057	RGI60-13.06827	0.4	0.2	0.5	4020	4068	48	0.43	6.51	0.07	254	2.3	1.3	0.5	0.3	This study
Barskoon-Suek (W Tian Shan)	Blom-A	41.6192	77.7288	RGI60-13.06827	89.5	17.8	0.198883	3808	4068	260	1	6.51	0.07	254	2.3	1.3	0.5	1.7	Blomdin et al., 2016
Barskoon-Suek (W Tian Shan)	Blom-B	41.6403	77.85	RGI60-13.06827	25.7	8.2	0.319066	3824	4068	244	0.96	6.51	0.07	254	2.3	1.3	0.5	1.6	Blomdin et al., 2016
Barskoon-Suek (W Tian Shan)	Suek-A	41.7082	77.8054	RGI60-13.06827	20.8	3	0.144231	3881	4068	187	0.8	6.51	0.07	254	2.3	1.3	0.5	1.2	This study
Bayan Har Shan-1 (Inner Tibet)	Heym2011-C	33.9867	97.449	RGI60-13.23950	13.9	2.5	0.179856	4907	5528	621	0.88	6.37	0.06	528	-2.1	1	0.7	4	Heyman et al., 2011
Bayan Har Shan-1 (Inner Tibet)	Heym2011-J	33.8769	97.2316	RGI60-13.23950	52.3	7.5	0.143403	4878	5528	650	1	6.37	0.06	528	-2.1	1	0.7	4.1	Heyman et al., 2011
Bayan Har Shan-1 (Inner Tibet)	Heym2011-M	33.9648	97.3253	RGI60-13.23950	154.3	27.3	0.176928	4902	5528	626	0.9	6.37	0.06	528	-2.1	1	0.7	4	Heyman et al., 2011
Bayan Har Shan-2 (Inner Tibet)	Heym2011-G	34.157	98.0203	RGI60-13.23886	57.2	10	0.174825	4914	5516	602	1	6.37	0.06	615	-2.4	1.2	0.8	3.8	Heyman et al., 2011
Bayan Har Shan-2 (Inner Tibet)	Heym2011-L	34.1561	97.7085	RGI60-13.23886	23.5	3.3	0.140426	4942	5516	574	0.87	6.37	0.06	615	-0.9	1.2	0.8	3.7	Heyman et al., 2011
Bayan Har Shan-2 (Inner Tibet)	Heym2011-O	34.1643	98.1315	RGI60-13.23886	34.3	8	0.233236	4938	5516	578	0.89	6.37	0.06	615	-2.4	1.2	0.8	3.7	Heyman et al., 2011
Bayan Har Shan-3 (Inner Tibet)	Heym2011-D	34.6049	98.0151	RGI60-13.23886	69.3	14	0.20202	4778	5516	738	1	6.37	0.06	615	-2.3	1.3	0.8	4.7	Heyman et al., 2011
Bayan Har Shan-3 (Inner Tibet)	Heym2011-E	34.5258	97.9875	RGI60-13.23886	57.3	12.2	0.212914	4810	5516	706	0.91	6.37	0.06	615	-2.8	1.4	0.8	4.5	Heyman et al., 2011
Bayan Har Shan-3 (Inner Tibet)	Heym2011-I	34.3915	97.7596	RGI60-13.23886	71.3	10.3	0.14446	4882	5516	634	0.7	6.37	0.06	615	-0.9	1.2	0.8	4	Heyman et al., 2011
Bayan Har Shan-3 (Inner Tibet)	Heym2011-N	34.3373	97.6061	RGI60-13.23886	57.8	7.5	0.129758	4898	5516	618	0.66	6.37	0.06	615	-0.9	1.2	0.8	3.9	Heyman et al., 2011
Borohoro-1 (E Tian Shan)	Borohoro-1_min	43.8199	84.4722	RGI60-13.23886	?	?	--	3274	3744	470	1	6.44	0.03	263	5.5	1	0.9	3	This study
Borohoro-1 (E Tian Shan)	Li2016-B	43.7387	84.4032	RGI60-13.23886	0.3	0.1	0.333333	3706	3744	38	0.32	6.31	0.02	263	5.5	1	0.9	0.2	Li et al., 2016
Borohoro-2 (E Tian Shan)	Zhan2016a-D	43.1763	84.8808	RGI60-13.29827	58.7	10.6	0.180579	3306	3828	522	1	6.31	0.02	263	2.3	0.9	0.9	3.3	Zhang et al., 2016a
Borohoro-3 (E Tian Shan)	Borohoro-2_min	43.108	85.621	RGI60-13.44596	?	?	--	3672	4165	493	1	6.31	0.02	248	1.5	0.6	0.3	3.1	This study
Borohoro-3 (E Tian Shan)	Zhan2016a-F	43.1169	85.7596	RGI60-13.44596	18.3	5.2	0.284153	3748	4165	417	0.84	6.31	0.02	248	1.5	0.6	0.3	2.6	Zhang et al., 2016a
Bumbat valley (Hangai)	Batb2018-Q	47.418	100.353	RGI60-10.02907	34.3	7.6	0.221574	2782	3839	1057	0.98	6.5	0.02	242	1.1	1.3	0.9	6.9	Batbaatar et al., 2018
Bumbat valley (Hangai)	Moraine BU1	47.4355	100.347	RGI60-10.02907	>> 22 (?)	-	--	2771	3839	1068	1	6.5	0.02	242	1.1	1.3	0.9	6.9	Batbaatar et al., 2018
Chagan Uzun (Altai)	Grib2016-A	49.9521	88.0889	RGI60-10.01836	19.1	2.4	0.125654	2635	3196	561	0.76	6.31	0.07	204	4.4	1.2	0.9	3.5	Gribenski et al., 2016
Chagan Uzun (Altai)	Grib2016-B	49.9623	88.1342	RGI60-10.01836	25.4	9.4	0.370079	2325	3196	871	1	6.31	0.07	204	4.4	1.2	0.8	5.5	Gribenski et al., 2016
Chagan Uzun (Altai)	Grib2016-C	49.95	88.1106	RGI60-10.01836	18.3	3.3	0.180328	2325	3196	871	1	6.31	0.07	204	4.4	1.2	0.9	5.5	Gribenski et al., 2016
Chagan Uzun (Altai)	Grib2016-D	49.9757	88.1786	RGI60-10.01836	19.4	3.6	0.185567	2960	3196	236	0.51	6.31	0.07	204	4.4	1.2	0.8	1.5	Gribenski et al., 2016
Chagan Uzun (Altai)	Grib2016-E	50.0166	88.3524	RGI60-10.01836	18.8	3.8	0.202128	2916	3196	280	0.54	6.31	0.07	510	4.4	1.3	0.8	1.8	Gribenski et al., 2016
Chagan Uzun (Altai)	Reu2007-E	50.013	88.294	RGI60-10.01836	20.9	6.9	0.330144	2952	3196	244	0.52	6.31	0.07	510	4.4	1.3	0.8	1.5	Reuther et al., 2007
Cho Oyu (E Himalaya)	Chev2011-U	28.348	86.627	RGI60-15.10147	33.2	5.2	0.156627	5968	6066	98	0.88	6.06	0.07	1001	6.1	0.9	0.9	0.6	Chevalier et al., 2011
Cho Oyu (E Himalaya)	Cho Oyu min	28.4083	86.6495	RGI60-15.10147	?	?	--	5872	6066	194	1	6.06	0.07	1001	6.1	0.9	0.9	1.2	This study
Choktal (W Tian Shan)	Choktal river-A	42.7014	76.7009	RGI60-13.10123	22.2	3.7	0.166667	3722	4184	462	0.94	6.51	0.07	416	7.6	1	0.4	3	This study
Choktal (W Tian Shan)	Choktal river-B	42.7497	76.6954	RGI60-13.10123	15.4	2.5	0.162338	4092	4184	92	0.48	6.51	0.07	416	7.6	1	0.4	0.6	This study
Choktal (W Tian Shan)	Choktal river-C	42.7478	76.6939	RGI60-13.10123	0.3	0.1	0.333333	4106	4184	78	0.46	6.51	0.07	416	7.6	1	0.4	0.5	This study
Choktal (W Tian Shan)	Choktal-min	42.6664	76.69	RGI60-13.10123	?	?	--	3678	4184	506	1	6.51	0.07	416	7.6	1	0.4	3.3	This study
Chuluut (Hangai)	Smit2016-C	47.4126	100.257	RGI60-10.02907	22.8	3.3	0.144737	2983	3839	856	1	6.5	0.02	242	1.1	1.3	0.9	5.6	Smith et al., 2016
Daxigou (E Tian Shan)	Daxigou-min	43.1121	86.9896	RGI60-13.45335	?	?	--	3574	3998	424	1	6.43	0.05	248	4.7	0.7	0.1	2.7	This study
Daxigou (E Tian Shan)	Kong2009-C	43.1163	86.9292	RGI60-13.45335	17.7	2.5	0.141243	3738	3998	260	0.72	6.43	0.05	248	4.7	0.7	0.1	1.7	Kong et al., 2009
Daxigou (E Tian Shan)	Kong2009a-A	43.1138	86.8428	RGI60-13.45335	19.6	5.4	0.27551	3898	3998	100	0.44	6.43	0.05	248	4.7	0.7	0.1	0.6	Kong et al., 2009; This study
Daxigou (E Tian Shan)	Li2011-D	43.11	86.945	RGI60-13.45335	19.3	3.6	0.186528	3674	3998	324	0.83	6.43	0.05	248	4.7	0.7	0.1	2.1	Li et al., 2011; This study
Daxigou (E Tian Shan)	Li2011-E	43.119	86.92	RGI60-13.45335	17.44	4.2	0.240826	3762	3998	236	0.67	6.43	0.05	248	4.7	0.7	0.1	1.5	Li et al., 2011; This study
Diehanjelegou (E Tian Shan)	Diehanjelegou-B	43.1575	87.4502	RGI60-13.48197	31.9	10.8	0.338558	3624	3873	249	0.99	6.43	0.05	248	7.4	0.9	0.7	1.6	This study
Diehanjelegou (E Tian Shan)	Diehanjelegou-C	43.1588	87.441	RGI60-13.48197	30	12.9	0.43	3620	3873	253	1	6.43	0.05	248	7.4	0.9	0.7	1.6	This study
Dumda (Qilian Shan)	Dumda-A	37.8599	96.2881	RGI60-13.35425	131.5	19.2	0.146008	4763	5059	296	1	6.55	0.04	115	2.4	1.5	0.1	1.9	This study
Dumda (Qilian Shan)	Dumda-B	37.9436	96.3555	RGI60-13.35425	?	?	--	4883	5059	176	0.75	6.55	0.04	115	2.4	1.5	0.1	1.2	This study
Gangshiqia (Qilian Shan)	Qilian Shan-A	37.6634	101.427	RGI60-13.23977	18.2	2.6	0.142857	3710	4767	1057	0.98	6.51	0.03	210	-1.9	1.1	0.4	6.9	This study
Gangshiqia (Qilian Shan)	Qilian Shan-B	37.6605	101.424	RGI60-13.23977	14	2.4	0.171429	3680	4767	1087	1	6.51	0.03	210	-1.9	1.1	0.4	7.1	This study
Gangshiqia (Qilian Shan)	Qilian Shan-D	37.6936	101.452	RGI60-13.23977	11.7	4.9	0.418803	4320	4767	447	0.53	6.51	0.03	210	-1.9	1.1	0.4	2.9	This study
Gichginii range (Gob-Altai)	Batb2018-A	45.4039	97.0703	RGI60-10.02900 (Sutai)	7.4	1.3	0.175676	3330	3745	415	0.92	6.25	0.04	147	15.8	1.2	0.1	2.6	Batbaatar et al., 2018
Gichginii range (Gob-Altai)	Batb2018-B	45.4015	97.0697	RGI60-10.02900 (Sutai)	2.5	0.8	0.32	3360	3745	385	0.67	6.25	0.04	147	15.8	1.2	0.1	2.4	Batbaatar et al., 2018
Gichginii range (Gob-Altai)	Batb2018-C	45.4012	97.0697	RGI60-10.02900 (Sutai)	1.4	0.6	0.428571	3365	3745	380	0.63	6.25	0.04	147	15.8	1.2	0.1	2.4	Batbaatar et al., 2018
Gichginii range (Gob-Altai)	Moraine G1	45.4031	97.071	RGI60-10.02900 (Sutai)	?	?	--	3320	3745	425	1	6.25	0.04	147	15.8	1.2	0.1	2.7	Batbaatar et al., 2018
Gichginii range (Gob-Altai)	Moraine G5	45.4018	97.0687	RGI60-10.02900 (Sutai)	?	?	--	3370	3745	375	0.58	6.25	0.04	147	15.8	1.2	0.1	2.3	Batbaatar et al., 2018
Gulbel (W Tian Shan)	Gulbel pass-A	42.0389	77.1242	RGI60-13.09143	21.9	2.8	0.127854	3588	4012	424	1	6.51	0.07	313	-2.2	1.2	0.5	2.8	This study
Gulbel (W Tian Shan)	Gulbel pass-C	42.0143	77.1993	RGI60-13.09143	17.3	3	0.17341	3792	4012	220	0.71	6.51	0.07	313	-2.2	1.2	0.5	1.4	This study
Gulbel (W Tian Shan)	Gulbel pass-D	42.0115	77.1996	RGI60-13.09143	16.8	2.8	0.166667	3866	4012	146	0.6	6.51	0.07	313	-2.2	1.2	0.5	1	This study
Gulbel (W Tian Shan)	Kopp2008-A–B	42.038	77.219	RGI60-13.09143	37.5	9.8	0.261333	3718	4012	294	0.81	6.51	0.07	313	-2.2	1.2	0.5	1.9	Koppes et al., 2008
Gyalgar (Hangai)	BatGil2016-K	48.1838	98.7815	RGI60-10.02907	21.9	4.1	0.187215	2801	3839	1038	0.78	6.5	0.02	263	-0.4	1.3	0.9	6.7	Batbaatar and Gillespie, 2016
Gyalgar (Hangai)	BatGil2016-L	48.118	98.8158	RGI60-10.02907	19.6	4.7	0.239796	2726	3839	1113	1	6.5	0.02	263	-0.4	1.3	0.9	7.2	Batbaatar and Gillespie, 2016
Gyalgar (Hangai)	BatGil2016-N	48.1829	98.8047	RGI60-10.02907	22.8	4.4	0.192982	2801	3839	1038	0.78	6.5	0.02	263	-0.4	1.3	0.9	6.7	Batbaatar and Gillespie, 2016
Haiyuan (Qilian Shan)	Lass2002-A	37.533	101.849	RGI60-13.31354	9.5	5.6	0.589474	4000	4410	410	0.73	6.51	0.03	210	1.7	1.1	0.4	2.7	Lasserre et al., 2002
Haiyuan (Qilian Shan)	Qilian Shan-3A	37.5395	101.85	RGI60-13.31354	?	?	--	3790	4410	620	1	6.51	0.03	210	1.7	1.1	0.4	4	This study
Hogyin (Darhad)	Gill2008-F	51.006	99.125	RGI60-10.02911	125.2	26.8	0.214058	2243	3188	945	1	6.68	0.08	336	0.8	1.4	0.9	6.3	Gillespie et al., 2008
Hogyin (Darhad)	Gill2008-G	50.981	99.152	RGI60-10.02911	22.4	9.3	0.415179	2243	3188	945	1	6.68	0.08	336	0.6	1.2	0.9	6.3	Gillespie et al., 2008
Hoh lake (Hangai)	Hoh lake min	47.4243	98.5735	RGI60-10.02907	?	?	--	3079	3839	760	1	6.53	0.07	152	1.7	1.3	0.9	5	This study
Hoh lake (Hangai)	Smit2016-B	47.4631	98.5691	RGI60-10.02907	43.6	9.5	0.21789	3134	3839	705	0.86	6.53	0.07	152	1.7	1.3	0.9	4.6	Smith et al., 2016
Hoit Aguy (Sayan)	BatGil2016-H	51.5521	98.7147	RGI60-10.02911	34.4	4.8	0.139535	2494	3188	694	1	6.52	0.09	336	1.4	1.4	0.9	4.5	Batbaatar and Gillespie, 2016
Ih Bogd range (Gobi-Altai)	Batb2018-K	44.9563	100.267	RGI60-10.02898 (Sutai)	14	3.4	0.242857	3450	3991	541	0.69	6.24	0.09	110	4.2	1.1	0.1	3.4	Batbaatar et al., 2018
Ih Bogd range (Gobi-Altai)	Moraine IB1	44.9559	100.264	RGI60-10.02898 (Sutai)	?	?	--	3427	3991	565	1	6.24	0.09	110	4.2	1.1	0.1	3.5	Batbaatar et al., 2018
Inylchek (W Tian Shan)	Lift2014-A	42.0224	79.0786	RGI60-13.05000	31.8	9.4	0.295597	4238	4358	120	0.96	6.45	0.07	254	-0.7	1.3	0.1	0.8	Lifton et al., 2014
Inylchek (W Tian Shan)	Lift2014-D	42.0204	79.0898	RGI60-13.05000	16.4	6.4	0.390244	4218	4358	140	0.98	6.45	0.07	254	-0.7	1.3	0.1	0.9	Lifton et al., 2014
Inylchek (W Tian Shan)	Lift2014-I	41.9675	79.1062	RGI60-13.05000	145.3	39.3	0.270475	4198	4358	160	1	6.45	0.07	254	2.3	1.2	0.1	1	Lifton et al., 2014
Jarai (Darhad)	Gill2008-D	51.3996	99.7722	RGI60-10.02911	25.2	11.4	0.452381	2204	3188	984	1	6.39	0.06	336	0.9	1.4	0.9	6.3	Gillespie et al., 2008
Jarai (Darhad)	Gill2008-E	51.3993	99.7999	RGI60-10.02911	19.7	3.2	0.162437	2221	3188	967	0.96	6.39	0.06	336	0.9	1.4	0.9	6.2	Gillespie et al., 2008
Jombolok (Sayan)	Arzh2012-B	52.7522	99.7086	RGI60-10.02962	24.9	4.9	0.196787	1947	2731	784	1	6.39	0.06	536	5.5	1.6	0.9	5	Arzhannikov et al., 2012
Jombolok (Sayan)	Arzh2012-C	52.74	99.633	RGI60-10.02962	26.1	4	0.153257	1947	2731	784	1	6.39	0.06	536	5.5	1.6	0.9	5	Arzhannikov et al., 2012
Jombolok (Sayan)	BatGil2016-E	52.7311	99.615	RGI60-10.02962	20.9	4.1	0.196172	1947	2731	784	1	6.39	0.06	536	5.5	1.6	0.9	5	Batbaatar and Gillespie, 2016
Kailas (C Himalaya)	Chev2011-X	30.994	81.256	RGI60-14.27874	17.4	4.9	0.281609	5366	5698	332	0.96	6.52	0.03	507	7.3	1.8	0.9	2.2	Chevalier et al., 2011
Kailas (C Himalaya)	Chev2011-Y	31.008	81.24	RGI60-14.27874	46.5	19.2	0.412903	5346	5698	352	1	6.09	0.1	507	11.9	2	0.9	2.1	Chevalier et al., 2011
Kalurong (Inner Tibet)	Kalurong min	28.955	90.1163	RGI60-13.26374	?	?	--	6026	6158	132	1	6.71	0.07	747	0.3	0.3	0.9	0.9	This study
Kalurong (Inner Tibet)	Liu2017-C	28.95	90.135	RGI60-13.26374	21.6	2.9	0.134259	6093	6158	65	0.92	6.71	0.07	747	0.3	0.3	0.9	0.4	Liu et al., 2017
Kalurong (Inner Tibet)	Liu2017-D	28.949	90.134	RGI60-13.26374	16.7	2.4	0.143713	6093	6158	65	0.92	6.71	0.07	747	0.3	0.3	0.9	0.4	Liu et al., 2017
Kanas (Altai)	Grib2018-A	48.7111	87.0231	RGI60-10.01460	18.5	2.9	0.156757	2508	3022	514	1	6.55	0.04	476	5.5	1.2	0.9	3.4	Gribenski et al., 2018
Kanas (Altai)	Grib2018-B	48.6931	87.0143	RGI60-10.01460	21	2.6	0.12381	2508	3022	514	1	6.55	0.04	476	5.5	1.2	0.9	3.4	Gribenski et al., 2018
Karakax-A (W Kunlun)	Karakax-A	36.4368	77.6822	RGI60-13.40102	90.2	12	0.133038	5030	5726	696	1	6.85	0.07	166	0.3	1	0.8	4.8	This study
Karakax-B (W Kunlun)	Karakax-B-min	36.4133	77.637	RGI60-13.40092	?	?	--	5528	5718	190	1	6.85	0.07	166	0.4	1	0.8	1.3	This study
Karakax-B (W Kunlun)	Karakax-B2	36.4302	77.6527	RGI60-13.40092	88.7	16.9	0.19053	5644	5718	74	0.79	6.85	0.07	166	0.4	1	0.8	0.5	This study
Karakax-B (W Kunlun)	Karakax-B3	36.4262	77.644	RGI60-13.40092	80.7	13.3	0.164808	5680	5718	38	0.72	6.85	0.07	166	0.4	1	0.8	0.3	This study
Karlik Shan (E Tian Shan)	Chen2015-B	43.143	94.3803	RGI60-13.45052	14.5	1.9	0.131034	3994	4173	179	0.64	6.5	0.03	120	7.8	0.9	0.1	1.2	Chen et al., 2015
Karlik Shan (E Tian Shan)	Karlik Shan min	43.2255	94.4028	RGI60-13.45052	>23 ka (?)	-	--	3690	4173	483	1	6.5	0.03	120	7.8	0.9	0.1	3.1	Chen et al., 2015; This study
Kax Kurta (Altai)	Kax Kurta-A	47.4611	89.8725	RGI60-10.02561	17.3	2.4	0.138728	2970	3569	599	0.36	6.64	0.07	199	4	1.1	0.5	4	This study
Kax Kurta (Altai)	Kax Kurta-B	47.4686	89.8195	RGI60-10.02561	?	?	--	2838	3569	731	0.76	6.64	0.07	199	4	1.1	0.5	4.9	This study
Kax Kurta (Altai)	Kax Kurta-C	47.4611	89.7994	RGI60-10.02561	21.6 (?)	2.5	--	2758	3569	811	1	6.64	0.07	199	4	1.1	0.5	5.4	This study
La Ji (Qilian Shan)	Owen2003c-C	36.37	101.312	RGI60-13.31354	25.4	4.9	0.192913	4316	4410	94	0.76	6.51	0.03	390	4.2	1.3	0.9	0.6	Owen et al., 2003c
La Ji (Qilian Shan)	Qilian Shan-4A	36.3588	101.355	RGI60-13.31354	?	?	--	4232	4410	178	1	6.51	0.03	390	4.2	1.3	0.9	1.2	This study
Laolongwan (Qilian Shan)	Owen2003d-A	37.441	101.762	RGI60-13.24015	11	1.4	0.127273	4048	4473	425	1	6.51	0.03	390	2.8	1.1	0.9	2.8	Owen et al., 2003d
Laolongwan (Qilian Shan)	Owen2003d-E	37.46	101.766	RGI60-13.24015	19.2	2.5	0.130208	4096	4473	377	0.9	6.51	0.03	390	2.8	1.1	0.9	2.5	Owen et al., 2003d
Mawang Kangri (Inner Tibet)	Amid2013-A	34.4127	80.0464	RGI60-13.53522	62.7	14.9	0.23764	5947	6001	54	0.97	6.68	0.05	239	2.9	1.6	0.3	0.4	Amidon et al., 2013
Mawang Kangri (Inner Tibet)	Amid2013-B	34.4223	80.0476	RGI60-13.53522	91.9	11.5	0.125136	5935	6001	66	1	6.68	0.05	239	2.9	1.6	0.3	0.4	Amidon et al., 2013
Mawang Kangri (Inner Tibet)	Amid2013-C	34.4256	80.0499	RGI60-13.53522	?	?	--	5933	6001	68	1	6.68	0.05	239	2.9	1.6	0.3	0.5	Amidon et al., 2013
Menyuan (E Tibet)	Wang2013-A	35.5751	102.744	RGI60-13.23874	26.5	3.6	0.135849	3850	4992	1142	1	6.5	0.1	358	-2.5	1.3	0.9	7.4	Wang et al., 2013
Menyuan (E Tibet)	Wang2013-B	35.5692	102.74	RGI60-13.23874	51.1	14.5	0.283757	3850	4992	1142	1	6.5	0.1	358	-2.5	1.3	0.9	7.4	Wang et al., 2013
Menyuan (E Tibet)	Wang2013-C	35.5691	102.736	RGI60-13.23874	24.9	4.9	0.196787	4080	4992	912	0.66	6.5	0.1	358	-2.5	1.3	0.9	5.9	Wang et al., 2013
Menyuan (E Tibet)	Wang2013-D	35.5829	102.727	RGI60-13.23874	19.7	3.8	0.192893	4080	4992	912	0.66	6.5	0.1	358	-2.5	1.3	0.9	5.9	Wang et al., 2013
Mönh-Saridag (Sayan)	BatGil2016-A	51.7361	100.6	RGI60-10.02911	12.1	1.6	0.132231	3042	3188	146	0.41	6.39	0.06	419	3.3	1.4	0.9	0.9	Batbaatar and Gillespie, 2016
Mönh-Saridag (Sayan)	BatGil2016-B	51.7309	100.601	RGI60-10.02911	10.1	1.8	0.178218	3084	3188	104	0.35	6.39	0.06	419	3.3	1.4	0.9	0.7	Batbaatar and Gillespie, 2016
Mönh-Saridag (Sayan)	BatGil2016-C	51.7286	100.598	RGI60-10.02911	1.3	0.3	0.230769	3130	3188	58	0.29	6.39	0.06	419	3.3	1.4	0.9	0.4	Batbaatar and Gillespie, 2016
Mönh-Saridag (Sayan)	BatGil2016-D	51.7387	100.601	RGI60-10.02911	26.9	3.7	0.137546	3025	3188	163	0.43	6.39	0.06	419	3.3	1.4	0.9	1	Batbaatar and Gillespie, 2016
Mönh-Saridag (Sayan)	Mönh-Saridag min	52.0806	100.365	RGI60-10.02911	> MIS 2 (?)	?	--	2609	3188	579	1	6.39	0.06	419	0.7	1.3	0.9	3.7	This study
Muzart (W Tian Shan)	Muzart-A	41.7857	80.9061	RGI60-13.43483	21.7	7	0.322581	4490	4815	325	1	6.45	0.07	153	0.1	0.7	0.1	2.1	This study
Muzart (W Tian Shan)	Muzart-B	41.7747	80.9566	RGI60-13.43483	16	2.6	0.1625	4518	4815	297	0.98	6.45	0.07	153	0.1	0.7	0.1	1.9	This study
Nyainqentanghla (Inner Tibet)	Dong2017a-A	29.8506	90.0639	RGI60-13.28457	19.6	4.4	0.22449	5450	5597	147	0.87	6.71	0.07	747	3.4	0.5	0.9	1	Dong et al., 2017a
Nyainqentanghla (Inner Tibet)	Dong2017a-B	29.8426	90.064	RGI60-13.28457	20.3	4.5	0.221675	5430	5597	167	0.91	6.71	0.07	747	3.4	0.5	0.9	1.1	Dong et al., 2017a
Nyainqentanghla (Inner Tibet)	Nyainqentanghla min	29.8079	90.0391	RGI60-13.28457	?	?	--	5390	5597	207	1	6.71	0.07	747	3.4	0.5	0.9	1.4	This study
Otgontenger, Bitüüt (Hangai)	Batb2018-M	47.5755	97.6677	RGI60-10.02907	30	4	0.133333	2859	3839	981	0.97	6.53	0.07	263	3.1	1.3	0.9	6.4	Batbaatar et al., 2018
Otgontenger, Bitüüt (Hangai)	Batb2018-O	47.6035	97.6405	RGI60-10.02907	16.3	2.1	0.128834	2941	3839	898	0.64	6.53	0.07	263	3.1	1.3	0.9	5.9	Batbaatar et al., 2018
Otgontenger, Bitüüt (Hangai)	Moraine BI1	47.5721	97.6751	RGI60-10.02907	?	?	--	2852	3839	987	1	6.53	0.07	263	3.1	1.3	0.9	6.4	Batbaatar et al., 2018
Otgontenger, Bogd (Hangai)	Roth2014b-A	47.6833	97.2067	RGI60-10.02907	19.6	5.5	0.280612	2841	3839	998	1	6.53	0.07	223	1.4	1.3	0.9	6.5	Rother et al., 2014; Batbaatar et al., 2018
Otgontenger, Bogd (Hangai)	Roth2014b-B	47.6883	97.2496	RGI60-10.02907	19.8	3.2	0.161616	2875	3839	964	0.94	6.53	0.07	223	1.4	1.3	0.9	6.3	Rother et al., 2014
Otgontenger, Bogd (Hangai)	Roth2014b-E	47.6835	97.2098	RGI60-10.02907	42.7	5.9	0.138173	2841	3839	998	1	6.53	0.07	223	1.4	1.3	0.9	6.5	Rother et al., 2014
Sailag (Sayan)	Arzh2012-D	52.7771	99.7184	RGI60-10.02962	17.8	6.5	0.365169	2182	2731	550	1	6.39	0.06	536	5.5	1.6	0.9	3.5	Arzhannikov et al., 2012; Batbaatar and Gillespie, 2016
Suek (W Tian Shan)	Blom-A	41.6192	77.7288	RGI60-13.07064	89.5	17.8	0.198883	3940	4154	214	1	6.51	0.07	254	1.7	1.3	0.5	1.4	Blomdin et al., 2016
Suek (W Tian Shan)	Blom-B	41.6403	77.85	RGI60-13.07064	25.7	8.2	0.319066	3956	4154	198	0.97	6.51	0.07	254	1.7	1.3	0.5	1.3	Blomdin et al., 2016
Suek (W Tian Shan)	Blom-C	41.8168	78.1169	RGI60-13.07064	16.9	5.1	0.301775	4080	4154	74	0.7	6.51	0.07	254	2	1.3	0.5	0.5	Blomdin et al., 2016
Suek (W Tian Shan)	Blom-D	41.8143	78.1118	RGI60-13.07064	15.2	2.3	0.151316	4108	4154	46	0.63	6.51	0.07	254	2	1.3	0.5	0.3	Blomdin et al., 2016
Suek (W Tian Shan)	Suek-A	41.7082	77.8054	RGI60-13.07064	20.8	3	0.144231	4013	4154	141	0.84	6.51	0.07	254	1.7	1.3	0.5	0.9	This study
Sutai range, NE (Gobi-Altai)	Batb2018-E	46.6418	93.5659	RGI60-10.02900	24.2	4.3	0.177686	3567	3745	179	0.8	6.64	0.09	122	4.6	1	0.5	1.2	Batbaatar et al., 2018
Sutai range, NE (Gobi-Altai)	Moraine N1	46.6418	93.571	RGI60-10.02900	?	?	--	3510	3745	235	1	6.64	0.09	122	4.6	1	0.5	1.6	Batbaatar et al., 2018
Sutai range, SW (Gobi-Altai)	Batb2018-J	46.6132	93.5503	RGI60-10.02893	15.9	3.8	0.238994	3275	3867	592	1	6.64	0.09	122	3.8	1	0.5	3.9	Batbaatar et al., 2018
Tailan (W Tian Shan)	Hube2005-A	41.619	80.476	RGI60-13.43267	17.7	5.9	0.333333	3970	4564	594	0.98	6.45	0.07	153	5.3	0.8	0.1	3.8	Hubert-Ferrari et al., 2005
Tailan (W Tian Shan)	Tailan-A	41.6086	80.4983	RGI60-13.43267	?	?	--	3944	4564	620	1	6.45	0.07	153	5.3	0.8	0.1	4	This study
Takelekete (W Tian Shan)	Zhan2016a-B	42.9917	83.5855	RGI60-13.44521	52	17.9	0.344231	3403	3709	306	1	6.33	0.06	263	1.4	0.8	0.4	1.9	Zhang et al., 2016
Tanggula Shan-1 (Inner Tibet)	Schä2002-E	32.932	91.966	RGI60-13.24560	75.2	24.9	0.331117	5472	5524	52	1	6.56	0.06	317	2.3	1.1	0.8	0.3	Schäfer, 2000; Colgan et al., 2006
Tanggula Shan-2 (Inner Tibet)	Owen2005-L	32.8276	91.907	RGI60-13.49424	57.5	9.4	0.163478	5361	5576	215	0.9	6.56	0.06	317	1.9	1.1	0.8	1.4	Owen et al., 2005
Tanggula Shan-2 (Inner Tibet)	Owen2005-M	32.8203	91.8892	RGI60-13.49424	98.9	53	0.535895	5341	5576	235	1	6.56	0.06	317	1.9	1.1	0.8	1.5	Owen et al., 2005
Tangra Yum Co (Inner Tibet)	Rade2015-C	30.6757	86.5319	RGI60-13.50116	19.5	2.9	0.148718	5600	6011	411	0.6	6.7	0.07	411	2.2	0.8	0.8	2.8	Rades et al., 2015
Tangra Yum Co (Inner Tibet)	Tangra Yum Co min	30.6724	86.5391	RGI60-13.50116	?	?	--	5200	6011	811	1	6.7	0.07	411	2.2	0.8	0.8	5.4	This study
Tengis (Sayan)	BatGil2016-I	51.4536	99.0387	RGI60-10.02915	21.9	3.6	0.164384	2280	3329	1049	1	6.39	0.06	336	0.3	1.4	0.9	6.7	Batbaatar and Gillespie, 2016
Tengis (Sayan)	Gill2008-A	51.4792	99.0555	RGI60-10.02915	22.2	3.4	0.153153	2280	3329	1049	1	6.39	0.06	336	0.3	1.4	0.9	6.7	Gillespie et al., 2008
W Himalaya	Chev2011-AB	32.4852	79.6688	RGI60-14.26038	152	41.9	0.275658	5234	5801	567	1	6.45	0.02	1021	1	2	0.9	3.7	Chevalier et al., 2011
W Himalaya	Chev2011-AC	32.49	79.6492	RGI60-14.26038	89.1	22.6	0.253648	5298	5801	503	0.9	6.45	0.02	1021	1	2	0.9	3.2	Chevalier et al., 2011
W Himalaya	Chev2011-AD	32.4866	79.6474	RGI60-14.26038	59.1	27.2	0.460237	5274	5801	527	0.94	6.45	0.02	1021	1	2	0.9	3.4	Chevalier et al., 2011
Xainza-1 (Inner Tibet)	Chev2011-J	30.599	88.529	RGI60-13.49524	320.8	120.4	0.375312	5490	5799	309	1	6.7	0.07	410	3.2	0.6	0.9	2.1	Chevalier et al., 2011
Xainza-1 (Inner Tibet)	Chev2011-K	30.595	88.519	RGI60-13.49524	47.2	8.5	0.180085	5508	5799	291	0.96	6.7	0.07	410	3.2	0.6	0.9	1.9	Chevalier et al., 2011
Xainza-1 (Inner Tibet)	Chev2011-L	30.611	88.497	RGI60-13.49524	13.7	3.1	0.226277	5640	5799	159	0.63	6.7	0.07	410	3.5	0.7	0.9	1.1	Chevalier et al., 2011
[truncated: 11 more rows]
